# Supplementary material for: A Systems Biology Approach Reveals the Role of a Novel Methyltransferase in Response to Chemical Stress and Lipid Homeostasis
Source: PLoS Genet. 2011 Oct 20;7(10):e1002332. doi: 10.1371/journal.pgen.1002332 (PMC3197675; doi:10.1371/journal.pgen.1002332)
Supplement: Dataset S1 — Chemical SGA. Fitness profiling of wild-type double deletion mutants (ura3ΔxxxΔ) with cantharidin. (XLS) [file pgen.1002332.s001.xls]

## Sheet: Sheet1
probe	assignset	strain::batch:tag	wt_drug_1	wt_dmso_1	wt_drug_2	wt_dmso_2	wt_drug_3	wt_dmso_3	wt_dmso_4	wt_drug_4
AAACAAACACCCGCGTGGTT	Standard	YDL227C::ctrl_1:uptag	5471.25	5514.6	5320	5483.2	3985.6	4501.2	2580.2	2476.8
AAACAACGAACCCGCTGGTG	Standard	YDL171C::chr4_2:dntag	1274.75	1206.6	1679.4	1513.4	1476.4	1745.8	1078	1213.6
AAACACTGAAACCCGTCTGG	Standard	YDL172C::chr4_2:dntag	685.5	488.4	768.8	663.4	1516.8	1010.2	379.6	484.8
AAACATGGAAACCCTGGGCC	Standard	YGR044C::chr7_4:dntag	1584.6	1226.4	1559.2	1624.6	3219.2	2720.8	1733.4	1754.2
AAACCAGAAACCCTTGCGGG	Standard	YDL227C::ctrl_9:uptag	3769.8	3522.2	3720.8	3866.4	4489.4	3857.4	1721.2	1730.4
AAACCGAAACACGCCGTTGG	Standard	YDL173W::chr4_2:dntag	549.75	613.6	891.6	734.8	1098.6	668.6	338.6	384.6
AAACCGAGAAACCGGCCTGT	Standard	YDR223W::chr4_5:uptag	1809.8	1662	1863.4	2210.6	2339.8	1897.4	966.4	881.4
AAACCTGCAAACACTCGGGT	Standard	YDR224C::chr4_5:uptag	75.5	59.2	67.6	69	78.4	70.75	54.6	48.2
AAACGCGAAACAGCCTCGGT	Standard	YLR048W::chr12_2:uptag	248.4	302.8	209.6	204.4	676.8	261.4	184.8	94.6
AAACGTAAACACTGCGCCGG	Standard	YML115C::chr00_15:uptag	86.4	91.4	83.8	97.5	204.4	88.2	64.4	62.6
AAACGTAGAAACCGTGCGCC	Standard	YML114C::chr00_9:uptag	67.2	62.8	60.8	66	78.6	71.4	53	48
AAACTAGGAAACCGTCGTCC	Standard	YML113W::chr00_9:uptag	3601.6	3100.8	3341.8	3672.2	2954.8	3898.8	2315.6	2233.4
AAACTCGTAAACACGTTCCG	Standard	YML056C::chr13_1b:uptag	250	253.8	221.25	249	509.8	363.4	217.6	181
AAACTCTAAACAGCTCTCG	Standard	YML055W::chr13_1b:uptag	1722.8	1204.8	1365.25	1011.8	2262.4	1935.2	702.8	577.4
AAACTGACAAACCGTTCCGG	Standard	YDL174C::chr4_2:dntag	1217.8	1154.6	1275	1394.2	2199.6	1879.4	1039.8	1156.2
AAACTTCAAACAGGTGCCCG	Standard	YGL085W::chr7_1:dntag	82.6	87	95.2	81.8	141.2	116.8	85.8	83.6
AAAGAAATACCCGGCCCTGG	Standard	YGR089W::chr00_14:uptag	1928	2360.2	2183.6	2044.6	2790	2563	697.2	916.2
AAAGAACAACCCTCCGTGGG	Standard	YGL086W::chr7_1:dntag	1469.6	952.8	1662.8	1482.2	2418.4	2260.2	1187.2	1446.6
AAAGACAAACCCGCTTCGGT	Standard	YDL227C::ctrl_9:dntag	2308.4	2449.2	2300.6	2370.2	1499	1629.8	1454.8	1266.2
AAAGACTAAACCTCCGCGTG	Standard	YML054C::chr13_1b:uptag	333.4	292.8	236.4	209.75	538.6	246.4	179.6	170.8
AAAGAGCGAAACCGTTGGCC	Standard	YDR528W::chr4_8:uptag	3186.8	3376.6	3832	3569.2	5116.4	4589.5	1866.6	1832.2
AAAGAGTTAAACCTCGCTCC	Standard	YBR202W::chr2_4:dntag	56	54.4	60.4	59	67	66	49.2	52.8
AAAGATATAACCCTGTGCCC	Standard	YDL227C::ctrl_1:dntag	3019	3154.2	2868.4	3111.8	2978.5	3027	2387.4	2178
AAAGATTTAACACGCCCGCG	Standard	YDL175C::chr4_2:dntag	605	575.6	743.8	641	929.6	539.6	376.2	365.2
AAAGCAACAACCGCCGTTTG	Standard	YGL087C::chr7_1:dntag	1580.2	1451.6	2041.6	1912.8	3830.8	2631	893.4	1058.4
AAAGCACGAAACCTCTGTCG	Standard	YMR003W::chr13_2:uptag	759.6	700.8	1042.8	766	995.6	687.8	449.6	350.6
AAAGCCTTAAACATCCGTCG	Standard	YDL176W::chr4_2:dntag	1434	1034	1749.2	1588	2982.6	2067.75	1115	1392.4
AAAGCTAAACAGTGCTCCCG	Standard	YDL177C::chr4_2:dntag	93.5	91.2	100.4	100.6	187.4	132.25	91.2	82.6
AAAGGAAGAACCGCGCCTCT	Standard	YDL227C::ctrl_2:uptag	6204.6	6180.4	5929.2	6444.2	5424.8	5762.8	2505.2	2353.8
AAAGGACTAAACGCCGGTCG	Standard	YMR004W::chr00_9:uptag	3039.2	2608.2	2415.2	2303.8	3822.8	3580.8	1415.2	1279.8
AAAGGCACAAACGGCCCTGT	Standard	YGL141W::chr7_2:dntag	1571.8	1559	1626	1821.6	1528.6	1569.8	648.6	655
AAAGGCGTAAACATGCGGCC	Standard	YDL227C::ctrl_2:dntag	6061.8	5987.2	5672.2	6157.2	5604.4	5815.4	4516.6	4469.2
AAAGGTGAAACATGGGTCCC	Standard	YGR007W::chr7_3:dntag	264	224.2	245	256	501.6	346.6	250.8	346.6
AAAGTATGAAACGCGCTTCC	Standard	YBR203W::chr2_4:dntag	1156.8	1427.8	1287.8	1405.75	1754.75	1052	1180.2	890
AAAGTCCGAAACATTCCTCG	Standard	YDL178W::chr4_2:dntag	1429.8	1407	1526.2	1387.4	2494.8	1853.75	1221.8	1056.8
AAAGTGAGAAACGCTGCGCC	Standard	YBR204C::chr2_4:dntag	890	948.4	991.8	1169	804.2	1455.6	796.6	1011
AAAGTTCTAAACCACGTCCG	Standard	YER114C::chr00_5:dntag	781.8	651	958.8	695.8	1178	988.6	473.4	469.6
AAATAACTAACCGCCTGCGT	Standard	YLR049C::chr12_2:uptag	1504.2	1042.4	1415.6	1080.6	1913.4	2310	623.8	399.2
AAATACAAACGGGCCGCCTG	Standard	YGL088W::chr7_1:dntag	50	56.4	54.8	51.4	73.4	56.2	46.8	40.4
AAATACAGAACCGCCTTTCG	Standard	YDL179W::chr4_2:dntag	995.2	793	1034.8	1167.8	1712.2	1228.8	642.6	796.2
AAATACTCAAACGCTGGCCG	Standard	YDL180W::chr4_2:dntag	1189	1050.4	1552.6	1467.4	1026.4	1318	1141	957.6
AAATAGACAACCGCTTCGCG	Standard	YER115C::chr00_5:dntag	1249.4	902.4	1090.2	1226.8	1387	1128	944	1101.8
AAATCACGAAACGCTCTTGC	Standard	YBR205W::chr2_4:dntag	1267	1235	1575.4	1399.75	1992.2	1194	1037.2	1031.2
AAATCAGCAAACGGGCTCCG	Standard	YDL227C::ctrl_3:uptag	2184.4	2394.4	1994	2109	1526.6	1929.4	755.4	625.6
AAATCCCAAACCACTGTGTG	Standard	YGL089C::chr7_1:dntag	1294.4	1476.6	1618.4	1432.2	1938.4	1164.4	958.4	750.4
AAATGAAGAACCGTCCGCCG	Standard	YDL181W::chr4_2:dntag	92.6	100.4	98.6	106.6	114.8	102.4	62	60.6
AAATGAGTAAACGGTCGGCC	Standard	YBR206W::chr2_4:dntag	386.4	331.8	569	388.6	681	405.6	330	304.2
AAATGCCGAAACCATCTCGT	Standard	YDR225W::chr4_5:uptag	72	85.4	80	66.8	97	72	57	52
AAATGTAAACCCGAGGCCCG	Standard	YGL090W::chr7_1:dntag	427	439	602	455.6	1175.2	940.6	335.8	366
AAATGTACCAAACTCCCGGT	Standard	YDR226W::chr4_5:uptag	55	49	54.6	51.8	65.2	54	45.6	41.2
AAATGTCTAAACCCGCAGCG	Standard	YDL227C::ctrl_3:dntag	2530	2568.2	2510.8	2404.6	2076.8	2032	1233.8	957.2
AAATTACCAAACGTCGTCCG	Standard	YMR122C::chr00_9:uptag	1145.2	1058.5	1357	1490	2121.4	1251.2	700.2	869
AAATTCAGAAACGTCTCGCC	Standard	YBR207W::chr2_4:dntag	1150.4	1081.2	1167.2	1160.8	1730.25	1336.2	1025.8	854.8
AAATTCGACAAATCCCGCGT	Standard	YDR227W::chr4_5:uptag	52.6	49	54.2	51.4	60.2	51.4	41.4	40.6
AAATTCGCAAACCCATTCGG	Standard	YGR090W::chr7_4:uptag	43.2	53.8	46	46.8	58.8	45.6	39.4	36.8
AAATTGTCAAACCGAGCTGC	Standard	YDR529C::chr4_8:uptag	118.6	96.4	132.4	122.4	179	104.5	99.2	84.6
AACAAAGGAACCGGCTCTCG	Standard	YDL182W::chr4_2:dntag	1511.8	1083.4	1639.2	1592.2	1584.6	1473.4	1054.6	965.2
AACAAATTAACCGCGCTTCG	Standard	YDL183C::chr4_2:dntag	50.4	49	53.4	52.8	56.2	53.4	43.2	40.4
AACAACCCAAACGTCTAGTG	Standard	YDL184C::chr4_2:dntag	2135.8	2118.25	2409.8	2112.4	2157.2	1340	1707.2	1857.8
AACAACGGAAACGGTGGTCC	Standard	YBR208C::chr2_4:dntag	329	329.6	568.8	436.2	619.5	492.6	364.6	335.6
AACAAGTCAAACGCCTTTCG	Standard	YDL185W::chr4_2:dntag	68.6	76	69.8	68.4	89.2	72.8	56.8	46.2
AACAATACAACCGTCGGCGG	Standard	YMR123W::chr00_9:uptag	919	856.8	893.6	716.4	495.4	807.8	646.4	632.4
AACAATCTAAACGTGCGTCC	Standard	YMR124W::chr00_9:uptag	1980	2104.2	1912.4	1786.6	3405.2	3636.8	1340.4	1159
AACAATGAACGCTTCTCCG	Standard	YDL227C::ctrl_4:uptag	4779	4473.6	4548	4968.4	4281.8	4166.4	2332.6	2243.2
AACACAAACATCTTGCCGGG	Standard	YGL091C::chr7_1:dntag	63.8	78	73	77.6	124.4	66.6	53.2	47.6
AACACACAAACTCCTGGGTG	Standard	YDL186W::chr4_2:dntag	1823.5	1662.6	2519.8	2173.8	2117.4	2036.6	1580	1789.4
AACACCGTAAACCGGACGTG	Standard	YMR179W::chr13_4:uptag	1233.8	1180.8	1074.75	1234.75	650.8	597.25	569.6	772.2
AACACGTAACAACCTGCGGG	Standard	YMR180C::chr13_4:uptag	3248.8	3130.2	2969.4	2773.8	3154.6	3507.2	1536	1565.8
AACACGTTAAACCCGATCTG	Standard	YMR181C::chr00_8:uptag	2972.8	2515	2274.2	2737.8	3903	3308.2	1772	1679.4
AACACTCCAAACCGAGGGTG	Standard	YDL187C::chr4_2:dntag	1496.6	1320	1424.6	1973	3882.6	2243.6	1655.6	1472.2
AACAGAGTAAACTGCCCTCG	Standard	YMR182C::chr13_4:uptag	1572.6	1237.4	1468.8	1367.4	1926	2005	816	720.2
AACAGCCCAACCGGATGGT	Standard	YGL142C::chr7_2:dntag	219.6	266.8	201.8	178	507.4	226	150.8	89
AACAGGTAACAACGCTTCCG	Standard	YMR150C::chr13_4:dntag	69.8	71.2	71.6	70.4	89.4	78.2	62.2	52.4
AACAGTAGAAACTCGTCCCG	Standard	YMR152W::chr13_4:dntag	1978.4	1851.6	1919	2033.2	2449	2315.2	1765	1718.4
AACAGTTAAGAACCTCTCGC	Standard	YMR153W::chr13_4:dntag	1103.2	1035.6	939.4	989	2342.6	1458.8	1230.8	1206.8
AACATAGCAAACTCTCTCGG	Standard	YMR153C-A::chr13_4:dntag	1516.8	1465.2	1227.8	1196	1988.2	1774	1453.8	1663.4
AACATCTCAAACGACGTGCG	Standard	YMR210W::chr13_4:dntag	2235.8	1728.6	2072.2	2153	3235	2562	2120.6	2161
AACATGGTAAACGACTCCC	Standard	YMR211W::chr13_4:dntag	48.8	44.2	46	47.6	57.2	51.2	43.4	40.8
AACATTATACAAGCCCGGCG	Standard	YDL188C::chr4_2:dntag	417.6	432	355	371.6	1032.6	583.4	364	366.4
AACCAACATAGAGCCCTGG	Standard	YGR119C::chr7_4:dntag	160.6	179.2	148.5	126.8	478.4	145	120.2	66.6
AACCAAGTAAACTCTCGTCG	Standard	YMR213W::chr13_4:dntag	77.4	72.2	77.6	75.6	86	77.6	55.6	50.6
AACCACATAAACTCGTCTGG	Standard	YAL028W::chr1_1:uptag	3335.4	2953.2	3108.8	2971	3406.4	2744.8	1294.6	1535.2
AACCACCAACAACTGTGTGT	Standard	YLR050C::chr00_8:uptag	2730.4	2150.4	2553.2	2439.6	3518.2	2633.8	1610	1381.6
AACCAGGGAAACGAGTCCGT	Standard	YLR051C::chr12_2:uptag	56.2	59	59.75	60	67.4	58	49	46.8
AACCAGTTAAACGATCCCGG	Standard	YDL189W::chr4_2:dntag	716.8	508.2	765.6	839.2	1042.2	736.6	509.4	626.6
AACCATCTAAACGACTGTGC	Standard	YAL027W::chr1_1:uptag	4536	4015.6	4154.2	4379	4211.4	4434.4	2054.4	2044.2
AACCATTTAACAACTGCCGG	Standard	YGL092W::chr7_1:dntag	87.8	90.4	81	79.6	311.5	92.2	70.4	51.6
AACCCAAGAAAGCCGGTCGT	Standard	YDR228C::chr4_5:uptag	92	104.8	86.4	88.4	175.4	92	68.4	61.2
AACCCGCGAAACCAAGGTGT	Standard	YDR229W::chr4_5:uptag	1724.2	1621.6	1793	1600.2	2270	1651.2	893.2	880.6
AACCGAGTAAACGTACCGCG	Standard	YAL026C::chr1_1:uptag	539.8	457	781.8	793.4	208.2	375.6	452.4	263.2
AACCGCGCAAACGAAGCTGT	Standard	YLR052W::chr00_8:uptag	59	54.6	61.8	56.4	68	56.6	46.4	42.6
AACCGGAAAGAACGCTCCTG	Standard	YDL190C::chr4_2:dntag	1013.2	1216.2	1656.25	1662.4	756.4	761.2	1034.6	1102
AACCGTCTAAACCATACGTG	Standard	YER022W::chr5_3:dntag	56.6	50.8	56.75	59.25	72.6	58.5	45.8	46.2
AACCTAGAACAAGCCGCGTT	Standard	YLR053C::chr12_2:uptag	972.6	1061.2	832.6	724.8	1197.4	904.8	317.2	247
AACCTCAAAGAACGGCCTGT	Standard	YDR230W::chr4_5:uptag	106.25	114.8	94	93.6	132.6	107	60.6	56.4
AACCTGCTAAACCTTAACGG	Standard	YDL191W::chr4_3:uptag	1444.4	2195	2688	2711.8	2080.6	1644	1130.2	1203.6
AACCTGGCAAACCGTAGACG	Standard	YER023W::chr5_3:dntag	80	76.4	84	82.8	98.8	82.75	65.6	61.6
AACCTGTGAAACCTACCAGT	Standard	YLR054C::chr12_2:uptag	2607.8	2484.2	2373.6	2266.2	3382.6	3407.75	946.4	978.8
AACCTTAGAAACGCACCGGG	Standard	YDL192W::chr4_3:uptag	194	255.6	481.8	434.8	116.4	177.6	182.2	153.8
AACGAAAGAACGTGCCGGTC	Standard	YER024W::chr5_3:dntag	486	505	541.2	556.4	465.6	607.2	370.2	392.2
AACGAACCAAACTGGCGCGT	Standard	YLR055C::chr12_2:uptag	1725.2	1404.8	1226	1422.6	910.25	800.2	859	934
AACGACTAACAACTGTCCGT	Standard	YER025W::chr5_3:dntag	65.3333	67.4	67.6	62	79.4	67.8	52	48.8
AACGACTTAAACGGAGCCCG	Standard	YER077C::chr00_8:dntag	63.6	64.6	58.4	68.75	83.2	58.4	52.2	49.4
AACGAGCGAAACGCATCCGT	Standard	YER078C::chr00_8:dntag	728	462.8	1186.4	1555.4	1249.2	935.6	767.4	1176.2
AACGATCTAAACCGTATCCG	Standard	YER079W::chr5_3:dntag	2271.8	1696.8	2142.25	1914.25	3103	2139	1950.2	2118.6
AACGATGCAAACGATCCTCG	Standard	YER080W::chr5_3:dntag	272	284.8	370.4	340.2	767.4	636.8	282	393.8
AACGCAGAACAAGCTCCGGT	Standard	YLR056W::chr12_2:uptag	185.2	160.8	122.8	128.4	265.2	197	75.2	72.2
AACGCAGGAAACGCAGGTCT	Standard	YLR057W::chr12_2:uptag	431	443.6	462.4	359.4	540	776.2	194.8	158.6
AACGCCCTAAACGAGACGGT	Standard	YHL011C::chr00_10:uptag	75.8	64.8	67.4	60.8	102.4	76.6	57	54.6
AACGCCGCAAACCTGAGAGT	Standard	YLR058C::chr12_2:uptag	1325.8	1324.2	1167	1174.2	1265.4	938.6	661	588.4
AACGCGAGAAACCATTTGCC	Standard	YDR530C::chr4_8:uptag	3029.8	2696.6	3445	3542.6	4535.8	3543.2	1749	1506.6
AACGCGCAACAAATCTCGGG	Standard	YDL193W::chr4_3:uptag	66	79	69.8	67.4	88.5	69.4	47.2	43.8
AACGCGGTAAACCTGTACGA	Standard	YHL010C::chr8_1:uptag	2023	1968	2600.8	1793.2	1901.6	2143.2	1081	849
AACGCTATAAACCCGGTACG	Standard	YHL009C::chr8_1:uptag	1505.4	1478.8	1619.75	1731	2335.4	1258	712.2	697.6
AACGGAACAAGACCCGCTGT	Standard	YGR051C::chr7_4:dntag	1997.2	1729.6	2300.8	2024.2	2684.8	2123.2	1569.8	2001
AACGGAAGAAACTTGCGCCC	Standard	YDR531W::chr4_8:uptag	52.8	54.6	56.6	53.6	68.4	61.4	48	45
AACGGCACAAACTGACCTGG	Standard	YDL194W::chr00_16b:uptag	143.25	135.4	168.2	179.2	180.6	123.25	88.6	80
AACGGCGTAAACCTTCACAG	Standard	YHL008C::chr8_1:uptag	990.6	1094.6	1008.2	691.75	1507.8	1098.4	261.6	191.4
AACGGCTAACAAATTCGCCT	Standard	YDR231C::chr4_5:uptag	49.4	48.4	57	55.2	60.75	53.5	45.6	40.8
AACGGGATAAACCGATTCCG	Standard	YDL195W::chr4_3:uptag	50.6	52	50.5	55.4	62.8	57.75	47.8	43.8
AACGGGTGAAACCAATCCCT	Standard	YGL143C::chr7_2:dntag	67	64.2	63.6	64.4	75.2	62	45	40.6
AACGGTGAACAAATGGTCCC	Standard	YDR532C::chr4_8:uptag	86.2	102	106.8	92.4	149.6	88.6	79	76.4
AACGGTGGAAACCTGAGTAC	Standard	YHL043W::chr8_1:dntag	1260.6	889.4	1545.4	1334.4	2408.4	1564.8	819.4	935.6
AACGTAGAACAAGGGCGCTC	Standard	YHL042W::chr8_1:dntag	1567.6	1249.6	1575.2	1889.8	2858	2382.2	1306.2	1448.8
AACGTATGAAACCTCGACCG	Standard	YHL041W::chr8_1:dntag	1163.8	1268.6	1208.25	1390.4	1365	1677	920.4	1255
AACGTCCTAAACGCAAGCGG	Standard	YHL040C::chr8_1:dntag	999	807	1293.2	1102.8	1568.2	836.8	798	867.6
AACGTCTAACAACACGCGGG	Standard	YHR020W::chr8_1:dntag	87	101.4	94	92.4	165.6	104.8	68	54.8
AACGTGACAAACCTACTCGG	Standard	YHR021C::chr8_1:dntag	59.4	90.4	195.8	221.6	140.2	192.2	102.2	75
AACGTGTTAAACGGGAACCC	Standard	YBR209W::chr2_4:dntag	2412	1652.6	1675.8	1994.8	2322.25	860.5	1946.6	1877
AACTACAGAAACTTCGCTCG	Standard	YHR022C::chr8_1:dntag	92.4	107.2	91.2	90.4	145.8	111.2	76.2	69.4
AACTACGGAAACCGCGCAGT	Standard	YGR052W::chr7_4:dntag	900.2	797.4	996.2	895.6	1655.4	1546.2	887.6	965
AACTACGTCAAAGCACCGGG	Standard	YPL252C::chr16_1:uptag	103.4	107.2	105	101.8	194.2	113.6	75.2	53.6
AACTAGAAAGACGGCGCGTT	Standard	YPL250C::chr16_1:uptag	1283	1389.2	1189.4	1289.6	1869.6	809	441.2	463.2
AACTAGACAAACTTGCCTCG	Standard	YPL249C::chr16_1:uptag	2517.2	2359.2	2216.8	2261.6	5652.25	4801.8	1306	1333.6
AACTATCGAAACCGCCAGGG	Standard	YDL196W::chr4_3:uptag	201.75	223	181.8	180.6	564.2	213.2	147	85.4
AACTATTAACAAGGTGGCCC	Standard	YDR533C::chr4_8:uptag	109.4	113.2	134.6	133.4	191.6	168.4	76.8	77
AACTCAAACACCATGTCGCG	Standard	YGR057C::chr7_4:dntag	79.8	71.2	84.2	73	107.4	75.4	62.4	58.4
AACTCAATAAAGCGCCCTGG	Standard	YDL227C::ctrl_4:dntag	2665	2433.8	2476.2	2549.2	2402.8	2216.2	1905.2	1793.4
AACTCACAACAAGGTTCCGG	Standard	YDL197C::chr4_3:uptag	100	129	102.2	93.8	153.25	107.4	65.8	64.4
AACTCACGAAACTAGCGTCG	Standard	YPL192C::chr16_1:uptag	2603.6	2594	2350.2	1775.8	3263.2	3505.4	1716.8	1578.8
AACTCATGCAAAGACCTTCG	Standard	YDL198C::chr4_3:uptag	60	53	63	55.6	74	64.2	47.2	43
AACTCCGAACAACAGCGGGT	Standard	YLR059C::chr12_2:uptag	219	258.4	197	184.6	603.8	230	170.4	86.4
AACTCGAAAGAAGCCTCCGG	Standard	YDL199C::chr4_3:uptag	1878.6	1373.2	1722	1684.6	1615.4	1785.6	892.8	882.4
AACTCGACAAACTATGCGCG	Standard	YPL191C::chr16_1:uptag	52.8	47.6	48.8	50.4	65.4	60.2	43.6	41.8
AACTCTTCAAACATACGGCC	Standard	YPL190C::chr16_1:uptag	82	81	84.6	80	215.6	79.6	62.2	54.8
AACTGATAACAAGTCGTCCC	Standard	YPL229W::chr16_1:dntag	1336	1429.8	1529.25	1196.5	2261	1969.75	1407.8	1344.6
AACTGATCCAAAGACGGGCC	Standard	YDR534C::chr4_8:uptag	3054.2	3385.6	3089.25	3072.6	4195.2	3420.6	1592	1489
AACTGGCAACAACATGCGCG	Standard	YDL200C::chr4_3:uptag	995.8	580	714.25	1006.4	611.2	664.8	399.2	406
AACTGGTCAAACGAAGTCCC	Standard	YBR210W::chr2_4:dntag	2407.6	1930.4	2525	2700.6	3015.4	3349.4	2421.4	2509
AACTGTGCAAACACCACGTT	Standard	YLR060W::chr12_2:uptag	82	77	70.4	69.4	99.5	73.4	55	48
AACTGTTTAACCCAAAGCCG	Standard	YGL093W::chr7_1:dntag	209	224.8	182	164.2	643.4	205.6	146.2	79.8
AACTTACGAAACTACCGCG	Standard	YPL228W::chr16_1:dntag	59.4	60.4	59.4	57	63.2	67.4	46.2	45.6
AACTTAGCAAACTTAGCGCC	Standard	YBR211C::chr2_4:dntag	66.8	64.4	77.4	69.6	76.25	75.8	58.6	51.8
AACTTATACCAAAGCCGCTG	Standard	YDL201W::chr4_3:uptag	396.75	440.8	399	394.4	834	416	284.6	187.2
AACTTCGTAAACAGACGCCG	Standard	YPL227C::chr16_1:dntag	563	544.6	691	711.8	1520.8	977.8	489.6	476.8
AACTTTCGACAACGACACGG	Standard	YNL322C::chr14_1:uptag	246.4	167.4	184.8	185.4	346.8	262.4	147.2	155.4
AAGAAATTAATCTCCTCCGG	Standard	YGL094C::chr7_1:dntag	848	620.5	1009	820.8	1086.4	1030.6	867	859.8
AAGAAGTAAAGCGCCGCCCT	Standard	YDR232W::chr4_5:uptag	89.25	88.4	91	85.6	132.4	91.6	61.8	57.2
AAGAATGCAAAGCCGTCCCG	Standard	YGL095C::chr7_1:dntag	113.6	124	105	104.2	447	115	101.8	62.2
AAGACACAAAGCGGCGCGTT	Standard	YLR061W::chr12_2:uptag	131.2	112.2	124	112.25	166.2	112.8	87.8	69.6
AAGACACTAAACTCTGCTCG	Standard	YNL321W::chr14_1:uptag	3095.4	2658.6	2997.4	2942.4	4199.75	3616.2	1731	1675
AAGACAGTAAAGCCGGTTCC	Standard	YBR212W::chr2_4:dntag	1676.6	1390	1501.4	1436.8	2045.4	2137.2	1179	1198
AAGACCTAACAAGTGTGCCG	Standard	YNL320W::chr14_1:uptag	1431.4	1600.6	1445.25	1295.2	2581.2	2092.6	717.2	595.6
AAGACGGCAAACGCATCTCG	Standard	YNL263C::chr14_1:uptag	67.4	56.2	65	60.8	80.2	73.2	51	46.4
AAGACTTGAAACGCGACTCC	Standard	YNL262W::chr14_1:uptag	49.8	47.8	54.8	54.4	62	54.8	44	43.8
AAGAGAAACGGAGCGCCCTT	Standard	YGR053C::chr00_14:dntag	1159.6	1322.6	1179.2	1293.4	1869	2037	916.2	876.4
AAGAGACCAAAGCCTGCTCG	Standard	YDL202W::chr4_3:uptag	254.2	316	222	221	678	264.6	187	102.4
AAGAGCCTAAACGCTACGCG	Standard	YNL261W::chr14_1:uptag	79.4	72.8	77.2	68.4	108	76.4	60.8	57
AAGAGGATAAAGTGGTCTCC	Standard	YBR213W::chr2_4:dntag	1192	1238.8	1630.75	1681.6	1777.6	1794	1329	1416.6
AAGAGGGAACAAGTTGCCTT	Standard	YGL144C::chr7_2:dntag	1977.5	1878.4	2443.6	2544.8	2548.6	3087.6	2122.2	2061.6
AAGAGGTGAAACGCCTATCC	Standard	YBR214W::chr2_4:dntag	487.6	417.2	337.2	330.25	1273.25	881.6	215.4	317.8
AAGAGTGTAAACTGACTGCC	Standard	YNL260C::chr00_8:uptag	54.8	50.2	56.2	58.6	65.4	53	43.8	42.6
AAGAGTTCAAAGACGGTGCC	Standard	YBR215W::chr2_4:dntag	230.2	234	260.4	263.6	329.25	248	213.6	211
AAGATAACAATCGTGCCCGC	Standard	YBR216C::chr2_4:dntag	83.8	84.4	91	90.4	138.5	114.8	59.4	69.6
AAGATCCGAAACTACGTTCC	Standard	YNL307C::chr14_1:dntag	62.4	56	60.2	60.6	73.2	68.4	46.2	47
AAGATCGCAAACTATTGGCC	Standard	YDR437W::chr4_8:dntag	78	74.2	78.2	82.8	108	95.8	63.4	62.2
AAGATCGGATACGCTGGCCT	Standard	YHR006W::chr00_10:dntag	1951.6	1587.6	1914.2	2036	2780.8	1980.6	1545.4	1574
AAGATGCAACAATGCCGCCG	Standard	YGL096W::chr7_1:dntag	856.4	751.6	627.2	581	1211	1136	607.2	487.4
AAGATTCCAAACTCATTCGG	Standard	YGL097W::chr7_1/chr00_17a:dntag	47.2	45.6	50.2	45.4	60.4	45.8	38.4	36.6
AAGCAACGAAAGCGCGTGTC	Standard	YNL306W::chr14_1:dntag	77.6	77.8	77	73.8	115	81.4	56	50.8
AAGCAAGCAAAGGCCGCGTT	Standard	YGL145W::chr7_2:dntag	101.2	103.4	84.4	91.6	178.6	103.6	71.8	51.2
AAGCACATAAAGCTCTCTCG	Standard	YNL305C::chr14_1:dntag	68.8	60.6	71	61	97.4	81.6	50.6	50.6
AAGCACCTAAACGTACTTCG	Standard	YNL304W::chr14_1:dntag	3323.8	2543.4	2222.6	2280.4	4305.4	3371.2	2668	2731.6
AAGCCAAACCAATGCCGGTG	Standard	YGR091W::chr7_4:uptag	210.6	253.6	223.6	173	566.6	190.6	144	79.4
AAGCCAATAAAGGCCCGTCG	Standard	YGL098W::chr7_2:uptag	94.4	114.2	89.6	101.6	163.8	102	73.2	50
AAGCCAGAACAATCTTTCCG	Standard	YGL099W::chr7_2:uptag	101.2	107.4	111.4	87.4	245.4	91	79.2	58.8
AAGCCAGCAAACTGTACTCG	Standard	YJL196C::chr10_1:uptag	168.8	186.4	161.6	142	367.75	151	116.4	67.2
AAGCCCACAAACGTATCTGG	Standard	YDL203C::chr4_3:uptag	1308.2	1071.8	1292.4	1330	1741.5	1187.8	801.2	709.6
AAGCCGCAACAACGACTGGT	Standard	YLR062C::chr12_2:uptag	675	626.4	648.2	649.8	1002.25	605.2	323.8	233.8
AAGCCGTGAAACGACACCGT	Standard	YJL194W::chr10_1:uptag	80.2	75.8	74.8	80.4	106	91	58.6	58.4
AAGCGAAGAAAGGCTCCCTC	Standard	YDR438W::chr4_8:dntag	3132.6	2930.2	2904.4	3169.6	4810.4	4738.2	3223.6	3293
AAGCGACGAAACTTACGTGC	Standard	YJL195C::chr10_1:uptag	56	52.6	55	50.5	71	58.25	44	44.8
AAGCGCGAACAACCAGTCGT	Standard	YJL193W::chr10_1:uptag	417	377.2	411.75	399.5	1093	454.8	237.2	191.6
AAGCGCGTAAACCGTGATAC	Standard	YJL144W::chr10_1:uptag	2613.4	2286.4	2330	2921.4	4494.8	3759.4	1587	1724.2
AAGCGGGCAAACGATATGCT	Standard	YDR233C::chr4_5:uptag	1973.6	2025.8	2564.4	2381.8	2653.2	1360.4	814.8	950.6
AAGCGTAGAAACTGGAGCCC	Standard	YBR217W::chr2_4:dntag	2270.4	1981.6	2715.2	2841.8	2514.6	2823.8	2383.8	2044.8
AAGCGTCAACAACACCGTTT	Standard	YGR054W::chr7_4:dntag	67.4	75.4	80	74	102	74	54.8	51.6
AAGCGTCTAAACGGGAGATC	Standard	YJL143W::chr10_1:uptag	61.8	54.8	67	64	76.2	63.2	49.4	45.8
AAGCTAAGAAAGTCCCGCGC	Standard	YBR218C::chr2_4:dntag	1454.2	1291.4	1696.2	1640.4	2490.4	2674.2	1681	1911
AAGCTCCGAAACGGCACAGT	Standard	YLR063W::chr12_2:uptag	188.8	223	167.4	165.8	557	195.4	126.6	90
AAGCTCTAACAACTACGGCG	Standard	YJL142C::chr10_1:uptag	805.4	680.6	661.25	659.75	974	897.8	321.2	304.8
AAGCTGGGAAACGCACACCT	Standard	YDR234W::chr4_5:uptag	156.2	148.8	171	168.8	248.4	198.8	131.6	132
AAGCTGTCAAACGATCAGGC	Standard	YBR219C::chr2_4:dntag	384.4	293	352.2	401	598.25	469.25	298.2	302.6
AAGCTTACAGAAGGTGAGAT	Standard	YLR062C::chr12_2:dntag	222.2	270.2	250.8	277.6	291.4	275.6	221	179.8
AAGGACAAAGAGCGCGTCTC	Standard	YJL141C::chr00_14:uptag	566.8	707	714.6	835.2	328.6	517.2	235.8	299
AAGGACAGAAAGGGCTTCCC	Standard	YGR008C::chr7_3:dntag	91	99	102.2	91.25	189	116	73.2	69
AAGGAGTGAAACTTAGGTAC	Standard	YBR220C::chr2_4:dntag	1553.8	1221.8	1484.2	1723.4	1820	2060.8	1303.6	1335.6
AAGGATGAACAATTTGGCCC	Standard	YGR045C::chr7_4:dntag	1384	1467.2	1225	1317.4	2824.2	1913	1318.8	1406.4
AAGGATGCAAACTGCGAGCC	Standard	YDR439W::chr4_8:dntag	193.25	135.4	223	208.4	364.6	160.2	149.2	201
AAGGATTAACACACGCCCGG	Standard	YDL204W::chr4_3:uptag	760.2	615.2	827	673.8	973.2	811.2	413.4	306
AAGGCCCAACAACCTAGTGT	Standard	YDR235W::chr4_5:uptag	80.2	88.2	79.8	81.6	122.4	77.8	51.6	44.2
AAGGCGGCAAACGGTTACAC	Standard	YBR221C::chr2_4:dntag	814.2	680.4	875.8	973.4	1348.75	962.4	1179.4	1161.8
AAGGGACTAAAGAGCTGTCT	Standard	YLR064W::chr12_2:uptag	60.8	63.2	62	69.5	85	64.2	47.6	47.2
AAGGGAGCAAACTTTATCCG	Standard	YGL101W::chr7_2:uptag	45.8	43.2	46.6	46	55.4	50	39.4	38.4
AAGGGCACAAAGATCCCGCT	Standard	YGL146C::chr7_2:dntag	2106.5	1634.2	2069.4	2455.6	2866.4	2829.2	1992.8	1601.4
AAGGGCCGAAACGTAACGCT	Standard	YLR065C::chr12_2:uptag	52	48.6	54.4	54.4	66	56	41.4	41.6
AAGGGTCTAAACGTCACACC	Standard	YJL189W::chr10_1:dntag	62.6	62.2	65.8	63.2	105.8	71.8	54.8	49
AAGGTAAACTTAACCCGCCG	Standard	YDL205C::chr4_3:uptag	63.8	68.4	69	74.2	103.2	67.8	50.4	48.2
AAGGTACGAAAGACTCTGCC	Standard	YJL188C::chr10_1:dntag	54.2	48.2	56.2	51	68.4	52.25	46	44.6
AAGGTCCCAAACGCTAGACG	Standard	YJL187C::chr10_1:dntag	1703	1759.25	1965	1955.6	2663.8	2110.2	1296.4	1226.4
AAGGTCGTAAACGTCGAGAC	Standard	YJL138C::chr10_1:dntag	1120.6	720.4	775.6	1072.8	760.5	1913.8	988.8	1076.2
AAGGTTCAAAGAGACCGCC	Standard	YDR455C::chr4_8:dntag	957	798	678	955	1234.4	489.6	856.2	915
AAGTACCGAAAGACCTGTCC	Standard	YJL136C::chr00_14:dntag	563	381.2	588.4	781.2	1079	413.8	466.8	678
AAGTACGAACACACCTCGGT	Standard	YJL135W::chr10_1:dntag	3795	3189.4	3109.4	3182.2	5212.75	5258.2	3730.4	3461.8
AAGTATCAACACACTGTCCG	Standard	YJL086C::chr10_2:uptag	79.8	82	84	81.8	129.4	78.2	69.6	62.6
AAGTATGTAAAGAGGTGCCC	Standard	YBR222C::chr2_4:dntag	301.4	355.4	362	428.6	976	762.6	402	369.8
AAGTATTTAACATCCCGGCC	Standard	YDR440W::chr4_8:dntag	701	887.8	1219.6	1307.4	1700.2	934.4	736.6	762.4
AAGTCACAACACAGCGCGTG	Standard	YJL084C::chr10_2:uptag	334.8	340.6	313.25	269	753.2	342	255.6	129.2
AAGTCATTAAAGATGCGCCC	Standard	YDR441C::chr4_8:dntag	1274	1228.6	1064.4	1113	1897	1175	1073.4	1296.8
AAGTCCCAACAAGAGGGCCT	Standard	YGL147C::chr7_2:dntag	169.6	164.2	172.2	175	358	174.6	133	124.2
AAGTCCGTAAACTCGAACCG	Standard	YJL083W::chr10_2:uptag	3132.8	3339	3534.4	3501.4	4145.4	3919.8	1938	1937.6
AAGTCCTGAAACGGGAGTAC	Standard	YJL082W::chr10_2:uptag	3360.4	2745.4	3248.6	3319.6	5052.2	3067.6	1638.6	1874.2
AAGTCGATAAACTGGTACGC	Standard	YJL032W::chr10_2:uptag	59.5	64	73.75	73.4	112.4	90.2	63.4	60.6
AAGTCTAGCAAATACCTCGC	Standard	YJL031C::chr10_2:uptag	53	48.8	48.8	48.8	69.8	55.8	44.6	45
AAGTCTATAAAGATCGGCTC	Standard	YBR223C::chr2_4:dntag	594.2	454.4	482	565.6	1150.6	918.8	669.4	815.4
AAGTCTGGAAACGTGACGAC	Standard	YJL030W::chr10_2:uptag	3474.25	3477.6	4158.2	3512.4	3509	4789.2	2180	1876
AAGTCTTTAACAGGCAAGCC	Standard	YDR442W::chr4_8:dntag	75.5	91.2	85.8	82.4	115.4	89.8	64.2	57.4
AAGTGAAACCAGAGCCCGCT	Standard	YDR236C::chr4_5:uptag	221.8	269.4	205	189.6	578.2	253	166.6	95.4
AAGTGGCAACAAGCAGGCTC	Standard	YDR443C::chr4_8:dntag	195.8	228.2	175.8	171	484	225.4	134	89.2
AAGTGGTCAAACTACGACGC	Standard	YJL078C::chr00_15:dntag	1652.2	1518.5	2216	2096.4	3057	2514.8	1817.2	1901.4
AAGTGTCCAAACTAGACGCC	Standard	YJL077C::chr10_2:dntag	2181.6	1925.6	2120.4	2457.8	2595.2	2745.6	1335.2	1247
AAGTGTGTAAAGACAGCGCC	Standard	YJL076W::chr10_2:dntag	128.8	123.8	87.6	93.8	408.6	111.2	75.2	51.8
AAGTTATTAAAGGACCCGCC	Standard	YDR446W::chr4_8:dntag	1579	1289.2	1459	1329.8	1809	1248.8	822.4	811
AAGTTCAGAAAGATGTCCGC	Standard	YBR224W::chr2_4:dntag	217	209	259.2	229	402.4	250	135.6	164.4
AAGTTCGCAAACGTGTAGAC	Standard	YJL075C::chr10_2:dntag	72.5	64.6	75.2	67.2	90	81	55.8	52
AAGTTCGTAAAGACACCCC	Standard	YIL004C::chr9_1:uptag	47.6	54.4	49.6	45.8	61.6	52.8	45.4	38.6
AAGTTGATAAAGCACTCCCG	Standard	YDL206W::chr4_3:uptag	52.6	53.8	54.2	53.8	75.6	60	46	44.8
AAGTTGTAACACCAAGCCCG	Standard	YDL207W::chr4_3:uptag	218	244.8	177.4	174.4	642	213.8	156.4	80.6
AAGTTTAACCACAACCTGGC	Standard	YGR055W::chr7_4:dntag	365.4	379.8	376.4	308.25	732.8	332.6	258.6	183
AAGTTTACAAAGCACGCGCC	Standard	YBR225W::chr2_4:dntag	368	299.2	466.4	481.2	642.8	345.4	310.2	308.4
AAGTTTCAACAAGCCATCCG	Standard	YGL102C::chr7_2:uptag	194	253.2	193.4	153.4	656.8	203.2	166.2	82.4
AAGTTTGGAAAGACACCTCC	Standard	YDR447C::chr4_8:dntag	930.25	735.6	835	906.4	866.2	1072.6	853.6	711.2
AATAACATAACGCCCTGTCG	Standard	YIL005W::chr9_1:uptag	89.6	85.8	92.2	91.2	146.6	100.2	69.4	62
AATAAGCGAAAGCCTGGGCC	Standard	YGR009C::chr7_3:dntag	136	144	114.4	111.6	423.8	139.8	95.6	64.6
AATAAGTCAAAGCGTCTCCC	Standard	YBR226C::chr2_4:dntag	522.4	349.2	556.6	562.4	1061.5	720.2	679.8	623.2
AATAATTGAAAGCGGGCGTC	Standard	YDR448W::chr4_8:dntag	89.4	102	98.4	111.8	173.8	164.4	80.4	71
AATACAAACCGCACCGTGGG	Standard	YDL208W::chr4_3:uptag	103.8	121.4	115.2	106.8	190.5	97.4	68.8	64.4
AATACAAGAACGGCGCGTCC	Standard	YIL006W::chr9_1:uptag	1585	1313	1431.8	1643.4	2809.75	1477.8	767.8	833.8
AATACACAAAGCTCGGTCC	Standard	YIL007C::chr9_1:uptag	227.4	217.4	336.2	306.6	310	272.2	156.2	133
AATACAGCAAAGGCGTGCCC	Standard	YDR449C::chr4_8:dntag	187.6	194.4	169	161.6	482.6	199.8	140.2	87.8
AATACCCTAAACTCCGAGGT	Standard	YLR066W::chr12_2:uptag	62.2	63.4	59.6	59.2	74	65.4	49.8	46
AATACGATAAAGGGTTCGCC	Standard	YBR227C::chr2_4:dntag	2057.6	1954.8	2134.6	2170	3031.25	2901.8	1789.8	2008
AATACGCGAAACTCCAGTCG	Standard	YIL055C::chr9_1:uptag	319.2	363.8	528.6	591.8	533.25	475	208.2	302.6
AATACGGTAAACTCGGGACC	Standard	YIL056W::chr9_1:uptag	4043.8	3878.4	4413.4	4606	4665.4	4340.8	2249.8	2303.8
AATAGACAAAGTCCTCCCGG	Standard	YDL209C::chr4_3:uptag	52.4	56.2	55	50.4	58.8	51.4	42.6	40.4
AATAGACTAAAGCGTGTGCC	Standard	YIL057C::chr9_1:uptag	1095.8	907.4	1193	1338	1800.25	1561	515.6	538.6
AATAGAGGAAAGGTGCTCCC	Standard	YDR450W::chr4_8:dntag	71.8	77.8	71	66.8	78.5	75.4	56	52.2
AATAGATCAAAGGCTCTGCC	Standard	YDR451C::chr4_8:dntag	1720	1558.6	1638	1835	2385.8	2295	1549.4	1389.2
AATAGCGTAAACTCTGACCC	Standard	YIL010W::chr9_1:dntag	1928.6	1992.4	2309.8	1967.4	5114	3739	2362.4	2417.2
AATAGGTACACATGCTCCC	Standard	YBR228W::chr2_4:dntag	247.2	289.8	311.6	303.2	784.6	706.6	262.6	242.8
AATAGTATAAAGTCGCGCCC	Standard	YIL011W::chr9_1:dntag	1429.4	1209.4	497	762.4	2344.8	2312.6	1324	1433.4
AATAGTCGAAACTGCTAGGC	Standard	YIL012W::chr9_1:dntag	1882.6	1754.6	2042.4	2247	2610.8	1715	1244	1558.4
AATAGTTGAACGGACCTCCC	Standard	YDR452W::chr4_8:dntag	268.8	255.8	318.4	285.8	636.5	458.4	327.2	394
AATATGCAACACATTGGCCG	Standard	YGL103W::chr7_2:uptag	73.4	80.6	66.2	75.6	157	70.6	60.6	53.6
AATATGGTAAAGCATCCCGC	Standard	YDR453C::chr4_8:dntag	729	603.4	767	698.8	1395.4	1373.2	834.6	947.4
AATCACTTAAAGCAGGGCCG	Standard	YGL104C::chr7_2:uptag	496.4	586.6	693.4	551	689.8	639.6	237.6	147.6
AATCAGCCAAAGATGTGGGC	Standard	YGR010W::chr7_3:dntag	550.6	507.8	412.8	467.8	1158.4	567.6	414.6	277.4
AATCAGCCATAATGAGGTC	Standard	YPR183W::chr16_5:uptag	202.6	229.4	181.8	159.6	460.4	187	132.8	72
AATCAGGGAAAGATCCTTCG	Standard	YGL105W::chr7_2:uptag	42.6	75.6	47.2	66.2	70.4	78.2	38.8	37.2
AATCATACAAAGTGTGCCGC	Standard	YBR229C::chr2_4:dntag	1599.6	1354.8	1450.4	1331.2	1756	2161.4	1200.8	1369.6
AATCATCACAAAGTTCGCC	Standard	YGR056W::chr7_4:dntag	64.2	63.8	72.4	64.2	103.8	66.8	58	52.6
AATCATTTAACATGGCGGCC	Standard	YGR011W::chr7_3/chr00_12:dntag	54.4	50.6	56.8	63	65.6	55	47.6	45
AATCCAAGAAAGTTGCCGCC	Standard	YGR012W::chr7_3:dntag	617	911	795	644.8	1283.6	846.2	203	136.6
AATCCCATAAAGCAGTTCCG	Standard	YGL107C::chr7_2:uptag	53.2	64.4	56	50.6	98	54.6	50	40.8
AATCCCGCAAACTACAGTGG	Standard	YDL210W::chr4_3:uptag	223.75	239.8	237	199	307.6	305.6	118	109.8
AATCCCTAACAAGCGACGGG	Standard	YDL211C::chr4_3:uptag	315.8	307.6	300	355.6	524.6	367	172.8	230.2
AATCCCTGAAACTAGACTCG	Standard	YIL060W::chr9_1:dntag	4121.8	3621.75	3894.4	3554.2	4206.2	3429.2	2180.2	2356.8
AATCGCCCAAACTAATTCGG	Standard	YGL108C::chr7_2:uptag	141.6	114.4	134.6	103.6	532	305.6	76.8	58.4
AATCGGCTAAACTATACCCG	Standard	YIL061C::chr9_1:dntag	64.6	62.4	61.6	67.4	85	66.8	51.6	48.2
AATCGGTGAAACGGTCAGAC	Standard	YIL062C::chr9_1:dntag	115.4	122.6	135.4	117	201.4	120	89.4	88.2
AATCTATCAAAGCGACGGCC	Standard	YBR230C::chr2_4:dntag	191.2	217.2	169.8	174.6	599.8	201	154	89.2
AATCTCATAAAGCCCACGGG	Standard	YGL109W::chr7_2:uptag	343	362.2	360.4	271	859.8	440.4	166.2	109.2
AATCTCCAACAAGACTTCGG	Standard	YDL212W::chr4_3:uptag	81.2	81.6	81	83.6	123	86.6	61.6	54.8
AATCTCCTGACTGGCAGAC	Standard	YBR231C::chr2_4:dntag	54.6	53.2	60.8	61	75	61	49.8	46
AATGAACTAAAGTCCGGTCC	Standard	YBR232C::chr00_8:dntag	1927.4	1831.4	1679.8	1864.2	2775.6	2029.8	1417.6	1541
AATGAAGCAAAGTGCCCTGC	Standard	YGR013W::chr7_3:dntag	57.4	53.6	63.8	60.2	79	63.6	52	44
AATGACATAAAGTGCTGCCC	Standard	YDR454C::chr4_8:dntag	69.8	73.4	67.8	70	89.4	78.6	59.6	54.8
AATGACGGAAAGATTCGTGC	Standard	YBR233W::chr2_4:dntag	2257	1950	2341	2822.2	3744.6	2808	2171.2	2436
AATGAGTAACACCCGACCGT	Standard	YIL063C::chr9_1:dntag	103.4	105.2	96.6	111.4	139.75	126.6	77.2	68.8
AATGCAGCAAAGATTCTCCC	Standard	YGR014W::chr7_3:dntag	1321.4	1541.4	1781.6	1849.8	3699.2	2473.8	1809.4	1450
AATGCCCTAAACTATCACGG	Standard	YDL213C::chr4_3:uptag	68.4	62.2	75	66.6	95.6	65.2	52.8	50
AATGCGCCACAAAGCGAGTG	Standard	YDL214C::chr4_3:uptag	263.25	317.2	223.4	218.8	638.2	264.6	184.8	102.2
AATGCGCGAAACGGCGATAC	Standard	YEL016C::chr5_2:dntag	492	396	193.2	178.2	784.8	69.6	575	609.6
AATGCGTCAAACTGGATACC	Standard	YBR234C::chr2_4:dntag	60.6	56.2	67	63	77.25	65.6	46.4	47.4
AATGGAAGAAATCCTCCCTC	Standard	YGR015C::chr7_3:dntag	1080.25	870.8	1080.8	1208.2	2054	1261.2	675	837
AATGGCGTAAACTGATAGCC	Standard	YBR235W::chr2_4:dntag	1868.6	1554.75	1978	1925.6	2114.8	2550.6	1774.6	1881.4
AATGGCTGAAACTGTCTCAC	Standard	YBR236C::chr2_4:dntag	60.2	56.4	65.4	66.6	74	59.2	50.4	49
AATGGGAAAGCAATCGCCCG	Standard	YGR092W::chr00_14:uptag	694	353.8	602.2	333	596.6	380	320.6	391.6
AATGGGAGAAAGCCGACTCT	Standard	YDR237W::chr4_5:uptag	69.8	69.6	64.8	71.8	83.2	73.2	52.2	43.2
AATGGTGCAAACTGGTGACA	Standard	YLR172C::chr12_3:uptag	920.5	936.2	816.4	768.4	1149.8	1235.2	502.4	417
AATGTCACAAAGCCATCTCG	Standard	YDL215C::chr4_3:uptag	476	471.6	526.6	485	937	390.8	356.6	268.8
AATGTGCCAAAGACCCAGCG	Standard	YGL110C::chr7_2:uptag	309.25	356.2	247.4	226.2	773	298.8	207.4	108.2
AATGTGGCAAACTGTCGAGA	Standard	YNL097C::chr00_16b:uptag	3761.6	3448.6	3885.5	4077.2	2438	2184	2243	2222.4
AATGTTCGACAAGTAACGCG	Standard	YEL017C-A::chr5_2:dntag	174.8	259.2	399.6	462.4	81.6	203.6	449.6	324.4
AATGTTGAACCAAATGCCCG	Standard	YGR093W::chr00_14:uptag	595.5	532.6	452.2	453.4	1110.4	934.4	234.6	152.4
AATGTTGTAAAGAGCAGCCC	Standard	YDR456W::chr4_8:dntag	198	195	163.2	138	542.2	164.2	124.8	74
AATTAAATAACTCGCCGCCG	Standard	YDL217C::chr4_3:uptag	122.6	153.8	154.4	130.2	276	130	86.4	73.2
AATTAACCAAAGTGCCTGCC	Standard	YGR016W::chr7_3:dntag	1972.8	1868	2199.6	2085.6	2806.2	2141.4	1479.2	1384.6
AATTACCTAAAGCGCACTCG	Standard	YEL063C::chr5_2:dntag	65	65.4	127.2	80.8	85.25	66	52	48.2
AATTACGGAAAGCGAGTTCG	Standard	YEL064C::chr5_2:dntag	85.6	75	134.5	106.8	71.4	78.8	56.8	53.8
AATTACTAACACCGACTGCG	Standard	YEL065W::chr5_2:dntag	300.4	477.6	639.25	603.6	702.6	274.4	206.2	372.8
AATTAGGTAAAGCTCGACCC	Standard	YBR237W::chr2_4:dntag	115	105.6	129.4	125.8	135.75	115.2	111.8	112.6
AATTATAGAAATCGCGGCCC	Standard	YDR457W::chr4_8:dntag	59.25	55.2	56.2	55.6	81.6	53	42	38
AATTCAGTAAAGGACGTGCC	Standard	YBR238C::chr2_4:dntag	1772.4	1476.8	1718.2	1783.2	1855	827.8	1589.2	1603.8
AATTCATGCAACACCGCAGG	Standard	YGR058W::chr7_4:dntag	517.8	389	547.8	500.4	1013	543.4	239.4	238.8
AATTCGCTAAAGACCGACCG	Standard	YEL066W::chr5_2:dntag	826	761.6	880.8	1067.4	1340	1154.6	932.2	789.8
AATTCTCAACAATGACCCGG	Standard	YGL111W::chr7_2:uptag	43	50	39.8	38.8	59.4	47	38.8	32.4
AATTCTCCAAAGAGCACGCG	Standard	YDL218W::chr4_3:uptag	906.5	933.6	999	988.8	1023.8	864.6	475.4	411.4
AATTGAGAACACCGATGCCG	Standard	YDL219W::chr4_3:uptag	2134.6	2360.6	3020.4	2367.8	2813.6	3099.6	1131.2	1107
AATTGCTTAAAGAGGGACCC	Standard	YGR017W::chr7_3:dntag	1761.6	1631.6	2196	2477.8	2151.8	1757.6	1427.8	1487.6
AATTGGACAAAGGACTCTCC	Standard	YDR458C::chr4_8:dntag	62	60.4	67.2	62.8	73.8	63.6	42.4	44.2
AATTGTCGAAAGACCATGCC	Standard	YDR459C::chr4_8:dntag	1914.8	1698	1823.4	1294.2	2117.5	2858.6	1492.2	1672.6
AATTTAGGAAAGCTGCACCC	Standard	YGR018C::chr7_3/chr00_12:dntag	2021	1651.2	1801	2024.4	3408	1864	1734.6	1756.6
AATTTGACAACAGAGCCTCC	Standard	YDR460W::chr4_8:dntag	208.25	279.4	189.5	175.4	598.8	219.4	145	83
AATTTGCTAAAGCGAAGCCC	Standard	YGR019W::chr7_3:dntag	2236.8	1948.6	2456	2172.4	3415.6	1162.2	1632.4	1673.6
ACAAACCGAAAGGCGTGGCT	Standard	YDR238C::chr4_5:uptag	73.2	65.8	82.2	76.8	108	86.5	57.2	56.4
ACAAACTAAAGGTCGTCCCG	Standard	YLL021W::chr12_1:uptag	79.4	95.2	85.4	77.8	116.6	86.6	60.4	59.2
ACAAAGAGAACGGCCCTCGT	Standard	YLR067C::chr12_2:uptag	86.4	77.8	84.8	89	128	96.4	60.8	59.6
ACAAAGCCAAAGGGTCGGTC	Standard	YDR461W::chr00_17a:dntag	105.6	109.6	114.4	106.6	194.2	98.6	82.8	69.2
ACAACACAAATGGCGCGGCT	Standard	YDR239C::chr4_5:uptag	2823.75	2812.6	3653.2	3629.4	3999.2	4022.75	1782.6	1641.6
ACAACCTAACACCATTTGGG	Standard	YGL112C::chr7_2:uptag	50.75	48.2	49.6	55.4	67.8	52.2	40.2	38.8
ACAACGCAACACCGGAGGTT	Standard	YLR068W::chr12_2:uptag	196.8	220.2	171	154.75	446.4	179.75	125.2	86.4
ACAACTACAAATCCTTGCGG	Standard	YDL220C::chr4_3:uptag	59.5	64.6	65.6	66.8	84.2	65	59.8	49.8
ACAACTCTAAATACGGCTCG	Standard	YLL023C::chr12_1:uptag	106.2	110.2	110.6	100	190	98	103.4	98.4
ACAAGAAGAACGTCTCCGCG	Standard	YLL024C::chr12_1:uptag	337	349	423.5	356	624	377	219.4	260.4
ACAAGACCAAATCGGCGTCG	Standard	YLR006C::chr12_1:uptag	1468.6	1352.75	1297.6	1128.8	1478	1624.6	597.2	480
ACAAGCGAACACCCGTTAGG	Standard	YGR059W::chr7_4:dntag	2450.8	2267.8	2386.6	2802.75	3699.25	2947	2242.4	2403.4
ACAAGCGCAAATACTGCCGG	Standard	YDL221W::chr4_3:uptag	67.6	76.8	76.2	77	119.6	72.6	63.6	50.2
ACAAGTCAACACCGCGAGGT	Standard	YLR007W::chr12_1:uptag	67	75	69.8	61.2	86.6	65.75	45.8	45.4
ACAATAACACCTATGCGGGT	Standard	YGR060W::chr7_4:dntag	85.8	105	84.8	79.6667	128	95.8	62.4	53.8
ACAATACCAAATGCGCCGGG	Standard	YGL113W::chr7_2:uptag	165	156	143.6	135	404.2	147.4	96.8	71.6
ACAATCAAAGTACCGGCCTG	Standard	YGR061C::chr7_4:dntag	2821.2	2673.6	2666.4	2542.8	3479.8	3143.8	2128.8	2215.6
ACAATCATAAATCGTCGGCC	Standard	YBR239C::chr2_4:dntag	645.2	654.6	792.8	782.8	747	635	483.6	401
ACAATCGTTGAGAATCGGAT	Standard	YNL021W::chr14_4:dntag	1392.2	1862.4	2358.2	2249.5	2571.8	1711.4	1682.8	1664.2
ACAATCTAACACGACCTGGT	Standard	YLR008C::chr12_1:uptag	58.6	61.4	58	60.6	81	66.6	51.4	44
ACAATCTGAAATGCGCGGC	Standard	YBR240C::chr2_4:dntag	453.4	471	829	739.4	806.8	645.4	497.2	561
ACAATGGAACACCGCGCATG	Standard	YDL222C::chr4_3:uptag	767.2	740.4	1022	694.8	1594.2	1080.4	614.6	449.6
ACAATGGTAAATAGCGTCCC	Standard	YBR241C::chr2_4:dntag	1802	1798.4	2154.2	1936.8	3477.75	2815.4	1864.8	1820.8
ACAATTCGACAGAACCGTGG	Standard	YLR009W::chr12_1:uptag	229.8	268.4	179.6	172	578.8	199.2	146.4	88.4
ACAATTTCAAAGCCTGACCG	Standard	YGL114W::chr7_2:uptag	1166.2	1053.2	1582	1261.2	1721.8	1275.2	556.2	544.8
ACACAAACACCTACTGGTTG	Standard	YGR062C::chr7_4:dntag	84	88.6	86.4	81.4	104	89.5	61.4	53.8
ACACAAAGAAGTTTCCCTCG	Standard	YDL223C::chr4_3:uptag	442.2	365.6	1083.8	898.2	772.4	675	315.2	193.4
ACACACACAACACGGGTTTG	Standard	YGR063C::chr00_14:dntag	133.4	149.8	143.4	137.5	230.333	144	97	82.4
ACACACTCAAAGCATTTCGG	Standard	YDL224C::chr4_3:uptag	3735.4	3474.2	4033.2	4027	4611.6	3400.8	1662.8	1720.8
ACACAGTAACACATTGTCGC	Standard	YLL029W::chr12_1:dntag	129	163.4	154.2	163.5	216.2	127.5	106.4	90.8
ACACATATAAATCTCGCGGC	Standard	YLL030C::chr00_8:dntag	54.6	55.8	55	56.75	73.6	63	53.2	48
ACACATCGAAAGGACTGTCG	Standard	YLL031C::chr12_1:dntag	72	65.6	71	72.6	98.75	80.6	58.4	54.8
ACACCACGAAAGGAGTCGCT	Standard	YLL032C::chr12_1:dntag	1082.8	965.2	1225	985.25	1324.4	1169.25	832.2	1023
ACACCATAACACGAGGGCGT	Standard	YLR014C::chr12_1:dntag	703	642.2	955.75	745	746.4	596	306	356.2
ACACCATTAAAGGTACGCGC	Standard	YLR015W::chr12_1:dntag	678	623	500.6	676.2	318	933.4	588.4	732
ACACCCGCAAAGACGTAGGT	Standard	YLR016C::chr12_1:dntag	3724.4	3476.4	3697.4	3661	4679.75	3884.6	4026.8	3779
ACACCGAAATAACTCTCGTG	Standard	YLR017W::chr12_1:dntag	1921.2	1654.2	1855	1670.75	2592.8	2278.5	2138.8	1769.2
ACACCGTCAAAGAGCCAGGT	Standard	YLR069C::chr12_2:uptag	133.8	181.5	117.6	115.2	279.8	142.6	93.8	63.8
ACACCTCTAAAGATCAGCGG	Standard	YOR324C::chr15_4:uptag	1699.2	1583.75	1228.8	1272	1956.6	2021.2	720.2	663.6
ACACCTTAACAATGCACGGG	Standard	YDL225W::chr4_3:uptag	87.4	94.4	84.6	85.2	141.2	97.2	64.6	55
ACACGAAACACGATCCGGGT	Standard	YGR064W::chr7_4:dntag	131.2	125	145.6	137.2	139.4	133	80.4	62.4
ACACGAACACAATCCGGGTG	Standard	YOR325W::chr15_4:uptag	2347.4	2310	2373.6	2043	2266.5	2488.8	1141	919.4
ACACGACCAAAGGATCTTCG	Standard	YOR326W::chr15_4:uptag	75.4	75.8	79.2	72	110.5	73.6	59.4	53.2
ACACGAGAACACGAGTCCTG	Standard	YOR327C::chr15_4:uptag	345.8	340.6	410.8	498	397	409.4	160	164.8
ACACGATTAAAGCCATTGCC	Standard	YDR462W::chr4_8:dntag	142.8	161.75	141.4	125	531.5	146.4	117.6	68
ACACGCCAACAATGAGTCGG	Standard	YOR375C::chr15_4:uptag	891.6	688	636.4	685.2	1262.75	989	540.4	462.2
ACACGCTGAAAGAGTACGCC	Standard	YOR376W::chr15_4:uptag	257.8	178.6	174.2	169.4	753.333	443.8	86.8	74
ACACGGCTAAAGACTCTACG	Standard	YOR377W::chr15_4:uptag	3087	2940.8	2487.2	2730.8	3616.4	2893.4	1405.4	1306.6
ACACGGGAACAATCACTCGG	Standard	YOR378W::chr15_4:uptag	4047	3893.25	3575.2	3313	4113.5	3587.8	1634	1527.6
ACACGTAGAAAGGCTAGGCC	Standard	YOR331C::chr15_4:dntag	58.6	65.2	67.4	67.6	84	76.6	52	50.2
ACACTAATAAATGCGCGTCC	Standard	YOR332W::chr15_4:dntag	57.6	53.2	60.6	62	74	65.4	51.8	51
ACACTAGAACACCGTACTGT	Standard	YOR333C::chr15_4:dntag	2641.75	2499.5	2730.2	2614.4	3473.4	2779	2283.4	2406.2
ACACTAGCAAAGGGACTTCC	Standard	YBR242W::chr2_4:dntag	630.2	450	681	911.5	1917.6	1144.8	939.4	858.4
ACACTATTAAAGCTGCTCCG	Standard	YOR334W::chr15_4:dntag	165.2	118.4	168.2	177.75	170.8	153	128.4	139.8
ACACTCGAACAATGATGCCG	Standard	YOR047C::chr15_1:uptag	3539.8	3660.4	3892.4	4104.4	5868.6	4920.2	1984	1957.6
ACACTCTGAAAGACGCGACG	Standard	YOR048C::chr15_1:uptag	78.75	71.2	78.2	84.5	104.5	89.75	58	50.2
ACACTGCGAAAGATACGTCC	Standard	YOR049C::chr15_1:uptag	314.8	311.8	181.4	250.8	390.333	497.6	160	138.4
ACACTTATACACACACGGTG	Standard	YOR050C::chr15_1:uptag	1054.6	855.6	1044	770.75	1275.6	1134.5	441.8	344.4
ACACTTCAACAATCGTAGCG	Standard	YOR003W::chr15_1:dntag	66.8	61.6	65.6	59.2	79.8	65	51	51.4
ACACTTCCAAAGATACTGCG	Standard	YOR004W::chr15_1:dntag	71.6	65.8	79.5	70	94.8	78.2	60	52.4
ACAGAAATAACTTTGGCGCG	Standard	YDL226C::chr4_3:uptag	695.5	539.8	1545	1070	1030.8	224	489	591.4
ACAGAACTAAATCGGGTCCC	Standard	YBR243C::chr2_4:dntag	93.8	89.8	99.6	107.8	166.6	109.8	82.8	67.4
ACAGACCCAAAGGATTGTCC	Standard	YDR463W::chr4_8:dntag	328.4	187.8	287.6	385.8	317.25	170.25	249.4	280.8
ACAGACTAACACGCACTGGG	Standard	YOR005C::chr15_1:dntag	775.4	616.2	656	459.6	1121.6	1033.5	613	344.4
ACAGAGAGAATGCGTCGCC	Standard	YOR006C::chr15_1:dntag	121.667	96.2	98	94.2	140.8	131.6	96.4	80.2
ACAGAGCAACACGTACCGTT	Standard	YOR054C::chr15_1:dntag	408.2	314.6	396.25	558.8	1053.8	835.4	260	236.4
ACAGATAAAGTACCTCCCGG	Standard	YGR065C::chr7_4:dntag	57.2	58.8	56.2	58	77.4	61	44.4	42
ACAGATACAAATGTCGCCCG	Standard	YOR055W::chr15_1:dntag	2049.4	2106	1880.2	2052.4	2734.6	3091.2	1541	1807.6
ACAGATATACAGTTATGGCG	Standard	YJR067C::chr00_12:uptag	73.2	80.4	73.6	73.6	80.8	69.25	67	63
ACAGATGGAAAGGCAGTTCT	Standard	YDR240C::chr4_5:uptag	65	66.6	67.8	74	84.2	71.75	58	55.8
ACAGATTTAACCCACACGGG	Standard	YDL227C::chr4_3:uptag	1949.8	1808.6	2013.75	2015	2232.2	1746.6	1191	1082.2
ACAGCAACAAGTCGAGCCGT	Standard	YOR056C::chr15_1:dntag	208.8	263.2	189.2	167.8	524.75	214.2	158	90.6
ACAGCATAACACCTGACGGG	Standard	YOR057W::chr15_1:dntag	136.6	154.5	143.6	131	260.8	134.4	85	66.8
ACAGCGGGAAAGAGCTATCC	Standard	YBR244W::chr2_4:dntag	577.2	509	613.2	592.4	1696.4	676	422.4	522.4
ACAGCTAAATAAGCCTCCGT	Standard	YLR070C::chr12_2:uptag	2789.4	2375.4	2472.8	2668.5	4495.4	3032	1108	1131.2
ACAGCTAGAAAGGTGACGCC	Standard	YHR057C::chr8_2:uptag	197.8	196.4	143.6	164	315.8	328.6	126.6	126.6
ACAGCTTTAACATGAACCCG	Standard	YDL229W::chr4_3:uptag	1177.5	1089.8	1462.4	1184.5	1620	1850.2	392.4	418.6
ACAGGAACAGAACTCCCTTT	Standard	YGR066C::chr7_4:dntag	2232.8	1963.4	2019.2	2511	4193.6	3180.4	1879.4	1950.2
ACAGGAGTAAAGTACGCCCG	Standard	YHR105W::chr8_2:uptag	1929.6	1787.4	1751	1586.6	3252	2558.5	896.4	791.6
ACAGGCCCAAAGCACTAGGT	Standard	YDR241W::chr4_5:uptag	588	515	740.4	707.6	715.6	469.4	310.4	327.6
ACAGGCGAACAATGTACCCG	Standard	YHR106W::chr8_2:uptag	1032.4	1028.75	1567.6	1189	2261.4	1232	547.4	449.6
ACAGGCGGAAAGATATTCT	Standard	YLR071C::chr12_2:uptag	60.2	56.6	62	57.6	70.8	62	47.2	44.8
ACAGGTATAAAGGTAGTGCC	Standard	YHR107C::chr8_2:uptag	58.8	63.6	55.2	54	65	64.8	47	43.6
ACAGGTCAACACAAGTCCGT	Standard	YHR108W::chr8_2:uptag	835.4	804.6	782.4	1070	934.4	1229.8	523.6	512
ACAGGTCGAAAGATGACTCC	Standard	YHR061C::chr8_2:dntag	888.8	899	568.4	1045.8	1914.4	1380.2	993.2	926.6
ACAGTAAACACGCGACCGTT	Standard	YGR067C::chr7_4:dntag	2082.4	1766.75	1809.6	1546	2236.6	2638.6	1652.8	1851.4
ACAGTACGAAAGGTAGGTCC	Standard	YHR062C::chr8_2:dntag	104.667	102.4	92.25	95.4	161.6	106.8	67.6	64
ACAGTAGAACACGCGAGCTG	Standard	YGR188C::chr00_10:dntag	146.5	175.25	172.75	156.2	540.2	145.6	117	118
ACAGTCGGAAAGACGTACCC	Standard	YHR064C::chr00_8:dntag	70.6	81.8	70	71.4	87	71.2	51.4	48.6
ACAGTCTTAAAGGTCCACAC	Standard	YHR112C::chr8_2:dntag	1072.4	802.8	1100	1060	1435.6	1272.2	719.2	714.2
ACAGTGCCAAAGCCAATCGG	Standard	YGL115W::chr7_2:uptag	286.4	341.4	265.8	238.4	722.6	286.4	212.4	99.6
ACAGTTAGAAAGTAGCGGCC	Standard	YHR113W::chr8_2:dntag	2781.2	2034	2897.4	2990.6	2112.2	2389.4	1226.4	1277.6
ACAGTTCTAAAGCGGCACAC	Standard	YHR114W::chr8_2:dntag	1970.6	1692.8	1856.2	1738.6	3675.75	2460.25	1639.4	1702
ACAGTTGCACACAGAACGCG	Standard	YHR115C::chr8_2:dntag	450.8	495.4	466.75	412.4	843	422.8	252.2	157
ACATAAAGAGATTTCCGCCC	Standard	YGR068C::chr7_4:dntag	1389.4	1496	1618.4	1455.6	2118.8	2154	985.4	1117
ACATAAGTAAATGCCGTCCC	Standard	YBR245C::chr2_4:dntag	1277	1203.6	1675.2	1522.4	1271.25	1054.8	1056.2	1041.4
ACATACAACACCGCTTAGGG	Standard	YGR069W::chr7_4:dntag	1501.8	1129.67	1973	1604.33	1681.4	1538.2	1279.8	1022.8
ACATACATAAATGGCTGCCC	Standard	YDR464W::chr4_8:dntag	73.2	75	70.2	70.6	89.6	75.5	56	55
ACATACCAACAGCACGGGTG	Standard	YGR070W::chr7_4:dntag	238.8	305.5	214	196.333	607.2	269	173	96
ACATACCGAAAGCTCTAGCG	Standard	YBR288C::chr00_16a:uptag	1366	1716	2020.6	1812.8	2955.25	1761.5	734.4	714
ACATACTCAAAGGTCAGCCG	Standard	YBR289W::chr00_16a:uptag	191.2	209.4	162.8	159.8	583.2	198.8	151.2	85.6
ACATAGAACACCTGAGCCGG	Standard	YGR071C::chr7_4:dntag	916.4	625.2	857.25	850.8	902.6	952.6	671	650
ACATAGGAACACGGAGCCCT	Standard	YLR072W::chr12_2:uptag	1142	1113.2	1103.6	1162.4	1097.5	1240.2	446	385.4
ACATATCTAAAGGCCATGCC	Standard	YDR465C::chr4_8:dntag	687	647.8	750.6	647	1028.5	579.4	310.6	317.2
ACATCACCAAAGGTTACTCG	Standard	YBR290W::chr00_1:uptag	3859.2	3583	4196.2	4034.75	4609.8	4386.8	1824	1950.4
ACATCAGTAAAGTAGCTCCC	Standard	YBR291C::chr00_1:uptag	2348.8	1936	1896	2299.8	2216.2	2270	1047.8	1022.4
ACATCATGCAACCAAGCGTG	Standard	YDL230W::chr4_3:uptag	580.25	410.4	677.8	561.5	1254.8	677.75	303.2	264
ACATCCGGCAACCAAATTGT	Standard	YGL148W::chr7_2:dntag	549.8	292.6	862.8	665.2	507.6	350.4	803.4	871.8
ACATCGACAAAGTAGGCGCG	Standard	YCR067C::chr00_16a:uptag	1115	1258.6	1443.4	1491	2424.8	1392.25	747.8	689.8
ACATCGCAACACAGACGGGT	Standard	YCR068W::chr00_1:uptag	333.4	340.6	283.2	256.6	703.4	291	245.4	140
ACATCGCTAAAGCACATCGG	Standard	YCR069W::chr00_16a:uptag	3384.8	3164.8	3987.2	3770.4	5291.6	3734	1569.6	1674.8
ACATCTAAATAAGTGCCGCG	Standard	YCR071C::chr00_1:uptag	89.6	91.2	143.4	118.2	110.25	85	69.6	67.2
ACATCTGAACACCACAGGGT	Standard	YLR073C::chr12_2:uptag	216.2	226.6	201	198	553.4	235.4	167	100
ACATCTTGAAAGGATACGCC	Standard	YBR246W::chr2_4:dntag	967.8	834.8	1211.75	1239.4	916.4	996.8	892.4	800
ACATGAGAACACGGCAGCGT	Standard	YBR296C::chr00_1:dntag	161	192.4	147	129.8	450.4	180.8	109	67.6
ACATGCAGAAAGTAGTCCGC	Standard	YBR297W::chr00_1:dntag	71.2	67.8	70.6	66.8	90.4	74.2	54.2	50.6
ACATGGATAAAGTCAGCCCG	Standard	YDL231C::chr4_3:uptag	488.2	485.4	553.2	586	801.2	488.5	244.4	226.6
ACATGGCGAAAGCACCACGT	Standard	YLR074C::chr12_2:uptag	131	144.8	127.5	115	316.8	125.6	82.4	71
ACATGGTAACAATGGATCGC	Standard	YBR247C::chr2_4:dntag	48.4	48.6	48.6	51.6	58	55.2	41.2	40.4
ACATTACAACACCTCATGGG	Standard	YDL232W::chr4_3:uptag	69.8	61.6	59.4	62.8	96.6	68	48	45.8
ACATTACTAAAGGTGCGACC	Standard	YBR298C::chr00_1:dntag	125.8	112.6	122.4	123.8	205.5	197.8	108.6	116.2
ACATTCTCAAAGGAAGCTCC	Standard	YDR466W::chr4_8:dntag	1983.8	1514.2	2071	1850.2	2536.8	2055	1043.6	1132.6
ACATTGCACCAACACTAGGG	Standard	YDL233W::chr4_3:uptag	2275.5	1901.2	2625.8	2342	3159.8	2403.6	1177.8	1142.4
ACATTGGAACACACATGCCG	Standard	YDL234C::chr4_3:uptag	228.25	250.4	189.6	175.6	659.2	237.4	162.6	87.6
ACATTGGCAAAGCGAACTCC	Standard	YDR467C::chr4_8:dntag	3397.2	3211.4	3215.4	3023.4	3854.8	4044	2038.4	2310.8
ACATTGTTAAAGCTGTGGCC	Standard	YDR468C::chr4_8:dntag	68	67.4	74	71.2	91.75	83.6	58.6	56.6
ACATTTAACGAATACCGGCG	Standard	YBR300C::chr00_1:dntag	1621	1270.75	1625.8	1823.5	2531	1773.6	1117.6	1246.6
ACATTTAGAACACTACCGCG	Standard	YCR086W::chr00_1:dntag	71.2	63.6	66.75	60	96.6	76	58	52
ACATTTATACACATCGGCGC	Standard	YCR087C-A::chr00_1:dntag	1459.6	1236.6	1045.4	1057.2	1305	1218.4	910.2	931
ACATTTCTAACACCGTCAGG	Standard	YGR072W::chr7_4:dntag	729.6	616.2	647	920.8	740.2	1225.4	391	555.8
ACCAAAGGAAATGGCCTCCG	Standard	YGR094W::chr7_4:uptag	51.8	52.6	49.4	48.2	61.6	51.4	39.4	39.4
ACCAACAGAACACGTCGTTT	Standard	YCR087W::chr00_1:dntag	698.8	660.5	533.667	594.2	1569	622	404.6	444.8
ACCAACATAAATTCCCGTGG	Standard	YGL116W::chr7_2:uptag	51	50.6	55	56	63.4	53	41.4	39.6
ACCAACCAACACGTATGGGT	Standard	YLR075W::chr12_2:uptag	102	92.6	91.25	71	107.25	75.2	57.4	51.4
ACCAACCCAAAGTACGTGTG	Standard	YCR088W::chr00_16a:dntag	3075.2	2695.75	3225.25	2930	5160.2	3571.8	2716.4	2823.6
ACCAAGAACACGTTACGGGT	Standard	YPL132W::chr00_8:uptag	63.8	68.8	60.4	59.2	75.6	57.4	48.8	42.6
ACCAAGACAACACTCTGTGG	Standard	YPL131W::chr00_8:uptag	63.4	68	65	64.4	76	70.2	52.2	46
ACCAATGCAAATAGGCGGCC	Standard	YGR020C::chr7_3:dntag	57.8	61.4	59.2	67	75	70	51	43.8
ACCACAAGAACAGCGGCGTT	Standard	YGR073C::chr7_4:dntag	258.8	311.4	237.4	220.25	635.2	257.6	185.6	96.6
ACCACACAAAGTCAGTGCG	Standard	YPL129W::chr16_2:uptag	235.8	250.4	202	185	625.4	232.2	174.2	91
ACCACACAACAGAGGCGGTT	Standard	YLR076C::chr12_2:uptag	229.2	292.6	202.6	207.333	584.25	234	161.6	83.2
ACCACACGAAAGTATGTCCG	Standard	YPL130W::chr16_2:uptag	1608.4	1400.2	1419.6	1558.6	1304.4	1588.75	983.4	676.8
ACCACCGGAAAGCAGCTAGT	Standard	YLR077W::chr12_2:uptag	595.6	452	400	380.8	986.667	512	319.2	230.2
ACCACGGAACACGAACTGTG	Standard	YPL168W::chr16_2:dntag	568.6	430.4	534.2	562	852	320.2	350.4	313.6
ACCACTATAAAGTTACCGCG	Standard	YPL167C::chr16_2:dntag	1639.6	1761.2	1277.25	1186.5	2584	1980	1589.4	1506
ACCAGAAACACGGGAGCCTT	Standard	YGR074W::chr7_4:dntag	85.2	98.6	79.8	94.6	133	89.4	65.8	55.4
ACCAGAACAGAAGGGCGCTT	Standard	YGR075C::chr7_4:dntag	153.6	177.4	131.2	129.6	345	159.2	107.6	73
ACCAGATAACACGTAGTCCG	Standard	YPL166W::chr16_2:dntag	1453.5	1460.8	1405.4	1457.2	1956.6	1858.8	1123.4	1169.6
ACCAGCACAAAGTCTACTGT	Standard	YPL111W::chr16_2:dntag	1330.6	1179.2	1117.2	1252.8	2977.4	1839	1449.8	1371.6
ACCAGCCAACACGGGATAGT	Standard	YLR078C::chr12_2:uptag	213.2	259.2	169	170.4	475.6	189.2	128.6	70.8
ACCAGCCTAAAGCGTCAGAG	Standard	YPL110C::chr16_2:dntag	252.4	295.6	231.25	224.2	674.8	256.4	188.2	104.4
ACCAGGAGAAAGTGACCCTC	Standard	YBR248C::chr2_4:dntag	71.8	67	75.4	69.6	76	72	55.2	50
ACCAGGGTAAAGCCGTACAC	Standard	YPL109C::chr16_2:dntag	1803.6	1748.4	1588.25	1477.4	3093.75	1846	1532	1509.8
ACCAGTGGAAAGGAACGTCC	Standard	YBR249C::chr2_4:dntag	404.4	484.4	480.6	322.4	1243.4	762.2	306.2	208.4
ACCATAAACACTAGGTCCTG	Standard	YGR076C::chr7_4:dntag	55.4	58	58	66.25	73.8	59.6	48.4	49.6
ACCATAACAAGTATTCCCGG	Standard	YDL235C::chr4_3:uptag	59	58.6	61	59	74	57.2	49.6	45.2
ACCATAAGAACACGGTCGCG	Standard	YNL204C::chr14_2:uptag	179.6	161.25	226	167.4	274.6	191.8	129.2	115.4
ACCATACTAAAGTCGCATCG	Standard	YNL202W::chr14_2:uptag	3156.4	3191	2802.25	2841.6	3691.75	3781	2201.6	1946.6
ACCATCAGAAATACGTGCC	Standard	YBR250W::chr2_4:dntag	96.6	92.6	104	107.2	204.2	104.2	96.6	84.2
ACCATGCAACAGAACTGCGG	Standard	YDL236W::chr4_3:uptag	341.4	355	312.4	284.6	807	327.6	261.6	155.8
ACCATGCCAAAGGAATGCCG	Standard	YGR095C::chr7_4:uptag	159.2	189.4	150.6	129.6	490.6	160.2	122.8	62.4
ACCATGTAACAAGTCATCGC	Standard	YGR077C::chr7_4:dntag	938.6	831.4	824.6	653.6	1124.5	1047	793.8	645.8
ACCATTAAATACACCGGCGT	Standard	YGR078C::chr7_4:dntag	348.6	326.5	1333.8	1026.2	452.6	220.2	155.2	236.6
ACCATTTGAAAGAGTGAGCC	Standard	YDR469W::chr4_8:dntag	235.2	218	295.2	290.4	522	337	188.4	179.8
ACCCACGTAAAGCTATGACG	Standard	YNL203C::chr14_2:uptag	99.4	86.4	86.8	84.6	142.8	94.5	59.2	55.2
ACCCATACAAACGTGATCGG	Standard	YNL201C::chr14_2:uptag	632	596	684.6	635.5	748.4	689.2	330.2	366
ACCCATGAACACAAGTTGCG	Standard	YDL237W::chr4_3:uptag	83.4	71.6	81.4	73	119.2	80.6	55.4	47.4
ACCCGAGGAAAGAGGCCATT	Standard	YGL149W::chr7_2:dntag	603.25	434.8	627.6	537.5	1463	1061.4	478.6	757.8
ACCCGATAAAGTTAATCGC	Standard	YBR251W::chr2_4:dntag	69.8	66.4	66.8	64.4	97.4	78.8	55.8	58
ACCCGATTAAAGATTCACCG	Standard	YDL238C::chr4_3:uptag	1006	828.8	1274.6	1225	1285.6	928.2	419.4	436
ACCCGCGTACAAAGATGATG	Standard	YNL240C::chr14_2:dntag	96.2	115	121	111.75	142	124.6	62.8	65.8
ACCCGCTAACACAGTAGAGG	Standard	YNL239W::chr14_2:dntag	569	511	500.75	433.75	1424.8	651	377.4	272.8
ACCCGCTGAAAGCAGAACGT	Standard	YLR079W::chr12_2:uptag	67	74	64.2	115	103.25	69.4	69.8	73.8
ACCCGGTGAAACTTCCATAA	Standard	YLR173W::chr12_3:uptag	64.8	75.2	67.6	84.6	112.4	80.25	57.4	54.4
ACCCGTCTAAAGCTCTATGA	Standard	YNL238W::chr14_2:dntag	497.8	474	863.75	625	811.4	569.6	424.8	577.4
ACCCTAGAACACGACGAGGT	Standard	YNL237W::chr14_2:dntag	82.25	84.8	84.2	75.6	121.4	110.2	55.6	53.8
ACCCTATGAAAGTAAGCTCC	Standard	YBR252W::chr2_4:dntag	56.2	57.2	60.4	57.8	78.8	64.8	46	46.2
ACCCTCCAACAGAGTAGAGT	Standard	YNL181W::chr14_2:dntag	255.4	303.4	221.6	202.8	601.4	248.6	177.8	103.8
ACCCTGAGAAAGTGGAATCC	Standard	YDR470C::chr4_8:dntag	58.4	51	59	58	74.8	59.25	48.6	46.8
ACCCTGCTAAAGAAGACCGG	Standard	YDL239C::chr4_3:uptag	2482.8	1960.2	2356.8	2788.4	3647.6	2727.2	1204.4	1292.4
ACCCTTACAAAGAGTTACCG	Standard	YNL180C::chr14_2:dntag	334.2	506	1907	2191.75	884.25	189.8	657.6	601
ACCCTTCAACACAATAGGTG	Standard	YDL240W::chr4_3:uptag	119.4	118.6	138.6	135.75	139	109.8	75.6	68.2
ACCCTTCGACACGAGAATAG	Standard	YGR079W::chr7_4:dntag	63.2	71.5	64.5	65	83.4	69.75	46.2	43.2
ACCGAAACAACCCGAGGTGT	Standard	YLR080W::chr12_2:uptag	1229.8	1466	1647	1419.5	1469.2	1891.6	471.6	459.6
ACCGAAAGGGAAATCCGTGC	Standard	YDR471W::chr4_8:dntag	1394.75	1190.5	1341	1714.5	1524.8	1603	1737.4	1934.6
ACCGAACGAAATATCCCGTG	Standard	YNL179C::chr14_2:dntag	2018.8	2189.25	1864.8	2135.8	2705	2916.2	1615	1882
ACCGAAGTAAATACGTGTCC	Standard	YNL178W::chr14_2:dntag	71.8	72.8	75.8	71	106	71.2	59.4	54.4
ACCGACCGAAAGGTACACGT	Standard	YJL004C::chr00_13:uptag	4202.4	4114.4	4436.5	4404	4979.25	4310	1767.4	1841
ACCGACGCAAAGTCAACGTG	Standard	YJL003W::chr00_13:uptag	78.8	81.6	71.6	71.6	95.4	79.6	60.2	57.8
ACCGACTAACACACGATGGG	Standard	YJL002C::chr00_13:uptag	144.6	142	125	114.2	277.6	132.6	76.8	62.4
ACCGACTTAAAGAGCTTACC	Standard	YJL001W::chr00_13:uptag	90	79.8	86.5	77.2	115.75	95	69.6	67.4
ACCGAGACAAATAGTCGCCG	Standard	YJR055W::chr00_13:uptag	77.8	78.8	80.6	85.2	88.5	93.25	69	59.6
ACCGATTGAAAGTACACTCC	Standard	YJR056C::chr00_13:uptag	64.2	57	54.8	56.2	80.5	65.6	51.6	49
ACCGCAAAGGAGAGACCGTT	Standard	YLR081W::chr12_2:uptag	3236.6	2840	2779.4	2874.75	3652	3343.8	1371.2	1241.2
ACCGCAATAAATATGGCCGC	Standard	YDR472W::chr4_8:dntag	61.75	55.2	64	57.2	68.8	58.8	51.6	44.4
ACCGCCAGAAAGTCTAGTAC	Standard	YJR018W::chr00_13:dntag	164.4	183.8	150.75	128.4	341	160.2	106	72
ACCGCCGTAAAGGAGTACAC	Standard	YJR017C::chr00_13:dntag	61.25	63.5	58.6	76.8	75.6	69.5	51	50.8
ACCGCGAAATAACATCCGTG	Standard	YJR020W::chr00_13:dntag	2436.2	1966.2	1704.6	1863	2337.2	2785	1936.6	2044.6
ACCGCGCAACAGAATCAGGT	Standard	YLR082C::chr12_2:uptag	254.4	286	289.2	290.8	488.4	326.2	219	218
ACCGCGCCAAAGGAGCATAT	Standard	YDR147W::chr4_5:dntag	187.8	204.2	167.6	149.75	487	177.8	142.6	81
ACCGCGTTAAAGCTACTACA	Standard	YJR019C::chr00_13:dntag	76	82.6	70.8	79.6	101.25	78	60.6	58.6
ACCGCTACAAAGTGATACCG	Standard	YIL108W::chr9_2:uptag	1272.8	1176.4	1378.8	1392.8	1960	2025	623.2	601.4
ACCGCTCGAAAGCTAGATAC	Standard	YIL109C::chr9_2:uptag	69.25	73.8	79	77	96	85.8	67.4	65.8
ACCGGAGAAACTACGCCGT	Standard	YAL025C::chr1_1:uptag	58.8	57.4	60.8	68	75.4	55.6	49	44
ACCGGCAGAAAGTTACAGCC	Standard	YBR253W::chr2_4:dntag	192	205.2	153.8	156.75	563.2	200	139.4	81.4
ACCGGCGTAAAGCGTCTACA	Standard	YIL111W::chr9_2:uptag	3484.2	3344	2642.4	2674.4	4196.2	3772.8	2246.2	2139.2
ACCGGCTAACACGATAGACG	Standard	YEL001C::chr5_2:uptag	1424.2	1254.4	826.6	1206.6	1261	1293.5	423	603.4
ACCGGGATAAATACAGCCCT	Standard	YDR148C::chr4_5:dntag	184.4	216	159.6	156	552.2	198.25	137.2	82
ACCGTAAAGGCCAACACGTT	Standard	YLR083C::chr12_2:uptag	1228.8	899.2	1295.8	1123.6	1722	1089.8	455	343
ACCGTAAGAAACCGTATGCC	Standard	YEL002C::chr5_2:uptag	54	55.4	56.6	73.4	65.75	71.2	46.4	46.6
ACCGTACTAAAGCACCATGT	Standard	YGR080W::chr7_4:dntag	1665.6	1710.25	1864.67	1961.6	3306.8	2816.2	2119.2	2192.8
ACCGTAGCAAAGTGGACGAC	Standard	YEL003W::chr5_2:uptag	156.4	288	202.6	289.8	315.2	329	216.8	221.4
ACCGTATAACACTAGAGCCG	Standard	YEL004W::chr5_2:uptag	767.75	491.2	454.8	526	742.2	493	256.6	237.2
ACCGTCACAAAGTTAGACCG	Standard	YEL039C::chr5_2:uptag	1358	1166.2	1473.4	1643.4	786	2219.75	1052.4	1212.6
ACCGTCCAACACTGAGAGAG	Standard	YEL040W::chr5_2:uptag	216.6	259.2	251.6	218.4	624.4	237.4	167.4	104.8
ACCGTCTTAAAGTTACGACC	Standard	YEL041W::chr5_2:uptag	205.4	274.5	413.2	463.2	397.2	354.2	193.2	218.8
ACCGTGAAATAACCCACTGT	Standard	YLR084C::chr12_2:uptag	1739.6	1419.25	1574	1487.25	1992.4	1673	723.8	502.2
ACCGTGATAGAACACTGACC	Standard	YEL042W::chr5_2:uptag	1284.25	593.8	891.4	972.5	837.2	474	525.4	409.6
ACCGTGTAACAGAAATGTCG	Standard	YER001W::chr5_2:uptag	1750.2	2021.2	2073.6	2322.2	2506.4	371.8	952.4	737.4
ACCGTGTCAAAGGACGACCA	Standard	YER002W::chr5_2:uptag	350.2	381.4	539.8	450.2	201.2	463.4	354.4	180.4
ACCGTTCCAACTATAAGCG	Standard	YER049W::chr5_3:uptag	1305.6	959.4	1328.6	1314.4	2489.2	1408.2	865.2	832.2
ACCTAAGCAAATATCGCGCT	Standard	YLR085C::chr12_2:uptag	1321.4	1831.8	2278.2	2279	1480.4	1391.4	944.8	988.8
ACCTAAGTAAACGGCGTACC	Standard	YER050C::chr5_3:uptag	66.2	62.5	65.8	60.6	89.75	66	59.6	50.2
ACCTAATAACACTCACGGGT	Standard	YER051W::chr5_3:uptag	93.6	107.4	122	112.2	141	99	57.2	57.8
ACCTACCTAAAGTGACATCG	Standard	YER052C::chr5_3:uptag	67.6	65	60.2	61.6	80.6	69.8	49.8	48.6
ACCTACGAACACTAAGTCGG	Standard	YER098W::chr00_8:uptag	2866.8	2730.6	2678.2	3211.4	2554.4	1686.2	1279.4	1372.6
ACCTACGGAAAGTCAAGCCG	Standard	YDL227C::ctrl_32:dntag	5120.8	5091.4	4985.75	5320.5	4616.2	4241	4036.6	3759.8
ACCTAGCAACAGAGACCGTG	Standard	YER101C::chr00_5:uptag	290.2	329	238.4	237	754.6	297	213.4	108.2
ACCTAGTGAAACAGGACTCC	Standard	YER155C::chr00_5:uptag	184.8	158	223.6	196.6	234	279.8	125.8	75.2
ACCTATACAAACCTAGCGGG	Standard	YER156C::chr00_5:uptag	1004.8	1120.75	899.6	976	1068.4	468.6	451.6	480.2
ACCTCAAAGGATCACACGGG	Standard	YDL241W::chr4_3:uptag	1526.8	1087.8	1700.6	1550	1788	1817.8	716.2	694
ACCTCAAGAAACCTCAGTGG	Standard	YDL242W::chr4_3:uptag	3147.8	3256	3782.8	4055.2	4068.4	3485.2	1535.8	1435
ACCTCACAACAGATAGCGGG	Standard	YER157W::chr00_5:uptag	258.8	284.75	221.2	201.25	627.4	245.4	171.6	91
ACCTCATAACACTATCAGGG	Standard	YER158C::chr00_5:uptag	760.4	662.4	627.4	552.5	1030.4	812	322.8	312.6
ACCTCCTCAAAGGCTAAGAG	Standard	YDL243C::chr4_3:uptag	274.25	226.6	421.8	434.4	1076.6	587.4	227.4	245.6
ACCTCGAAATAACGACCGGG	Standard	YML112W::chr00_9:uptag	68	64	64.8	66.8	89.6	67.4	48.8	46.8
ACCTCGACAAATACACGTTG	Standard	YML111W::chr00_9:uptag	3477.4	3066.4	2736.75	2761.6	4649	4253.4	1925.8	1869.2
ACCTCGATAAAGCAGATGCC	Standard	YBR254C::chr2_4:dntag	84.2	77.6	75.2	72	136	78	66	57.2
ACCTCGCAACACGGTGAGAA	Standard	YML110C::chr00_9:uptag	93.6	93.5	92.75	82.5	142.2	87.5	63.4	50.4
ACCTCTAGCAACGAACATGG	Standard	YML109W::chr00_9:uptag	4529.2	4272.8	4201.4	4382.5	6871	5440.2	2404.4	2317
ACCTCTCTAAAGTACAAGC	Standard	YML053C::chr13_1b:uptag	3336.6	3103	3489	3011	3959.75	3629.5	1759.6	1697.8
ACCTGACAACACTATACGGT	Standard	YML052W::chr13_1b:uptag	2560.6	2580	2549	2161.8	2507	1876	1029.2	948
ACCTGAGTAAATACCACCGG	Standard	YML051W::chr13_1b:uptag	2417.6	2509.8	2343.8	2589.5	3691.2	3383.2	1218.8	1165.8
ACCTGCTAAAGGATAGCAC	Standard	YML050W::chr13_1b:uptag	1437.2	1457.8	1634.5	1601.8	1482.4	2069	746.4	716.2
ACCTGGAGAAAGCGTACACC	Standard	YMR005W::chr13_2:uptag	56.4	54.25	56.25	58.4	69.4	65	49.8	47.2
ACCTGGGAACACCATGACAG	Standard	YDR001C::chr4_3:uptag	2282.2	2030.8	2152.8	2195.2	3538	2198.2	935.6	966.4
ACCTGGTTAAAGTACGACAC	Standard	YMR006C::chr13_2:uptag	3527	3267.5	2624	3189.2	3823.5	3273.6	1632	1548.4
ACCTGTAGAGAAATTACCCG	Standard	YGR081C::chr7_4:dntag	543.8	645.8	1049.5	1099.8	1359.6	556	552	785.6
ACCTGTATAAAGTGATCCGC	Standard	YMR007W::chr13_2:uptag	3372.6	3160.8	3259.75	3250.2	4888.8	3855.2	1826	1979.2
ACCTGTCACGACTAGCTGA	Standard	YPL253C::chr16_1:dntag	719.4	491.4	599.8	509.6	1414	1047	513.2	593.2
ACCTTAACACAGTCACAGGG	Standard	YMR008C::chr13_2:uptag	321	351.4	304	295.75	762	342	250.4	171
ACCTTAATAAACGCCATCGG	Standard	YDR002W::chr4_3:uptag	85.8	100.2	105.8	90.8	159.6	94.4	65.8	58
ACCTTACGAAATACAGCGCG	Standard	YER116C::chr00_5:dntag	140	170.6	147.6	143.6	282	205.25	123.6	113.4
ACCTTAGTAAAGTGTAGCCC	Standard	YER117W::chr00_5:dntag	72.4	81.8	68.6	79.6	92.6	72	55.6	52.2
ACCTTCACAAATACGACGGG	Standard	YER118C::chr00_5:dntag	3168.6	3107.8	3294.2	3691	4535	3984.6	2918.4	2960.4
ACCTTCCCAAAGTAACAGGG	Standard	YGL117W::chr7_2:uptag	73.6	92	80.6	72.2	140	87	60.8	55.6
ACCTTTAACGACCAAGACGG	Standard	YER119C::chr00_5:dntag	1560.8	1635.2	2162.4	1851.75	2496.75	1644	1444	1420.2
ACCTTTAGAAACAGAGTCGC	Standard	YMR125W::chr00_9:uptag	83.8	95	81.4	82	216.2	82.2	70	60.2
ACCTTTCTAAATATGCGCCG	Standard	YDR003W::chr4_3:uptag	418.8	422	691.8	838	793	1366.6	410.6	400.6
ACGAAACAATACTTCCGCTG	Standard	YMR126C::chr00_9:uptag	1154.4	1357.4	1518	1498.8	2474.8	2149	459.2	501.6
ACGAAAGAAGAGGCCGTCCT	Standard	YLR086W::chr12_2:uptag	68.6	70.2	79.6	74	94	78.2	60.4	56.6
ACGAAATCAAATTCCGGTCC	Standard	YDR473C::chr4_8:dntag	72	71.8	81.2	77.6	109.8	80.4	57.6	53.8
ACGAACGAACACGTCACGGT	Standard	YMR127C::chr00_9:uptag	96.6	100.6	106.4	95.6	142.5	142.75	66.8	61.8
ACGAACGTAAATAGTCTGCC	Standard	YMR128W::chr00_9:uptag	53.8	53.4	52.75	58.25	73.6	64	44.8	43.2
ACGAAGCGAAATAGGTTCCC	Standard	YBR255W::chr2_4:dntag	588.8	416.6	1100.75	1051	1826.2	1594	766.8	688.2
ACGAAGTAACACGTCCTACG	Standard	YMR183C::chr13_4:uptag	1209.25	1582.4	835.8	996	2389.8	1967	931.4	874.6
ACGAATAAACCTCACCGGGT	Standard	YLR087C::chr12_2:uptag	1435.6	1515.6	1893.6	1605.6	1560.8	985.2	491.4	698.6
ACGAATAGAAATGTGGCCGC	Standard	YBR256C::chr2_4:dntag	57	54.6	58.4	56.4	73.4	59	46.6	43.8
ACGAATCAACACTCAGCGGT	Standard	YMR184W::chr13_4:uptag	129	144.6	119	108.8	457.75	128.4	101.6	63.2
ACGACAAACAGAGGGCCGTT	Standard	YLR088W::chr12_2:uptag	194.6	228.8	168.2	156.75	469.4	194.2	145.8	86
ACGACACAACCACAGTTTGG	Standard	YMR185W::chr13_4:uptag	309.8	360.6	266	257.5	748.25	324.8	217.2	108
ACGACACTAAATATGGTCCC	Standard	YMR186W::chr13_4:uptag	2989.6	3107.8	3335.5	3447.75	5261.6	3635	1723.8	1697
ACGACAGGAAATAGTGTTCG	Standard	YDL227C::ctrl_46:dntag	4078.2	3859.8	3336.4	4180.8	3755.25	3950.4	2811	2361.8
ACGACATCAAACGTCTAGCG	Standard	YMR155W::chr13_4:dntag	2261.5	2307.4	2329.5	2189.25	5588.4	3573.2	2553.6	2665.6
ACGACCACAACATACGGGTG	Standard	YMR156C::chr13_4:dntag	355	312	312	262.5	510.4	693.75	303.6	264.6
ACGACCCTAAAGTCTAATCG	Standard	YMR157C::chr13_4:dntag	2223.6	1934.4	2562.8	2820.2	3941.2	2632.2	2691	3099
ACGACCTTAAATCAACTGCG	Standard	YMR214W::chr13_4:dntag	2657.4	2340.8	2217.2	1993	3104.75	3204	2070.2	2067.6
ACGACGATAAACGTGATTCC	Standard	YMR215W::chr13_4:dntag	435	376	332.8	393	708.4	716.4	483.4	536.4
ACGACGTAACACGATCACTG	Standard	YMR216C::chr13_4:dntag	1153	1171.4	1109.4	1065.4	1646	1015	1085	1224
ACGACTGAACACTACGACGG	Standard	YMR217W::chr13_4:dntag	64	81	83.6	85.2	108	80.2	63.8	60.6
ACGACTGCAAAGGCTAGTAC	Standard	YLR186W::chr00_11:uptag	69.4	69.2	71.75	69.8	101.6	78.4	58.4	53.4
ACGACTTCAAAGGGCAAGCC	Standard	YDR474C::chr4_8:dntag	1827	1792.8	2389.2	2429.6	3199.2	2579.2	1944.4	2239
ACGAGAACAAGCGTACCGTC	Standard	YAL023C::chr1_1:uptag	1236.4	791.2	996.8	1003.2	1732.8	1054.2	646.6	683.2
ACGAGAGTAAATATGCTGCC	Standard	YAL022C::chr1_1:uptag	3857.4	3489.4	3472.6	3616	5043.25	4009.4	1894.2	1902.6
ACGAGCGAACACTAGCTGAC	Standard	YAL021C::chr1_1:uptag	82.4	87.2	81.2	69	160.4	89.6	61.2	51.2
ACGAGCGCAAAGGGATCACT	Standard	YLR089C::chr12_2:uptag	2432.6	2093.2	1750.4	2447.6	4568	3870.2	1432.6	1342.8
ACGAGGAAATAGACCTGCC	Standard	YBR257W::chr2_4:dntag	69	63.2	74.4	69.4	87.6	68.2	54.4	50.8
ACGAGGCGAAAGGCTACACT	Standard	YOL143C::chr00_10:uptag	72.6	82	61.2	74	89.2	77.4	55.2	50.4
ACGAGGTTAAAGTCAAGTCC	Standard	YER027C::chr5_3:dntag	63	63.4	61.6	65.2	76.6	70.2	47.2	47
ACGAGTACAAACGGATTGCC	Standard	YER028C::chr5_3:dntag	1417	796.6	1466.4	1932.6	3288.2	2543.4	1994.6	1965.8
ACGAGTAGAAATGACGCTCC	Standard	YOL144W::chr00_10:uptag	51.3333	47.6	59.5	50.8	65.2	59.2	48.6	44.2
ACGAGTGTAAAGTAGACGCC	Standard	YER081W::chr5_3:dntag	3130.6	2870.8	2626.25	3224.6	3782	3109.8	3291.8	3216
ACGAGTTTAACCGCGAAGAC	Standard	YER082C::chr5_3:dntag	68	65.8	73	78.4	95.25	72	54.4	52.2
ACGATAATAACAGCTCCTCG	Standard	YER083C::chr5_3:dntag	140.2	154.8	157.4	189.8	381	151.6	147	108.2
ACGATACTAAATGATCCCGC	Standard	YER084W::chr5_3:dntag	1510.8	1218.8	1529.75	1259.5	1980.4	1387	1121.4	1325
ACGATATGAAAGTTCCACCC	Standard	YBR258C::chr2_4:dntag	2778	2113.4	2754.8	2852.4	4142	2563.8	2198.8	2120.4
ACGATCCAACAGACACGGGT	Standard	YHL007C::chr8_1:uptag	283	310.4	244	203.4	738.4	290.8	204.8	122
ACGATCCTAAAGTACCCAGG	Standard	YHL006C::chr8_1:uptag	1931	1911.6	2111.8	2031.2	3208.2	2577.8	1055.8	1028.8
ACGATTCCAAAGGATGAGCC	Standard	YDR475C::chr4_8:dntag	473.8	470	625	538.6	1177.6	525.6	592.4	556.2
ACGATTCGACACGCAACGAG	Standard	YHL005C::chr8_1:uptag	306	283.4	319.75	381.5	688	442.2	163.8	148.6
ACGATTGCACACGCACAGAG	Standard	YOL163W::chr00_10:uptag	273.4	331.6	262.25	225.8	678	284	204.2	103.2
ACGATTTAAGACGACACCCG	Standard	YHL038C::chr8_1:dntag	57.2	55.4	58	56	69	54.4	46.8	44.4
ACGCAAAGTTAATACCCTGC	Standard	YGR082W::chr00_14:dntag	65.4	59.8	65	60.4	84	63.4	51.4	50.2
ACGCAACCAACAGCGAGTGT	Standard	YHL037C::chr8_1:dntag	369	363.5	346	279.8	996.4	452	276.4	194.4
ACGCAACGAACCACAGGTGT	Standard	YHL036W::chr8_1:dntag	153	158.8	144.8	139.4	307.6	239	122.6	120.2
ACGCACCGAAAGTGAGCGAT	Standard	YHR024C::chr8_1:dntag	183.4	138.5	185	138.75	283	137.25	193.6	179.8
ACGCAGTCAAAGTCATATCC	Standard	YPL248C::chr16_1:uptag	3285.4	3239.4	2938.6	3693.2	4525	4192.6	1649.4	1599.8
ACGCATACAAATCAGGCCGG	Standard	YDR004W::chr4_3:uptag	588.4	494	703.6	605.6	1026.6	344.8	201.6	198.8
ACGCATTTAACCTAACAGCG	Standard	YPL247C::chr16_1:uptag	876	834	1012.2	1071.75	978.6	836.8	436	360.2
ACGCCGTAACACGTACATAG	Standard	YPL246C::chr16_1:uptag	3471	3178.4	4063	4003.6	3605	3417.8	1875	2086.8
ACGCCTAGACAACAGTACGG	Standard	YPL245W::chr16_1:uptag	1549.4	1021.4	1232.8	1317	2029.6	1804.8	807.2	729.8
ACGCCTATAAAGTGCAACCG	Standard	YPL189W::chr16_1:uptag	72.2	78.8	78.75	78.4	118.2	83.8	58.2	58.4
ACGCCTCCAAAGGTCTAGGA	Standard	YNL095C::chr00_16b:uptag	3835.6	3328.4	3507	3427	6091.5	5095.2	2149	2235.4
ACGCGAAAGTACAGACCCTT	Standard	YPL188W::chr16_1:uptag	79.8	77.2	79	67.6	123.2	73.4	57.8	57.8
ACGCGCACAACAGGAGACTT	Standard	YPL226W::chr16_1:dntag	126	137.6	127.5	142.5	198	149.75	85	81.8
ACGCGCCGAAAGGGTTACAA	Standard	YNL093W::chr00_16b:uptag	1875	1738	1895.8	1456	3631	2854.8	1049.2	929.4
ACGCGCGAAAGCGTCATAA	Standard	YMR265C::chr13_5:dntag	2219	1845	1301.75	1898.4	4535.6	2866.4	2697.4	2640
ACGCGCTAACAAGAAGCCGT	Standard	YPL225W::chr16_1:dntag	2441.6	2367.2	2440.2	2399.8	5004.6	3728.6	2326.6	2149.6
ACGCGGATACAAATATGTCG	Standard	YPL223C::chr16_1:dntag	1722.4	1715	1678.4	1649.8	2925.6	3057	2348.8	2260.8
ACGCGGCAACACGTCATAAG	Standard	YNL319W::chr14_1:uptag	2791	2037	2051.25	1919.5	2765.4	2771.25	1135.8	997
ACGCGGCTAAAGGTAGATAC	Standard	YNL318C::chr14_1:uptag	3535.8	3074	2783.8	2871.2	4993.4	4157.75	1982	1938.4
ACGCGGGAACACACTACAGT	Standard	YGR083C::chr7_4:dntag	80.4	85.8	88.3333	78.4	95.25	77.6	58.8	54
ACGCGGTGAAAGGTATTTAC	Standard	YNL317W::chr14_1:uptag	88.2	89.6	106.2	101.2	147.25	93	81	73.2
ACGCTAACACGTCTACAAGG	Standard	YNL316C::chr00_8:uptag	799.6	787.4	780.8	638	890	762	399.2	397
ACGCTAAGAAACGGCAGTCC	Standard	YNL259C::chr14_1:uptag	90	84.6	91	102.2	279	138.4	68.4	59.8
ACGCTACTAAATACCATGCG	Standard	YNL258C::chr14_1:uptag	59	57.8	64	59.6	78	60.4	50	44.6
ACGCTCAAATAATACTCGCG	Standard	YNL257C::chr14_1:uptag	244.2	141.6	355.4	289.4	285.2	328	245.2	131.8
ACGCTCATAAACAGACTTCG	Standard	YNL256W::chr00_8:uptag	73	69.2	67.8	72.8	101.5	70.2	59.6	58
ACGCTCGCAAAGGTCGTACA	Standard	YNL303W::chr14_1:dntag	2919.8	2447.2	2303.25	2465.6	4683	4201.4	3056.8	3053.4
ACGCTCTTAAATATACCGCG	Standard	YNL302C::chr14_1:dntag	101.6	89	191.6	198	90.6	99.4	74.6	130.8
ACGCTGAGACAAATCCACGG	Standard	YGR084C::chr7_4:dntag	1416.8	1343.4	1155.6	1196.8	1115.6	1704.4	1362.8	1040.4
ACGCTGCGAAAGGTGAATC	Standard	YNL301C::chr14_1:dntag	233.4	178.4	250	279.8	767.2	448.8	242.6	348.4
ACGCTGGTAATGTCCATACA	Standard	YNL300W::chr00_8:dntag	2066.2	1416.8	1555.67	1777.25	3327.6	2357.5	1979.2	2328
ACGCTTCCAAACTGTCTGAA	Standard	YNL092W::chr14_3:uptag	92.4	104.4	100	103.8	248.25	159.2	87.2	83
ACGCTTGGAAACTGTTAGAC	Standard	YNL255C::chr14_1:dntag	2900	3082.4	2231	2643	5125.8	4240.25	2753.8	3144.4
ACGGACAAATACGCACCTGT	Standard	YNL254C::chr14_1:dntag	1627.2	1918.2	2055.6	1922	3120.2	2278	1985.8	1817.8
ACGGACCCAAATATACGCGG	Standard	YNL253W::chr14_1:dntag	1337.8	1216.5	1296.6	1544	1845	1217.6	1059	1263.8
ACGGACGTAAAGTCATGTAC	Standard	YNL252C::chr00_8:dntag	66.4	60.2	58	60.8	86	66.2	53	52.4
ACGGACTGAAAGTGATCTAC	Standard	YMR267W::chr13_5:uptag	69.6	60.4	62.5	61.2	89.25	71.8	52.4	51.2
ACGGAGAAATAGACTTCCCT	Standard	YLR090W::chr12_2:uptag	2517.4	2519.75	2512.8	2896.8	4214.2	2893.4	1352.2	1361.4
ACGGAGAGAAATCAGCCCTC	Standard	YBR259W::chr2_4:dntag	960.8	890.2	1044.75	904	1438.6	742.4	602.4	523
ACGGAGCTAAAGTCCTACAC	Standard	YMR268C::chr13_5:uptag	66.2	67.5	63.6	63.6	86.8	76.6	58.2	55.2
ACGGAGTAACACTGAGTACC	Standard	YMR269W::chr13_5:uptag	475.6	323.6	521.25	402.2	408.2	117.8	162.2	169
ACGGATACAACAGGATCGCC	Standard	YMR270C::chr13_5:uptag	76.8	91	79.6	82.6	112.8	87.6	59	56.2
ACGGATCAAAGTAGACCCG	Standard	YIL110W::chr9_2:uptag	492.6	284.4	544.2	427.2	1207.6	754	225.4	258.8
ACGGATCGAAAGGTATAGCC	Standard	YMR309C::chr13_5:uptag	73.8	78.8	74.4	87.2	96	103.4	55	52
ACGGCACAACCACGAAGTGT	Standard	YMR310C::chr13_5:uptag	753.8	725	581.5	595	1377	887.5	334	373.4
ACGGCAGAACAACCGGAGTT	Standard	YLR091W::chr12_2:uptag	111.4	109.25	105.2	93.4	209.25	97.6	64.2	52.2
ACGGCAGTAAACAGATGTCC	Standard	YMR311C::chr00_8:uptag	138.4	327.5	108.6	172.4	109.75	359.6	133.8	107.2
ACGGCATCAAAGTTGCATAC	Standard	YBR260C::chr2_4:dntag	1780.2	1914	2337	2598.4	4204	2675	2634.8	2633.4
ACGGCCTAACAATTAAGCCT	Standard	YGR085C::chr7_4:dntag	219	142.8	239	225.6	285	296.4	271.2	293.6
ACGGCGAGAAATACGATGCC	Standard	YMR312W::chr00_8:uptag	1142.8	797.2	1270.4	821.4	832.8	392.2	466.6	492.2
ACGGCGATAAGTCTATGAC	Standard	YMR264W::chr13_5:dntag	2850.2	2768.8	2017.8	2293.2	5737.4	4683.4	2683.2	2744.8
ACGGCTGCAAAGGCTCATAA	Standard	YLR174W::chr12_3:uptag	2959.2	2514.6	2680.6	2971.6	4697.6	3643.2	1221.4	1201.4
ACGGCTTGAAAGGGACATAC	Standard	YBR261C::chr2_4:dntag	1244.2	1212	1411.8	1299.2	2693.8	1308.4	1083.2	1131.6
ACGGGAAAGTCCATCAACCG	Standard	YDR005C::chr4_3:uptag	138	171	129	93	117.2	82	155	122.4
ACGGGAAGAAACGTCATGCC	Standard	YBR262C::chr2_4:dntag	59	56.8	56.8	56.5	85.25	70.8	46.8	49.4
ACGGGATAACAACGCAGCCT	Standard	YLR092W::chr12_2:uptag	217.8	240.2	192	178	594.5	227.4	146.4	88.2
ACGGGCTCAAAGTATGATAA	Standard	YMR266W::chr13_5:dntag	51	46	53.4	50	63.6	52	44.8	42.8
ACGGGTGAACACATATTCCC	Standard	YBR263W::chr2_4:dntag	566.8	437.5	453.4	617.25	1858.8	1036.8	805.8	766.6
ACGGTAAAGTAACTACGCCC	Standard	YMR307W::chr13_5:dntag	49.2	96.6	98.4	94.5	66.4	94.25	70.4	64.2
ACGGTAACACGCGCACAGAT	Standard	YMR308C::chr13_5:dntag	243.8	274.6	209.2	197	624	237	169.6	91.4
ACGGTAATAACAGAGCTGCC	Standard	YMR309C::chr13_5:dntag	85.4	88.8	85.2	78.2	163.25	86.4	62.2	53.6
ACGGTATAAAGTTGTACGC	Standard	YMR267W::chr13_5:dntag	62.8	63.4	67.8	69.4	85.5	70.4	52.6	52.6
ACGGTATGAAATAGCACTCC	Standard	YMR310C::chr13_5:dntag	1750.8	2031.6	1397.8	1749.8	3579.75	2695.4	1729.6	1982.8
ACGGTCAAATAATTGCACCC	Standard	YDR476C::chr4_8:dntag	173.2	125.2	196	208.2	499.4	335	321.8	322.2
ACGGTCACAAACAGGTACGC	Standard	YJL192C::chr10_1:uptag	720	730	769	652.8	1008.8	932.4	315.4	307.8
ACGGTCTAACACGCCTTAAT	Standard	YJL191W::chr10_1:uptag	108	123.5	101.5	107	336	100.6	81.2	59.4
ACGGTCTCAAAGTCGAAGAG	Standard	YJL190C::chr10_1:uptag	1913.2	1900	2194.2	2201.8	2836.4	1825.6	907.8	820.2
ACGGTGAGACAACATACCTC	Standard	YJL189W::chr10_1:uptag	78.4	84.6	75.25	82	100.2	93.4	60	56.8
ACGGTGCCAAAGTGCGATAA	Standard	YNL091W::chr00_16b:uptag	143.6	136.8	172.8	154.6	187.6	123.6	88.6	90
ACGGTGTGAAAGTCGTATCA	Standard	YJL140W::chr10_1:uptag	94.2	92.6	117.75	88.6	193.333	96.2	83.4	83.6
ACGGTTACAAATAGAGTGCC	Standard	YJL139C::chr10_1:uptag	63.2	64.4	67	64	72.75	70.2	53.4	47
ACGGTTCTAAAGGATGTACC	Standard	YJL138C::chr10_1:uptag	2306.4	1508.4	1823.8	2123.8	1343.6	3020.4	1380.8	1272.4
ACGGTTGGAAAGAACAGTCC	Standard	YBR264C::chr2_4:dntag	2352.8	1910	2215.2	2143.75	2153.4	2092	1814.4	2235
ACGTAAAGACGCATACCCGG	Standard	YJL186W::chr10_1:dntag	1461	1693.5	1451.2	1552.5	2095.25	1722.6	1208.8	1383.6
ACGTAACAATTATAGCCCGC	Standard	YJL185C::chr10_1:dntag	1655.2	1873.4	1791.4	1358.4	2555.5	2954.4	1716.8	1625.4
ACGTAACCAACACTTCAGGG	Standard	YGR086C::chr00_14:dntag	85.8	101.25	84.4	81.75	122	88.6	62.2	54.2
ACGTAACTAAATTGACGCGC	Standard	YJL184W::chr10_1:dntag	55.6	59	54.2	55.75	64.25	63.25	48.8	47
ACGTAAGGTCCGGTAATCA	Standard	YPR200C::chr16_5:dntag	2177.6	2197.6	2071.2	1838.8	4157.6	3158.2	2430.6	2366
ACGTAATTCAACGAACCGTC	Standard	YJL183W::chr10_1:dntag	119.2	85.75	67.2	77.75	192.5	155.2	138.8	156.8
ACGTACAAATACATCTCCGG	Standard	YJL134W::chr10_1:dntag	1467.75	1133.8	1334.25	1471	2734.4	1696	1347.6	1179.2
ACGTACACAAATGACTCGCG	Standard	YJL133W::chr10_1:dntag	1923.4	1627.4	1623.2	1618.6	2448.4	2193.6	1462.8	1471.2
ACGTACTAACAATGTGACCC	Standard	YJL132W::chr10_1:dntag	68.5	63	65.6	69.6	86	74.8	54	48.2
ACGTACTCAAACATTACCGG	Standard	YJL131C::chr10_1:dntag	2910.8	2853.2	3148.5	2972.6	3279	3300.8	3121	3123.8
ACGTAGCGAAACATAGTGCC	Standard	YJL081C::chr10_2:uptag	68.5	62.2	68	82.6	90.6	82	59	60.6
ACGTAGCTCAACTAACAGCG	Standard	YJL080C::chr10_2:uptag	143.4	147.8	126	130.2	477.5	166	113.8	75
ACGTAGTAACAGCACAGCCT	Standard	YJL079C::chr10_2:uptag	323	356.6	260	240	720.4	336.667	206	110
ACGTCAACAGACAAGCCGTT	Standard	YGR087C::chr7_4:dntag	476	520.2	410.6	382.8	1142.25	592.6	353.8	278.4
ACGTCAGGAAACATCACGCG	Standard	YJL078C::chr00_15:uptag	64.4	65.4	70.5	72.2	97.4	80	51.6	47.4
ACGTCATAACAATCCTACGG	Standard	YJL128C::chr00_15:dntag	902.25	1066.2	1050.25	1020.2	1598.8	1167.6	699	660.8
ACGTCCAGAAACAGTATCCG	Standard	YJL127C::chr10_2:dntag	94.6	91	95.6	89.2	171.8	88.2	68.8	54.2
ACGTCCCGAAAGTCCTTAGA	Standard	YJL126W::chr10_2:dntag	3402.4	3578.2	2968	3319.4	3510.4	3745.4	2833	2980.6
ACGTCCTCAAGTGCAGACA	Standard	YJL125C::chr00_15:dntag	89.6	95.2	85.4	87.4	169	96.8	74.6	62.2
ACGTCGCGCAACTAACGAGA	Standard	YJL074C::chr10_2:dntag	106.2	84.8	89.4	86.2	114.8	91.4	74.6	64.6
ACGTCTCTAAATAGTACCCG	Standard	YJL073W::chr10_2:dntag	2218	2146.8	2563	2611.8	4343.25	3577.2	2393	2059.4
ACGTCTGAACACTCATTACG	Standard	YJL072C::chr10_2:dntag	68	61.6	68.5	70.8	100.75	79.8	56.4	55.8
ACGTGAACAATTCCACACTG	Standard	YIL008W::chr9_1:uptag	120.2	115.75	96	99.2	399.8	112.2	93.4	62.2
ACGTGAGAACAATTCATCCC	Standard	YBR265W::chr2_4:dntag	52.2	53	54	57	72.4	59.8	47.4	46.2
ACGTGCCTAAAGTGTACTAC	Standard	YIL009W::chr9_1:uptag	3150	3512.5	3493.8	3570.4	4694	4263.4	2014.2	2034
ACGTGCGAACACTCCGAGAA	Standard	YIL010W::chr9_1:uptag	2504.2	2574	2973	2551.6	4879.8	3467	1482.8	1477.8
ACGTGCTGAAAGTGCGTACA	Standard	YIL011W::chr9_1:uptag	1959.6	1647.8	775	1095.8	3044.4	2410.4	789.6	840
ACGTGGAAAGGCGCACAACT	Standard	YLR093C::chr12_2:uptag	2375.4	1853.4	2059.4	2014.25	2930	2160.4	1224.4	867.6
ACGTGGAGAAACATCCCAGC	Standard	YGR088W::chr7_4:dntag	1685.2	1565	1674.4	1404.5	2475	2080.2	1257.2	1299
ACGTGGCCCAACCAAGTAGA	Standard	YNL090W::chr00_16b:uptag	273.8	295.25	277.8	280	607.6	319.8	189.2	147.4
ACGTGTGAACAGACGAGACC	Standard	YIL059C::chr9_1:uptag	299.4	288	286.667	251.8	872	477.8	165.4	110.8
ACGTGTGTAAACAAACCGCC	Standard	YIL060W::chr9_1:uptag	4584.8	4220	4060.8	3997.4	4959	4509.4	2369.8	2363
ACGTGTTAAGACCCAAGACC	Standard	YIL061C::chr9_1:uptag	92.4	107.6	84.8	94	195.4	98.4	68.6	56.2
ACGTTAAGACCGAAGACCCG	Standard	YGR089W::chr00_14:dntag	1893	2487.8	2470.6	2441.25	4510.75	3922.2	2089.2	2723
ACGTTAATAAGAACTCGCCC	Standard	YIL013C::chr9_1:dntag	1673.8	915	2084.2	2091.8	2205.5	1789	1617.4	1406.4
ACGTTACTAAACCACACTGG	Standard	YIL014W::chr9_1:dntag	1546.6	1563.8	1821.4	1765.4	2461.2	1469.6	1055.8	1035.2
ACGTTATACCACCAACTAGG	Standard	YIL015C-A::chr9_1:dntag	5045.8	4383.4	5448.5	5209.4	6300.8	4291.4	2799.4	2836.6
ACGTTCGTAAATAAGAGGCC	Standard	YIL015W::chr9_1:dntag	65.4	67.2	64.2	61.2	88	69.4	55.8	53.2
ACGTTGAGACAAGAAGCGTT	Standard	YIL064W::chr9_1:dntag	2541.8	2471	2728.6	2517.2	4457.75	2725.4	2191.8	2290.4
ACGTTGCACAGAAATACGCG	Standard	YGR090W::chr7_4:dntag	240.8	279	202	194.6	606.8	237.4	172	96.6
ACGTTGTGAAAGGTGTCATC	Standard	YIL065C::chr9_1:dntag	110	107.6	102	111.4	183	108.6	107.2	82.2
ACGTTTAACCCTCAAGAAGC	Standard	YBR266C::chr2_4:dntag	187	102.6	461.6	459.8	262.5	349.6	459.6	394.2
ACGTTTAATGTGAGCTACGA	Standard	YJL045W::chr10_2:dntag	811.6	705	1027.25	1058.4	2106.2	1427.6	804.8	721.2
ACGTTTCGACACTAACAGAG	Standard	YIL066C::chr9_1:dntag	1081.8	1034.6	1394.6	1246	1972.75	1251.4	1014.4	1001
ACGTTTGGAAATCAAGAGCC	Standard	YDR477W::chr4_8:dntag	95.2	98.4	363	439	116.6	106.2	154	103
ACTAAAGGAACCACCGCTTG	Standard	YDR006C::chr4_3:uptag	1207.4	1176.2	1968.6	1734.2	1129.2	775.8	545.2	436.4
ACTAAATGAACACTCCCTGG	Standard	YDR007W::chr00_16b:uptag	1079.8	1015.8	1680.6	1290.4	586.4	727.8	573.6	388.4
ACTAACACTGATGAACCCGG	Standard	YGR091W::chr7_4:dntag	60.8	58.2	58.6	64.8	81.25	60	53.8	47.6
ACTAACCTAAATCACTGCGG	Standard	YEL017W::chr5_2:dntag	654.4	397.4	840.4	592.6	196	246.8	226	320
ACTAACGAACACTTATCGCG	Standard	YEL018W::chr5_2:dntag	72.6	63.4	76	69	76.75	73.8	52.8	49.2
ACTAAGCGAAATCACGTTCC	Standard	YEL019C::chr5_2:dntag	75	64.8	66.2	71.8	95.2	77	54.6	53.6
ACTAAGTTAAATTCGGGCCG	Standard	YDR008C::chr4_3:uptag	58.4	55.2	57.2	58.2	80.75	61.2	48.6	47
ACTAATAACAGGACGGCCTC	Standard	YEL020C::chr5_2:dntag	77.4	81	88.6	94	97	84.75	78.8	53.8
ACTAATATAACAGCGTCGCC	Standard	YEL067C::chr5_2:dntag	508.25	452	709.6	624.2	879.2	943	319	409.2
ACTACAATAACATCGCGTCG	Standard	YEL068C::chr5_2:dntag	1014.4	810.4	1232.2	832	1739.4	901.8	865.2	924.6
ACTACACAACAGCTACGGGT	Standard	YDL227C::ctrl_28:uptag	563.8	511.4	472	524.8	411	408	389.4	293.2
ACTACGCTAAATCACGACGG	Standard	YLL025W::chr12_1:uptag	1933.4	1451.4	1832.25	1666.4	2772.2	2108.2	648	612.6
ACTACGGGAAATCACACTCG	Standard	YLL026W::chr12_1:uptag	1630.4	1437.2	1287.25	1380.4	1910.2	1997.2	727.6	766
ACTACTCGAAAGTCGGATAC	Standard	YLL027W::chr12_1:uptag	79.6	77.2	75	74.4	111.2	80	69.4	55.8
ACTACTTAACAGAATCGCGC	Standard	YLL028W::chr12_1:uptag	3116.8	2263	3309.75	3053.4	2632.8	3099.4	1062	1069.2
ACTACTTGAAATCATCCGCG	Standard	YLR010C::chr12_1:uptag	73.6	60.2	71.6	72.4	92.4	77.4	59.6	53
ACTAGACTAAATTCGACCCG	Standard	YLR011W::chr12_1:uptag	3186.6	3352.4	2764	2311.4	3841	1333.8	1675.2	1855
ACTAGAGGAAATGCACGGCC	Standard	YBR267W::chr2_4:dntag	192.6	210.4	175	162	545.8	169	149.8	98.2
ACTAGATAACAGATGCGCCG	Standard	YLR012C::chr12_1:uptag	421.8	315	365.4	255.4	433.5	441	200.6	170.4
ACTAGCCGAAAGTGCAGGAC	Standard	YLR013W::chr12_1:uptag	1622.8	1391.8	1491	1443.4	2049.4	1839.4	900.6	724.8
ACTAGCGCAAAGTATGGACC	Standard	YLL033W::chr12_1:dntag	55.6	57.4	61.6	58.6	79	63.6	49.6	50.2
ACTAGGAAATATAGGGCCGC	Standard	YBR268W::chr2_4:dntag	57	55.8	60	56	72.4	57.6	46.8	43.8
ACTAGGGTAAAGTGCGTCAA	Standard	YLL034C::chr12_1:dntag	79.2	75.2	69	70.2	92.8	82	53	49.6
ACTATAAACACTCACCGTGG	Standard	YGR092W::chr00_14:dntag	854.2	530.8	1007.75	618.8	974.2	617.8	777.8	907
ACTATACAACAGTCACGCGG	Standard	YLL035W::chr12_1:dntag	233.6	253.8	204.6	180.6	608.8	223.2	166.8	88
ACTATACTAACAGCACGTCG	Standard	YLL036C::chr12_1:dntag	260.75	270.6	190.4	173.4	621	218	166	89.2
ACTATATCACAACAGGCGTG	Standard	YLR018C::chr12_1:dntag	94.75	96.2	82.8	86.4	141	112.5	63.4	57
ACTATCAAATATGACCCGCG	Standard	YLR019W::chr12_1:dntag	65.8	63.2	65	68.6	84.8	69.2	48.4	47.4
ACTATCACAAATTCACGGCG	Standard	YLR020C::chr12_1:dntag	343.4	394.6	331	274.5	889.2	396.6	192.2	148
ACTATCGGAAATCACTACCG	Standard	YLR021W::chr12_1:dntag	83.75	79.6	74.6	81	119.2	100.8	58.8	56.8
ACTATCTAACAGACAGTCCG	Standard	YOR328W::chr15_4:uptag	533.6	451	518	410	1073.4	618.2	326.8	237.4
ACTATGATAACAGCAGCCCG	Standard	YOR329C::chr15_4:uptag	295.4	350	243	228	701.5	311.8	204	107.8
ACTATGGCAAATCACCCAGG	Standard	YGL118C::chr7_2:uptag	91.6	106.8	92.8	90.6	372.4	127.8	74	55.8
ACTATTATACACTACCGGCG	Standard	YOR330C::chr15_4:uptag	75.6	68.2	72.4	71.4	88.2	75.2	58.2	54.2
ACTATTCGACAATTACGGCG	Standard	YOR331C::chr15_4:uptag	55.2	58.4	56.6	57.6	77.2	63	49	46.8
ACTATTGAACACGGACACCG	Standard	YOR379C::chr15_4:uptag	1243.4	1298.8	1365.25	1679.6	1855.2	1404.4	692	492.2
ACTATTTGAAAGTCGGTGCC	Standard	YCL001W::chr3_1:uptag	681.4	717.2	1025.4	1039.8	1033.8	1351.4	469.2	387
ACTCAACGAAGACACCGGGT	Standard	YOR380W::chr15_4:uptag	3557.6	3622.6	4046.4	3824.2	5089.6	4760.6	1850.2	1841.4
ACTCACATAAATTGCAGCCG	Standard	YDR009W::chr4_3:uptag	363.8	349.2	397	343.2	808.25	389.4	246.4	166.8
ACTCACCAACAGGAGCAGGT	Standard	YLR094C::chr12_2:uptag	253.8	230.2	249.8	188.4	378	287.2	147.8	124.4
ACTCACCGAAATCAGTACGG	Standard	YOR381W::chr15_4:uptag	3126.75	3252.4	2973.8	2829.8	4397.8	3910	1743.6	1865
ACTCACGCAAATGAACGGCG	Standard	YOR382W::chr15_4:uptag	3950	3213	3787.75	3241.8	6007.4	5265.8	2307	2145.4
ACTCACGTAAAGTGCTCACA	Standard	YOR335C::chr15_4:dntag	71.8	78.8	65.4	69	79.5	70.8	56.4	50.4
ACTCAGAAATATACGTCCGC	Standard	YOR336W::chr15_4:dntag	58.2	55.6	57.8	59.8	77.4	64	50.6	48.2
ACTCAGCTAAAGTGGTAGAC	Standard	YOR337W::chr15_4:dntag	537.4	523.4	375.8	443.4	1364.8	878.6	750.6	635.4
ACTCAGGTAAATCATAGGCC	Standard	YCL002C::chr3_1:uptag	75.2	82.25	87.8	81.4	99.4	86.6	60.4	57
ACTCCAATAACAGGTACTCG	Standard	YOR338W::chr15_4:dntag	186.6	168	148	174.6	350	358.2	199.2	172.4
ACTCCACAACAGGGAATCGG	Standard	YDR010C::chr4_3:uptag	388.2	347.4	386	370.4	727.2	438	263	286.2
ACTCCACGAAACATGATTGC	Standard	YCL003W::chr3_1:uptag	68.4	60.4	70.4	64.5	88.2	76.2	58.4	53
ACTCCAGTAAATCACGTAGC	Standard	YOR383C::chr15_4:dntag	1365.2	1394	1016.6	1325.8	3766.2	2205.4	2055.2	2106.8
ACTCCATCAAATCACTAGGG	Standard	YDR011W::chr4_3:uptag	2187.4	2102.6	2655.6	2555	3013.6	2649.6	1274.2	1288.6
ACTCCGAAATAGAGGACCCT	Standard	YLR095C::chr12_2:uptag	2761.2	2865.2	2638	2322.8	2180	2299.6	1155.6	1222
ACTCCGACAAATCATAGTGC	Standard	YOR384W::chr15_5:uptag	1299.4	1189.4	1288	1187	1778.6	1424.8	728	780
ACTCCGTAACACTCTTAGGA	Standard	YOR385W::chr15_5:uptag	3204.6	2880.6	2984.8	2738.8	3557.2	3100	1522.4	1614.4
ACTCCTAAATATCAAGCCGG	Standard	YDR013W::chr4_3:uptag	100.6	105	99.4	88	276.2	106.4	82.2	58.2
ACTCCTAGAAACAGGCATCG	Standard	YOR386W::chr15_5:uptag	371.8	419	360.8	339.25	850.6	484.2	186.6	209.2
ACTCCTCGAAAGCGTTGACA	Standard	YOL036W::chr15_5:uptag	2447.2	2049.8	2688.67	2383.4	4431.4	2875	1513	1392
ACTCGAACACCTTACAAGTG	Standard	YGR093W::chr00_14:dntag	76.4	77.5	75.4	74.6	112	81	67	63.8
ACTCGAATAACAGCATCTCG	Standard	YOL037C::chr15_5:uptag	999	821	1035.2	1073.4	1762.67	1369	431	348.2
ACTCGACAACATAAGCCTGG	Standard	YOL038W::chr15_5:uptag	124.8	132.8	111.4	105.2	330.75	120.2	87.4	65.4
ACTCGACTAAATGCAACCGG	Standard	YOL039W::chr15_5:uptag	2786.2	2620.6	2947.2	2715	3279	3581.6	1425.2	1446.2
ACTCGATGAAAGTTGCGACA	Standard	YOL084W::chr15_5:uptag	2277.4	1465	1630.4	1766.2	3407	2670.2	1274.6	1337.2
ACTCGCATAAACGACAGTCT	Standard	YOL085C::chr15_5:uptag	514.8	451.75	498	456.6	634.4	537.4	170	179.4
ACTCGCTTAAAGTTCATCCG	Standard	YOR384W::chr15_5:dntag	2550.4	1948.8	2057	1995.6	4187.8	3072.2	2411.6	2559.4
ACTCGGAGACAACCGTAGAG	Standard	YOR385W::chr15_5:dntag	3139.8	2708.6	2803.25	2743.6	4802.8	3661.4	1955.8	2691.4
ACTCGGCGAAAGTGTCGATA	Standard	YOL036W::chr15_5:dntag	500.6	378	524.25	531.5	1053.2	637.2	483	393.8
ACTCGGGAACACGCTCAGAT	Standard	YOL037C::chr15_5:dntag	551	473	563.75	640	1300.2	887.75	436.6	332
ACTCGTCTAAAGGTGTAGCA	Standard	YOL038W::chr15_5:dntag	93.8	102.8	85.4	96.2	122.4	110.8	63.2	62.2
ACTCGTGGAAAGTTAGGTAC	Standard	YOL039W::chr15_5:dntag	1831.8	1654.2	1919.2	1797	3305	2912.4	1907	2114.8
ACTCTAACAGAATACCGGGT	Standard	YGR095C::chr7_4:dntag	79.4	79.8	71.8	73.8	94.6	75.6	52	54.2
ACTCTAATCAACATCGGCG	Standard	YGR094W::chr7_4:dntag	74.6	81.2	63.75	70.2	109.4	72.8	54.6	50.8
ACTCTAGTAAACGACGACGC	Standard	YOL084W::chr15_5:dntag	4443.4	3299	3830	4100.75	5444.6	4574.8	3064.6	3117
ACTCTATCAAACGAGATCCG	Standard	YOL085C::chr15_5:dntag	685.6	586.8	697.8	759.4	1369	1334	777.2	1090
ACTCTCAGACAAGAATCCGG	Standard	YOR001W::chr15_1:uptag	275.8	487.6	671.4	766	681.2	295.6	246	185.8
ACTCTCGAACACTATTGACG	Standard	YOR002W::chr15_1:uptag	2154.6	1658.2	2213.6	2039.6	2789	3054	1278.6	985.4
ACTCTGATAAATCCGACACG	Standard	YOR051C::chr15_1:uptag	2311	2102.4	1984	2080	3373.2	2707	1206.4	1220.4
ACTCTGTAACACGTTTAGCC	Standard	YOR052C::chr15_1:uptag	3587.2	3311	3174	3253.2	5196.8	4309	2245.4	2195
ACTCTGTGAAAGTGGGTTAC	Standard	YOR053W::chr15_1:uptag	2882	3070	2769.33	2972.75	5065.2	3596.75	1823.8	1914
ACTCTTAGAAATAGCAGGCC	Standard	YCL004W::chr3_1:uptag	78	103.4	90.8	83.6	111.4	88.8	61	56.6
ACTCTTCAACACTTCTAGGG	Standard	YOR054C::chr15_1:uptag	2041.8	1608.75	2174	2190.4	2680.75	2829.4	692.8	620.2
ACTCTTCCAAAGGTTCAGAC	Standard	YCL005W::chr3_1:uptag	82	77.8	101.8	83	165.5	100.4	62.8	61.4
ACTGAAGAACAGGTAGGCTC	Standard	YOR007C::chr15_1:dntag	96	104.6	85.6	104.4	178.5	138.2	71.4	67
ACTGAAGTAACAGCCACCGG	Standard	YGR097W::chr7_4:dntag	276.4	341.8	255.2	233	733	293.2	209.2	103.8
ACTGAAGTTGGAGAACCCT	Standard	YGR096W::chr7_4:dntag	2483	1937.6	2660.8	2704.4	3985.2	2430.6	2194.2	2046.2
ACTGACAAATCGAGCACCGG	Standard	YGR098C::chr7_4:dntag	112.6	101.8	122.4	125.2	159	120.4	96.4	104.4
ACTGACATAACATACGGTCC	Standard	YOR008C::chr15_1:dntag	369.4	408	381	278.8	567	572.8	440	427.8
ACTGACTAACAGCTAATCCG	Standard	YOR009W::chr15_1:dntag	314.6	297.4	271	230	760.75	398.2	264.8	236.8
ACTGACTCAAATCGACGACG	Standard	YOR010C::chr15_1:dntag	931.4	900.6	794.75	788.2	2818	1440	1138.4	1190.8
ACTGAGACAAGCAAGCCGCT	Standard	YGR099W::chr7_4:dntag	208.8	245	178.2	167.75	575.4	205	138	81.6
ACTGATGTAAATCCACACCG	Standard	YOR058C::chr15_1:dntag	162.8	188.8	159	154.2	592	177	129	79.6
ACTGCAAACAACGGGACGT	Standard	YOR061W::chr15_1:dntag	1308.8	1359.2	2082	1951.4	1642.2	1755	1226.4	1582.6
ACTGCAACACCTGCTAAGAG	Standard	YOR059C::chr15_1:dntag	2802	2381.75	2474	2437.67	4276	2292	1866.8	1931
ACTGCAATAACATATCCGCG	Standard	YOR060C::chr15_1:dntag	64.2	61.6	62	60.5	85.4	68.6	53.6	52.8
ACTGCACGAAATCGACATCG	Standard	YHR058C::chr00_10:uptag	67	60.6	60.3333	66.6	83	68.4	56.4	51.2
ACTGCATGAAAGTGTCTACC	Standard	YHR059W::chr00_10:uptag	2657.6	2290.4	2552.25	2849.8	3592.6	2275.6	1474.4	1688.2
ACTGCCCTAAATAGAAGTCC	Standard	YCL006C::chr3_1/chr00_12:uptag	3190	3312	3540.8	3591.8	4890	3620.2	1809.2	1797.8
ACTGCCGAACACTTCTGAAT	Standard	YLR096W::chr12_2:uptag	2220.4	1630.25	1910.8	1968	2505.2	2231.25	976	1007.8
ACTGCCGCAAAGGTTGATAA	Standard	YLR175W::chr12_3:uptag	91	91.6	86.2	89.2	122.8	89.4	63.8	61.4
ACTGCGCGAAAGTTGGTACA	Standard	YHR060W::chr8_2:uptag	55	53.8	58	56.4	77.8	66.4	48.6	51
ACTGCGTAACACTGGCGAAC	Standard	YHR061C::chr8_2:uptag	4094.6	4130.4	3572	4221.6	4399.4	4417.6	1755	1738.6
ACTGCTAAATACACTACGCG	Standard	YHR109W::chr8_2:uptag	73.8	65.4	73.6	72	95	85.2	53.8	48.4
ACTGCTAGACAACGACCAGG	Standard	YHR110W::chr8_2:uptag	283.6	253.2	259.75	278.4	637.75	322.8	162.8	121.4
ACTGCTCCAAATAGATACCG	Standard	YHR111W::chr8_2:uptag	821.6	648.2	764	908.8	998.2	804.2	312.4	404.6
ACTGCTCTAAACTCTTCAGG	Standard	YHR112C::chr8_2:uptag	760.8	532.4	847	727	954	878.8	229.2	200.4
ACTGCTTTACCTGCAAGAC	Standard	YCL007C::chr3_1:uptag	64.4	62	64.6	62.6	76.4	71.6	52.8	46.4
ACTGGACTAAACTCAACTCG	Standard	YHR065C::chr8_2:dntag	79	73.2	69.5	70.4	101.5	106.8	58	56.6
ACTGGAGAACAGAGACTCGC	Standard	YHR066W::chr8_2:dntag	916.25	922.2	912.25	716.2	937.5	535.4	479.8	424.6
ACTGGCCCACAGAACGAGAT	Standard	YLR097C::chr12_2:uptag	298.8	330.5	281.2	268.5	683.8	304.8	257.6	173
ACTGGCCTAAAGCCGCGATA	Standard	YNL089C::chr14_3:uptag	1417	1324.8	1421.2	1011.5	2168.6	1571.2	731.4	545.6
ACTGGCTCAAATATCGAGAC	Standard	YGR201C::chr00_10:dntag	1736.2	1528	1785	2075.6	3297.8	2570.2	1602	2105.4
ACTGGGCCAAAGGCGTATAA	Standard	YLR176C::chr12_3:uptag	3156.4	2659.8	3017	2784.75	3067.8	2525.25	1275.8	1437.8
ACTGGTGAACACGGTTTACA	Standard	YHR116W::chr8_2:dntag	243.2	286	413.75	415.2	316.6	723.8	240.8	326.8
ACTGGTGCAAAGTCTTCGAC	Standard	YHR117W::chr8_2:dntag	1672.4	1493.2	1378.4	1059.8	2996.6	2576.4	1311.2	1153
ACTGTAAATCCCACCAAGGG	Standard	YGR100W::chr7_4:dntag	380.6	374	353.6	316	999	483.8	376	267.2
ACTGTAACACTCGTCAAGAC	Standard	YHR118C::chr8_2:dntag	51.8	56	53	55	72.8	66.2	46.2	38.8
ACTGTAATAACCAAGCCTCG	Standard	YHL039W::chr00_10:dntag	209.8	235.25	186	179.5	666.2	235	153	97.6
ACTGTACCACACAAGCAGGG	Standard	YBR292C::chr00_1:uptag	402	429.5	483.8	422	1000.4	389	389.8	271.2
ACTGTACGAAACGAGATGCC	Standard	YBR293W::chr00_1:uptag	598.333	497.6	728	749.6	1202.2	868.4	331.2	336.6
ACTGTAGAACATAAGCGCCG	Standard	YBR294W::chr00_16a:uptag	1943.8	1865.8	2466.5	2091.2	2206.5	2154.6	1339.2	1348.6
ACTGTAGGAAATCATCGACC	Standard	YBR295W::chr00_1:uptag	838.2	849.8	724.25	635.6	935.5	922.8	319	286.2
ACTGTCGCAAATATCACACG	Standard	YCR072C::chr00_16a:uptag	70	71.6	73	72.2	105.8	74	52.8	50.2
ACTGTCTAACACTGTATCCG	Standard	YCR073C::chr00_16a:uptag	3107.6	2525.8	2926.5	3152.2	4092.6	3308.6	1520.2	1321.2
ACTGTCTGACCAACCAATAG	Standard	YCR073W-A::chr00_1:uptag	3110	2863.5	3247	3298.75	3612.25	3363.2	1459.8	1481.2
ACTGTGCGAAATCCCAGACA	Standard	YNL088W::chr14_3:uptag	148.4	159.2	136.4	113.5	502.6	142.8	108	68.4
ACTGTGGAACACTGCCCAAG	Standard	YDR014W::chr4_3:uptag	1824.2	1298	1905.6	1757.8	2858.25	1924.4	824.8	724.6
ACTGTTCTAAACGGTTGACC	Standard	YCR075C::chr00_16a:uptag	3614.4	3067.2	3441.6	3577	4357.8	4084.6	2121.2	1878.8
ACTGTTGCACACTTAACCAG	Standard	YBR301W::chr00_16a:dntag	2171	1589	2456.8	2444.8	3816	2963.8	1871.6	2164.2
ACTTAAATCTCAACACGGC	Standard	YGR101W::chr7_4:dntag	305	209.8	302.4	337.8	601.4	219.6	304.8	234
ACTTAATAACAGTGACGCCG	Standard	YCL001W-A::chr00_1:dntag	207.4	199.8	183	177	333.2	405.25	147.2	167.2
ACTTACAAATGAAGCGCCCT	Standard	YDR149C::chr4_5:dntag	731.6	973.6	1146.2	1394	1314.4	433.4	743.8	1010.2
ACTTACACAACATCAGGCGG	Standard	YCL026C-A::chr00_16a:dntag	637.4	530.5	528	492.75	1074	714.4	455.4	388
ACTTACGAACAATCTCAGCG	Standard	YCR020W-B::chr00_1:dntag	92	77	70.75	70	186.4	76.6	60.8	52.8
ACTTACGCAAATCTACACGG	Standard	YCR089W::chr00_16a:dntag	959	1098.6	983.6	852.8	1986.6	1802.6	780.8	870
ACTTACGTCAAGACAACTCG	Standard	YPL187W::chr16_2:uptag	3708.2	3095	2825.8	2926.4	4838.8	4578.8	2232	2156.2
ACTTACTAACATACACCGGG	Standard	YPL185W::chr16_2:uptag	1864.8	1702.4	1659.6	1562	2135	1685.75	719.4	850.8
ACTTAGAAATCGAGCGACCC	Standard	YPL186C::chr16_2:uptag	515.2	512.6	444.25	396.8	847.25	763.6	337.8	441.4
ACTTAGCAACAGCCATACGG	Standard	YPL128C::chr16_2:uptag	276.4	315.8	250.2	217	614.75	263	193.8	100
ACTTAGCTCAAGAACCAGTC	Standard	YPL127C::chr16_2:uptag	866.6	730.6	711	975.5	2110	1184.8	532.6	559.6
ACTTATGAACAGCACGACCG	Standard	YPL126W::chr16_2:uptag	267	315.8	227.4	220.4	692.6	253.75	190.6	100.2
ACTTATTTAACGAGCACCCG	Standard	YPL125W::chr16_2:uptag	908.2	653.6	687.5	626.4	917	624.4	350	344.8
ACTTCAAATGATAACCGGCG	Standard	YDR015C::chr4_3:uptag	3981.4	3686.8	4073.4	4111.8	4422.6	4334.2	2234.8	2071
ACTTCAAGAACATGACCTCG	Standard	YPL165C::chr16_2:dntag	1997.6	1783	1691.8	1906.75	2636	2066.6	1989.2	2034.8
ACTTCATTAACATCGACGCG	Standard	YPL164C::chr16_2:dntag	647.2	652.4	737	792.8	1396.2	882.4	695.6	688
ACTTCCAACTCGGAGGAGA	Standard	YNL121C::chr00_16b:dntag	1412.8	1295.6	1686.6	1577.5	2257.2	1743.8	1584.6	1732.8
ACTTCCACAAACCAGGAGGG	Standard	YGL120C::chr7_2:uptag	259.8	294.4	208.4	186.6	577.4	245.8	170.6	78.8
ACTTCCATACAACCAGGAGT	Standard	YGR102C::chr7_4:dntag	142	147.2	132.8	112.4	387	152	102.2	62.8
ACTTCCCTAAACTTGTTCGG	Standard	YDR016C::chr4_3:uptag	64	60.8	68.4	62.2	104.2	66.2	51.4	51.4
ACTTCCGAAACGAACAGTC	Standard	YGR104C::chr7_4:dntag	64.8	69.2	68.4	65.6	86.8	73.4	55.2	52.8
ACTTCGACAGACAACTACGT	Standard	YPL163C::chr16_2:dntag	1207.8	1106.4	1188.25	1178	2150	1429.75	965.4	794
ACTTCGCCAAATATCTTCGG	Standard	YDR017C::chr4_3:uptag	70	61.4	72.8	63	85.6	66.8	47.6	44
ACTTCGGGAAGGGACCACA	Standard	YLR177W::chr12_3:uptag	241.8	251	210.2	219.8	548.8	219.8	159.2	121.6
ACTTCGTTAAATCCGTACCG	Standard	YPL162C::chr16_2:dntag	629.8	556	660.6	521.4	1812.6	649.4	373.2	699
ACTTCTAGCAAGACAACGTC	Standard	YPL108W::chr16_2:dntag	177.25	168.75	164.25	147	394.4	202.6	168.2	204
ACTTCTCAACAGATAAGCGC	Standard	YPL107W::chr16_2:dntag	175.8	195.4	154	141.6	438.8	173.6	116	77.6
ACTTCTGTAAATCGCAGCAC	Standard	YPL106C::chr16_2:dntag	207.6	202.8	169.25	148.75	508.2	176	117.6	75
ACTTGAAATGAGAAGCCCGT	Standard	YDR150W::chr4_5:dntag	2094	1902.2	2046.6	2247.8	1598.4	1596.8	1505.2	1457.4
ACTTGAACACTCCCAATGG	Standard	YGR103W::chr7_4:dntag	61.8	64.4	53.4	53	63.4	49.8	45.4	42.8
ACTTGAGGAAACCAGATTCG	Standard	YDR018C::chr4_3:uptag	2822.8	2628.4	3283.6	3331.8	4134.25	2964.2	1340.8	1320
ACTTGCACAGCACAATACGT	Standard	YPL105C::chr16_2:dntag	262.8	317.6	237	202	589.8	268.8	190.6	94.4
ACTTGCCTAAATCCTAACGG	Standard	YDR019C::chr4_3:uptag	3221.6	3056.8	3536.8	3679	4004.4	3581.8	1769.8	1757.8
ACTTGCGAACAGACGTACAC	Standard	YNL200C::chr14_2:uptag	1864	1569.2	1239.25	1560.6	3705	2467.8	915.2	873
ACTTGGATACAACCACATCG	Standard	YNL199C::chr14_2:uptag	225.8	244.4	210	211.8	584.75	189.4	145.6	103
ACTTGGGAACAAATTGAGCC	Standard	YGR105W::chr7_4:dntag	52.6	42.6	57.6	55.2	68.4	54	49	42
ACTTGGTGAAACAACGCTAC	Standard	YGR106C::chr00_14:dntag	790.2	706.6	888.75	916	2307.6	1202.8	828.8	1030.2
ACTTGTAGAGAACGAACGCT	Standard	YNL198C::chr14_2:uptag	360.75	283.8	784	1053.5	425.2	265.5	357.6	230.8
ACTTGTCAACATAACGACGG	Standard	YNL197C::chr14_2:uptag	71.75	78.2	73	71	100.2	81.2	57.2	58
ACTTGTGCAAACTTCTGACC	Standard	YCL008C::chr3_1:uptag	63.8	58.4	61	65.4	82.6	66.2	51.8	48.4
ACTTTAACGCAGAAGACCCT	Standard	YGR107W::chr7_4:dntag	936.2	750.4	1009	680.4	822.8	866.2	294.8	367.8
ACTTTAATAAGACACGGCCC	Standard	YCL009C::chr3_1:uptag	243.6	279.2	244.2	217.6	665.8	251.8	174.8	106.6
ACTTTACAACAGCCCGAGAG	Standard	YNL236W::chr14_2:dntag	253.2	305.25	216	190.8	590.25	247.8	167.6	87
ACTTTACCAAATGGAACGCC	Standard	YDR478W::chr4_8:dntag	57	59.2	58.8	60.2	77.25	66.6	47.6	48.6
ACTTTACGAAACCCAAGCGG	Standard	YDR020C::chr4_3:uptag	795.8	763.4	957	989	712	905	311	273.8
ACTTTATACCAATACGCGGC	Standard	YNL235C::chr14_2:dntag	70.2	62.2	70.6	65.25	93.6	78	56.2	53
ACTTTCTAACAGAGCAGACC	Standard	YNL234W::chr14_2:dntag	283	293.4	226.6	204.6	780.4	318.4	217.2	129.2
ACTTTGAACCAACCGACAGG	Standard	YDR021W::chr4_3:uptag	90	106.6	94.8	104.2	208.25	102.4	65.4	58.4
ACTTTGTGAAATCCCGATCC	Standard	YDR479C::chr4_8:dntag	3286.2	2861.2	3361.8	3216.2	3739.6	3569.2	1957.8	2121
AGAAACAACGGTACGCCCTG	Standard	YGR108W::chr7_4:dntag	130.4	135.8	132	118.6	200.5	140.6	74.4	84.6
AGAAACGAACCAGCCCTGTG	Standard	YGR109C::chr7_4:dntag	408	479.8	393.8	343.4	965.8	421.75	300.4	202.4
AGAAACGCAAATGCCTCTCG	Standard	YDR022C::chr4_3:uptag	2498.6	2427.8	2831	2453.2	3033.6	2843	803.6	727.2
AGAAAGTAATAGCCGCGCCG	Standard	YNL177C::chr14_2:dntag	156.2	168.2	139.4	123.6	544.5	163.4	129.6	76.6
AGAAATACGGACACCCGGCT	Standard	YLR098C::chr12_2:uptag	776.4	548.4	530	543.6	1001.75	578.6	293.6	249.6
AGAAATAGGCCAGAATCCGC	Standard	YAL016W::chr00_12:uptag	214.25	224.4	188.4	164	569.2	206.2	145.6	86.4
AGAAATCAAGACTCCGTCGT	Standard	YNL233W::chr14_2:dntag	1119.4	707	685.4	532.5	1269.5	664	802	799.8
AGAACAGGAACATCGCTGCC	Standard	YCL010C::chr3_1:uptag	334	482.8	549.2	442.2	727.75	922.2	235.2	187
AGAACATACAAGCCTCTCGG	Standard	YGR110W::chr00_14:dntag	109	120.8	94.8	99	317.4	109	84.2	59.6
AGAACCAAGCAGACCGCTGT	Standard	YGR111W::chr7_4:dntag	499.8	459.25	535.4	511.5	839.2	465.2	287.8	292.4
AGAACCACAACTACCGTTTG	Standard	YNL176C::chr14_2:dntag	1572.4	1549.8	1253.8	1146.75	2065.25	1527.8	953.8	1085
AGAACCGGAACCAAGGTCCT	Standard	YDR151C::chr4_5:dntag	1886	1543.6	2416	2629.6	3840.8	2434.6	1514.6	1835.2
AGAACGCAACATACTCTCGT	Standard	YDL227C::ctrl_39:uptag	45.4	41.5	48.75	46.2	56.6	48.4	42.2	38.6
AGAACGTAACAGCCGATCCG	Standard	YNL175C::chr14_2:dntag	414.6	416	400.4	331.8	1016.5	473.2	273	206.4
AGAACTACAACAGGCTCCTT	Standard	YGR112W::chr7_4:dntag	69.2	79.4	73.2	71.4	80.5	73	55	52
AGAACTGAACAGGAGGTCTC	Standard	YJR001W::chr00_13:uptag	213	222.6	179.8	201.4	583.5	358.6	112.2	103.4
AGAAGACAAGACCGTCGCGT	Standard	YJR002W::chr00_13:uptag	150.6	130	133.4	155	182.4	155	99	91
AGAAGATCAACAGCTCGTCC	Standard	YJR003C::chr00_17b:uptag	290.6	283.2	243.6	240	685.8	261.2	193.4	120.8
AGAAGCAACAGGACTTGGCC	Standard	YDR480W::chr4_8:dntag	1102.8	984.8	1111	1249.4	2274	1307	656.2	581.6
AGAAGCAGAACAGGGTCTCC	Standard	YCL011C::chr3_1:uptag	159.4	156.8	181.25	160.4	228.2	156.4	73.4	59.8
AGAAGCCCAACACGGTCTAG	Standard	YJR004C::chr00_13:uptag	112.2	138	122.4	117.5	229.2	121.8	80.4	71.2
AGAAGCTCAACCCAACGTGG	Standard	YDR023W::chr4_3:uptag	58.75	58.8	59.4	50	69	53.2	45.6	41.8
AGAAGGCCAACCAATCTCGG	Standard	YGL121C::chr7_2:uptag	1950.2	1451.2	1864.6	1673.8	2363	1504	749.8	618.8
AGAAGGGTAACCAACGGCCT	Standard	YDR152W::chr4_5:dntag	756	623.6	930	864.2	1399	863	454.4	440.2
AGAAGTACATAGTTGCCGC	Standard	YGR113W::chr7_4:dntag	63.8	65.8	63.25	81	99.8	77.25	65	62.6
AGAAGTCGAACAGCCTCTAC	Standard	YJR057W::chr00_13:uptag	208.4	258.4	188.25	173	608.6	206.5	165.2	84.8
AGAATAAATTACTGCCCGGC	Standard	YDR481C::chr4_8:dntag	2225	1837.4	1934.8	1978	3019.6	2175	1618	2016.4
AGAATAACATGACGTGCGCG	Standard	YGR114C::chr7_4:dntag	279.8	264	271.75	323.25	219.2	192.75	177.6	157.2
AGAATACCAACATCCGTTCG	Standard	YJR058C::chr00_13:uptag	1882.6	1760.4	2240.8	2280	2284.4	1987.8	968.4	1008.8
AGAATATAAGACCGCTGCCG	Standard	YJR059W::chr00_13:uptag	502.8	564.8	427.4	476.6	876.6	284.8	191.6	190.4
AGAATCTAACAGCGATGCCG	Standard	YJR060W::chr00_13:uptag	168.4	232.5	172	166.4	574.8	215.8	156.6	86.8
AGAATCTCAACCACACTTGG	Standard	YDR024W::chr4_3:uptag	251.75	245.2	387.8	279.8	591.2	218	149.8	109.8
AGAATGAGAACAGGTTGTCC	Standard	YCL012W::chr3_1:uptag	321.6	353.2	349.8	378.8	543.2	396.6	169.8	179.8
AGAATTGTAAATCGGACCCG	Standard	YDR025W::chr4_3:uptag	870.2	718.4	861	1131.6	665.6	759.6	416.6	385.8
AGAATTTCAACAGGAGTGCC	Standard	YDR482C::chr4_8:dntag	252	208.6	208	208.8	470.75	388.8	215	221.2
AGACAAACATTCACGCCGGG	Standard	YGR115C::chr7_4:dntag	179.6	189.6	168.6	168	529	192.8	137.2	83.8
AGACAAAGCACCCACTTGG	Standard	YGR116W::chr00_14:dntag	88	111.6	92.2	98.8	201.6	91	67	56.4
AGACAATGAAGACGCGGTCC	Standard	YJR021C::chr00_13:dntag	1131.2	1131.6	1328.2	1181.2	1874	1513.4	1214.4	1262
AGACACACAACGTACTCGGG	Standard	YJR022W::chr00_17b:dntag	97.4	100.2	90.8	92.4	155.75	91.2	71	59.4
AGACACAGAACTACCGCGTG	Standard	YJR023C::chr00_13:dntag	265.8	291	209.4	193.4	622	244.4	187	97.6
AGACACGCAAGAAGCTGGCT	Standard	YLR099C::chr12_2:uptag	648.6	452.6	524.4	492.6	1023.75	561	301	238
AGACACTTAACGACACGCGG	Standard	YJR024C::chr00_13:dntag	201	153.2	206.6	177.75	328	322.5	198.8	225.8
AGACAGACAAGACGCTCCGT	Standard	YIL112W::chr9_2:uptag	1048.6	954	1134.75	1064.25	1287	1273.5	402	347.2
AGACAGGAACCAACTTCGCT	Standard	YGR117C::chr00_14:dntag	59.8	66.8	65	62.8	81.4	70.4	50.4	47.8
AGACAGTCAACCAATTCGCG	Standard	YIL113W::chr9_2:uptag	2626.4	2168.2	2513.4	2428.2	4235.2	3386	1239.8	1310.8
AGACATAACGAGACCCGCGT	Standard	YGR118W::chr7_4:dntag	59.6	54.8	56.75	57	65.2	54.75	43.4	40.8
AGACCAATAAGCACCCTGGG	Standard	YGL122C::chr7_2:uptag	75.4	74.8	79.5	72.2	119.2	64.6	50.6	41.8
AGACCAGGAACCACAGTCGT	Standard	YIL114C::chr9_2:uptag	369.6	374.2	341	286	790	314.2	263	195.6
AGACCCTTAACCAAGATCGG	Standard	YDR026C::chr4_3:uptag	3118.2	2492.6	2919.4	2475.6	4366.6	2149.2	1562.6	1452.2
AGACCGAAATCTAATCCCGG	Standard	YDR027C::chr4_3:uptag	50.6	51.2	56.6	55	66.8	55.6	45	42.6
AGACCGTAACATAAGTCCCT	Standard	YIL115C::chr9_2:uptag	70.2	65.2	73.75	68.75	89.4	67	56.4	52
AGACCGTGAACCAATACTCG	Standard	YIL168W::chr9_2:uptag	3113	2609.8	2846	3200.8	4181.8	3771.2	1550	1421
AGACGAGTAACCACCACGGT	Standard	YIL170W::chr9_2:uptag	655.4	570.8	779	707.8	1209.2	684	343.4	256
AGACGCCGAACCAAGCGATT	Standard	YLR100W::chr12_2:uptag	195.8	218.2	161.4	152.8	501.4	176.5	130.8	72.2
AGACGCTCAACCACGAGAGT	Standard	YIL171W::chr9_2:uptag	79.8	85.8	78.2	75.4	111.75	82.2	55.2	47
AGACGGACAACCACTGACGT	Standard	YIL128W::chr9_2:dntag	243.4	249.2	256	304.8	442	153	158.6	102
AGACGGTTAAGCACAACGCC	Standard	YIL129C::chr9_2:dntag	115.4	126.6	95.2	103.2	392.4	111	79	68.8
AGACGTGTAAATCGTAACCC	Standard	YIL130W::chr9_2:dntag	2182.5	2255.6	2479.6	2739.6	3668	3531.8	2092.2	2196.4
AGACGTTACGACCAAGCTA	Standard	YFR003C::chr6_1:uptag	99.25	115.8	88.4	99.8	222	102.6	59.2	46.8
AGACTAAGACGAGCCCTCT	Standard	YIL131C::chr9_2:dntag	402	289.6	292.5	249.25	649.6	628.75	415.2	544.6
AGACTACTAACCACTATCGG	Standard	YIR007W::chr9_2:dntag	1335.5	1613.6	1551.2	1600.6	2586	2752	1445.6	1216
AGACTATAACCAGACCTCGG	Standard	YIR008C::chr9_2:dntag	129.6	123.6	99.8	100.8	321.8	126.2	90.4	63.8
AGACTCGAACATACACGCGG	Standard	YIR009W::chr9_2:dntag	67.6	67.8	70.2	66.2	80.4	66.6	48.6	46.8
AGACTCTAAATTGTCCGAC	Standard	YOR057W::chr15_1:uptag	54.5	51	57	53	64.5	61.2	47.2	47
AGACTCTGAACCACGCATAG	Standard	YIR010W::chr9_2:dntag	233	244.6	196.8	193	651.6	226.6	162.4	88.8
AGACTGAGAACCACGTCACG	Standard	YOR143C::chr15_2:uptag	140.4	190	127	106	455.667	137.6	101.6	70.6
AGACTGGTAACCCAACTACG	Standard	YOR144C::chr15_2:uptag	2145.4	1316.8	2241.4	2292	1196.25	1755	955.8	966.8
AGACTTGCACATAACAGTGG	Standard	YGR120C::chr7_4:dntag	83	90	75.4	75.8	109.4	84.6	67.8	64.4
AGAGAAAGGAATTTGCCCTC	Standard	YGR021W::chr7_3:dntag	1946.75	1541.8	1538.2	1697.4	3174.8	1633.8	1270.4	1633.6
AGAGAACGAGACAGCCCTTC	Standard	YOR145C::chr15_2:uptag	222.6	276.4	187.2	191	619.6	238.8	159.4	95.6
AGAGAATTAACGACGCCTCC	Standard	YOR146W::chr15_2:uptag	71.4	67.8	66	72.4	93.2	74	59.8	56
AGAGACATAACTACCCTCGG	Standard	YOR183W::chr15_2:uptag	61.2	63.6	68.6	64.8	82.4	67.2	50.8	48.2
AGAGACCCAACCATACGGTG	Standard	YOR184W::chr15_2:uptag	925.4	905	963.8	787	836	1125.6	362.4	329.6
AGAGACGTAACCAGAGTTCC	Standard	YOR185C::chr15_2:uptag	380	317.2	384.4	344.8	905.6	519	219	173.2
AGAGAGACAACTAGCGGCCT	Standard	YOR186W::chr15_2:uptag	1851.8	2050.8	2104.2	1885.2	3282.2	2619.6	702	573.2
AGAGAGCCAAATGACTGTCC	Standard	YCL013W::chr3_1:uptag	1860.2	1246.2	2197.6	2058.2	2478.75	2142.6	875	716.2
AGAGAGTAACATCACCCGCT	Standard	YEL005C::chr5_2:uptag	1575.2	887.8	1000	1914.6	2616.2	274.4	329	568.8
AGAGATAACGAACGGTCCTT	Standard	YEL006W::chr5_2:uptag	940.6	1201.8	1002.8	978.4	696.4	1168.6	389	306.2
AGAGATGGAAATGATGTCCC	Standard	YDR483W::chr4_8:dntag	1534.2	1214.4	1428.4	1892.2	3459	2763.4	1565.4	1709.6
AGAGCAAGAACAGTTGGTCC	Standard	YCL014W::chr3_1:uptag	4067.6	3183	3744.4	3911.8	4747.2	3367.6	1736.2	1595.4
AGAGCATAACATCATGGCCC	Standard	YDR484W::chr4_8:dntag	71.5	66	64	74	102	79.4	56.6	59.2
AGAGCATGAAATAGTCGTCC	Standard	YEL007W::chr5_2:uptag	65.4	62.4	63.6	70.4	80	79	47.6	48.4
AGAGCCCTAAATCGGAGACC	Standard	YCL016C::chr3_1:uptag	90.4	77.2	88.2	83	140.75	91.6	63	58.6
AGAGCGCAACACCACATTGT	Standard	YLR101C::chr12_2:uptag	214	253	187.4	174.8	596.2	212.6	143.8	86.4
AGAGCGGAACAGAGCCACTT	Standard	YLR102C::chr12_2:uptag	560.6	622	705	625.6	1127	781.2	464.6	461.4
AGAGCGGGAAATCCTAAGCC	Standard	YDR485C::chr4_8:dntag	1182.4	1080.6	1925.8	1515.4	1662.8	1158	719	590
AGAGCTATAACTGTATCTCC	Standard	YIL029C::chr9_1:dntag	153.5	102.4	137.2	171.4	393.2	218.2	181.4	164.6
AGAGCTTTAACGAGGAAGTC	Standard	YEL043W::chr5_2:uptag	855	756.4	1030.4	1078	626.4	1140.8	383.8	267.6
AGAGGAGAACATCCACTCGC	Standard	YEL044W::chr5_2:uptag	73.8	77.8	69.6	82.8	123.8	102.4	54.8	57.4
AGAGGAGCAAATGCGACTTC	Standard	YCL017C::chr3_1:uptag	60.2	55.6	59.6	56.6	71.4	61.2	50	46.4
AGAGGCATAAATGAGTCTCC	Standard	YDR050C::chr00_11:uptag	54.8	49.8	54.75	55	75	58.2	43.2	40
AGAGGGCCAAATCATGTGAC	Standard	YDR486C::chr4_8:dntag	2819.6	2577	2843.6	3356.6	4900	3460.4	1901	2077.6
AGAGGGTAACAGAGTATCCT	Standard	YEL045C::chr5_2:uptag	79.2	86.4	82.6	67.8	99.6	73.8	60.6	54
AGAGGTTCAAATCGGGATAC	Standard	YDL227C::ctrl_51:dntag	5640.6	5538.4	5301.2	5849.6	6744	6180.4	3905.8	4126.2
AGAGTAACCAAGCTACCGCG	Standard	YEL046C::chr5_2:uptag	101.6	113.2	116.5	104.5	236.2	119.5	94.4	84.4
AGAGTACGAAATCTAGCTCC	Standard	YER003C::chr5_2:uptag	48.3333	44.6	46	45.4	60	55	42	39.6
AGAGTATAACATCTCACCCG	Standard	YER004W::chr5_2:uptag	176.6	135	234	155.4	202.5	169	100.6	99
AGAGTCGAACATAGCACCCG	Standard	YER005W::chr5_2:uptag	404.8	418.2	511.8	627	512.4	563	232.4	184
AGAGTCTCAAATCGTCAGAG	Standard	YER006W::chr5_2:uptag	93.2	97.6	89	91	297	96.25	80.2	54.8
AGAGTTATACAGAGACCTCG	Standard	YER053C::chr5_3:uptag	680	597.75	691.2	610.4	833.2	919.8	370.4	336.6
AGAGTTGAACAGCATACCCT	Standard	YLR103C::chr12_2:uptag	123.2	138.2	103.6	101.75	340.75	104.6	83.4	59.2
AGATAACGACAAGCCGCCGT	Standard	YER054C::chr5_3:uptag	396.6	452.8	395.5	332.5	926.2	476.25	282.4	169.6
AGATACGGAAATGGACGTTC	Standard	YER055C::chr5_3:uptag	121.8	98.2	113.2	120	126.6	126	102.6	94.6
AGATACTTAACCATAGCGCC	Standard	YER056C::chr5_3:uptag	547	394.2	495	504.8	837.8	574.4	274	196.2
AGATAGACAACGGGAGCTTC	Standard	YGR121C::chr7_4:dntag	1454.2	1225.6	1373	1529.8	2351.4	1868.2	1134.4	1153.8
AGATAGTGAAATGGCGATCC	Standard	YCL022C::chr00_12:uptag	1888.8	1785	2568.25	2332.6	3317.4	2444.6	1242.4	1288
AGATCAACCAACCATCGTGG	Standard	YDR028C::chr4_3:uptag	71.8	75.4	68	68.4	88.4	72.4	53.4	49.2
AGATCAAGAACGACGGCGCT	Standard	YER103W::chr00_5:uptag	76.4	70.4	85.25	76.5	88.5	89	54	54.2
AGATCCATAAATGTCTCGCC	Standard	YCL023C::chr3_1/chr00_12:uptag	2623	2201.2	2692.75	2455.4	3831.4	2345.6	1514.8	1428.4
AGATCCCAACATACCAGGTG	Standard	YDR029W::chr4_3:uptag	80.75	78.8	70.4	64	90.2	76.6	55.8	45.6
AGATCCTGAAATCGCTGACA	Standard	YNL087W::chr00_16b:uptag	1301.4	1240.4	1280.4	1324.6	3029.4	1988	693.8	767.4
AGATCGCTAAATGAGGACCC	Standard	YCL024W::chr3_1:uptag	2330.2	2307.2	2337.5	2596	3761.2	3193.6	1365.2	1369.6
AGATGAAACGAGCATGGCCT	Standard	YDR153C::chr4_5:dntag	362.5	336	473	569	1355	1002.6	299.4	360.6
AGATGAACCAAGGATCGGTC	Standard	YCL025C::chr3_1:uptag	160.6	153.8	187	156.6	184	146.6	99.8	92
AGATGATGAAATCGTCTCCC	Standard	YCL026C::chr3_1:uptag	68	62.4	75	80	96.25	82.2	56	55
AGATGCGAACAGCGTTACAC	Standard	YER104W::chr00_5:uptag	134.5	132.6	105	101	334.2	126.5	86.4	65.8
AGATGCGCCAAGAACATTTC	Standard	YDR487C::chr4_8:dntag	91	102.8	87	89	164.8	82.75	68	59.8
AGATGGGAACATACCTACCG	Standard	YER159C::chr00_5:uptag	59.8	56.2	53.75	62	78	64	45.4	47
AGATGTCGAAAGTGTTCACC	Standard	YER161C::chr00_5:uptag	93.4	82.6	77	91.2	139.25	119	67.2	64.6
AGATGTTTAACGTAACCCGC	Standard	YER162C::chr00_5:uptag	554.2	441.8	547	405.2	402	715.4	532.2	304
AGATTAGAACATGATCGCCG	Standard	YER163C::chr00_5:uptag	1390.2	1140.6	1523.2	1390.8	2327.4	1763.2	1093.8	1069.6
AGATTAGTAAATGCTGCGCC	Standard	YCL027W::chr3_1:uptag	1006	1085.4	1146	1140.8	1687.2	1256.8	573.6	610.8
AGATTGTAACAGGCAGACCG	Standard	YML108W::chr00_9:uptag	491.8	447.6	403	333.2	870.75	567.6	348.4	299.6
AGATTTGCACAGATAACGCG	Standard	YML107C::chr00_9:uptag	502.2	484	505	459	801.8	482.8	394.4	305.8
AGCAAACCCAACATCGGTGG	Standard	YGL123W::chr7_2:uptag	97	86	113.4	102.6	169.8	98.4	93.8	87.2
AGCAAACTAAGAGCCGGGTC	Standard	YCL028W::chr3_1:uptag	3151.2	2988.6	3801.4	3440.6	2593.75	4050.4	1280.8	1463
AGCAAAGAACCATGCCGCGT	Standard	YDR154C::chr4_5:dntag	145.8	128.4	113	103.6	356.4	121	95.4	63.8
AGCAAAGCAACAGTCCGTCG	Standard	YML106W::chr00_9:uptag	317.8	346.8	271.2	250	806.2	312.8	226.4	126
AGCAAATCTAAGCACCGCGT	Standard	YGR122W::chr7_4:dntag	296.6	168.6	626.4	539.6	498	349.8	143.4	91.2
AGCAAATTAACACTTGGGCC	Standard	YGR022C::chr7_3/chr00_12:dntag	1703.6	1357.4	1795	1684.2	2791.8	2419.8	1622.8	1811.6
AGCAACATAAGACGCGGGCT	Standard	YGR123C::chr7_5:uptag	4048.8	3649.4	4629	4450	5528	5280.8	1736.2	1791
AGCAACTAAGAGACCGGCTG	Standard	YGR124W::chr7_5:uptag	968	902.6	1258.6	928	2032.25	1524.6	450.4	412.4
AGCACAAGAACTACGCGCTG	Standard	YML105C::chr00_9:uptag	87.2	96	77	75.6	101.2	83	59	55.4
AGCACACCAAATTCTACGGG	Standard	YDR030C::chr4_3:uptag	179.8	164.2	134.2	131	254.8	143	94.4	89.8
AGCACCCAACATAATTTCGG	Standard	YGR125W::chr7_5:uptag	2377	1874	2743.75	2494.2	3246.4	1873	1247.4	1388.8
AGCACGAACCAAGGCACGTT	Standard	YLR104W::chr12_2:uptag	2211.8	2067.6	1676	1539.33	3089.6	2132.25	991.6	987.6
AGCACGGAACAGTAAGCCCT	Standard	YLR105C::chr12_2:uptag	156	177	127.8	128.5	411.4	151.6	112.4	77.6
AGCACGTTAAATCTCCACAG	Standard	YML048W::chr13_1b:uptag	260.8	270.4	224.4	232.8	658.8	243	187.6	135.2
AGCACTCAACAGGACGACGT	Standard	YML048W-A::chr13_1b:uptag	350.2	310.2	414.4	296.25	651.2	380	164.2	152.2
AGCACTCTAAATGACTACCG	Standard	YLR370C::chr00_11:uptag	185.2	76	197.4	130	325	239.4	65.8	54.2
AGCACTTGAAATTAAGCGCC	Standard	YDR488C::chr4_8:dntag	1911.2	1531.2	1680.6	2080.4	3787.4	3302.8	1909.8	2088.2
AGCAGAAGAACGAGGCTTTC	Standard	YCL029C::chr3_1:uptag	711.2	624.4	652.6	812.75	1055	844.2	261.8	216.4
AGCAGAGGAACCCAACTCGT	Standard	YLR106C::chr12_2:uptag	84	79.4	88.4	96.3333	115.4	83.2	60.8	54
AGCAGGGTAAATCAATCTCC	Standard	YDR489W::chr4_8:dntag	58.2	58.6	64.75	63.4	84.2	66.4	53.4	55.4
AGCAGGTGAAATCGTACTAC	Standard	YMR009W::chr13_2:uptag	195.2	167.8	133.8	184.4	445.2	282.4	106.4	93.6
AGCAGTGCAAATCCTGATAC	Standard	YCL030C::chr3_1:uptag	67.2	68.2	72.2	73.6	100.75	76.4	56	54.2
AGCAGTTTAACGCGCAAGAC	Standard	YMR010W::chr13_2:uptag	4057	3622.8	3473.6	3832.4	5577.6	3968	1839.6	2040.2
AGCATACAACCGACCAGGGT	Standard	YGR126W::chr7_5:uptag	181.6	179.25	162.4	186.8	432.8	205.4	125.2	97.8
AGCATACGAAATTCACTCCG	Standard	YMR011W::chr13_2:uptag	1162	894.25	1152	1165.8	2203.4	1439.8	663.8	676
AGCATATAACCACTGATCCG	Standard	YMR012W::chr13_2:uptag	1391.6	1314	1450	1391.8	1813.6	1844.2	501.6	473.8
AGCATCATAACCCAAGCTGG	Standard	YGL124C::chr7_2:uptag	214.2	167.6	227.4	162.6	351	190.6	154.4	152.6
AGCATCGGAAATGGCAAGCC	Standard	YGR023W::chr7_3:dntag	1978.6	1638.4	2151.8	2642.2	4498.2	3219.2	2464.8	2342.8
AGCATGAACCAGACTACCTG	Standard	YER119C-A::chr00_5:dntag	505.6	453.2	603	611.5	318.8	610.6	570.8	365.8
AGCATTACAACCATACTGCG	Standard	YER120W::chr00_5:dntag	2087.6	2235	2633.6	2398.8	2642.25	3086.8	2204.2	2008.6
AGCCAAATCTACTACACGGT	Standard	YGR127W::chr7_5:uptag	347.8	333.4	429	400.8	365.6	358.6	167	146.8
AGCCAACCATCAATACGGGT	Standard	YGR128C::chr7_5:uptag	96.6	101.8	86.2	85.6	116	88.8	62	56.2
AGCCAACGAACCTACATGGG	Standard	YDR031W::chr4_3:uptag	347	352	294.2	249.4	724.2	561	271.6	278.2
AGCCAAGAACGAGAGCGTCT	Standard	YER121W::chr00_5:dntag	193.2	177.4	182.75	169.5	470.75	280.75	155	120.8
AGCCAATCAACCACTGTAGG	Standard	YDR032C::chr4_3:uptag	172.5	228.6	166.8	162.5	525	173.6	135.4	78
AGCCACGTAAATCGTTAGAC	Standard	YER122C::chr00_5:dntag	103.2	126.6	100	94	194.2	99.75	72.8	64.4
AGCCACTGAAATGATACTCC	Standard	YCL031C::chr3_1:uptag	118.6	137.8	122.6	105.8	257	120	91.4	69
AGCCAGACAAGAGACCTGCT	Standard	YLR107W::chr12_2:uptag	602.4	522.6	502.6	507.25	1307.75	554.4	421.8	454.6
AGCCATAGAACCTAAGGCCG	Standard	YDR033W::chr4_3:uptag	344	366	273.4	271.6	956.75	392.4	274	191.2
AGCCATTCAAATTACACGCG	Standard	YDR034C::chr4_3:uptag	84.75	84.4	90	77.5	101	76.4	56.4	49.8
AGCCCGAGAAATCTAGTACC	Standard	YMR129W::chr00_9:uptag	2743.2	2696	2778.4	3058.4	4625.6	3570	1605.6	1599.4
AGCCCGGTAAATCGTGCAGA	Standard	YDL227C::ctrl_53:uptag	3602	3405.8	3497.2	4200.4	4680.25	4038.4	1937.4	1921.2
AGCCCTATACAACCATGAGG	Standard	YDR035W::chr4_3:uptag	2405	2378.8	2419.2	2051.75	2034.8	2109.8	1106.4	1076.8
AGCCCTCAACAGGCAGGAAT	Standard	YGL150C::chr7_2:dntag	119.75	139.4	103.8	99	291.6	137	82.6	62.8
AGCCCTCGAAAGTTATTCAC	Standard	YCL032W::chr3_1:uptag	234.8	202.6	297.8	311	330.2	321.25	146.4	152.2
AGCCCTTAACACTTCGTAGA	Standard	YMR130W::chr00_9:uptag	3205	3016.6	3680.8	3030.4	3897.6	3557	1661.2	1521.4
AGCCCTTAACCGGGTAGGA	Standard	YNL061W::chr00_16b:uptag	61.8	61.4	58.4	54.25	94.8	71.8	48.8	41.8
AGCCCTTCAAATCTCGATAG	Standard	YDR036C::chr4_3:uptag	2881.75	2535.6	2788.2	2808.25	3171.8	2927	1572	1598
AGCCGAAGAACCATAGCTCG	Standard	YMR131C::chr00_9:uptag	188.6	192.8	164.4	168.5	570	194.8	140.6	83.2
AGCCGACAACAGGCACAGTT	Standard	YLR108C::chr12_2:uptag	249.6	290.2	202.6	216	601.4	260.75	184	103.2
AGCCGCACAAATTCGATACG	Standard	YMR132C::chr00_9:uptag	3083.6	2467.8	2628.2	2612	3978.5	2198.8	1151.4	1009.6
AGCCGGAACCAGAGAGACTT	Standard	YLR109W::chr12_2:uptag	354.6	364.4	336	307.4	902.4	394.8	300.6	267
AGCCGGGAACACTTTCGACT	Standard	YLR110C::chr00_15:uptag	874.4	590.8	931.8	925.8	712.6	727.2	405	296.8
AGCCGGGCAAATGCTACACA	Standard	YLR178C::chr12_3:uptag	1848	1661	2057	2119.4	2033.4	1860.8	1078.8	1147.6
AGCCGGTCAAACCAACATTG	Standard	YGL125W::chr7_2:uptag	64.6	69.8	71.4	66.4	115	72.4	54.2	48.4
AGCCGTAGACAAGACTAGCG	Standard	YMR187C::chr13_4:uptag	2646.4	2222.6	2638.8	2136	3642.8	2261	1331.4	1188.2
AGCCGTATAAATCACAGTCC	Standard	YMR188C::chr13_4:uptag	217.6	252.6	185.25	176.4	626.6	221.6	159.6	93.4
AGCCGTCGAAATCCTGTACG	Standard	YMR189W::chr13_4:uptag	3291	3094.2	2933.5	3370.25	4153.4	4416	1778.2	1661.6
AGCCTAAATGGGTACAACCG	Standard	YGR129W::chr7_5:uptag	2872.2	2496.8	2978	3267.4	4070.8	2622.2	1282	1165.8
AGCCTAGCAAATGTAGTACC	Standard	YMR190C::chr13_4:uptag	123.4	109.8	100	133.6	185	166.8	89.4	86
AGCCTAGTACAAATTCTGCC	Standard	YCL033C::chr3_1:uptag	68.4	61.6	67.6	69	90.5	80.2	54.6	55
AGCCTATCACAACCGAGAGG	Standard	YGR130C::chr7_5:uptag	459.8	414.4	418.8	312.5	1032.6	483.8	226	161.6
AGCCTCACAAATCTTTACGG	Standard	YDR037W::chr4_3:uptag	71.4	73.8	80.8	80.8	98.2	71.6	57.8	63.4
AGCCTCGTAAATCTCTCAGA	Standard	YMR158W::chr00_8:dntag	81.8	79.6	83.25	87.2	117.6	89.2	68.6	63.8
AGCCTGCGAAATCTACTGAA	Standard	YNL085W::chr00_16b:uptag	1194.8	975.4	1007	1245.6	2883	1038.2	576	604
AGCCTGGAACAGCTATACAC	Standard	YMR158W-A::chr13_4:dntag	1305.4	1303.2	1333	1757.4	1935	1492	1291.6	1008.8
AGCCTTATAGAACCAGCTAC	Standard	YMR159C::chr13_4:dntag	561.4	568.4	532.75	642.6	989.6	530	440	431
AGCCTTTCAACCCAGGGAGA	Standard	YGL253W::chr7_3:uptag	1013.25	870.2	1119.2	1086.6	1503.8	548.2	387	438.2
AGCGAAGCAACCAGCATTCT	Standard	YDR155C::chr4_5:dntag	353.4	347	373.2	388	863.8	400.2	274.8	186.8
AGCGACATAACGCAACCTGG	Standard	YMR160W::chr13_4:dntag	57.6	53.8	58.4	68.2	85.4	58.4	47	42
AGCGACGTAAATGACCTACC	Standard	YMR218C::chr13_4:dntag	60.8	56	56.6	57.6	81.25	63	52.6	47.4
AGCGAGCTAAATGCTGGACA	Standard	YNL084C::chr14_3:uptag	441	295.8	431.25	394.6	569.6	427.2	384	382.2
AGCGAGTCAAATGTATCGAC	Standard	YMR219W::chr13_4:dntag	1079	1121	1054.6	1162	2535	1375.6	1538	2006.2
AGCGATAGAACCGGACACCT	Standard	YMR220W::chr13_4:dntag	61.4	59.6	62.2	66.2	77	70.8	52.2	47
AGCGATTCAACCCACAATGG	Standard	YGL126W::chr7_2:uptag	1200.2	828.2	1098.6	1251	2102	804.2	496.4	480.2
AGCGCACGAAATTGCACTAC	Standard	YMR221C::chr13_4:dntag	2911	2650.2	2575.8	3023.2	5264.4	5034	3405.8	3232.2
AGCGCAGTAAATAGCTTAGC	Standard	YAL020C::chr1_1:uptag	2760.8	2461	2467.8	2742.4	3583	2620.4	1509.6	1583.4
AGCGCATAAAGCGACACGT	Standard	YAL019W::chr1_1:uptag	299.2	362.2	296.8	469.75	478.75	687.5	174.4	185.6
AGCGCATTAACCCAGCAGAG	Standard	YDR041W::chr00_16b:uptag	245.4	382.8	216.6	194.4	604.2	256	172.6	94.2
AGCGCCCAACATCTGAGAAG	Standard	YDR042C::chr4_3:uptag	104	119	102.4	91.4	199.4	102.5	66.4	53.8
AGCGCCCTAAATGGTAAGAC	Standard	YCL034W::chr3_1:uptag	123.8	109.4	112.2	119.8	236.6	157.2	65.2	61.2
AGCGCGAACCACGTTTAAGA	Standard	YGR131W::chr7_5:uptag	2478.6	2421.4	2496.4	3105.4	3606.5	2497.4	1426.8	1336.4
AGCGCGTGAAATGCACATAC	Standard	YAL018C::chr1_1:uptag	2330.2	1997.6	2690	3031.2	2951.2	3138.2	1519.2	1497
AGCGGACAACAGTCTACACG	Standard	YAL017W::chr1_1:uptag	956	572.8	756.5	716	1624	1233	425.8	410.8
AGCGGACTAAATATAGGTCG	Standard	YER030W::chr5_3:dntag	1100.4	1009	998.8	1032.8	962	732	1300	1261.8
AGCGGAGGAACCAGTAATCC	Standard	YDR071C::chr00_11:uptag	1210.2	996.2	1619	2313.6	1070.8	1107.8	496	331
AGCGGATCACAACGAAGCTC	Standard	YGR132C::chr7_5:uptag	85.6	103.4	91.6	98.8	147	117.6	75.2	62.8
AGCGGCATACAACGGAAGCT	Standard	YLR111W::chr12_2:uptag	634.4	317.4	419.2	468.2	624.8	271.2	175.2	158.2
AGCGGCGAACAGCTCGATAA	Standard	YER032W::chr5_3:dntag	681.4	549.4	671.4	722.6	1432	899.6	606.4	487.4
AGCGGGACACAACCGATACT	Standard	YER033C::chr5_3:dntag	1731.4	1289.6	1881.67	1794	2495.6	1799	1661	1452.6
AGCGGGTGAAATGACTATAC	Standard	YER085C::chr5_3:dntag	1667.2	1412.6	1432.75	1729.6	2496.8	1793.8	1747	1623
AGCGGTCAACACCACTAGAG	Standard	YER086W::chr5_3:dntag	172.2	183	154.75	146.25	529.4	164	116.2	73.2
AGCGGTCCAAATGACAGACG	Standard	YER087W::chr5_3:dntag	103.2	110.4	107.6	99.5	316.4	102	78.2	64.4
AGCGGTGGAAATGCTTACAA	Standard	YLR179C::chr12_3:uptag	207.4	160.5	214.6	194.2	290	217.25	112.6	114
AGCGGTTTAACGTCAACGCA	Standard	YER087C-A::chr5_3:dntag	2526.4	1807.2	2469.8	2356.8	3853.4	3482.2	2309.6	2279.4
AGCGTAGAACAGTATATCCG	Standard	YHL003C::chr8_1:uptag	2367	1972.6	2040.6	2430	4254.25	3112.4	1205.4	1319.6
AGCGTATAAGAAGAGGTCCT	Standard	YHL002W::chr00_10:uptag	2286.6	1944	2077.25	2516	4046.8	2767.4	995.8	1153.2
AGCGTATGACAACGAACTGG	Standard	YGR133W::chr7_5:uptag	1961	1327.6	1856.6	1680.6	1705.6	1377.4	834.8	870.4
AGCGTCACACACAAGACTGG	Standard	YGR134W::chr00_8:uptag	968.2	667	936	932.6	1285.4	733	524.2	397
AGCGTCTGAAATGCTATCAC	Standard	YHL035C::chr8_1:dntag	1826.8	1327.4	1717	1944	2715.8	1837.6	1793.8	1785.6
AGCGTGATACAACCTGATAC	Standard	YHL034C::chr8_1:dntag	1194.6	1286.6	1501.75	1493	2153	1696.25	1618.4	1468.4
AGCGTGGCAAATGGTCACAA	Standard	YLR180W::chr12_3:uptag	3591.6	3247.5	3582	3785.6	4295.6	3732.5	1731.4	1812
AGCGTTACAACAAGTGGACC	Standard	YHL033C::chr8_1:dntag	717.2	495.4	654.8	659	663.6	561.2	853	627
AGCGTTCTAAATGCGTCACA	Standard	YHL032C::chr8_1:dntag	2539	2761.8	3476.2	3356.8	4388	4087	2813.8	2785.4
AGCGTTGCACATACAAGACC	Standard	YER063W::chr00_10:dntag	96.2	90	104	99.8	223.2	128.4	82.4	87.4
AGCGTTTGAACAGGACCACA	Standard	YNL083W::chr00_16b:uptag	80.2	91.6	82.4	91	263.2	106.5	67.6	58.6
AGCTAACCAGAATACGCGCT	Standard	YHR028C::chr8_1:dntag	1151.2	1074.6	1243.4	1328	2331.6	1399	1300	1092
AGCTAACTAACCCAGAGCGG	Standard	YHR029C::chr8_1:dntag	432.2	375.25	512.4	377	921	363.2	293	243.8
AGCTACAACCAACTCAGGGT	Standard	YLR112W::chr12_2:uptag	315.4	265.6	262.6	276	395.6	385	162.6	134.2
AGCTACAGAACGCTACACGG	Standard	YPL244C::chr16_1:uptag	93.8	91	82.6	89.4	162	115.4	65.6	54.4
AGCTACCAACAGTCCTAGAG	Standard	YPL243W::chr16_1:uptag	287.4	327.6	233.25	242.75	707	298.5	198.4	106.4
AGCTACTAACAGGTATAGGC	Standard	YGR135W::chr7_5:uptag	78.2	85	80	70.4	90	79.4	56.8	49.2
AGCTAGGCAAAGTTTACCAC	Standard	YCL036W::chr3_1:uptag	164.8	154	243.4	201.2	289.6	294.6	85.6	84.2
AGCTAGGTAAATTCAGAGCC	Standard	YCL037C::chr3_1:uptag	81.8	76.75	80.2	93	285.2	91.4	67	54.4
AGCTATATCAAGCGAGCGTC	Standard	YPL242C::chr16_1:uptag	77	80	72.6	66.5	89	70	64.2	57.8
AGCTATGCAAATTAGAGGCC	Standard	YDR490C::chr4_8:dntag	1348.4	1081.6	1354.5	1634.2	3161.8	2004.2	1680.8	2065.4
AGCTATTAACAGTAGACGCG	Standard	YPL241C::chr16_1:uptag	67.2	70.8	66.8	61	70	78.2	48	49.2
AGCTCAGGAAATTCTAGCGA	Standard	YNL082W::chr00_16b:uptag	816	872.6	930.2	1101.5	1798	1858.6	489.4	426.4
AGCTCCAAATCTTAGACACG	Standard	YGR136W::chr7_5:uptag	2911.6	2662	3190	2934.4	4722.6	3305.8	1291.2	1301.2
AGCTCCCGAAATGCAAGACG	Standard	YDR043C::chr4_3:uptag	278.2	252.6	258.4	239.2	429	280.8	126.6	118
AGCTCCGCAAATGGGCTACA	Standard	YLR181C::chr12_3:uptag	2736.4	2397.8	2235	2621	4336.6	3374.4	1324.4	1582.6
AGCTCGTAACATGCGATAC	Standard	YOR055W::chr15_1:uptag	1337.75	1157.6	1003.8	1194.8	1951.8	1915	654.4	715.6
AGCTCTGAACAGTAATACCC	Standard	YPL222W::chr16_1:dntag	1015.2	754.8	841.8	943.6	2583	1652.6	1119.8	1132.4
AGCTGAACAATAAGCGGCC	Standard	YDR491C::chr4_8:dntag	60.8	67.2	65	61.6	90.2	65.2	48.8	52.4
AGCTGACGAAATCTTCACAC	Standard	YPL221W::chr16_1:dntag	2553.6	1671.6	1951.2	2627.4	4841.5	3857.6	2837.4	2567.4
AGCTGAGAACAGTGTAGACT	Standard	YPL220W::chr16_1:dntag	1182.25	1051.8	855.6	1267.5	2401.2	2552	1640.8	1541.4
AGCTGATCCAAGCAACGTAC	Standard	YPL219W::chr16_1:dntag	1831.6	1638	1660.2	1617.6	2796.2	1408.4	1916	2132
AGCTGATTAACCCGTAAGAC	Standard	YDL227C::ctrl_33:dntag	4357.4	3989.2	4168.6	4842.6	6559.6	5185.8	3882.4	4005.2
AGCTGCAAATGCCATGAACC	Standard	YGR024C::chr00_14:dntag	136.8	149.6	120.6	125.6	477.8	150.8	92.4	66.8
AGCTGGAAATGGTGCATAAC	Standard	YGR137W::chr7_5:uptag	259.6	211.25	262	282.6	384.8	330.4	169.8	157
AGCTGGCTAAATGGAATACC	Standard	YDR492W::chr4_8:dntag	1508	1438	1744	1765.4	3635.8	2573.8	1746.8	2196.4
AGCTGGGCAAATTAAGTACC	Standard	YDR493W::chr00_17a:dntag	1070.6	691.8	963	1070.4	2537.2	1777.8	1130	1255.4
AGCTGGGTGCAAATAGCGAT	Standard	YLR114C::chr12_2:uptag	146.6	133.6	165.2	200.8	473.75	276.2	122.4	148.8
AGCTGTAAATGTATGACCCG	Standard	YNL314W::chr14_1:uptag	920.8	792.2	766.8	926.5	2159.6	1041.6	366.4	389.6
AGCTGTAGACAACTATACCG	Standard	YNL313C::chr14_1:uptag	71.4	66.6	65.8	72.5	98.2	75.2	51.8	50.8
AGCTGTGGAAATGTCCGACC	Standard	YDR074W::chr00_11:uptag	65.6	64	62.6	69.4	77.8	95	46.8	49
AGCTGTTCACAAATTGGACC	Standard	YGR138C::chr7_5:uptag	60	56.6	64.4	64.4	84.8	68.8	52	47
AGCTTAACATACAATCGGCG	Standard	YGR139W::chr7_5:uptag	1562	1662.4	1989	1877.8	2879.2	1819.8	826.8	890.6
AGCTTACGAACCAGTAGACC	Standard	YNL312W::chr14_1:uptag	143	124.2	123.8	94.8	379	131.6	90.8	66
AGCTTAGTAAATCTGTGCCC	Standard	YCL039W::chr3_1:uptag	745.2	616.4	799.4	900.75	951.2	460.5	387.6	362
AGCTTCAACAGTAATCACCG	Standard	YGR140W::chr7_5:uptag	78.8	88.2	77.4	67.5	149	78.6	61.6	55.8
AGCTTCGCAAATCTGGTACA	Standard	YNL081C::chr14_3:uptag	287.8	190.4	663.2	949.25	1096.25	722	141.4	143.8
AGCTTCTTAACCCACGTAGA	Standard	YNL255C::chr14_1:uptag	132.4	132.2	139.4	135.8	198.4	148.8	82.2	75
AGCTTGAAATAGCCATACCT	Standard	YLR113W::chr12_2:uptag	983	730.6	883	945.4	1513	1021	353	320
AGCTTGCACAGTAACCATGA	Standard	YNL080C::chr00_16b:uptag	248	288.8	210.2	176.75	603.8	228.6	159.4	83.2
AGCTTTGTAACCCAATACCG	Standard	YDR044W::chr4_3:uptag	63.3333	51.6	51	46.75	66.4	60.6	46.4	41.4
AGGAAAGAACCCGAGCGTCT	Standard	YLR115W::chr12_2:uptag	76.6	75.4	77.2	66	95.25	77.6	50.2	47.8
AGGAAATCAGTGGAACCCGC	Standard	YGR141W::chr7_5:uptag	3426.75	2650	3627.2	3311.75	4124	2175	1757.8	1763.2
AGGAAATTGCAGGAACCCTT	Standard	YGR142W::chr7_5:uptag	2044.8	1941	2196.6	2696.6	3342	3137.4	1287.8	1312.8
AGGAACAGGGCGACAACCTT	Standard	YDR156W::chr4_5:dntag	471.75	393.8	558.2	762	859.4	651.6	412.6	402.6
AGGAACGTAACCATCAGTCC	Standard	YNL254C::chr14_1:uptag	1357.8	1642	1801.8	1574.2	2749.25	1777.4	724.6	634.8
AGGAACTCAACCAGGGTACG	Standard	YNL253W::chr14_1:uptag	879.4	765	835.4	959.5	1422.6	861	408.6	460.4
AGGAAGATAACGATGTCTCC	Standard	YNL252C::chr00_8:uptag	53.4	49.6	56.5	52.2	71.8	56.2	43.8	47
AGGAAGCTAACCATCTACCG	Standard	YNL299W::chr14_1:dntag	2531.8	2264	1755	2352.2	3042	2769	2057.8	2222.4
AGGAAGTTAAGCGAACCGCC	Standard	YCL040W::chr3_1:uptag	54.8	55.8	59	58.6	73	60.8	47.8	46.2
AGGAATACAACTACCTCTCG	Standard	YNL298W::chr14_1:dntag	430.4	283	176	186	536.333	527	265.6	357.2
AGGAATAGAACATTGGCGCT	Standard	YDR157W::chr4_5:dntag	49.4	47.4	50.6	51.4	62.8	51.2	44.8	41.8
AGGAATCGAACCAGCGCGTA	Standard	YNL296W::chr14_1:dntag	103.2	104.4	87.4	89.6	202	100	73.2	64.2
AGGAATCTAACCACGCGCAG	Standard	YGR143W::chr7_5:uptag	366.4	393.2	416	337.75	840	485.4	237	166.4
AGGACAACCGAGCACACGTT	Standard	YGR144W::chr7_5:uptag	1222.4	1015.4	1437	1397.6	1542	1237.8	663.6	618
AGGACAAGAACCGTACCCGT	Standard	YGR145W::chr00_15:uptag	55.8	62.4	64	72.4	65.25	56.2	48.6	44
AGGACAGAACCATCTAGCCT	Standard	YGR146C::chr7_5:uptag	1178.4	1043.4	1408.2	1432	2348.6	1213.8	609.4	556.6
AGGACATCAACGAAGGCTCC	Standard	YCL041C::chr3_1:uptag	59.6	54.5	61.2	63.6	90.2	63.8	50.2	42.6
AGGACCCGAAATTAGAGTCG	Standard	YNL297C::chr14_1:dntag	783.2	520	522	297.2	482.4	379.8	634.6	497
AGGACCGTAAATTCAAGTCG	Standard	YNL251C::chr14_1:dntag	50.6	51.5	53.8	46.6667	72.4	58.75	46	42
AGGACGATAACCAGTCACCG	Standard	YNL250W::chr00_8:dntag	125.4	112.6	92	102.6	300.25	125.6	86.2	67.4
AGGACTACAACCAGCCTGAG	Standard	YGR147C::chr7_5:uptag	261	262	238.6	203.8	631.4	259.4	187.8	89.2
AGGACTAGAACCATGAGTGC	Standard	YNL249C::chr14_1:dntag	704.8	564.8	625.4	721.8	1157.4	844.2	666	954.6
AGGACTCAACAGTATCACCG	Standard	YNL248C::chr14_1:dntag	90.8	93.2	80.5	97.5	153.4	83.75	65.6	58.4
AGGACTGGAAATTACTTGCC	Standard	YDR494W::chr4_8:dntag	1866.2	2120	2209.4	2530.2	2877.6	2620.2	2281.6	2513
AGGAGAAACCACCCACTTGG	Standard	YGL127C::chr7_2:uptag	107.6	123	96.2	92.8	361.6	104.4	83.8	59
AGGAGACGAACGAAGTTTCC	Standard	YMR271C::chr00_8:uptag	3152.6	3146.4	2651.6	2806	4907	3707.2	1195.6	1178.8
AGGAGAGCAACCTACACTCG	Standard	YMR272C::chr13_5:uptag	859	1000.8	649.2	1020.4	982.2	333	445.6	386.2
AGGAGCAACCATCATGCACG	Standard	YGR148C::chr7_5:uptag	223.8	191.8	315	296.4	409.4	209.4	141	173.4
AGGAGCGTAAATTATCAGCC	Standard	YCL042W::chr3_1:uptag	98.4	109.8	84.5	104.5	352.6	109.75	77.6	61.8
AGGAGTCTAAATGGGCTTAC	Standard	YCL043C::chr3_1:uptag	60.4	60.2	59	61.6	72.4	68.4	49.4	46.4
AGGAGTTCAAATGCTTGCAC	Standard	YDR495C::chr4_8:dntag	65.8	63.4	71.8	68	87.6	75.6	56.2	56.4
AGGATACCAACGACGACTCG	Standard	YMR273C::chr13_5:uptag	1063.6	961.8	725.6	889.75	1552.25	1159.6	532	498.6
AGGATAGTAACCACTCCACG	Standard	YMR313C::chr00_8:uptag	788.8	799.6	1250.75	1102.6	1012.8	914.4	304.8	232.4
AGGATATCCAACCATCCGT	Standard	YGR165W::chr7_5:uptag	59.4	59.2	71.4	65.3333	75.8	62	53.6	43.6
AGGATCTAACACTTGCTACC	Standard	YMR314W::chr00_8:uptag	70.6	62.4	65.2	73.2	96	76.6	60	53.6
AGGATCTCAAAGTTGTCGAG	Standard	YMR315W::chr00_8:uptag	3564.6	3283	3306.6	3673	4962.2	3900.2	2349.6	2292.6
AGGATGGCAAATGTGATACC	Standard	YDR496C::chr4_8:dntag	706.6	783.8	696.8	728	1707	1085.2	1085.8	1095.8
AGGATTAGAACCTACGCACC	Standard	YMR316W::chr00_8:uptag	2143.2	2178.2	2252	2054.2	3133.5	1778.4	1130.4	1056.4
AGGATTGAACATATCGACCG	Standard	YMR268C::chr13_5:dntag	67	64.4	69.2	67.25	86.4	68.4	54.2	52.6
AGGATTGCACAGGGAACTAC	Standard	YCL044C::chr3_1:uptag	94	88.4	83.6	79.6	177.6	105.4	71	56.6
AGGATTTCAACCCGACGAC	Standard	YCL045C::chr3_1:uptag	542.4	459	598.25	610.25	612.8	551.25	283.2	320.2
AGGCAAACACAGATGCGGCT	Standard	YDR158W::chr4_5:dntag	1147.4	920	1497.8	1213.8	1068.4	583.6	441.8	315.8
AGGCAAATCTTCAGAACCCG	Standard	YGR149W::chr7_5:uptag	2888.8	2600.2	3385	3408.4	4516.6	3134.2	1389.8	1402
AGGCAACATCAATACCTCGT	Standard	YGR150C::chr7_5:uptag	64.2	63	71.8	72.4	83.6	80.2	56	54.6
AGGCAACCATACAGACCTGG	Standard	YGR151C::chr7_5:uptag	1537.4	1315.4	1666.4	1420.8	1926.4	1555.8	658.2	644.6
AGGCAACTAACTACACGTCG	Standard	YMR269W::chr13_5:dntag	206.6	184.75	205.8	159.8	217.5	118.6	177.2	137
AGGCAAGTAACCGTACACCG	Standard	YMR270C::chr13_5:dntag	65.8	72.4	70.8	75.8	98	78.2	53.8	50.6
AGGCAATGAACCGTAAGTCC	Standard	YCL046W::chr3_1:uptag	702.8	624.6	776.2	883.5	1301	703	351	448.8
AGGCACAACCGGGAATACCT	Standard	YGR152C::chr7_5:uptag	3259.8	2788.4	3308.2	3680.8	4686.8	3973.4	1654	1442
AGGCACAGAACCGATCACGT	Standard	YMR271C::chr00_8:dntag	723.8	726.6	563.75	546.5	1969.4	1002.25	614.6	543.8
AGGCACCTAACCCAATGAGG	Standard	YGL128C::chr7_2:uptag	47.8	58.6	47.8	55.4	84.6	57	43	43.4
AGGCACTCAAATTGCGACAC	Standard	YCL047C::chr3_1:uptag	188.6	155.2	220.8	229.4	532	253.8	136.4	149.2
AGGCAGACAACTCAATCCGG	Standard	YDR045C::chr4_3:uptag	62.8	66.4	67.4	63.2	83.4	67	54.8	50
AGGCATCTAAATGTATGGCA	Standard	YGL254W::chr7_3:uptag	2252.2	2090	2365	2541	3932.4	3381.2	1378.4	1567.8
AGGCCAAATTATATCCACGC	Standard	YDR497C::chr4_8:dntag	961.2	939.2	1188.6	1088.8	1597.6	1254.6	840.8	820.2
AGGCCAGTAAATTCCTATCC	Standard	YDR498C::chr00_17a:dntag	57.5	60	69.6	57.25	82.6	64.6	52.2	47.6
AGGCCGAACCAGCACAGATT	Standard	YDR159W::chr4_5:dntag	267	319	236.4	207.2	623.8	245.2	180.8	89.6
AGGCCGTAAATGTCGGACT	Standard	YLR116W::chr12_2:uptag	97.4	83.2	90	81.4	133.2	77.4	81	71.4
AGGCCGTAACAGGCGTTCAA	Standard	YNL079C::chr00_16b:uptag	283.4	258.6	218	240.2	489.8	402.2	161.8	126.2
AGGCGAAATTATTGACACCG	Standard	YDR046C::chr4_3:uptag	2345	2172.6	2151.4	2370.2	3929.8	1958.2	1194.6	1446.4
AGGCGCTAACAGTCCAGAAC	Standard	YMR311C::chr00_8:dntag	236.8	289.4	208.75	186.4	599.8	273.2	171.6	98.6
AGGCGCTTAAATGTGGATAC	Standard	YCL048W::chr3_1:uptag	2392.2	2498	2559	3068.4	4414	3064	1381	1607.2
AGGCGGATAAATGTTACGAC	Standard	YMR312W::chr00_8:dntag	545	353.6	645.2	540	479.4	286	394.4	548.6
AGGCGGCAACAGTATGTAAC	Standard	YMR313C::chr00_8:dntag	904.6	764.75	1151	1435	2609.75	1724	998.8	788.8
AGGCGGCGAAATGTCATCAA	Standard	YLR182W::chr12_3:uptag	128.2	56.8	215.6	86.2	63.75	55.5	107.2	84.6
AGGCGGTCAAATCTTCTCAA	Standard	YLR183C::chr12_3:uptag	69.4	75.8	78	80	131.4	85.75	58.6	52
AGGCGTACACAACGGTATAG	Standard	YMR314W::chr00_8:dntag	96.6	107.6	97.2	83.2	147	84.5	62	57.8
AGGCGTATAGAACTAACTGG	Standard	YJL188C::chr10_1:uptag	57.8	55.6	57	57.4	77.6	63.6	48.4	43.8
AGGCGTCAACACAGCCAGAT	Standard	YGR153W::chr7_5:uptag	229	243	183.6	169.75	449.6	201.75	126.8	74.2
AGGCGTGTAAATTATTCGCG	Standard	YJL187C::chr10_1:uptag	3445.2	3427.6	3518.2	3994.4	5349.8	4033.6	1728.8	1792
AGGCTAACATATTATCCCGC	Standard	YGR154C::chr7_5:uptag	378.2	311.2	538.6	458.5	825.6	386.2	217.2	279.6
AGGCTAAGAACGCACACTCG	Standard	YJL186W::chr10_1:uptag	2746	2975	2560.8	2729.6	3658.2	2990.6	1221	1415.6
AGGCTACCAACCCTTAATAG	Standard	YDR047W::chr4_3:uptag	63	57.4	67.8	65.6	85.4	70.6	51.2	49.4
AGGCTATAAGAAGCGACCCT	Standard	YLR117C::chr12_2:uptag	75	67.6	75	75.75	91.8	88.4	53.8	50.2
AGGCTATTACAACCTACTGC	Standard	YGR155W::chr7_5:uptag	68.6	61.6	62.8	71.8	78.6	70.6	51.6	47.6
AGGCTCACAGAACCTACTAG	Standard	YGR156W::chr7_5:uptag	255.6	296	227	209	624.25	258.8	187	101.6
AGGCTCAGAAATGTGTCACC	Standard	YCL049C::chr3_1:uptag	3186.8	2798.8	3054.8	3522.2	4620.6	2750.6	1471.8	1467.8
AGGCTCCTAAATTGCGTACA	Standard	YNL078W::chr00_16b:uptag	2814.6	2312.8	2802.6	3162.6	3960.75	2651.6	1541.4	1582
AGGCTTGAACATCACATACC	Standard	YCL050C::chr3_1:uptag	2055.8	1928.4	2909.2	2968.4	3066.6	3227.25	1095	1070
AGGCTTGGAAATTCGTGACA	Standard	YLR184W::chr12_3:uptag	452.6	492.8	698.25	756.2	623	423.4	350	377
AGGGAAACACATGGACCGCT	Standard	YDR160W::chr4_5:dntag	59.6	73.4	65.2	68.8	99	67.6	55.2	47.8
AGGGAACGAACGACACTTCT	Standard	YJL185C::chr10_1:uptag	2349.4	2338.2	2212.4	1923	3582.6	3443.2	1213.6	1100.4
AGGGAATTAAATCTCGTCCG	Standard	YDR048C::chr00_16b:uptag	1672.25	1460.2	1608	1860.25	2391.6	1547.4	1048.2	1102.6
AGGGACATAACGGGAATTTC	Standard	YDR499W::chr4_8:dntag	59.4	54.2	54.4	62.2	73	62	43.4	43.6
AGGGACCAACAGTTACGACG	Standard	YJL136C::chr00_14:uptag	271.4	265	286.8	274.4	704.6	226	171.4	157.8
AGGGAGCAACATACGATCCT	Standard	YGR157W::chr7_5:uptag	356.8	246.2	415.4	287	168.2	210.5	271.8	126.6
AGGGAGTCAAATTGGTACAC	Standard	YCL051W::chr3_1:uptag	1146.2	906.6	1280.2	1507.8	1735.6	1086.2	429.2	385.4
AGGGATAACCATGCACACCG	Standard	YDL191W::chr4_3:dntag	168	194.6	245.8	242.8	423.2	173.4	159	143.8
AGGGATTAAGAAGGTCTACC	Standard	YCL052C::chr3_1:uptag	49.6	45.2	49.8	51.6	56.2	49	40	38.8
AGGGCAAATTGGAGACACCC	Standard	YGR158C::chr7_5:uptag	64.6	54.2	63.8	63.2	80.6	67.2	46.6	47
AGGGCCAGACAATACACCGT	Standard	YLR118C::chr12_2:uptag	139.2	157.2	137.8	121.6	305.8	131.8	96.8	62.4
AGGGCCGTAAAGTTGTTATC	Standard	YCL053C::chr3_1:uptag	59	62.6	63.6	61.75	80.8	83.6	51.4	50.2
AGGGCCTGAAATTCTCCCAA	Standard	YGR030C::chr7_4:dntag	45.4	42	48.4	44.4	50.8	44.4	39.2	38
AGGGCTACAGAAGAATCTCT	Standard	YGR159C::chr7_5:uptag	83.6	83.6	79.2	71	106.4	82.8	55.8	50
AGGGCTCTAAATGGTTCACA	Standard	YLR185W::chr12_3:uptag	86.5	73.4	122.25	122.4	89.2	82	65	54.6
AGGGCTTCAAATGTCTCCAA	Standard	YGL255W::chr7_3:uptag	150.75	143.6	213	205.6	683.4	290.4	66.6	58.2
AGGGTAACATAGCATACGCG	Standard	YGR160W::chr7_5:uptag	66.8	66.4	68.2	66.4	101.6	74	55.6	54.8
AGGGTAAGAACCTATACGCC	Standard	YJL135W::chr10_1:uptag	2158.4	1682.8	1573.2	1530.8	3461	3030.8	1263	1218.8
AGGGTCAACCAGGACACACT	Standard	YLR119W::chr12_2:uptag	153.2	165.6	148	128.6	382	167.4	98	79.8
AGGGTCGAACAGTCATCAAC	Standard	YJL134W::chr10_1:uptag	1310	1121.4	1150.8	1523	3384.6	2030.8	763.2	745
AGGGTCTTAACAGTCGCTAA	Standard	YJL133W::chr10_1:uptag	3636.4	3226.4	3288.8	3374.8	5078.2	4382.2	2174.4	2006.6
AGGGTGAGAAATTGTACTCC	Standard	YCL054W::chr3_1:uptag	74.4	64	73.8	82.4	93.4	79.6	56.4	53.8
AGGGTGCCAACATCGCAGAA	Standard	YLR186W::chr12_3:uptag	269.8	305	217.6	213.25	684.2	259.2	159.2	102
AGGGTGGCAAATTCTCGACA	Standard	YLR187W::chr12_3:uptag	1263.4	928.6	1026.25	1433	2063.4	1338.2	713	702.2
AGGGTGTAACATTAACCGCA	Standard	YGR161C::chr7_5:uptag	294.2	232.2	300.5	353.25	638.6	529.6	180.6	154
AGGGTTATAGACAACTCCAC	Standard	YGR162W::chr00_17a:uptag	60.6	60	68.6	62.4	81.8	68.8	54.2	51.2
AGGGTTCCAAATTAGGAGAC	Standard	YDR500C::chr4_8:dntag	582.8	289	523.4	505.8	506.6	492.4	570.8	733
AGGTAAACACCAACTCCTGG	Standard	YGR163W::chr7_5:uptag	1669.6	1583.6	2848.6	3051.6	2476.75	848.4	474	527.8
AGGTAACATATCTACACCCG	Standard	YJL181W::chr10_1:dntag	2148.2	1981.2	2272.4	2528.6	3519.25	2558.6	2059.8	1944.4
AGGTAAGCAACGATACGTCC	Standard	YJL182C::chr10_1:dntag	1878.5	1542.4	1372.4	2100.25	3142.2	2323.8	1673	1658.4
AGGTAATAAGAAGGCGTCTC	Standard	YJL180C::chr10_1:dntag	61	61	63.4	69	76	67.6	49.6	48.8
AGGTAATCAACCCATATCCG	Standard	YDL192W::chr4_3:dntag	84.25	93.4	191	162.2	70.6	111.75	161	170.8
AGGTAATGAACGAGATCGCC	Standard	YJL179W::chr10_1:dntag	59	58.8	66.25	59.4	74.6	61.2	49.8	49.4
AGGTACAAAGACAGCCCGT	Standard	YGR164W::chr7_5:uptag	264.8	289.4	236.75	196.4	655.75	257.6	180	91.4
AGGTACAGAACCCACTACGG	Standard	YJL130C::chr10_1:dntag	670.2	466	499.2	455	845.2	987.6	439.6	391.6
AGGTACTAACAGTTCACACC	Standard	YJL129C::chr10_1:dntag	72.8	87	82.2	78.5	120.5	83.2	62.6	55.4
AGGTAGACAAGCAGACGTTC	Standard	YJL128C::chr00_15:uptag	226.5	241.6	250.25	243	616.2	286.4	150	132.4
AGGTAGAGAAGACACGTTCC	Standard	YJL077C::chr10_2:uptag	2188.5	1914	1901	2531.6	3294.2	2985.8	1119.2	1121
AGGTAGATAACGCTAGATCC	Standard	YJL076W::chr10_2:uptag	51	50.5	53.2	55.4	60.4	57.4	44.2	41.6
AGGTAGCAACCATGACTAGC	Standard	YJL075C::chr10_2:uptag	75.4	71	78	70.6	104.2	77	65	52.6
AGGTATCTAACATCAGCACC	Standard	YJL124C::chr10_2:dntag	265	294.2	200.8	222	755.2	452	235	175.8
AGGTATGAACCATCGCACAC	Standard	YJL123C::chr10_2:dntag	1122.6	838.8	906	1186	2817.8	2306.6	1294	1381.6
AGGTCAACCATAGCACACGG	Standard	YGR166W::chr7_5:uptag	257.2	322	230.8	205.25	727.8	272.4	186	96.8
AGGTCACAAGACGACAGCTC	Standard	YJL122W::chr10_2:dntag	280.4	318	233.2	202.2	683.4	269	181.6	103.2
AGGTCACTAACATCTATCCG	Standard	YJL120W::chr10_2:dntag	943.6	810	931.8	923.6	815.4	997.8	647.6	936.6
AGGTCATAACAGTTGAGACG	Standard	YJL071W::chr10_2:dntag	80.2	74	68.2	72.2	95.2	86.2	58	53.2
AGGTCATGCAAGTAACGATC	Standard	YJL070C::chr00_15:dntag	3114.4	2268.6	3214.67	3130	4671.4	3586.2	2798	2798.8
AGGTCCACAGAACTCAAGCT	Standard	YLR120C::chr12_2:uptag	270.4	309.2	242	212	569.75	242.8	178	93.6
AGGTCCAGAAATTGCTGCAC	Standard	YDR501W::chr4_8:dntag	870.2	685.6	740.75	884.6	2258	1572.2	954.8	1042.4
AGGTCCGCAAATTCTGAGAC	Standard	YCL055W::chr3_1:uptag	2129	1934.4	2508.2	2696.25	3882.8	2925	1080.6	969.8
AGGTCCGTAACAGTAGCACA	Standard	YJL069C::chr10_2:dntag	117.8	99.4	100.2	111.8	308.75	112.5	83	66.2
AGGTCGAGAGAACGTCACAT	Standard	YJL068C::chr10_2:dntag	3214	2883.2	2931.5	3301	5175.4	4191.6	2991.4	3185.6
AGGTCGCAACAGTGGTACAA	Standard	YIL012W::chr9_1:uptag	303.8	306.6	289.8	275.8	882.25	407	128.8	88.8
AGGTCGTTAAGAGGCAATAC	Standard	YIL013C::chr9_1:uptag	207.4	130	244.333	250.8	430.6	271.6	115.6	115.2
AGGTCTTCAACATGAGGACA	Standard	YNL077W::chr14_3:uptag	713	614.8	493.2	786	1215.2	812.5	407.2	410.6
AGGTCTTGACAATAAGGACG	Standard	YIL014W::chr9_1:uptag	345.6	354.5	406.2	453.75	941.4	545.5	272.6	353.8
AGGTGAAATTGGTAGAACCC	Standard	YGR167W::chr7_5:uptag	65.25	63.8	73.4	72	85.8	65	48.6	51.6
AGGTGAATAACGCATACGCC	Standard	YIL015C-A::chr9_1:uptag	3139.6	2640.8	2669.2	2961.8	5206.6	3620.4	1651.6	1652.6
AGGTGACCAAATCTTGTCCA	Standard	YLR188W::chr12_3:uptag	1309.2	1406.6	1570	1497	2693	1666.25	961.4	966.6
AGGTGATTACAACGAATGGC	Standard	YCL056C::chr3_1:uptag	87.8	84.5	87.8	96	132.4	87.6	61.4	59.2
AGGTGCGTACAAATGCTATG	Standard	YGR168C::chr7_5:uptag	1711.4	1480.6	1462.2	1419.4	3140.8	2261.8	909.4	900.4
AGGTGCTAACCAGCTCTAAC	Standard	YIL062C::chr9_1:uptag	67.6	76	104	79.6	104.6	71	59	53.6
AGGTGGCCCAAGGAACTTAC	Standard	YDR502C::chr00_17a:dntag	2605.8	2424.6	2131.6	2537.6	4214	3530.25	2372.6	2617.6
AGGTGGTTAAATTGGTCCCA	Standard	YGL256W::chr7_3:uptag	1514.75	1459.8	1680.8	1943.6	2450.2	2331.2	831.2	1024.4
AGGTGTACCCAACATGCAGA	Standard	YGR169C::chr7_5:uptag	893.2	772.75	749	973	2077	1238.4	485.8	547.4
AGGTGTATAGAAGCAATCCG	Standard	YGR170W::chr7_5:uptag	2363.4	1890.8	2157.2	2880.25	4205.2	3080.2	1366.6	1404.4
AGGTGTCGAAATGGCATACA	Standard	YNL076W::chr00_16b:uptag	120	125.8	130.75	108.8	235	128.6	104.2	89.2
AGGTGTTAAGCAGGAATCAC	Standard	YGR171C::chr7_5:uptag	64.8	74.4	64	62.25	90.6	65	56.8	49.6
AGGTTAAGATAATCACCGCC	Standard	YCL057W::chr3_1:uptag	1691.2	1714	1697.8	1852.6	2129.6	1685.8	771.4	664.4
AGGTTACGAACATGACAGCC	Standard	YIL063C::chr9_1:uptag	181.8	199.2	153.6	137.2	552.4	187.2	128	77.2
AGGTTATACGAACGACCACC	Standard	YGR172C::chr7_5:uptag	79.4	84	67.6	81.8	112.6	76.4	59.6	58
AGGTTCATACAACGTCAGAC	Standard	YIL064W::chr9_1:uptag	78.4	87.4	71.2	77.4	165	78	63.2	54
AGGTTCCCAACATCACGAGA	Standard	YNL075W::chr14_3:uptag	104	107.8	96.6	93	152.6	125	63.2	58.8
AGGTTCTCACAAATGTCAGG	Standard	YDL193W::chr4_3:dntag	72.2	74.4	67.2	69.4	102.4	74.2	52.4	54.6
AGGTTCTGAAGACAACTTGC	Standard	YDR427W::chr00_11:uptag	62.6	62	59.2	60.5	86.6	71	47	51.6
AGGTTGAGACACACACATCG	Standard	YIL065C::chr9_1:uptag	748.2	785	741.4	647.2	1551.2	525.8	447.2	324.2
AGGTTGTGAACAGTGTCATC	Standard	YJL074C::chr10_2:uptag	77.2	78.8	87	75.2	102.6	79.2	56	54.6
AGGTTTATAGAACGCGAGCA	Standard	YGR173W::chr7_5:uptag	597.2	569.8	568.25	585	1088.25	793	382	388.6
AGGTTTGAACGACAAGACGT	Standard	YGR174C::chr7_5:uptag	3086.8	3014.2	3017.6	3508.8	3316.6	2911.6	1749.4	1879.2
AGGTTTGGAACATCGAGACA	Standard	YNL074C::chr00_16b:uptag	2932.2	2792.2	2870.6	2975.4	4729.4	2851.8	1581.2	1983
AGTAAACTCAAGACCTCCTG	Standard	YGR175C::chr7_5:uptag	57.8	59.2	60.6	55.25	74.8	59.4	45.8	48.2
AGTAAATGTGCTCAACCCGA	Standard	YGR176W::chr7_5:uptag	777.8	814	832.2	1005	1663.2	1566.8	460.4	373.4
AGTAAATTGTAATCCCGCCC	Standard	YGR177C::chr7_5:uptag	2961.4	3021.4	3210.2	3361.6	4610.75	3682.4	2002.2	2016
AGTAACAGTCGTGAACATCG	Standard	YIL016W::chr9_1:dntag	2783.2	2414.2	2853.4	3085.8	4785	4219.4	2099.2	2845
AGTAACATCTCGACAACGCG	Standard	YIL017C::chr9_1:dntag	88	88.2	79.8	86.2	131.2	99.6	70.4	69.2
AGTAACGCACATACACCTGT	Standard	YIL018W::chr9_1:dntag	64.2	63	67.2	63	90.2	68.2	49.8	44.4
AGTAAGAGAACTGACCGTCC	Standard	YIL019W::chr9_1:dntag	54.25	50.8	55.2	54.4	74.2	63.8	52.4	49.4
AGTAAGGCAACCCACGCAGT	Standard	YGR178C::chr7_5:uptag	631.4	617.6	683.4	569.5	1315.2	887.4	411.8	294.8
AGTAAGGGAACATCGGTATC	Standard	YIL067C::chr9_1:dntag	993.2	926.6	975.667	755	1437.6	479	500	314
AGTAATCAACGCGAACTCCG	Standard	YIL068C::chr9_1:dntag	66.8	63.8	68.2	68	84.25	70.4	50.2	46.4
AGTAATGCAACCCGACCTAG	Standard	YIL069C::chr9_1:dntag	82.2	93	90.8	85.2	126.6	89	64	56.6
AGTAATTGAACAGGTCAGCC	Standard	YCL059C::chr3_1:uptag	77.6	85	81.4	80.8	97.5	89.2	57.6	51.6
AGTAATTTAACTAGGGCGCG	Standard	YIL070C::chr9_1:dntag	50.4	53.6	49.4	51.2	57.8	50.8	41.8	40.4
AGTACAGCAACGCAGAGCCT	Standard	YEL023C::chr5_2:dntag	263.6	312.4	243	208.2	619.4	264.6	187.8	97.4
AGTACATTAACCTACGCGAC	Standard	YEL024W::chr5_2:dntag	66.4	65.8	64.4	66.8	78.6667	64	54.8	48.6
AGTACCACAACTCAGACGTG	Standard	YEL071W::chr5_2:dntag	581.75	479.8	548.2	497	1084.33	782.8	348	270.6
AGTACCAGAACGCACGACGT	Standard	YEL072W::chr5_2:dntag	178.6	171.8	132.6	129.6	322.75	128.2	111.8	74.6
AGTACCTAACATCGTAGACC	Standard	YLL029W::chr12_1:uptag	113	113.8	163.6	144.8	299.5	184.2	82.8	69.8
AGTACCTCAACCCAGTTAGA	Standard	YLL030C::chr00_8:uptag	161	180.4	142	128.6	506.6	160.75	118.6	75.8
AGTACGAACCGCGACACAGT	Standard	YLL031C::chr12_1:uptag	168.6	184	129.75	133.8	559	165.8	114	71.2
AGTACGAGAACCGATGAGCC	Standard	YLL032C::chr12_1:uptag	3172	3195.2	3483.4	3080.2	3171.4	3547.4	1279.8	1294.2
AGTACGGAACATGACGACCG	Standard	YLR014C::chr12_1:uptag	2208.6	1994.4	2357.2	2549.6	3147	2649	1457.8	1535.6
AGTACGTCACAGAACTGAGC	Standard	YLR015W::chr12_1:uptag	260	269.2	214.8	194.4	614	239.4	177.2	89.2
AGTACGTTAAGATAGACCCG	Standard	YLR016C::chr12_1:uptag	3607.2	3618.8	3329.2	3805	3684.75	3647.6	2123.6	1932.6
AGTAGAAACATCGAGTCGC	Standard	YLR017W::chr12_1:uptag	120.2	102.4	116.6	112	162	129.4	100.6	94.6
AGTAGACTAACCGATATGCC	Standard	YLL037W::chr12_1:dntag	63.8	66.2	64.8	65	82.8	69	47	46.2
AGTAGCCGAACCGAACGGAT	Standard	YLL038C::chr12_1:dntag	1190.2	1015.2	1687	1435.4	1721.6	1744.5	1410.2	1431.2
AGTAGCGTAACCAGTCGAGA	Standard	YLL039C::chr12_1:dntag	151	198.6	120.4	126.4	586	420.2	119.8	109.8
AGTAGCGTAACCAGTCGATA	Standard	YIL083C::chr9_1:dntag	78.6	120	73.2	68.6	298.2	256	71	73.6
AGTAGGAGAACGAATTGTCC	Standard	YLL040C::chr12_1:dntag	1816.4	2123.8	2058.8	2617.2	3202	2691.2	1695	1613
AGTAGGCCAACCCAGCGATA	Standard	YNL073W::chr00_16b:uptag	290	322.8	237	215.4	701.4	273	193	102
AGTAGGTAACCCACTCACAG	Standard	YLR022C::chr12_1:dntag	190.2	203.2	165	162.8	668.2	208.2	139.2	75
AGTAGTAACCATTAAGCCGC	Standard	YLR023C::chr12_1:dntag	363.4	291.6	335.25	252.25	790.2	332.5	155	216
AGTAGTAGAACCTAGTAGCC	Standard	YLR024C::chr12_1:dntag	1096.4	1015	1144.6	1002.8	2122.4	1778.75	1239.6	1323.6
AGTAGTCCAAATTCGGGTAC	Standard	YLR025W::chr12_1:dntag	64.4	67.4	68.6	62.2	88.2	68.2	54.6	48.8
AGTATAGAAGGCAAGCCCGC	Standard	YCL060C::chr3_1:uptag	95.6	109.25	83.4	91.5	192.2	102.6	67.8	55
AGTATAGCAACCTCAACTCG	Standard	YOR332W::chr15_4:uptag	86.4	83	94	110	129.75	106.8	75.2	64.6
AGTATATTAACCGCCCACAG	Standard	YOR333C::chr15_4:uptag	399.8	398	377.6	340.4	908.6	361.6	267.4	164.4
AGTATCGAACATGAGGTACG	Standard	YOR334W::chr15_4:uptag	3306.2	2189.2	3315	3493.6	3325	3304.4	1705	1605
AGTATCTAACCATCCTGACG	Standard	YOR335C::chr15_4:uptag	59.6	54	61.6	58.8	68	52.4	41.2	40.2
AGTATCTGAACATCGTCACC	Standard	YOR383C::chr15_4:uptag	1538.6	1549.8	1294	1626.8	3703.33	2371	1405	1314.4
AGTATGGTAACCGAGCGACA	Standard	YOR289W::chr15_4:dntag	2925.8	2335.6	2728.4	2248.8	2881.75	2737.5	2321	2189.4
AGTATTAACGACAGACCCTC	Standard	YGR179C::chr7_5:uptag	214.25	237.8	175.4	172	588.6	193.25	138.4	83.6
AGTATTATAGAACTCGCGGC	Standard	YGR180C::chr7_5:uptag	68	66.8	71.6	68.2	87.5	76.8	59.4	56.2
AGTATTCCAAATTGCCCTCG	Standard	YGL129C::chr7_2:uptag	75	90.8	73.2	77.6	152	87.6	61.2	48
AGTCAAGGAAGAAGCTGTCC	Standard	YCL061C::chr3_1:uptag	509.6	368.8	579.2	652	527.25	498.6	345.6	225.6
AGTCACACAATACACTCTGG	Standard	YOR290C::chr15_4:dntag	58.2	70.4	59.6	60.4	87.25	56.4	49.2	46.2
AGTCACAGAAGCACACGTCG	Standard	YOR291W::chr15_4:dntag	394.2	456	338	343.6	1313.8	594.2	353.2	276.2
AGTCACCCAACCGAAGGAGT	Standard	YLR121C::chr12_2:uptag	2384.2	2208.5	2337	1842	3763.8	2828.4	944.8	911
AGTCACGAACCCTACGGAAG	Standard	YOR339C::chr15_4:dntag	1979.4	2471.6	2049.4	2072.4	3259.75	3727.4	2218.8	1776.8
AGTCAGGACGAATTGTTCA	Standard	YFL042C::chr00_15:dntag	1810.6	1469.8	1769.4	1945.2	2956	3017.4	1925	2106.8
AGTCAGTCAACATGCTAGAC	Standard	YOR340C::chr15_4:dntag	75.6	88.2	77.8	84	184.6	88.4	67.4	64.8
AGTCAGTTAAGATCAACGCC	Standard	YOR341W::chr15_4:dntag	71.4	62.2	76	73.8	99	73.6	63.4	56.6
AGTCATAGAACGCTAGGACC	Standard	YOR342C::chr15_4:dntag	1487.8	983.4	979.2	1185	1978.2	1481.2	1293.8	1472.8
AGTCCATGACAACGTACACT	Standard	YDL227C::ctrl_32:uptag	3774.2	3558.4	3568	4226.6	4171.75	3863.6	2014.2	1888.6
AGTCCCTGAACATCCTTAGA	Standard	YNL072W::chr00_16b:uptag	1724	1544.2	2037.2	2086	3042.25	1554.8	1096.6	972.4
AGTCCGAACCATACTACAGG	Standard	YGR181W::chr7_5:uptag	74	80.2	74.75	79.2	89.2	82.2	57.8	51.8
AGTCCGTGAAATTGTTCCAC	Standard	YCL062W::chr3_1:uptag	1150.8	1460.2	2030	2185.4	2246	1477.8	1213.2	1179.6
AGTCCTAACCCAGCTTAATG	Standard	YGR182C::chr7_5:uptag	431.2	426	395	343.25	865.4	331.8	234.8	210.4
AGTCCTATACAAGAGGCACC	Standard	YGR183C::chr7_5:uptag	482.2	418.4	1717.6	1119.2	200.5	628.2	227.8	175.6
AGTCCTCTAAATGTGGTACG	Standard	YOL040C::chr15_5:uptag	65.4	64.6	74.5	70	88	86.6	69	62.2
AGTCCTGAAGAACTACAGTC	Standard	YGR184C::chr7_5:uptag	314.2	312.2	300.8	265	449.4	301.4	167.2	158.2
AGTCCTTCAAATGGAGAGAC	Standard	YCL063W::chr3_1:uptag	145.8	98	209.2	207	240.8	147	75.4	74.2
AGTCGATAAGAATACTGCGG	Standard	YOL041C::chr15_5:uptag	1138.2	967.2	1339	1008.4	1004.4	882.4	575.8	609
AGTCGCACAACATTACTACG	Standard	YOL042W::chr15_5:uptag	65.75	70.6	70.8	66.8	86.8	74.8	54.2	46.6
AGTCGCATAAATTGATCGCC	Standard	YCL064C::chr3_1:uptag	61.8	61.8	59.75	66.4	88.8	74.6	50.2	52.4
AGTCGCCTAACATGCAGTAA	Standard	YOL043C::chr15_5:uptag	3498.6	3364.4	3594.75	3224	4560	4067.8	1753.4	1617.8
AGTCGCGCACAGCAACGTAT	Standard	YOR386W::chr15_5:dntag	322	337.8	263.6	262.8	1071	371	235	200.6
AGTCGCGGAATTGGTTACA	Standard	YNL071W::chr00_16b:uptag	82.6	85.8	73.6	82	192.25	119.4	85	75
AGTCGCTAACCATAAGACCT	Standard	YDL227C::ctrl_33:uptag	4334	4047.8	4260.2	4608.6	5749.6	4790.4	2094.4	2069.4
AGTCGCTTAACATCGGTTCA	Standard	YGR185C::chr7_5:uptag	100.8	96.4	108.75	96	183	101.2	83.6	78.2
AGTCGGGACCATATACAGCC	Standard	YGR186W::chr7_5:uptag	182.2	202.4	166.25	140.2	527	157.6	120.8	76
AGTCGGTTAAGAGCGCATAA	Standard	YOL040C::chr15_5:dntag	89.6	88.6	109.75	96.2	147	99.2	76.6	76.8
AGTCGTACAGAACTCGATAC	Standard	YOL041C::chr15_5:dntag	470.2	442.2	629.6	588.8	667.6	653.4	656	687.8
AGTCGTCAACAGGTGAGAAT	Standard	YGR187C::chr7_5:uptag	75.6	80.6	78	77	92.75	80.6	57.8	53.4
AGTCGTCGAAATTAGTAGCC	Standard	YOL042W::chr15_5:dntag	3455	3234.2	3371.2	3641.8	5918.6	4784.4	3935.2	4194.4
AGTCGTGAAGAACTCATACG	Standard	YOL043C::chr15_5:dntag	873	818.2	805.25	872.4	1998.2	1681.2	1107.6	1181
AGTCGTGTAACCATGTGACA	Standard	YOR003W::chr15_1:uptag	2983.2	2717.4	2872.6	2977.2	4527.6	3605.4	1693.6	1755.6
AGTCGTTTAACTGAACCGAG	Standard	YOR004W::chr15_1:uptag	64.2	54.8	62.25	65.25	84	72.75	54.6	47.8
AGTCTACAACATTAGCACGC	Standard	YOR005C::chr15_1:uptag	3364.2	2534.8	2877.6	2299.75	4115.75	3911	1849.8	1408.4
AGTCTAGCAGAACGACAGCT	Standard	YOR006C::chr15_1:uptag	250.2	259.8	191	167	606.8	204.2	164.4	91.4
AGTCTCAACCCATCAGAAGG	Standard	YGR188C::chr00_10:uptag	177.2	201.6	200	161.8	727	175.4	130	77.4
AGTCTCTAACCAGATATGCG	Standard	YGR189C::chr7_5:uptag	1863.2	1369.6	2053.2	1405.6	2122	1996.4	752.6	787.2
AGTCTCTGACAACATTGAGC	Standard	YOR056C::chr15_1:uptag	63	60	67.2	68.8	79.2	70.4	55	51.2
AGTCTGACAGCAACTAATCC	Standard	YGR190C::chr7_5:uptag	122.2	126	112.4	98.2	286.4	92.6	77.8	67.2
AGTCTGAGAGAAGAGATCCT	Standard	YGR191W::chr7_5:uptag	61.4	58.4	64.75	68.5	75.25	70.5	51.2	50.2
AGTCTGTTAAGATATGCGCC	Standard	YOR058C::chr15_1:uptag	2310.2	2005.6	1811	1821.2	2918.2	2518	1231	1293.4
AGTCTTAACCGACGCACAAG	Standard	YGR192C::chr7_5:uptag	307	290.25	313.667	281.6	492.8	325.4	194.2	172.6
AGTCTTATACAGCGAACTCG	Standard	YOR011W::chr15_1:dntag	918.4	811	801.8	733.6	1162.8	1234.2	530.8	541.8
AGTCTTCAAATTCTCTGCG	Standard	YDL194W::chr00_16b:dntag	60.8	60.75	62	61.75	74.6	64	48.2	46.6
AGTCTTCGAGAACAAACCCG	Standard	YOR012W::chr15_1:dntag	839	782	679	741.25	2295.8	1578	1057	1256.2
AGTCTTGGAACAGTGAGTAC	Standard	YOR013W::chr15_1:dntag	1436	1585.4	1138.4	1266	2741.75	2444.4	1377.2	1216
AGTGAAGAAGAATGCGTCCT	Standard	YLR122C::chr12_2:uptag	3039.8	2454.4	2833	2687.8	4402.5	3251.6	1522.2	1484
AGTGAAGGAACCTGAATTGC	Standard	YDR503C::chr4_8:dntag	2341.6	2062.4	2723.25	2496	4264.2	2880.4	2356.8	2388.2
AGTGACAACCCGACTGAACG	Standard	YOR014W::chr15_1:dntag	368.2	288.4	517.8	408.8	102	98.8	167	217
AGTGACACAAGCGCAGACCT	Standard	YOR062C::chr15_1:dntag	422.6	401.6	347.6	313.4	1132	556.4	326	215.8
AGTGACCCAACATTATAGCG	Standard	YOR063W::chr15_1:dntag	63	67.6	66.4	65.75	85.8	70	54.4	48.6
AGTGACGAACATCTAGTACG	Standard	YOR064C::chr15_1:dntag	914.6	826.4	962	1162.2	2312.8	2045.2	1387.4	1433.8
AGTGACTTAACATTGGACCC	Standard	YDL227C::ctrl_22:dntag	5173.6	5061.8	5015.8	5468.4	6409.8	5412.8	4339.4	4207.8
AGTGAGAACCCATCATACCG	Standard	YOR065W::chr15_1:dntag	313.6	305.4	1072.6	875.667	678.8	820.8	471.8	396.4
AGTGAGATAACCTTACCCAC	Standard	YHR062C::chr8_2:uptag	57.8	60	60	58.6	88.6	58.2	51	45.8
AGTGAGCAACCCGCCAGAAT	Standard	YGR193C::chr7_5:uptag	243.2	273.2	219.8	187.4	608.6	228.4	169.4	99.4
AGTGAGGTACAACGACGCAC	Standard	YDL227C::ctrl_37:dntag	5977.4	5962.2	5803.5	6312	5686.8	5991	4777.2	4470.8
AGTGAGTGAACCGACGCTAA	Standard	YHR064C::chr00_8:uptag	64.8	64.4	66.8	69.8	91.2	77.2	59.4	53
AGTGATCGAACAGTTGCGAA	Standard	YGR194C::chr7_5:uptag	2839	2809.2	3008.8	2936.2	4322	3473.6	1370.8	1440.8
AGTGCAACCAGTGTGAACCA	Standard	YGR195W::chr7_5:uptag	79.8	84.4	72.2	78.5	92.2	83	56.4	49.2
AGTGCAAGAACGGTAGCCAC	Standard	YHR065C::chr8_2:uptag	138.2	144.4	120.4	110.4	398.6	119.8	109	72.2
AGTGCAGTAACAGTGCGTAA	Standard	YHR113W::chr8_2:uptag	1671.2	1440.8	1933.2	2190.4	1908.2	2251.6	891.2	703.4
AGTGCATAAGAATATCCCGG	Standard	YDL195W::chr4_3:dntag	49.4	46.4	51.4	54	61.2	52	42.4	41.2
AGTGCATCACAAGAGACTCG	Standard	YGR196C::chr7_5:uptag	216.6	192.8	199.8	241	508.2	326.6	154.6	129
AGTGCATGAACAGGTGATAC	Standard	YHR114W::chr8_2:uptag	125.2	119.8	119.25	124.8	242.75	169.6	88.4	85
AGTGCCAGACACACAGAGCT	Standard	YHR115C::chr8_2:uptag	269.2	304	234.75	230	584.2	248	182.4	126.8
AGTGCCATACAAGCGCATAG	Standard	YGR197C::chr7_5:uptag	135	149.8	121.4	112.6	367.8	142.4	90.2	70.4
AGTGCGAGAACATCGTGTAA	Standard	YHR116W::chr8_2:uptag	764.6	811.2	1251.25	1318.8	870.4	1708.6	448.4	578.2
AGTGCGATACAATACGAGCG	Standard	YHR068W::chr8_2:dntag	82.2	80.6	88.3333	84.8	105.2	89	64.6	62.8
AGTGCGCCACAGAAGAGACT	Standard	YHR069C::chr8_2:dntag	236.8	260	205.333	174	488.4	226	160.6	84.6
AGTGCGCGAAATGTTCTACA	Standard	YHR070W::chr8_2:dntag	55.8	55.6	57	57.8	77	62	49.8	47.8
AGTGCGTTACAAGAAGCAGT	Standard	YGR198W::chr7_5:uptag	96.8	112	94.5	100.2	159	115.6	71.6	66.8
AGTGCTAGAAATACTCAGCC	Standard	YHR120W::chr8_2:dntag	115.2	141.2	98.25	102.4	416.2	126	90.2	61
AGTGCTCAACGACAACTACT	Standard	YGR199W::chr7_5:uptag	1582.2	1590.5	1647.8	1759.4	2478	2012.4	907.8	866
AGTGCTGGAACATTATTCGC	Standard	YDL227C::ctrl_23:dntag	5051.8	4614.8	4631.2	5217.8	5592.4	5120	3648.4	3515.8
AGTGGAACCGAAGATACCGT	Standard	YHR121W::chr8_2:dntag	2518.4	2709.8	2788.4	3234.6	4610	4891.6	2502.4	2601.4
AGTGGAGGAACCGTCAATAC	Standard	YHR122W::chr8_2:dntag	69.4	67.2	68.4	68.6	94	75.8	60.2	56.4
AGTGGATAACATTGATCGCG	Standard	YGR200C::chr7_5:uptag	284.6	232.2	307	261.4	336.8	177.6	140	199.6
AGTGGCCTACAAATTGCATG	Standard	YGL130W::chr7_2:uptag	50.25	63.2	48	50.2	55.8	49.6	43	39
AGTGGCTAACCATTCCAGAA	Standard	YGR201C::chr00_10:uptag	1376.4	1132.4	1375.8	1428	2152.8	1293.4	474	566.8
AGTGGGAGAACCGCACCATA	Standard	YNL070W::chr00_16b:uptag	1689.8	1720.6	1820.8	1866.2	2267.4	2302.2	805.2	791.2
AGTGGGCGAACATTGATACA	Standard	YNL069C::chr14_3:uptag	963.4	753	1139.6	1365.4	1133.5	1270.6	578.8	635.4
AGTGGTACAGAAGACCGACT	Standard	YHR123W::chr8_2:dntag	79.8	81.6	68.8	79.6	112.8	78	56.6	54.8
AGTGGTATAACAGCCAGCAC	Standard	YBR296C::chr00_1:uptag	255.6	313.2	229	196.6	592.6	254	175.6	89.6
AGTGGTCAACAGTTCGAGAC	Standard	YBR297W::chr00_1:uptag	1836	1765.33	2342.4	2056	2308.6	2687.6	750.8	849.4
AGTGGTGCAGAACAAAGCCC	Standard	YGR202C::chr7_5:uptag	3032.4	2694	3117	3426.8	3628.2	3058.6	1356.2	1143.4
AGTGGTGTACCCGAAGACAA	Standard	YBR298C::chr00_1:uptag	2588.8	1881.4	2261.75	2055.8	3037.6	2599.6	876.8	954.8
AGTGTCCAACCAGACCAGAG	Standard	YBR300C::chr00_1:uptag	259	301.25	228.4	212.5	608.6	242.25	176.4	97
AGTGTCGTACAACCGATTAC	Standard	YCR076C::chr00_1:uptag	2460.2	2264	2536.5	2465	4317	2877.2	1399.6	1404.2
AGTGTCTCACAACGAGCGAC	Standard	YCR077C::chr00_1:uptag	143.2	260.8	162	146	314.75	219	98	91.8
AGTGTCTTAACCTAGTGACC	Standard	YCR079W::chr00_1:uptag	3052	2578.25	2911.4	3186.4	4623.4	3990.8	1472.6	1521.2
AGTGTGAACGAAGCAGACTT	Standard	YGR203W::chr7_5:uptag	3679.2	3524.4	3516.4	3689.2	5114.25	3791.6	1676.2	1661.4
AGTGTGACAGAAGACTACCT	Standard	YCR081W::chr00_1:uptag	127.4	85.8	163.8	187.6	550.2	119.8	86.6	75.2
AGTGTGAGAAATGTTGACCC	Standard	YCL069W::chr3_1:uptag	3333.4	3146.2	3229.5	3752.2	4252.4	3999.2	1730.4	1873.4
AGTGTGCTAACATGGTCGAA	Standard	YCR024C::chr00_1:dntag	70.2	84	74	74.2	97.5	83.4	55.8	54.6
AGTGTGGAACCCAGCGTAAC	Standard	YCR024C-A::chr00_1:dntag	216	252.8	182.5	202.4	614.2	252.8	167.4	98.6
AGTGTGGGAACCGACATACA	Standard	YCR025C::chr00_1:dntag	2190	1937.8	2240.4	2173.4	3989	2366.8	2198.4	2489
AGTGTGTAACAGTGTCTACG	Standard	YCR026C::chr00_1:dntag	1241	1182	1232.8	1551.4	2540.6	2130	1267.8	1197.6
AGTGTTAAGCCAGAAGACCT	Standard	YLR123C::chr12_2:uptag	497	445.4	503.8	498.8	1347	574.4	404	324
AGTGTTAGAACCACGATACC	Standard	YPL184C::chr16_2:uptag	943.2	897.6	1068.5	826.2	1460.6	996.8	557.2	492.6
AGTGTTCAACCGAGCCGAAG	Standard	YDL227C::ctrl_54:dntag	1983	2019.5	1920.2	2213.6	1808.4	1577.4	1257.2	1057.8
AGTTAAGCGCAACGACATCC	Standard	YGR204W::chr00_10:uptag	55	63.4	56.2	60.6	83.2	66.8	51	47.6
AGTTACCAACCGTACCTAAG	Standard	YPL181W::chr16_2:uptag	3799.4	3151.2	3916.4	3988.6	5186.4	4142.6	2170.8	2128.6
AGTTACGAACCGGAAGGACC	Standard	YGR205W::chr7_5:uptag	3284.6	3147.8	3340.75	3978.8	4136.2	3029.2	1751.8	1752
AGTTACGGAACCGCACGACA	Standard	YPL182C::chr16_2:uptag	98.2	90.2	98.6	93	150.8	103.5	73.2	68.6
AGTTACTCACCATGCTTCG	Standard	YGR206W::chr7_5:uptag	530.8	343.8	490	474.2	1022.2	888.2	329.2	293.8
AGTTACTTAATACACCGCCG	Standard	YGR207C::chr7_5:uptag	999.8	882	1159.5	941.8	1072.6	1107.25	420.4	327
AGTTAGACAAGCGACACTCC	Standard	YPL124W::chr16_2:uptag	77.4	78	68.4	67.6	123.6	70.8	56.4	48.2
AGTTAGTAAGCAAGAGCGTC	Standard	YPL123C::chr16_2:uptag	511.25	430.8	477.2	457.5	919.8	858.5	247.8	192.8
AGTTAGTCACAACGGAATCG	Standard	YGR208W::chr7_5:uptag	3346.4	2964.8	2981.6	3051	3294.4	3563.6	1785.2	1857.4
AGTTATAGAATACAGCCGCC	Standard	YPL122C::chr16_2:uptag	222.2	254.6	185.25	179.8	585.4	213.8	158.6	85
AGTTATCTAAGAACGGTGCC	Standard	YPL121C::chr16_2:uptag	668	721.4	632.2	716.4	702.667	864.4	328.4	270
AGTTCAATAACGCTACAGCC	Standard	YPL161C::chr16_2:dntag	205.8	209.4	182.2	166.2	495.4	207	147.8	91.6
AGTTCACTAACCGGAATCAC	Standard	YPL160W::chr16_2:dntag	64.2	63.8	72.2	70	90.4	74.6	48.2	48.8
AGTTCATCAACCATTCGAGC	Standard	YER027C::chr00_11:uptag	2399.6	1820.25	2737.6	2209.75	2650.4	1967.6	1477	1483.6
AGTTCATGCAATAAGAGCGC	Standard	YCL074W::chr00_12:uptag	1224.8	1123.75	1663.2	1758	2163.6	1745.75	614	671.2
AGTTCCAGAAGACGAGACGC	Standard	YGR209C::chr7_5:uptag	1026.2	770.8	1414	1285	2122.6	1119	542	543.4
AGTTCCCAACCCGTATTAAG	Standard	YGR210C::chr00_8:uptag	3203.8	2627	2827.4	3677.2	4215	3382.8	1716.6	1953.6
AGTTCCCGAAAGAGCCCAGA	Standard	YGR211W::chr7_5:uptag	245.2	290.2	220.6	180	679	215.75	176	89.8
AGTTCCGAAGCAACGTGAAG	Standard	YPL159C::chr16_2:dntag	1254.6	1010.75	1213.8	1039.6	2486.8	1949.8	1792.4	1690.4
AGTTCCGGCAATAACAAGTG	Standard	YDL196W::chr4_3:dntag	49.4	49	50.2	50.8	63.8	51.25	44.2	43.6
AGTTCGAGAGAAGACGATCT	Standard	YPL104W::chr16_2:dntag	168	131.4	139.8	165.6	174.2	140.8	121.8	145.4
AGTTCGATAAATTGTGGCCC	Standard	YDR504C::chr4_8:dntag	1408.6	1423.2	1305.8	1513.2	2981.2	2410.6	1613.8	1735.2
AGTTCGGCAACCCTCAGAGA	Standard	YNL068C::chr00_16b:uptag	247.4	250	268.4	247.4	676.8	230.8	157.2	122.6
AGTTCGGGAAATGTTGCATC	Standard	YDR505C::chr4_8:dntag	69	59	62.2	69.2	137	118.5	61.8	66
AGTTCGGTAACATGGTGACA	Standard	YPL103C::chr16_2:dntag	583.6	588.8	649.8	832.4	1096	1129.8	595	651.4
AGTTCGTCAACATCGCCAGA	Standard	YGR212W::chr7_5:uptag	428.8	382	429.5	339.5	965.2	589.75	259.2	199.2
AGTTCTAACCGAAGTTCACC	Standard	YGR213C::chr7_5:uptag	2104.8	1979.4	2573	2413.8	2999	1971.4	1293.8	1196
AGTTCTACAAATACGGAGCC	Standard	YPL101W::chr16_2:dntag	115.4	127.8	146.4	142.8	197.25	155.2	152	159
AGTTCTGACTCCTCATGCA	Standard	YBR146W::chr2_3:uptag	123.8	126.6	136	173.6	157	102.6	80.6	79.2
AGTTCTGTAACCCATCCAGG	Standard	YDL197C::chr4_3:dntag	1443	1190.4	1493.6	1305.4	1557	1580	908.2	1079.6
AGTTGAATGCAGATAGCTC	Standard	YFR005C::chr6_1:dntag	52.2	56	52	52	67	58.8	43.8	41.4
AGTTGCACATCCAAGCACAT	Standard	YGR214W::chr7_5:uptag	189.8	239.6	182.8	160	584	207.6	148.8	87
AGTTGCATAACCCGCACTAA	Standard	YNL067W::chr00_16b:uptag	392.2	449.8	688.6	688.2	433	471.8	381.6	344
AGTTGGAACCCGATGCAAGA	Standard	YLR189C::chr12_3:uptag	3745.4	3175	3700.8	3473.2	3778.5	3162.4	1673.6	1738.8
AGTTGGCCCACGAACCGTAA	Standard	YNL066W::chr00_16b:uptag	350.2	260	452.4	464.6	1175.75	770	189.8	226.6
AGTTGGCTAACACACCACAG	Standard	YPL102C::chr16_2:dntag	401	357.4	296.6	287.2	788.2	370	282.4	171.4
AGTTGTCAAGCAATACACCC	Standard	YCL075W::chr00_12:uptag	2651.4	2086.4	2470.8	2761.6	3851.4	2953.6	1240.6	1225.6
AGTTGTCCAAGAAACCAGCT	Standard	YDR161W::chr4_5:dntag	721.4	525.2	888.8	785	829.8	639.8	501.4	350.4
AGTTGTGTAACCCGGTAGAA	Standard	YNL196C::chr14_2:uptag	2334	2000.8	2059.5	2211	3511.8	2607.2	900.6	1048
AGTTGTTGAACCTACGGGAA	Standard	YNL065W::chr00_16b:uptag	1043.4	998.2	964	1107.4	1074.2	1252.8	467.4	504.6
AGTTGTTTAAGATAGCCGCC	Standard	YCL076W::chr00_12:uptag	1311.8	1434.6	1260.5	1333.6	2223.75	1451.2	567.6	523.8
AGTTTATTAACGCACCAGCC	Standard	YCR001W::chr3_1:uptag	268.8	290.4	239.8	226.6	700.6	254.6	177.6	102.4
AGTTTCACACAATGACACGG	Standard	YGR216C::chr7_5:uptag	111.8	162.6	102.2	85.4	234.5	91.6	65.8	50.6
AGTTTCCAAGAAGAGACGGT	Standard	YGR217W::chr7_5:uptag	116.4	117	126.6	103.6	182.25	128	83	71.4
AGTTTCCCAAATTGTCGAGC	Standard	YDR506C::chr4_8:dntag	2611	2113.4	2707.2	2440.4	3710.2	2893.75	1966	2478.4
AGTTTCCGAACGAAGACTAC	Standard	YNL195C::chr14_2:uptag	1330.6	1281	1243.2	1272.5	2722	1919.4	1003	1056.6
AGTTTGAGAACCCTATGACC	Standard	YGR218W::chr7_5:uptag	64.4	58	59.6	61.6	72.2	67.6	50	48.2
AGTTTGATAACAACACCCGC	Standard	YGR123C::chr7_5:dntag	2875.2	2551.4	2982	3288.2	5017.25	4713	2376.8	2738.2
ATAAACAGCGATTACCCGGC	Standard	YGR124W::chr7_5:dntag	833.2	791.6	1051.6	747.6	1695	1196.8	493.2	506
ATAAACCCACAGACCGTGTT	Standard	YLR124W::chr12_2:uptag	294.8	313.75	257.2	233.6	652.4	296.4	208.2	112
ATAAACCGAACGTACCTCGT	Standard	YGR125W::chr7_5:dntag	1298.2	1179.6	1900	1600.8	1356.2	971.4	1086	1075
ATAAACCTAATACCGTCGCG	Standard	YNL194C::chr14_2:uptag	2943.2	2066	2795.2	2905.2	2642.8	2171.8	1727.2	1654.8
ATAAACGAACATTGGGTCCC	Standard	YGR126W::chr7_5:dntag	1592.2	1665.4	1610.4	1670.6	2776.6	2353.2	1594.8	1714
ATAAAGAACCGCATCCCGTG	Standard	YGR127W::chr7_5:dntag	1733.5	1711	2067.4	2224.4	2011	1597.2	1450.2	1470.4
ATAAAGGTCATGCCAACCGC	Standard	YGR128C::chr7_5:dntag	155.4	170.8	140.4	124	516	163.5	114.6	75.2
ATAAAGTAGATACCCGTCGC	Standard	YNL193W::chr14_2:uptag	4316.8	3246.4	3308	3213.2	4164.75	3755	2555.6	2485.6
ATAAAGTGTTGACAAGCCCG	Standard	YDL198C::chr4_3:dntag	107	98.6	88	83.6	314.2	100	73	55.6
ATAAATCGAGTGAACCTCCG	Standard	YGR129W::chr7_5:dntag	2443.2	2296	2393.4	2897.6	4026.25	2725.6	2318.6	2265.6
ATAAATGCTTGGAACCCTCG	Standard	YGR130C::chr7_5:dntag	620.2	457.6	590	502.6	1654	875.4	476	599.8
ATAAATGGTATGAACGCCGC	Standard	YGR131W::chr7_5:dntag	1875.2	2046.8	1941.4	2413.75	2592.5	2011	1699.2	1655.6
ATAAATGTCATGCACCACCG	Standard	YGR132C::chr7_5:dntag	1165.8	1366.6	1776.8	1748.8	1198.5	1274.5	1180.6	1325.6
ATAAATTAGAAGCCGCCTGC	Standard	YGR133W::chr7_5:dntag	102.2	113.6	98.4	84.6	344.2	95.75	80	60.6
ATAACAAATCAGTTGCGCCG	Standard	YGR134W::chr00_8:dntag	783.4	614.2	814.6	819	694	882.6	500.6	403.4
ATAACATCTTCCAACCGGAG	Standard	YGR135W::chr7_5:dntag	242.4	236.8	521	718.8	137.4	226.4	336.4	331.2
ATAACATGATATACCGCCGC	Standard	YGR136W::chr7_5:dntag	1735.4	1611.2	1940.6	1696	2309.5	1778.4	976.6	1031
ATAACCACATCACAGGCTGG	Standard	YDL199C::chr4_3:dntag	373.4	347.2	309.4	275.6	694.8	397.8	249.4	159.4
ATAACCCAGTGACAACGCTG	Standard	YGR137W::chr7_5:dntag	1478	1192	1637.2	1526.25	1613.2	1218.8	953.2	957
ATAACCCGATTACAACTGCG	Standard	YNL232W::chr14_2:dntag	63.8	57.2	66	58.2	82.25	63.4	52.6	47.6
ATAACCCTCAGTAACGACGG	Standard	YNL231C::chr14_2:dntag	1711	1353.4	1863.8	1664	2763.2	1169.2	1580.6	1882.8
ATAACCGGATATAACTCGGC	Standard	YNL230C::chr14_2:dntag	454.4	432.2	308.2	416.8	819.4	472	425.8	438.4
ATAACCGTACTACAACCTGG	Standard	YNL229C::chr14_2:dntag	228.6	287.6	241.4	369.6	253.25	146	215.2	232.2
ATAACCTGATCGAACCCAGT	Standard	YLR125W::chr12_2:uptag	88.8	89	77.4	84.25	171.4	105.6	60.8	52.4
ATAACCTTAGATACACGCCG	Standard	YGR138C::chr7_5:dntag	1120.2	1103.2	1341.2	1166	1728.5	1223.6	611.2	602.8
ATAACGAAGAGCACCTCCGG	Standard	YNL173C::chr14_2:dntag	1758.6	1624.75	1989.4	1959	2087.4	1643.4	1448.6	1745.8
ATAACGACACAGACCTCTTG	Standard	YNL172W::chr14_2:dntag	260.8	302.4	232.2	201.2	651.2	249.4	187.2	92.4
ATAACGCACCCACAAGGTTG	Standard	YGR139W::chr7_5:dntag	984	1106.6	1301.2	1083.8	2188.6	1280.4	769.2	668.8
ATAACGCCACACACGAGTTG	Standard	YNL170W::chr14_2:dntag	260	317.8	264.75	233.6	627.6	283	187.8	106
ATAACGGAATAGACCGGGCT	Standard	YGR140W::chr7_5:dntag	59.4	57.8	56.8	54.8	75.2	62.6	45.6	42.6
ATAACGGGACAGAAGCTGCT	Standard	YGR141W::chr7_5:dntag	911	649.2	1101	942.5	1119.2	543.8	648	668.8
ATAACGTCAAGAGACTGGCC	Standard	YNL171C::chr14_2:dntag	151.8	156.4	227	175.4	144	95.4	115.2	135.2
ATAACTACAATACGCTGCCG	Standard	YGR142W::chr7_5:dntag	769.8	684.4	879	1060.2	1316.75	1653.4	888.6	845.6
ATAACTATAACCCGTACCGG	Standard	YJR005W::chr00_13:uptag	2167	1726.2	1883.8	2056	2091.4	2585	1074.6	1228
ATAACTTAACTACAGGGCCG	Standard	YJR006W::chr00_13:uptag	81	85.4	70.6	78.6	92	75.2	61.8	56.8
ATAACTTCAACCCGCGATAG	Standard	YJR007W::chr00_13:uptag	52	55.5	56	53	64.6	55.8	45	43.6
ATAAGATCAAGACCTGTGCC	Standard	YCR002C::chr3_1:uptag	56.4	60.2	58	56.8	72	58.8	53	47.6
ATAAGCACAAGCAGCGCGGT	Standard	YGR143W::chr7_5:dntag	455.6	462.6	499.6	430.2	1164.75	619.8	394.8	347.6
ATAAGCATAACCGATCCTCG	Standard	YJR008W::chr00_13:uptag	971.6	1277	1172.2	1345.4	1721.2	694.4	803.6	768
ATAAGCGCAAGACAGGCGTC	Standard	YJR061W::chr00_13:uptag	339.8	334.8	375.8	480.2	715.6	546.6	180	153
ATAAGGACAACGGACGCCCT	Standard	YGR144W::chr7_5:dntag	1491.6	1406	1776.2	1769.6	1571.8	1344	1001.6	1035.6
ATAAGGTAACCCGCATGACC	Standard	YCR003W::chr3_1:uptag	64.2	60.8	62.8	63	75.8	69.4	48.6	47.2
ATAAGGTGAACGACATCTCC	Standard	YJR062C::chr00_13:uptag	477.8	411.8	373.8	405	907.8	845	220.6	175.2
ATAAGGTTAAGGAAGCGTCC	Standard	YCR004C::chr3_1:uptag	50.6	52.75	56.2	54	67	54	52.6	44.2
ATAAGTACAACGCAGTCGCC	Standard	YJR063W::chr00_13:uptag	180.5	165	137.8	135.75	417.6	138.75	101.2	76
ATAATACAAGAGTCGCGCCG	Standard	YJR064W::chr00_13:uptag	70.2	66.6	68.6	67.6	92.25	73.6	60.4	55.6
ATAATCAGAACGACGTGTCC	Standard	YJR025C::chr00_13:dntag	770	668.6	648.8	805.333	1157	1005.4	571.4	799.6
ATAATCATAACCTCGACGCG	Standard	YJR026W::chr00_13:dntag	879.8	609.4	813.6	719.4	1148	1055.4	779	952
ATAATCCCAACCCTGATAGG	Standard	YGL131C::chr7_2:uptag	2852.2	2495.2	3102	3132.2	3909.2	2898	1474.2	1616.4
ATAATCGTAACGCACCGACG	Standard	YDL227C::ctrl_50:dntag	4128.8	4168.6	3682.4	4121.2	3259.5	3583.6	3105.8	2755.2
ATAATGAACGGAACGGCCCG	Standard	YDL200C::chr4_3:dntag	182	203.2	175.4	191.8	235.6	239.4	106.4	97.8
ATAATGTCAACGACGCTACC	Standard	YIL117C::chr9_2:uptag	68.2	68.4	68.25	69	91.25	81.4	57.4	51.8
ATAATTCCAACATGGGAGCC	Standard	YGR025W::chr7_3/chr00_12:dntag	129.8	105.2	172.2	146.6	276.2	207.2	100.6	119.2
ATAATTTAAGATGCCGGGCC	Standard	YGR026W::chr7_3:dntag	1013.8	1064.2	1274.2	1470.8	1453	1683.6	842.6	953.8
ATAATTTCAACCTAGCCGG	Standard	YGL132W::chr7_2:uptag	143.2	149.8	118	117.6	445.2	128.5	107.2	63.6
ATACAAACAGTGAGGCCCTG	Standard	YOL150C::chr00_10:uptag	409.4	376.4	333.75	274.8	560	650	190.2	165.4
ATACAACATTCATGCACCGG	Standard	YGR146C::chr7_5:dntag	1029.8	1131.2	1358.6	1183.4	1688.4	1117.6	931.6	941
ATACAACGTGATACACCCGT	Standard	YGR147C::chr7_5:dntag	62	57.25	59	58.2	75	62.2	54.6	50.2
ATACACTAACCTATCGACGG	Standard	YIL118W::chr9_2:uptag	58.75	51	57.4	57	81.6	65.6	52	51
ATACAGAAGATACGCTCCCG	Standard	YIL119C::chr9_2:uptag	839.4	815.2	865	956.8	1585.2	1334.4	261.2	245
ATACAGCCACACACTATGGT	Standard	YIL173W::chr9_2:uptag	261	309.4	267.6	250.4	634	267.4	220	140.8
ATACATCGAACGACCTATCG	Standard	YIL132C::chr9_2:dntag	968.4	941	1300	1243.25	1669	1839.6	1119.4	1137.2
ATACCAACGCACAATCGGTG	Standard	YGR148C::chr7_5:dntag	259.2	203.5	392.4	279.4	375.8	222.4	229.4	240.4
ATACCACCACACAATGTTGG	Standard	YDL201W::chr4_3:dntag	544.5	535.6	605.2	636	925.8	542.4	443	339.8
ATACCAGAAGCAACTCTCT	Standard	YIL133C::chr9_2:dntag	390.6	436	598.8	560.4	1446.8	586.2	609.6	507.8
ATACCAGTAACGATAGCTCC	Standard	YIL134W::chr9_2:dntag	59.6	60	64.2	64.8	84.8	71.8	47.8	49.6
ATACCCAGAACGACTATGCG	Standard	YIL135C::chr9_2:dntag	455.2	393.4	577.8	528	587	462.4	365	373
ATACCCGCAACGAATAGGCG	Standard	YIR011C::chr9_2:dntag	69.4	65.25	65	70.25	99.2	68.8	52.2	49
ATACCGGGAACGAAGAGTCC	Standard	YIR012W::chr9_2:dntag	86.6	92.6	85.5	85.6	103.2	101.2	47.2	57.6
ATACCTACAACGACTTACGG	Standard	YIR013C::chr9_2:dntag	1437.5	1564	1255	1114.2	1884.6	1569	1340	1319.6
ATACCTCTAACGAACTGACG	Standard	YIR014W::chr9_2:dntag	1879.2	1811.2	1529.6	1816.8	2906.2	2127.4	2019.6	1885.8
ATACCTGAACGAGCAATCCG	Standard	YOR147W::chr15_2:uptag	58.2	64.2	72.4	66	84.6	71.4	58.6	53.2
ATACGACGAACGACGGTACG	Standard	YOR148C::chr15_2:uptag	72.4	78	81.4	73.4	105	72.4	57.2	52.6
ATACGATTAACGACTCGGAC	Standard	YOR149C::chr15_2:uptag	84.2	72	76.6	72.2	87.3333	79.2	57.4	54.8
ATACGCACAACGAGTACGCG	Standard	YOR150W::chr15_2:uptag	98	87.8	82.4	81.2	160	94.8	64.8	57.4
ATACGCTAACGCACCTAGAG	Standard	YOR187W::chr15_2:uptag	94.25	98.6	84.8	88.2	199.75	92.4	63	59.4
ATACGCTGAACGACTGAGAC	Standard	YOR188W::chr15_2:uptag	3182	2434.4	2017.8	1942.2	4129	3207.4	1004.8	984.8
ATACGGAACCTAAGAGCCCG	Standard	YOR189W::chr15_2:uptag	2290.8	2593.4	2371	2376.4	1810.4	1788.2	1276.2	1203.4
ATACGGAGAACGAGGATCTT	Standard	YOR190W::chr15_2:uptag	2614.2	2273.4	2600.6	2637.2	4073.8	3166.8	996.2	882
ATACGGGTAACGACACTACG	Standard	YEL008W::chr5_2:uptag	1267.8	1194.4	1207.4	971.4	1147.6	1004.4	375.4	602.6
ATACGTCGAACCATCTTACG	Standard	YEL009C::chr5_2:uptag	67.2	61.8	71.6	68.2	94.2	79	52.2	51.6
ATACGTGAACCAGGTGGAAC	Standard	YEL010W::chr5_2:uptag	89.4	92	90.4	83.2	101.2	100.4	55	58
ATACGTGCAACCACTGCTAA	Standard	YEL011W::chr00_8:uptag	271.6	248.2	257	295.4	652	213.4	165.2	109.2
ATACGTTTAAGCACGCACAC	Standard	YEL047C::chr5_2:uptag	575	440.8	604.25	538.8	858.6	573.8	374.8	268.2
ATACTAATAACTCACGCCGG	Standard	YEL048C::chr5_2:uptag	414.4	427	381.4	310.4	834.8	446.4	213.8	134.8
ATACTACCAACGAGTCACGG	Standard	YEL049W::chr5_2:uptag	985.2	411.8	560.2	823.8	1069.8	563.4	295	314.2
ATACTCACAACGCGATACGG	Standard	YEL050C::chr5_2:uptag	76	85.8	64.2	71.2	105.25	78.4	56.6	49
ATACTCCAACCCTGGGATAA	Standard	YGR149W::chr7_5:dntag	2401.8	2054.4	2663.6	2546.4	3453.8	2358.4	1934.2	1988.6
ATACTCGAACCAGTTTCACG	Standard	YER007C-A::chr5_2:uptag	1137.2	799.2	635	1191.4	767	444.4	481.6	463
ATACTGCAACCATTTAGCCG	Standard	YGR150C::chr7_5:dntag	79.6	87.8	89.2	88	269.8	76.75	70.8	55.4
ATACTGGAACCGATCTACAC	Standard	YER007W::chr5_2:uptag	1011.8	1368	1359.6	995.2	1284.25	1209	781	516.6
ATACTGTCAACGAGACCACG	Standard	YER008C::chr5_2:uptag	58.2	62.4	63.6	65.6	84.6	68.4	50.6	51.2
ATACTTGCACCCAACGATGA	Standard	YNL064C::chr14_3:uptag	113.2	145	250	259	259.8	111	114.8	144.2
ATAGAACTCAATAGCCGCTC	Standard	YGR151C::chr7_5:dntag	300.6	290.4	346.2	271	834	446.8	143.8	138.6
ATAGAATAAGAGCTGCGCCG	Standard	YER009W::chr5_2:uptag	64.2	69.4	73.6	66.6	83.5	77.8	59.8	58.8
ATAGACGCAACGACTGCACG	Standard	YER056C-A::chr5_3:uptag	1602.75	1415	1793.8	1881	1715.8	1406.6	958.6	828.6
ATAGACTTAACGCACGATCC	Standard	YER057C::chr5_3:uptag	2693.4	2275.6	2519	2772.8	3570.4	2566.8	1513	1625
ATAGAGAACTCACACCCGTG	Standard	YGR152C::chr7_5:dntag	2565	2315.2	2613.6	2769.6	3034.75	3043.2	1755.2	1620.2
ATAGAGCGAACGATAGTTGC	Standard	YER058W::chr5_3:uptag	63.8	62.8	63.2	67.75	73	70.25	53.6	49.6
ATAGAGTCAACGAGCGTACC	Standard	YER059W::chr5_3:uptag	449.4	362.8	306	244	486.8	545.8	279.2	265.6
ATAGATATAACTGACGCGCC	Standard	YER106W::chr00_5:uptag	2572.4	2616.8	2632.4	2751.8	3184.6	3622.4	1679.8	1528
ATAGATTAACTACACCCGGC	Standard	YGR153W::chr7_5:dntag	1376.4	1204	1561.4	1711	3215	2237.2	1563.6	1609.4
ATAGATTGAACGAGCTGACC	Standard	YER107C::chr00_5:uptag	221.8	142.6	202.6	198.2	298.6	208.4	182.8	206.2
ATAGCAACGCCAACTACGTG	Standard	YGR154C::chr7_5:dntag	949.8	801.6	1111.5	918.8	1778.8	964.4	629	540.8
ATAGCACAACGTAGACGCCG	Standard	YER108C::chr00_5:uptag	2175	2025.6	2241	1915	2487.4	2658.2	1080.4	1021
ATAGCAGTAACGCATAGTCC	Standard	YER109C::chr00_5:uptag	1367	1244	1117.6	1291.75	2719.6	1210.5	713.2	798
ATAGCCATAACGATTACGGC	Standard	YER164W::chr00_5:uptag	851.2	531.8	866	1178.8	1246.2	761.75	498.6	389.2
ATAGCCCAACGCAAGAGCTG	Standard	YGR155W::chr7_5:dntag	237	296.6	220.6	201.4	606.4	247.6	176.6	92.8
ATAGCCTAACGACGAGACGG	Standard	YER165W::chr00_5:uptag	111	121.8	104.8	99	183.667	105	68	64
ATAGCGACAACGATCTACCG	Standard	YER166W::chr00_5:uptag	3434.8	2787.4	3102	3223.6	6194.6	5017.2	2103.8	2004
ATAGCGCGAACGAGGACACT	Standard	YER167W::chr00_5:uptag	1769.6	1610.4	1519.8	1959.4	2152.8	2076.2	915.4	930.6
ATAGCTCAATCAACGATGCG	Standard	YGR156W::chr7_5:dntag	59.6	57	58.2	58.6	83.25	64	50	47
ATAGCTCCAACCGCGTAGAA	Standard	YML104C::chr00_9:uptag	2235.4	1890.6	2327.6	2292	4369.8	3364	1386.8	1528
ATAGCTGTAACCCTTAGACC	Standard	YML103C::chr00_9:uptag	1471.8	1598.4	1322.4	1059	2077.6	1719.6	840.6	703.8
ATAGGAAGAAGGACTCGTCT	Standard	YML102W::chr00_9:uptag	2289.2	2256.6	2311	1799	2192.4	2500.6	1188.8	1136.8
ATAGGACAACTACACTTCCG	Standard	YML102C-A::chr00_9:uptag	67.2	60.2	65.75	57	88.2	61.75	49.2	44.8
ATAGGCCCAACGCCAAGAGT	Standard	YDR162C::chr4_5:dntag	320.6	355	364.8	365.6	693.4	287.6	232.2	135.4
ATAGGGCAACGCACCGTAAC	Standard	YML043C::chr13_1b:uptag	68.4	92	69.4	62	85.6	68.6	53.2	47.8
ATAGGTATAACGCAGTACGC	Standard	YLR361C::chr00_11:uptag	4039	4186.4	4102.25	3832.2	4757.8	4976.2	2304.4	2298.4
ATAGGTCGAACGAGAGACTC	Standard	YMR013C::chr13_2:uptag	65.8	66.2	58	62.4	80.2	64.8	54.4	54.2
ATAGGTTACAGGCGTATTC	Standard	YFR031C-A::chr6_1:dntag	153.2	148.8	156.2	181.2	312.8	285	196	171.6
ATAGGTTCAACTAACGTGCC	Standard	YMR014W::chr13_2:uptag	48.6	47.2	51	52.4	64.4	54.2	40.6	40.2
ATAGTAACCTCAATACGCGC	Standard	YMR015C::chr13_2:uptag	2853.2	2568	2799.4	2351	4039.4	4073.4	1785.6	1898.8
ATAGTAAGACACCAGCCGCG	Standard	YMR016C::chr13_2:uptag	277.2	335.4	252.4	237.8	681.4	261.6	188	103
ATAGTACGAACGATCCGTCA	Standard	YER123W::chr00_5:dntag	327.75	313	310.6	261	709.4	599.8	271.4	263.4
ATAGTCAACCGAGTCACACG	Standard	YER124C::chr00_5:dntag	591.2	614	802.6	829.8	1196.4	1140.4	672.8	910.8
ATAGTCAGAACGATTGAGCC	Standard	YER125W::chr00_5:dntag	71.6	69.4	71.6	79.6	99.4	82.8	55.2	54.6
ATAGTCGTAACGCGAATACC	Standard	YER126C::chr00_5:dntag	56.6	50.4	61	56.4	65.6	68.8	51	48.2
ATAGTGACAACTCAGCACCG	Standard	YMR133W::chr00_9:uptag	960.2	875.8	1040.75	924.75	1663.2	925.5	500.2	453
ATAGTGCAACCCGCGCAGAA	Standard	YGR157W::chr7_5:dntag	172	171.75	185	166	413.8	189	165.4	94.6
ATAGTGTAACGAGGCTGAAC	Standard	YMR134W::chr00_9:uptag	63.4	64	64.5	59.2	77.8	65	50	47.4
ATAGTTCAACCGCGACTCAA	Standard	YGR158C::chr7_5:dntag	73.4	76.2	73.4	72.2	98.75	79.2	57.2	52.4
ATAGTTCCAACGAGCTTTCC	Standard	YCR005C::chr3_1:uptag	1280.4	1274.6	1516.2	1624.2	2820.4	2232.2	771.8	827
ATAGTTCGACCCACAAGCAG	Standard	YML031W::chr00_12:uptag	272.2	305.8	227.2	203.2	692.2	259.4	190.8	95.8
ATAGTTGAACCATTCGTCCC	Standard	YCR006C::chr3_1:uptag	2124.4	2015.2	2149	2489	4432.5	3052	1229.4	1021.4
ATATAAATCGCATACCGCGC	Standard	YMR135C::chr00_9:uptag	1173.6	949.2	837.4	885.8	960.2	1227.2	911.4	841.2
ATATAACGGTACCACCCGTG	Standard	YMR191W::chr13_4:uptag	63.6	57.6	63.8	62.8	88.6	63.2	46.6	44.6
ATATAATCAAGACTGGCGCG	Standard	YGR159C::chr7_5:dntag	62.6	61.4	59.2	60.4	70.75	66	48.6	45.4
ATATAATTCACGACACCGCG	Standard	YMR192W::chr13_4:uptag	840.6	725	557.8	601.6	992.8	659.2	558	445.4
ATATACACAAGGACCTCGCG	Standard	YMR193W::chr13_4:uptag	86.8	94.8	85.6	93.6	104.6	98.8	61.6	50.8
ATATACGTCACCACAAGCGG	Standard	YMR194W::chr13_4:uptag	355	362.2	318.4	293.8	820.8	332.8	244.8	173.6
ATATAGAACGGAAGCGCCGC	Standard	YMR161W::chr13_4:dntag	1326.2	973.6	752.75	955.8	1582.6	1635.4	1237.6	1237.6
ATATAGAGAAGAGGCTCGCC	Standard	YMR162C::chr13_4:dntag	2892	2114.2	2618.8	2240.2	4140.5	2740.2	1937.6	1962.2
ATATAGTCAACGATGGGACC	Standard	YMR163C::chr13_4:dntag	631.8	833	718.8	647.8	1581.75	855.2	666.2	730.2
ATATCAACCGCACGGAACGG	Standard	YMR164C::chr13_4:dntag	1270.4	1041	1373.6	1028.75	1732.8	1228.6	857	1089
ATATCAATAACTGCGACGCC	Standard	YMR222C::chr13_4:dntag	202.2	166.4	211.6	172.8	423.75	232.8	177.8	201.8
ATATCCACAACGCCTAAGGG	Standard	YDL202W::chr4_3:dntag	270.75	347.6	235	205.8	667.4	271.6	175.4	92.6
ATATCCTAACGACTTCTCGG	Standard	YMR223W::chr13_4:dntag	1006.4	932.6	1065	963.6	1247.8	839.8	841.2	894.4
ATATCGAGAACCCTCACTAG	Standard	YMR224C::chr13_4:dntag	63.8	72	255.5	206.4	275.8	195.4	227.8	109
ATATCGCGCAATCAACGCTA	Standard	YMR225C::chr13_4:dntag	3477.8	3159	3629.4	4135.6	6902.4	5578	4103.6	4123.4
ATATCGGAACGCACGCTAAC	Standard	YLR153C::chr00_12:uptag	85.4	80	76.8	77.4	109.2	88.6	63.8	54.8
ATATCGTAACGGAAGACGCG	Standard	YAL015C::chr1_1:uptag	3593.8	3375.2	3467.25	4062.2	4728.5	3885.4	2155.8	2323.4
ATATCGTGAACCATTGGAC	Standard	YGR160W::chr7_5:dntag	52.4	49.6	51.8	55.4	67.8	53.8	44.8	42.4
ATATCGTTAAGCCATACGCC	Standard	YAL014C::chr1_1:uptag	1165	917.2	981.6	1183.6	1769.6	1485	596.8	560
ATATCTCTAACGCGCATAG	Standard	YAL013W::chr1_1:uptag	858.6	435.2	1287.2	1295.8	188.8	182.4	518	500.4
ATATCTGAACCGACTATCCG	Standard	YER034W::chr5_3:dntag	1154	1143.6	1435.8	1390	2192.2	1362.4	1334.6	1362.6
ATATCTTTAACGTCGAGCGC	Standard	YER035W::chr5_3:dntag	498.2	371.8	617.5	461	613	470.6	454.2	454.4
ATATGAATAACTCCAGCGCC	Standard	YCR007C::chr3_1:uptag	242	284.6	270.8	252.6	607.2	248.4	131	99.8
ATATGAGTAACCGCGAGCAC	Standard	YER036C::chr5_3:dntag	98.2	83.6	84.6	94.2	144.4	103	104.6	70
ATATGATCCAATCCAACGCG	Standard	YGR161C::chr7_5:dntag	1514	1285.2	1583.75	1559.4	2525.2	2153	1152.8	1120.4
ATATGATGAACGCGAAGGCC	Standard	YCR008W::chr3_1:uptag	1660.2	1671	2252	2237.2	1399.2	1703.8	984.6	905.2
ATATGCACAACGCGCAATCG	Standard	YER037W::chr5_3:dntag	81	86	81.8	70	113.4	78.2	55.4	49.6
ATATGCTAACGACCAGTAC	Standard	YIL116W::chr9_2:uptag	146.4	129.8	112.2	109.8	412.5	121.8	97.2	68.2
ATATGGAACCGCATGTAACC	Standard	YGR162W::chr00_17a:dntag	97.6	94	105.6	100.25	143	129.25	92.8	81
ATATGGACAACCCTCTACAG	Standard	YER088C::chr00_8:dntag	442.4	482.4	594.4	490.8	705.4	773	246	302.8
ATATGGCCCAATAAGAGGTC	Standard	YGR163W::chr7_5:dntag	1377.8	1185	2297.2	2439	2629.8	850	1005	958.6
ATATGTACCAAGGAAGCGGC	Standard	YCR009C::chr3_1:uptag	964.2	538.2	1084.6	687.4	358.4	104	330	282.6
ATATGTATAACGCCTACCCG	Standard	YER089C::chr00_17a:dntag	1829.4	1966.6	1848.4	1704	3016.8	2650.4	1751.6	1782.6
ATATGTCAACGCACACAGCG	Standard	YER090W::chr00_8:dntag	241.6	266.2	217.5	203.6	587.4	237.6	174.8	108.6
ATATTAACCTATCTCCGGCG	Standard	YGR164W::chr7_5:dntag	724.2	513.6	717.75	482.2	1085.8	604.2	609	602.6
ATATTAAGAAGTAGGCGGCC	Standard	YCR010C::chr3_1:uptag	3649.6	3721.6	3323.5	3466.4	3672	4022.4	1932.8	1776
ATATTCAACATTGCCACCGG	Standard	YGR165W::chr7_5:dntag	213	209.6	171	140.6	605.4	185.6	132.4	72
ATATTCCAACAGTTCTGCCG	Standard	YDL203C::chr4_3:dntag	1512	1420.6	1627.8	1459	1560.8	1119.6	619.8	535.8
ATATTCGACAGTAACGCCGA	Standard	YGR166W::chr7_5:dntag	848.6	843	799.6	841.2	1284	1011	697.6	600
ATATTCGCAACCTACGTCGA	Standard	YER091C::chr00_8:dntag	125	102.8	121	108.75	160.6	130.2	114.2	108.2
ATATTGAACCTCCACACAGG	Standard	YGR167W::chr7_5:dntag	231.2	248.2	197.8	188.8	580.25	245.8	155	86.8
ATATTGCCAACCCGCTGAGA	Standard	YLR190W::chr12_3:uptag	251.2	260.4	220.4	200.4	625.2	223.4	161.2	87.6
ATATTGGTAACCGGACGCAA	Standard	YNL063W::chr14_3:uptag	3213.8	2653	2892.2	2753.2	3869	3156.75	1681.8	2093.4
ATATTTCTAACGCCAGTCCG	Standard	YHR001W-A::chr8_1:uptag	273.8	316	278.8	296	673.75	288.6	192.8	127.6
ATATTTGGAACGCAGCTCAC	Standard	YCR011C::chr3_1:uptag	287.2	302.75	264.6	322.4	705.6	458	161	134.8
ATCAAAGGTTGGGACAAGCC	Standard	YGR168C::chr7_5:dntag	1277.6	910	1131.8	915.6	2345.2	1646.2	1251.2	1363.2
ATCAAAGTTTCGAGAACCGC	Standard	YGR169C::chr7_5:dntag	1655.6	1432.2	1375.8	1819	3594.4	2824.8	1942.2	2119.2
ATCAAATCAATTACGCCGCG	Standard	YDL204W::chr4_3:dntag	1945.4	1562.4	2254.6	1884.2	2004	2524	1743.6	1751.4
ATCAACAGGTTTCAAGACCG	Standard	YDL205C::chr4_3:dntag	70.6	73.8	71.8	78.4	93.8	68.8	66.4	50.6
ATCAACCCGTTAGAACAGGC	Standard	YGR170W::chr7_5:dntag	889.2	644.25	897	1128	1443	1283.8	708	702.4
ATCAACCGATGCGAACCTAG	Standard	YGR171C::chr7_5:dntag	74.4	70	68.4	67	92.8	72.6	57.6	54.2
ATCAACGGACAATACCTGCT	Standard	YLR030W::chr00_8:dntag	2705.8	2520.2	2398.2	2264.6	3688.25	3398.4	2001.4	2311.4
ATCAACTGAACCTCATACGG	Standard	YHR003C::chr00_10:uptag	2903	2325.5	2926.4	2928.25	3133.8	3213.8	1468.6	1429.4
ATCAAGGAAGCCACACCTGT	Standard	YDR163W::chr4_5:dntag	586.6	535	755.8	699.2	1080.2	657.75	422.8	302.8
ATCAAGGCAACCGCCAGGAG	Standard	YGR172C::chr7_5:dntag	245.4	298	214.4	202.2	630.6	244.8	176	92
ATCAAGTCAACCTACTACGG	Standard	YHR004C::chr00_10:uptag	470	343.8	500.2	446.6	135.5	374.4	214.4	156
ATCACATTAACGGAAGGCCC	Standard	YDR507C::chr4_8:dntag	64	66.2	65.2	70.75	91	75.2	63.2	50.6
ATCACCACACAGAAGTCGGG	Standard	YGR173W::chr7_5:dntag	429.6	448.5	378.2	360	987.8	507.6	315	210.4
ATCACCGAACCGCAGTTAAG	Standard	YHL031C::chr8_1:dntag	597.8	543.2	601.6	554.5	835.2	442.75	373.6	331.8
ATCACGGGAACCGAGGTACA	Standard	YHL030W::chr8_1:dntag	1092.8	872.6	934	948.2	1622.8	1008.8	607.6	961.8
ATCACTGTAACCTACGTTCG	Standard	YHL029C::chr8_1:dntag	675.4	704.75	1159.8	1053.6	1554.8	1568	1004.2	747.8
ATCACTTCAACCTAGACAGG	Standard	YHR030C::chr8_1:dntag	222.6	347.5	381.2	677.2	485	717.4	339.2	197.2
ATCAGAAGAACTGCACGTCC	Standard	YHR031C::chr8_1:dntag	370	259.6	287.8	331	698.4	259.2	280.2	346.8
ATCAGATCAACCCCACTAGG	Standard	YHR032W::chr00_8:dntag	1660	1684.4	1911.2	1563	3081.2	1904.75	1215.8	1397.8
ATCAGCATAACCTCTAGCGA	Standard	YHR033W::chr8_1:dntag	480.8	420	495	390	565.4	630.4	339.2	424
ATCAGCGCAACCGATATACG	Standard	YPL240C::chr16_1:uptag	1244.6	947	1082.2	1203.4	2436.4	1705.6	550.2	518.8
ATCAGGTCAACTAATCACCG	Standard	YPL239W::chr16_1:uptag	146.2	91.2	139	137.2	131.6	80.8	65	68.6
ATCAGGTGACACACAATCCT	Standard	YGR174C::chr7_5:dntag	76	83	73.6	81.6667	93.4	74.8	63.2	72.8
ATCAGTACAACGGACATGCC	Standard	YPL237W::chr16_1:uptag	87	88.8	83.4	84.4	153.8	85.6	58.4	51.6
ATCAGTATAACTACGAGGCC	Standard	YPL238C::chr16_1:uptag	83	73.6	78.2	78.4	98.2	91.8	62.6	63
ATCAGTCCAACCTACAGATG	Standard	YDL227C::ctrl_18:uptag	672	633.75	649.4	676	601.8	614.4	418	359
ATCATACAACTTCAGACCGG	Standard	YGR176W::chr7_5:dntag	1925.8	2280	1976.2	2251.25	3083.6	3115	1713	1564.6
ATCATACGTAATAGGGCGG	Standard	YGR175C::chr7_5:dntag	58.4	58.6	66.4	59.2	85.5	71.8	50.4	46.4
ATCATACTAACGGATCGACC	Standard	YPL274W::chr16_1:dntag	1590	1373.6	1218.6	1256.6	3058.4	2568.6	1458.2	1612
ATCATAGGAACGTATAGTCC	Standard	YPL218W::chr16_1:dntag	65	55	57.4	55	71.6	64.6	50	48.8
ATCATCATAACTACGCACGG	Standard	YDL227C::ctrl_48:dntag	5697.2	5614	5694.6	6011.2	4183.25	4342.6	3105.8	2755
ATCATGTGAACCTATTGGCC	Standard	YDR508C::chr4_8:dntag	136.4	108.2	167	189	185.8	138.8	105.4	132.4
ATCATTATACATCACGCCGG	Standard	YPL216W::chr16_1:dntag	244	235.4	222.6	177.8	682	272.8	177.4	136.6
ATCATTCAACCTCCATGTGG	Standard	YGL135W::chr7_2:uptag	44.8	42.4	48	47.4	67.2	50	45.6	39
ATCATTGTAATCGCGTGACA	Standard	YPL215W::chr16_1:dntag	51	47.2	50.8	50.2	65.8	49.6	42	39.2
ATCATTTCAACGCAGTGACC	Standard	YCR012W::chr3_1:uptag	75.6	86.2	63.6	67.6	100.8	70.6	59.6	47.6
ATCCAACCGGGAGGAACCTA	Standard	YLR191W::chr12_3:uptag	548.2	465.8	524.4	436.4	415.6	343.8	312	283.4
ATCCAACGCCATCTAAGAGG	Standard	YDL206W::chr4_3:dntag	210.4	248	192.2	157	575.8	204	150.6	80.4
ATCCACAACTAATCGACGGT	Standard	YNL311C::chr14_1:uptag	1825	1409	1648	1458.6	2206.2	983.4	924.8	899.4
ATCCACGAACCTCGGAGAAG	Standard	YNL310C::chr14_1:uptag	63.8	74.2	66.4	68.5	91.8	69.2	57.6	51.6
ATCCACGGAACGCAGTCAGA	Standard	YNL309W::chr14_1:uptag	335.8	364.2	294	257.4	772	357	250.6	157.6
ATCCACGTAACCCTGTATAG	Standard	YNL308C::chr14_1:uptag	70.4	67.6	67.2	71	88	75.2	58.4	60
ATCCAGAGAACGTGAGATCC	Standard	YNL251C::chr14_1:uptag	100.8	110.2	90.5	83.25	215.4	106	77.8	63.8
ATCCAGCTAACCCTATTTGG	Standard	YGL136C::chr7_2:uptag	158.4	133	64.2	115.8	99.6	143.6	105.6	85
ATCCAGGGAACCTTACTACA	Standard	YNL062C::chr14_3:uptag	61	65.8	55.4	63.25	69.4	63	47	43.4
ATCCAGTAACCCTTCAGAGA	Standard	YGR177C::chr7_5:dntag	1767.2	1953	2059.6	1809.75	2550.4	2251.2	1202.8	1142.2
ATCCATACAGAAGGAGCGCG	Standard	YNL250W::chr00_8:uptag	129.4	132.2	113.2	108.25	282	139.6	92.8	71.8
ATCCATGAACATTGCGACAG	Standard	YDL207W::chr4_3:dntag	83.8	94.2	91.4	73	329.4	80.6	75.4	48.4
ATCCCAACCTAATCAGAGTG	Standard	YDL208W::chr4_3:dntag	83.5	89.8	81	79.2	156.2	82.8	67.8	52
ATCCCACGAACGATGAATCT	Standard	YLR031W::chr00_8:dntag	1535.4	1330	1394.8	1522.8	2498	1742.2	1215	1263
ATCCCATAACATTTAGCGCG	Standard	YDL209C::chr4_3:dntag	51.6	50.6	52	46.8	63.6	53.75	41.2	40.6
ATCCCATCAACCTGGAATAG	Standard	YGL137W::chr7_2:uptag	47.75	56.4	45.2	51.4	56.6	49.2	38.4	40.8
ATCCCGAACGATCTCTAAGA	Standard	YNL249C::chr14_1:uptag	2579	2069.2	2440.2	2466.4	3102.4	2619	1312.2	1585
ATCCCGACAACCGTGAATAG	Standard	YNL248C::chr14_1:uptag	57	58.4	59	65	74.4	69.2	49.6	48.4
ATCCCGGTAACCATCGTAGA	Standard	YNL295W::chr14_1:dntag	1052.2	1082	1035.6	1052.8	1699	1153.6	1220.2	1445.8
ATCCCTACACAACTGGGTAT	Standard	YLR032W::chr00_8:dntag	1381.6	1278.4	1899.6	1842.8	1990.4	1961.8	1210	980.2
ATCCCTATACCCGGGTTGAG	Standard	YJR113C::chr00_12:uptag	56	50.4	53.6	54.6	70.4	55.4	46	44.2
ATCCCTTGAACCCTGTGAGA	Standard	YKL030W::chr00_12:uptag	3070.33	3002.2	3225.75	3184	4841.6	3883	1924	1792
ATCCGACAACCTGCTAGAAG	Standard	YOR127W::chr15_2:dntag	1503.2	1571.6	1641.2	1614.6	2482.8	1490.6	1338.4	1222.6
ATCCGACGAACCGTTACGAA	Standard	YNL294C::chr14_1:dntag	1008.2	874.4	1223.2	1341	1130.8	1116	713.8	516.8
ATCCGCCCAACGGGAAGATA	Standard	YLR193C::chr12_3:uptag	1078.4	890.8	1532.4	1598.5	3098.6	1564.2	943	1165.8
ATCCGCGAACATTTAATCCG	Standard	YDL210W::chr4_3:dntag	3627.4	3512.4	3637.4	3901.6	4082.8	3039.5	2452	2341.8
ATCCGGCCAACCGTTATAGA	Standard	YNL057W::chr14_3:uptag	1927.8	1826	1472.4	1714	3981	2516.4	1184.8	1291
ATCCGGGTAACCGCTCGATA	Standard	YNL293W::chr14_1:dntag	2257.6	1958	1698.2	1662.2	3222.6	2521.4	2428.4	2100.6
ATCCGGTTAAGATGTAAGCC	Standard	YCR013C::chr3_1:uptag	66.4	70	69.6	74	93.4	79.6	55.4	53.2
ATCCGTTCACAAGACCAGAG	Standard	YOR128C::chr15_2:dntag	479.2	425.5	348.4	296.4	1091.4	496.8	296.8	204
ATCCTAAGAACGTATCACGC	Standard	YNL292W::chr14_1:dntag	1908.6	1161.6	1446.4	1254.8	2230.2	1817	1719.8	1649.8
ATCCTAGTAACCGCTGCATA	Standard	YNL247W::chr14_1:dntag	72	72.25	73	75.4	115.25	75	55.2	52.2
ATCCTCAACGATTCAGAACG	Standard	YGR178C::chr7_5:dntag	2501.8	2595	2985	2660.75	5144.6	4400.8	2831	2678.4
ATCCTCGAACATGGCGTAAC	Standard	YNL246W::chr14_1:dntag	881.4	1100.4	891.667	829.75	1288	1061	1436.2	1598.6
ATCCTCGCAACCGTTTAGAA	Standard	YNL058C::chr14_3:uptag	1479	1341	1421.6	1380	2821.4	2200.4	827	921.4
ATCCTGAACGCAGAGACACG	Standard	YNL245C::chr14_1:dntag	151.4	145	121.2	118.4	330	139.2	89.8	68
ATCCTGCGAACCGCTGATAA	Standard	YNL056W::chr00_16b:uptag	56.8	66.2	66.8	55	98.2	61.2	51.6	54.8
ATCCTTCGACATCGCAAGAA	Standard	YGR179C::chr7_5:dntag	64.6	63.8	67	70.75	124	81.2	53.8	48.6
ATCCTTGCACATGAACGTAC	Standard	YNL244C::chr00_8:dntag	72.6	72.6	68.2	82.8	97.6	72	49	46
ATCGAAATACACATCCGTGC	Standard	YGR181W::chr7_5:dntag	1511.4	1215.2	1468.2	1501.4	1900.6	1602.2	1128.6	999.2
ATCGAAATTAATAGGCCGTC	Standard	YGR180C::chr7_5:dntag	73.8	72.2	68.4	68	92.6	73	54.6	54
ATCGAACCGCACTCAAGAGG	Standard	YGR182C::chr7_5:dntag	2494.2	2405.5	2487.2	2198.8	3503.8	2497.8	1775.8	2190.2
ATCGAACGCAAGTACACCTG	Standard	YGR183C::chr7_5:dntag	1007.6	930	3241	2195.6	431.75	1791	1462.4	1316
ATCGAACTAACGTACATGCC	Standard	YMR274C::chr13_5:uptag	2856.5	2754.8	2363	2266.8	5036.8	3186.8	2165.2	2290.4
ATCGAAGAACTAGAGCTGCC	Standard	YGR184C::chr7_5:dntag	943.2	848.8	856	831.8	1086	626.2	553.4	604.2
ATCGAAGGAACGCTAAGTTC	Standard	YMR275C::chr13_5:uptag	1437.8	1429.4	1386.8	1535.8	1471.25	1491.8	698	670.4
ATCGACACAACTGTAGACCG	Standard	YMR276W::chr13_5:uptag	3045.8	2572	2156.4	2715.8	5321.4	3836.6	1904.2	1971.4
ATCGACCCAAGAATAGCTCG	Standard	YOR129C::chr15_2:dntag	2112.4	1602.2	1595.4	1302.8	3386.4	1420.6	1838.8	1749
ATCGACCTAACCGTCTAGTA	Standard	YMR277W::chr13_5:uptag	61.4	72	63	78	82.3333	79.6	51.2	54.2
ATCGACGGAACCTTATGACA	Standard	YMR316C-A::chr00_8:uptag	263	200	241	187.8	1162	560	131	103.2
ATCGAGGCACAACTACATTC	Standard	YGR185C::chr7_5:dntag	71.4	75.6	73.4	77	95	77	64.6	54.6
ATCGAGGTAACGCCATATAC	Standard	YMR317W::chr00_8:uptag	3045.2	2548	2554.8	2880.8	3979	3552	1083.2	1149.6
ATCGAGTCAACCGGCCTAGA	Standard	YMR316C-B::chr00_8:uptag	1542.4	1220.2	1150	1062	2068.6	1737.2	751	573.6
ATCGCACGAACCTGTAATAC	Standard	YMR318C::chr00_8:uptag	3141.8	3371.2	3099.6	3064	3933	3432.4	1686.8	1794.4
ATCGCAGAACCTCGACTAAG	Standard	YMR272C::chr13_5:dntag	121.2	132.8	120.4	129.6	219.25	113.4	78	100.6
ATCGCCGTAACCGCTTTAGA	Standard	YMR273C::chr13_5:dntag	3772.6	3241.2	2789	3026.4	5613	4738.2	3464	3359.4
ATCGCCTAACCTAGATACAG	Standard	YMR274C::chr13_5:dntag	2123	2107	1943.2	1871.6	3960.25	2370.8	1973.4	2074.4
ATCGCGCACCAACGGGATTA	Standard	YGR186W::chr7_5:dntag	81	83.6	72.8	79	153	85.2	59	53.8
ATCGCGTTAAGAGTGAAGAC	Standard	YMR275C::chr13_5:dntag	1158.8	1154.2	1189.6	1381.4	1359.8	1231.2	1202.8	1307
ATCGCTCAACATTTATGCCG	Standard	YDL211C::chr4_3:dntag	70.4	76.6	81.6	70.4	94.4	74	58.6	52.6
ATCGCTCTAACCGTCGGAGA	Standard	YMR315W::chr00_8:dntag	2698.4	2307.8	2307.4	2750.2	4717.8	3251	2888.8	3006.8
ATCGCTGGAACCGGGCTTAA	Standard	YLR194C::chr12_3:uptag	2768.4	2514.8	2423.6	2382.4	4049	2929.2	1458.4	1316.6
ATCGGAACCTACTTACAAGC	Standard	YMR316W::chr00_8:dntag	1916	1800.4	1970.6	1905	4074	1970.6	2026.8	2097
ATCGGAAGAATCTGAATCC	Standard	YCR014C::chr3_1:uptag	138	148.6	165.2	249.4	352.2	402.8	124.6	87.8
ATCGGAATAACGGTGAAGCC	Standard	YCR015C::chr3_1:uptag	141.4	148.6	166.2	160.4	194	177.6	84.4	78.4
ATCGGCAGACAAGCGGATAC	Standard	YGR187C::chr7_5:dntag	880.6	814.8	1079.25	1182.2	1475.2	869.4	1019.4	925.8
ATCGGCGGAACCGGATCATA	Standard	YNL054W::chr14_3:uptag	105.4	87.6	97.4	85.4	275.6	117	68	58.8
ATCGGGCAACCGCTCTAGTA	Standard	YOL151W::chr00_17b/chr00_18:uptag	2973.4	2459.8	2776.8	2939.4	4934.6	4041.8	1927.8	1773
ATCGGGGCGCCAGCCAATA	Standard	YLR195C::chr12_3:uptag	220.4	262.8	201.6	169	562	220.8	153.2	79.4
ATCGGGTAACCTCCCAGAAA	Standard	YLR196W::chr12_3:uptag	90.4	91.8	80.8	80.6	309.4	94.4	62.4	52
ATCGGTAACGAGGTCGAACT	Standard	YMR316C-A::chr00_8:dntag	590.2	459	525.25	504.8	1143	857.5	545.8	520.6
ATCGGTGAACCTGCGCCTAA	Standard	YNL052W::chr00_16b:uptag	74	85.2	90.6	88.75	119.6	86.6	67.8	70.8
ATCGGTTCACAACTACTACG	Standard	YJL184W::chr10_1:uptag	66.4	74.5	68.25	70.6	84.25	76	60	52.4
ATCGTAACCTCATTCAACGG	Standard	YOR130C::chr15_2:dntag	66	66.5	69.6	71.6	90.8	83.6	58.2	53.6
ATCGTACTAACCTGTAGCAC	Standard	YJL183W::chr10_1:uptag	55.25	50.8	50.6	49	71.6	55.5	46.8	43.2
ATCGTATCAACCGTGCAGAA	Standard	YJL181W::chr10_1:uptag	3294	2697.4	3444	3641.4	4184.2	3142	1622.4	1452.6
ATCGTCAACGCCAATTAAGC	Standard	YCR016W::chr3_1:uptag	1307.8	1129.25	1527	1373	2676.8	1583.2	798.2	824
ATCGTCACAAGCACGGACAG	Standard	YGR189C::chr7_5:dntag	287.6	344.6	259.8	239.8	743.5	297.2	206.4	109.4
ATCGTCAGAACCGTATGTAC	Standard	YJL182C::chr10_1:uptag	2611.4	2330.2	2236	3004.2	4144.8	2733.4	1185.4	1163
ATCGTCGAACCCTCGGATA	Standard	YMR317W::chr00_8:dntag	2538.4	2070.8	2201.4	2274.6	4080.2	3607	2231.6	2483.6
ATCGTCGTAACCGGCGCATA	Standard	YJL132W::chr10_1:uptag	82.8	73.2	66.5	75	95.8	93	59.2	57.8
ATCGTCTTAACGCGAGAGAA	Standard	YJL131C::chr10_1:uptag	102.2	90.4	88.2	83.8	225.75	87	71	56
ATCGTGACAACCTCTCATAG	Standard	YJL130C::chr10_1:uptag	195	121.4	130	115	593.4	411	98.6	74
ATCGTGAGACACAGAGACGT	Standard	YJL129C::chr10_1:uptag	251.4	268.2	209.2	183.8	562.8	213.6	157.2	88.4
ATCGTGATACAGAAGTACCG	Standard	YGR190C::chr7_5:dntag	89.8	92.25	93.75	91.4	131.25	103	62.4	64.2
ATCGTGTAACGCAATCACAG	Standard	YJL178C::chr10_1:dntag	348.2	309.6	343.6	350.8	894	318.6	216	254.8
ATCGTGTCACAAGATAAGGG	Standard	YOR131C::chr15_2:dntag	2133.4	1894.6	2002.2	2283.5	5173.4	3807.5	2021	1890.6
ATCGTTAAGGAGGAAGACTC	Standard	YGR191W::chr7_5:dntag	65.8	66.4	78.5	72	96.2	89.2	56.2	49.6
ATCGTTACACAATTTGAGCG	Standard	YJL177W::chr00_14:dntag	1258.6	961	1376.6	1277.2	1621.6	1593.4	797.4	865.4
ATCGTTCGACATCTAGACG	Standard	YJL176C::chr10_1:dntag	58.25	51	54.6	53.2	78.2	62.8	47.6	42.4
ATCGTTGCACCAGAACTACA	Standard	YGR192C::chr7_5:dntag	952.2	1019.8	1083.4	1148.6	1403.4	1423.6	868.2	758.4
ATCGTTTAAGAGTCCACACC	Standard	YJL127C::chr10_2:uptag	110.2	119.8	111.6	90.6	301.25	102.4	81.4	57.8
ATCTAAATCTTATGCCCGCG	Standard	YDL212W::chr4_3:dntag	62.2	57.8	73.75	65	84.8	68	56.4	53.6
ATCTAACCGTGTACCACAGA	Standard	YGR193C::chr7_5:dntag	378.8	397.6	340.5	292.5	873.8	400.25	261.6	233.2
ATCTAACTAACGCTACGACG	Standard	YJL126W::chr10_2:uptag	513.6	514.2	447	450.6	531.4	626.8	256.4	259
ATCTAAGAAGACATGCTCGG	Standard	YOR132W::chr15_2:dntag	917.4	754.6	797	703.2	1352	1021	878.2	1002.2
ATCTAAGCAACTCACAGTCG	Standard	YJL125C::chr00_15:uptag	224	250	197.8	181.6	666.4	237.6	161.4	88.2
ATCTACGAACGCGCACGAAG	Standard	YJL124C::chr10_2:uptag	704.2	1147	820	932.8	1792	1459.5	715.6	653.6
ATCTACTGACAAGACGGACG	Standard	YJL073W::chr10_2:uptag	2857.6	2572.4	3244.4	3128.2	4584	3617.2	1643.4	1533.4
ATCTACTTAACGCGCTACAG	Standard	YJL072C::chr10_2:uptag	72.6	83.4	71.8	68.2	88	75.4	59.6	52.4
ATCTAGCAATCAAGGACCGG	Standard	YGR194C::chr7_5:dntag	2990.4	2742.2	3051.6	2845.2	5068.8	3533.4	2938.8	3168.6
ATCTAGCGAACGGAACTATC	Standard	YJL071W::chr10_2:uptag	69.4	68.4	64	65.4	105	70	59.2	51.8
ATCTAGTCAACCTGAGCTAC	Standard	YJL070C::chr00_15:uptag	2499.8	1677.6	2619.2	2407.4	3008.8	2090.2	996.2	1028
ATCTATGCAACCGCGTCAGA	Standard	YJL121C::chr10_2:dntag	254.8	280	394.4	233.6	483.4	197.2	228.8	253.6
ATCTATGGAACCTCTACTCG	Standard	YGR195W::chr7_5:dntag	51.4	48	48.6	47.6	59.6	51.8	43.8	40.4
ATCTATTCAACGCGACATCG	Standard	YJL118W::chr10_2:dntag	71.2	62.4	68	64.6	86.6	73.4	55.2	52.6
ATCTCAATAACGGTTCACGC	Standard	YJL119C::chr10_2:dntag	1870.4	1718.8	1653.6	1556.4	3044.33	2148.6	1403.2	1477.4
ATCTCACTACAAGAGCCTAG	Standard	YJL117W::chr10_2:dntag	95.4	106	91.75	94	176.5	97.8	64.4	56.8
ATCTCAGAACCTCTATACGG	Standard	YGR196C::chr7_5:dntag	2932.4	2636.6	2852	2933.8	4519	3857	2966.6	2722.8
ATCTCAGCAACCTTCAGTAG	Standard	YOR133W::chr15_2:dntag	133.6	125.6	124.8	113.75	283.2	109.4	92.6	66.2
ATCTCAGGACAATACAGCCT	Standard	YGR197C::chr7_5:dntag	161.2	171.2	140.4	129.4	510.4	173.25	119	84.4
ATCTCAGTAACTAAGGACCC	Standard	YJL067W::chr10_2:dntag	1979.6	1676.6	2057.75	2069.5	3545.4	2402	2007.2	1805
ATCTCATAAGAATGGACGCG	Standard	YOR134W::chr15_2:dntag	2040.2	2141	2054.6	1942	3265.8	3013.5	2115.6	2048.8
ATCTCATGCAATGCCAACTG	Standard	YGR198W::chr7_5:dntag	102	111.6	91.8	81.4	373.6	96	76.4	52.8
ATCTCCATAACCGTGATCGA	Standard	YJL066C::chr10_2:dntag	2074.2	2094	2342.6	2528.2	3306.6	2244.6	2291	1932.6
ATCTCCGAACATGGGTTAAG	Standard	YDL213C::chr4_3:dntag	2276.4	1838	2390.4	2348.4	2751.8	2763.4	2235.2	2102
ATCTCCTCAACGCATAATGG	Standard	YDL214C::chr4_3:dntag	58	51	64	53.4	68.6	54.4	48.2	48.6
ATCTCGACACAAGCTAATCG	Standard	YJL064W::chr10_2:dntag	1060.6	762.6	907	886.2	2803.75	1252.4	960.2	918
ATCTCGCTAACCTCTGAGTA	Standard	YJL065C::chr10_2:dntag	1260.4	970.6	1335.6	1245.6	2473.2	1623.8	1166.4	868.4
ATCTCTACAACCGCTATGAG	Standard	YIL015W::chr9_1:uptag	105	92.2	90.6	99.2	130.5	106.8	65	58
ATCTCTGAAGAAGCCGACAC	Standard	YIL016W::chr9_1:uptag	1961	1618.4	2058	2029.2	3133	2348.4	693.8	915.4
ATCTCTTGAAATGTGTGGCC	Standard	YDR509W::chr4_8:dntag	731.2	729.2	656.6	602.4	1453.4	751.4	574.4	343.6
ATCTCTTTAACTATGCGGCC	Standard	YCR017C::chr3_1:uptag	2335.4	2172.2	3254.8	3196	4006.25	2087.6	1147.4	1356
ATCTGAACGCATGGGAACGT	Standard	YGR199W::chr7_5:dntag	2022.2	1998.6	2026.6	2184.75	2507	2149.4	1756.8	1801.8
ATCTGACAAGAATATCGGCG	Standard	YOR135C::chr15_2:dntag	997.6	1407.25	908.4	868.25	314.8	634.6	798	854.2
ATCTGACTAACGATGATGCC	Standard	YIL017C::chr9_1:uptag	81.2	94.8	108.75	112.4	198.6	158.6	60	56
ATCTGAGCACAACTAAGACG	Standard	YIL018W::chr9_1:uptag	61.8	60	59.8	67.8	94.8	63.8	48.2	43.2
ATCTGCCTAACCTGCGTAGA	Standard	YIL066C::chr9_1:uptag	2238.4	2300.6	2865.6	2659.6	3149.4	2405.4	1643.6	1724.4
ATCTGCTGACACACACTAAG	Standard	YIL067C::chr9_1:uptag	2471.2	2033	2290	2278.2	4492.4	1886.8	1206	1057
ATCTGGATAACCTGGGATAC	Standard	YER037W::chr00_11:uptag	52.2	48.25	55	54.4	64.4	58.6	46.8	42.2
ATCTGGCGAACAGGTGCATA	Standard	YGR200C::chr7_5:dntag	76.8	80	80	75.8	96.2	78.4	57.6	55.2
ATCTGGGAACCTCCATCAAG	Standard	YGL138C::chr7_2:uptag	1179.6	1128.4	1617.2	1623.4	3707.4	2322.8	664.2	752.8
ATCTGGTAAATAGGTACGC	Standard	YIL068C::chr9_1:uptag	77	66.4	71.6	67.2	99.4	86.6	61	57.2
ATCTGTATAGACAAACCGCG	Standard	YIL020C::chr9_1:dntag	75.6	79.8	869.4	372.8	81.4	76	51.6	48.6
ATCTGTCGAACCGCCGTAGA	Standard	YIL021W::chr9_1:dntag	116.4	115	91.25	87	338.2	98.25	75.2	54.8
ATCTGTGAACGCCCAGGAAC	Standard	YCR019W::chr3_1:uptag	298.4	315.25	392	420.2	638.8	295.4	188.8	158.6
ATCTGTGCAACCATAGTACC	Standard	YIL022W::chr9_1:dntag	64	59.8	56.8	66	90.2	62.4	52.4	45.4
ATCTTAATAACGTGTCCGCC	Standard	YIL023C::chr9_1:dntag	101	95.2	114.4	86.2	152	99.6	95	78.8
ATCTTACGAACGGCAAGTAC	Standard	YIL071C::chr9_1:dntag	1273.8	1491.4	1395.4	1435.8	2397.6	1091	1537.6	1582.6
ATCTTAGAACGCGCAGACAC	Standard	YIL072W::chr9_1:dntag	1908.8	2115	2025.8	2050	2760.8	1715.6	1456.8	1258.4
ATCTTCAACGAGTTAGACGC	Standard	YIL073C::chr9_1:dntag	3257.4	3344.75	3127.8	3210	4810	4447.8	2578	2831.4
ATCTTCCTAACGATCTGTCG	Standard	YIL074C::chr9_1:dntag	445.4	561	666.4	539	1182.8	973.4	439	464.4
ATCTTCGACCAGAACTGACG	Standard	YEL025C::chr5_2:dntag	286.8	243.6	126.4	133.6	339.8	122.4	110.6	134.4
ATCTTCTCACAAGCAGTACG	Standard	YEL026W::chr5_2:dntag	209.4	231	190.6	160.4	579.8	194.6	142.2	80.6
ATCTTTAACTCCGAATCCGG	Standard	YGR202C::chr7_5:dntag	1124	853.2	1344.6	1309.75	1660	1085.2	867.2	728.4
ATCTTTAGACAACTGTGCCG	Standard	YOR136W::chr15_2:dntag	70	77.4	73.6	76.6667	97.6	85.25	62	67.8
ATCTTTGAACCGTCTGGAAC	Standard	YCR020C::chr3_1:uptag	317	444	503.4	322	1219.4	1375.8	134	91
ATGAAACGGAGAGACCTGTC	Standard	YEL027W::chr5_2:dntag	73.4	73	77.4	68.4	101.333	80.8	55.8	52.6
ATGAAAGTAGTACAGCCCGC	Standard	YEL028W::chr5_2:dntag	251	291.8	217	190.8	641.8	248.6	175.6	103.4
ATGAAATGTTGGGAACGCCC	Standard	YGR203W::chr7_5:dntag	655.2	620.8	639.2	662.2	1431.4	934.2	753.6	752.2
ATGAACCCGTGCCAACGTAG	Standard	YOR137C::chr15_2:dntag	1554.2	1581.75	1498.6	1338.75	2751.5	1854.6	1286.2	1286.6
ATGAACCGATTCTAACGGAC	Standard	YOL153C::chr00_15:uptag	376.4	318	178	162.25	616.4	358.5	117.8	119.6
ATGAACCTCGATCAACCTGT	Standard	YGR205W::chr7_5:dntag	1939.8	1848	2073.5	2483.2	3587.4	1963.8	2058.4	2077
ATGAACGAACTTACACGCCT	Standard	YGR206W::chr7_5:dntag	259.2	206	276.6	261	588.6	390.4	151.2	116.8
ATGAACGCCATTACAACTCG	Standard	YOR138C::chr15_2:dntag	689	633.5	529.6	654	2310.8	1520.6	749.2	838.2
ATGAACGTAGAATACTCGGG	Standard	YGR207C::chr7_5:dntag	2406.6	2307.8	2520.2	2564.2	2499.8	2843.8	2097.2	1932.4
ATGAATAAGACAGCCTCCCG	Standard	YGR208W::chr7_5:dntag	237	253	192.2	180.6	651.2	232	154.6	90.2
ATGACAACTCGACACACGGG	Standard	YGR209C::chr7_5:dntag	1728.6	1463.2	2516.4	2385	2939.75	2334.6	1545.4	1573.8
ATGACAAGAGAAGCTCCTCG	Standard	YOR139C::chr15_2:dntag	157.4	121.8	165.6	136	220	163.6	95	106.4
ATGACCCAACCGTGCGAGAA	Standard	YGR210C::chr00_8:dntag	1566.2	1407.4	1569.8	1920.4	1834.4	1515.4	852	1157.2
ATGACGACAACTCACTACGG	Standard	YLL033W::chr12_1:uptag	76.6	96	78.2	76.6	94.5	82.2	56.8	54.6
ATGACGCAACGCGAATGACC	Standard	YLL034C::chr12_1:uptag	62.8	65.2	67	66.6	81.6	77.4	50.2	46
ATGACGCGAACCTACCTAGA	Standard	YLL035W::chr12_1:uptag	91.2	78	70.8	85	99	91.2	57.6	49.6
ATGACGGCAACCTCTCGATA	Standard	YLL036C::chr12_1:uptag	65	58.6	61	62.6	70.6	65	49.6	45.6
ATGACGTTAAGCGCGAAGAC	Standard	YLR018C::chr12_1:uptag	2463.8	2245.6	2045.8	2253.6	3315.4	2329.6	1126.4	1129.2
ATGACTAACGCCTATACACG	Standard	YLR019W::chr12_1:uptag	2689.2	2942	2761.5	2750	3035	3134.8	1222.8	1248.2
ATGACTCCAACGCCGTGAGA	Standard	YLR020C::chr12_1:uptag	1102.2	1011.6	1038.6	942	1546.25	977.8	655	441.6
ATGAGAACGGCAGATACCGC	Standard	YGR211W::chr7_5:dntag	74.4	69.6	68.25	76.2	109.6	90.2	58.6	55.4
ATGAGAAGGAGACCTCGCT	Standard	YLR033W::chr00_8:dntag	64.8	68.2	70.4	66.4	87.75	76.8	59	52.2
ATGAGAATAACTTAGCGGCC	Standard	YCR020C-A::chr3_1:uptag	80.2	87.6	91.8	90.4	154.8	112.8	61.2	56.8
ATGAGACAACTTCCAAGCCG	Standard	YDL215C::chr4_3:dntag	256.4	257.8	303.2	238	930	342.6	225.4	194.6
ATGAGCCTAACCTCTCTAGT	Standard	YLR021W::chr12_1:uptag	1394.6	1134.8	866.8	1058.2	1511	1019.4	488	455.6
ATGAGCTGAACCGTGATTAC	Standard	YLL041C::chr12_1:dntag	61.6	61.2	70.4	65.8	83.8	68.8	54.4	51.6
ATGAGGAACGACAGGACCCT	Standard	YLR034C::chr00_8:dntag	101	120.6	120.6	115.6	193.8	118.4	96	77.8
ATGAGGAGAACGTAGTATCC	Standard	YLL042C::chr12_1:dntag	1807.6	1448.4	1580.4	1782.33	2677.25	1850.6	1364.8	1262.4
ATGAGGGAACGCCGATCAAC	Standard	YCR021C::chr3_1:uptag	2947	2727.6	3003.6	2931.4	3352.8	3406.8	1516	1614.6
ATGAGGTAACGGAGCTACAC	Standard	YLL043W::chr12_1:dntag	332.2	257	247.75	256.4	212.2	110	261	374.8
ATGAGTAACGAATGATCGCG	Standard	YGR212W::chr7_5:dntag	1814	1523	1829.2	1576.6	2628.4	2929.4	1683.8	1656.4
ATGAGTGTAACGCCTCGACA	Standard	YLL044W::chr00_8:dntag	442.2	474.8	75.8	80.6	420.2	400	489	359.2
ATGATAACGTACACACCTGC	Standard	YGR213C::chr7_5:dntag	1762.6	1798.6	2067.2	1931.6	2237.6	1543.4	1365.2	1416
ATGATATTAACGGCTACGCC	Standard	YLR026C::chr12_1:dntag	58.2	66	64.4	58.8	86	66.6	49	47
ATGATCCCAAGACAAGTCCG	Standard	YGR214W::chr7_5:dntag	188.6	164.8	281.2	198.8	513.6	315	150.4	131.2
ATGATCCGAACGGCAGCACA	Standard	YNL051W::chr00_16b:uptag	170.2	180	163.8	144.2	494.2	169.6	110.2	65.6
ATGATCGGAACGGACAGATT	Standard	YGR215W::chr7_5:dntag	83.4	102.6	97.4	79	161.2	89.6	69	69.6
ATGATGATAACTACGTGCCC	Standard	YLR027C::chr12_1:dntag	70.8	77.4	73	70.8	90.2	75.8	59	51.8
ATGATGCTAACCTGTCACAC	Standard	YLR028C::chr12_1:dntag	57	62.6	63.4	60.4	88.75	70	46.6	45
ATGATGGTAACGGCACGTAA	Standard	YLR029C::chr12_1:dntag	78.4	70.6	73	72.2	92.2	92.2	57.6	53.6
ATGATTAACTAGACACCGCC	Standard	YOR336W::chr15_4:uptag	152.2	144.2	117.4	120.6	491	125.4	103.4	64.4
ATGATTATACATGCACCGCC	Standard	YCR022C::chr3_1:uptag	536.4	290.2	419.4	432.8	929.25	495.2	246.8	233.4
ATGATTATAGGATAGCCTCG	Standard	YJR123W::chr00_12:uptag	50.8	53	56.2	52.8	67.4	54.2	46.2	41.2
ATGATTGAACGCCTACGAAC	Standard	YOR337W::chr15_4:uptag	1921	1940.8	1476.4	1409.2	3075.8	2559	943.6	846.4
ATGCAAACACATTATCCGCG	Standard	YDL216C::chr4_3:dntag	3017.4	2746.8	3012.2	3269.6	5068	4378.5	2462	3049.4
ATGCAACCTCCCTAGAAGAT	Standard	YGR216C::chr7_5:dntag	52	55.4	56.6	53.2	67.6	55.6	43.2	44
ATGCAAGAAGACTATCGCCC	Standard	YGR217W::chr7_5:dntag	73.8	70.4	82.4	84.4	94.75	87.4	68.4	64.4
ATGCAAGTACAAGAGCGGTT	Standard	YLR035C::chr00_8:dntag	3350.6	3220.25	3219	3188.25	4824.4	3475	3122	3011.6
ATGCAATCACAACTGACTGG	Standard	YDL217C::chr4_3:dntag	77.8	67.2	72.4	83.8	99.25	69	56.4	51.4
ATGCAATGAACTCTAAGCCC	Standard	YDR510W::chr4_8:dntag	68.2	68.6	77.2	75.6	103.2	83.5	56.4	54.4
ATGCACAACTATCAAGCCTG	Standard	YDL218W::chr4_3:dntag	2268.6	2098.4	2391.2	2320.25	2316.8	2071.4	1654.6	1537
ATGCACACACCCAGAGAGGT	Standard	YLR036C::chr00_8:dntag	261.6	287.25	215.6	194.75	554.2	243.8	175.4	110.6
ATGCACCGAACGCCGAGTAA	Standard	YOR338W::chr15_4:uptag	593.8	495.2	431	524.4	1124.75	910.75	322.6	231.8
ATGCACTTAACGCTAGGTAC	Standard	YOR339C::chr15_4:uptag	3552.2	3882	3320.4	3418.2	4293	4644.8	2063.6	1616
ATGCAGTTAAGGCTAAGCAC	Standard	YCR023C::chr3_1:uptag	3993.8	4125.75	4570.4	4368.2	5290.2	4883.2	2070.8	2252
ATGCCAGCAACGCGCTAGAA	Standard	YDL227C::ctrl_54:uptag	1988.6	1841.4	1712.8	2288	2173.8	1693.6	1322.8	1131.6
ATGCCCAACGATAAGACCGT	Standard	YGR218W::chr7_5:dntag	95.4	91.2	90.4	87.8	147.8	97.8	61.4	56.4
ATGCCCACAACGGTCGAGAA	Standard	YNL146W::chr14_3:dntag	216.8	254.4	211.8	194	592	233.2	153	86.8
ATGCCCTTAACCGTCGTTGA	Standard	YNL145W::chr14_3:dntag	1931.8	1867.8	1835.8	1812	2462.2	2348.8	1274.4	1405.4
ATGCCGATACACAATAGCCG	Standard	YKL001C::chr11_1:uptag	1117.8	856.4	985.2	998.75	2037.8	1301.2	674.8	590
ATGCCGCAACATTGTCTAAC	Standard	YCL001W::chr3_1:dntag	2207.4	2134.4	2753.2	2890.2	4021	4405.8	2509.6	2324.4
ATGCCGGGAGCCGTTGACAA	Standard	YLR197W::chr12_3:uptag	94.6	78.4	102.4	113.4	192.6	116.6	81.6	77.8
ATGCCTATAACCTTCCGAGA	Standard	YNL144C::chr14_3:dntag	3179	2851	2966.2	3261.8	3822.4	3705.2	2307	2497.8
ATGCCTTTAACTCGGAAGAC	Standard	YCL002C::chr3_1:dntag	2891	2522.6	2594	3197.2	5361.2	3686.6	2371	2550.8
ATGCGAACGTAAGACAGCGT	Standard	YOR292C::chr15_4:dntag	2336.8	2140	1859.5	2137.8	2953	2315.4	1922.8	1733.8
ATGCGAATAACTATGACGCC	Standard	YOR293W::chr15_4:dntag	69	79.8	85.4	93.2	110.4	70.6	80	70.6
ATGCGACGAACGCGGATATA	Standard	YOR294W::chr15_4:dntag	69.8	64.2	66.6	68.4	84.2	74.6	52.8	50.6
ATGCGAGAACCTGGATTAAC	Standard	YCL003W::chr3_1:dntag	53.6	53.8	61.6	62	77	62.6	49.8	43.6
ATGCGCGTAACCTCGTACAA	Standard	YOR295W::chr15_4:dntag	66.6	69	74	73.4	93.2	79.4	53.8	53.2
ATGCGCTCAACCTGTACTAA	Standard	YOR343C::chr15_4:dntag	1906.2	1701.2	2185.8	2394.2	3633	3210.8	2362.6	2554.8
ATGCGGAACGATGGTTAATC	Standard	YCL004W::chr3_1:dntag	70.6	62.25	71.4	70	91.8	82	57.6	50.8
ATGCGGACAGACCAATACCG	Standard	YOR140W::chr15_2:dntag	532	450.2	482.8	560.8	1030	967	573.4	396
ATGCGGCTAACGCCTCACAA	Standard	YNL143C::chr14_3:dntag	569.4	457	541	694	1053.4	752	648.6	535
ATGCGGCTAACGCCTCATAA	Standard	YNL142W::chr00_17b:dntag	1872.8	1475.2	1801.8	2177.6	2941	2474.6	2135	1933.6
ATGCGGTTAAGCGGTAATAC	Standard	YOR344C::chr15_4:dntag	878.6	638.8	743	692.8	1542	1071	468	594.2
ATGCGTAACGAGTGGTAACT	Standard	YOR345C::chr15_4:dntag	3028	2722.6	2873.25	3139.8	4070.2	3818	2835.6	2819.2
ATGCGTTTAACTTACAGCCC	Standard	YCL005W::chr3_1:dntag	179.2	187.2	157.4	155.25	494	166.25	124.2	74.2
ATGCTAATAACTGATCGCCC	Standard	YCL006C::chr3_1/chr00_12:dntag	1811.4	1938.8	2190.2	2128.6	3866.8	2388	1726.8	1777.2
ATGCTACGAACTACCAATCG	Standard	YOR346W::chr15_4:dntag	2844.4	2911	2526.25	2862.5	5636.2	4310.25	2869.8	2975.8
ATGCTAGAACCCGTGGGAAC	Standard	YCL007C::chr3_1:dntag	58.8	57	62	66.5	77.8	63	48.2	47.4
[truncated: 9,922 more rows]
