# Supplementary material for: A Systems Biology Approach Reveals the Role of a Novel Methyltransferase in Response to Chemical Stress and Lipid Homeostasis
Source: PLoS Genet. 2011 Oct 20;7(10):e1002332. doi: 10.1371/journal.pgen.1002332 (PMC3197675; doi:10.1371/journal.pgen.1002332)
Supplement: Dataset S2 — Chemical SGA. Fitness profiling of crg1 double deletion mutants (crg1ΔxxxΔ) with cantharidin. (XLS) [file pgen.1002332.s002.xls]

## Sheet: Sheet1
probe	assignset	strain::batch:tag	crg1_drug_1	crg1_dmso_1	crg1_drug_2	crg1_dmso_2	crg1_drug_3	crg1_dmso_3	crg1_drug_4	crg1_dmso_4	crg1_drug_5
AAACAAACACCCGCGTGGTT	Standard	YDL227C::ctrl_1:uptag	5767.25	5655.75	4384.6	4515.6	4741.4	4348.6	4587	4585.2	2810.6
AAACAACGAACCCGCTGGTG	Standard	YDL171C::chr4_2:dntag	1027	1512	1526.2	1614.6	1570.6	1981.2	1957	1770.6	869
AAACACTGAAACCCGTCTGG	Standard	YDL172C::chr4_2:dntag	563.25	511.2	986.75	1160.2	912.4	944.4	725	978.6	327.8
AAACATGGAAACCCTGGGCC	Standard	YGR044C::chr7_4:dntag	1698.8	1563.2	2012.5	1747.4	1818.4	2387.8	2290	2466.6	1832.8
AAACCAGAAACCCTTGCGGG	Standard	YDL227C::ctrl_9:uptag	4178	3682	3584.2	3696.4	3612.8	3861	3769.4	3600.2	1954.8
AAACCGAAACACGCCGTTGG	Standard	YDL173W::chr4_2:dntag	611	642.2	905.75	665.4	548.8	902.2	840	719.4	352
AAACCGAGAAACCGGCCTGT	Standard	YDR223W::chr4_5:uptag	1558	1658	2549.2	2308.6	2067.2	2651.4	2644	2140.8	961.4
AAACCTGCAAACACTCGGGT	Standard	YDR224C::chr4_5:uptag	67.5	59.4	75.2	70.2	63	86.4	98.6	80.2	53
AAACGCGAAACAGCCTCGGT	Standard	YLR048W::chr12_2:uptag	327.6	182.6	639.2	434.6	272.4	712.4	557.6	522	178.8
AAACGTAAACACTGCGCCGG	Standard	YML115C::chr00_15:uptag	108.6	86	120.6	101.2	86.8	150.8	133.6	130.4	65
AAACGTAGAAACCGTGCGCC	Standard	YML114C::chr00_9:uptag	65.2	67.8	71.4	75.2	68.2	73	75	71.8	54.4
AAACTAGGAAACCGTCGTCC	Standard	YML113W::chr00_9:uptag	2996.75	2746.8	4677.8	4461	4315.4	4069.8	4017.6	3941.8	2303.6
AAACTCGTAAACACGTTCCG	Standard	YML056C::chr13_1b:uptag	226.2	212.2	284.2	337	317.8	343.6	308	288.8	216.8
AAACTCTAAACAGCTCTCG	Standard	YML055W::chr13_1b:uptag	899.6	997.75	1525.8	1924.4	1417.2	1784.4	1496.4	1579.4	422.4
AAACTGACAAACCGTTCCGG	Standard	YDL174C::chr4_2:dntag	1038.4	909.8	1758.6	1674.6	1335.4	1946.8	1861.6	1877	1104.6
AAACTTCAAACAGGTGCCCG	Standard	YGL085W::chr7_1:dntag	72.4	75.6	113.75	123.2	107.6	144.2	114.6	113.4	95.8
AAAGAAATACCCGGCCCTGG	Standard	YGR089W::chr00_14:uptag	2169	2162.6	2671.4	2006	1739	2541.2	2241.8	2154.8	1180
AAAGAACAACCCTCCGTGGG	Standard	YGL086W::chr7_1:dntag	1071.6	1254.6	1144.6	1315.2	1092.8	1387	871.8	1011	913.2
AAAGACAAACCCGCTTCGGT	Standard	YDL227C::ctrl_9:dntag	3098.2	2785.2	1610.5	1552.6	1541.6	1646.2	1553.2	1705.8	1346.6
AAAGACTAAACCTCCGCGTG	Standard	YML054C::chr13_1b:uptag	225.8	212.8	303.8	349.8	330.6	324.2	239.6	269	205.2
AAAGAGCGAAACCGTTGGCC	Standard	YDR528W::chr4_8:uptag	3450.25	3034.8	3539.8	4168.4	3602	3716.6	4541.2	4521.4	2028.4
AAAGAGTTAAACCTCGCTCC	Standard	YBR202W::chr2_4:dntag	54.6	50	63.4	62.8	60.4	75.6	62.6	65.8	49
AAAGATATAACCCTGTGCCC	Standard	YDL227C::ctrl_1:dntag	3693.8	3241.75	2972.6	2951.6	2963.4	2985.8	3251.4	3209.2	2251
AAAGATTTAACACGCCCGCG	Standard	YDL175C::chr4_2:dntag	343	441.75	867.75	947.6	539	997.2	932.25	886.4	384
AAAGCAACAACCGCCGTTTG	Standard	YGL087C::chr7_1:dntag	914	1207	1722.2	1627.4	1988.2	2033	1311	1410.6	711.8
AAAGCACGAAACCTCTGTCG	Standard	YMR003W::chr13_2:uptag	929.2	779.8	1132.25	1136.4	1098	1280.2	1127.8	1013.2	742.4
AAAGCCTTAAACATCCGTCG	Standard	YDL176W::chr4_2:dntag	1199.75	1286.2	2309.4	2203.4	1732.6	2523.2	2499	2744	1469.8
AAAGCTAAACAGTGCTCCCG	Standard	YDL177C::chr4_2:dntag	79.75	85.25	148	156.8	129.6	157.2	161.2	164.6	107.4
AAAGGAAGAACCGCGCCTCT	Standard	YDL227C::ctrl_2:uptag	6348.2	6274.8	5553	5674.2	5941.6	5647.5	5978.6	5838.2	2642
AAAGGACTAAACGCCGGTCG	Standard	YMR004W::chr00_9:uptag	1950.4	2207.4	1951.25	2680.6	2121.2	2369.4	2536.33	2157.2	1099.8
AAAGGCACAAACGGCCCTGT	Standard	YGL141W::chr7_2:dntag	1263.4	1588.4	1763.6	1602.2	1368.4	2012.8	959.6	1391.4	727
AAAGGCGTAAACATGCGGCC	Standard	YDL227C::ctrl_2:dntag	6916.75	6625	5454.4	5610.8	5813.4	5487.2	5677	5793.2	4452.6
AAAGGTGAAACATGGGTCCC	Standard	YGR007W::chr7_3:dntag	282.4	276.6	321	277.8	377.6	369.4	269.8	401.8	353.8
AAAGTATGAAACGCGCTTCC	Standard	YBR203W::chr2_4:dntag	1135.2	1293.2	1269.8	1697.4	1596	1842.6	2049.8	2198.4	1619.6
AAAGTCCGAAACATTCCTCG	Standard	YDL178W::chr4_2:dntag	1188.75	1162.6	2399.4	1951.4	1700.4	2202.6	2528.2	2389.2	1314.4
AAAGTGAGAAACGCTGCGCC	Standard	YBR204C::chr2_4:dntag	958	900.4	1654.8	1435.6	1326.6	1480.6	1788.8	1677.6	1001
AAAGTTCTAAACCACGTCCG	Standard	YER114C::chr00_5:dntag	723.25	718.6	1200.5	958.8	1024.6	1196.4	1346	1261	496.6
AAATAACTAACCGCCTGCGT	Standard	YLR049C::chr12_2:uptag	1879.2	1348.8	2554.8	2458.2	2411.6	2214.2	2432.8	2240	821
AAATACAAACGGGCCGCCTG	Standard	YGL088W::chr7_1:dntag	64.2	48.4	63	56.6	51.2	74.4	74	67.4	44.8
AAATACAGAACCGCCTTTCG	Standard	YDL179W::chr4_2:dntag	768	820.2	1027	1226.8	772	1223.4	967.8	1220.4	671.8
AAATACTCAAACGCTGGCCG	Standard	YDL180W::chr4_2:dntag	679.2	717.2	650	1202.6	1108.6	1104.2	1425.2	931.2	725.6
AAATAGACAACCGCTTCGCG	Standard	YER115C::chr00_5:dntag	1080.2	929	1448.6	1249.4	1058.6	1714.6	1441	1648	1071.4
AAATCACGAAACGCTCTTGC	Standard	YBR205W::chr2_4:dntag	839.4	939.2	1642	1548.4	1195	1509.6	1399.6	1111.2	971.4
AAATCAGCAAACGGGCTCCG	Standard	YDL227C::ctrl_3:uptag	2458.4	2214	1831.8	1999	2273.8	1949.4	1928.8	1907.2	853.2
AAATCCCAAACCACTGTGTG	Standard	YGL089C::chr7_1:dntag	1299.4	1189.4	1734	1563.4	1338.6	1839	1567	1699	965.4
AAATGAAGAACCGTCCGCCG	Standard	YDL181W::chr4_2:dntag	109	96.6	100.8	100.2	91.8	123	111	103.8	70
AAATGAGTAAACGGTCGGCC	Standard	YBR206W::chr2_4:dntag	313.4	384	627.8	590	427	779.2	762.8	569	515.8
AAATGCCGAAACCATCTCGT	Standard	YDR225W::chr4_5:uptag	74.75	72.8	97.6	79.2	74.4	121.2	98.2	99.2	69.4
AAATGTAAACCCGAGGCCCG	Standard	YGL090W::chr7_1:dntag	509	568.8	1001	880	1034.4	1211	708.2	982.4	433.8
AAATGTACCAAACTCCCGGT	Standard	YDR226W::chr4_5:uptag	54.2	50.8	55	57.8	52.6	59.8	62.6	55.4	45.8
AAATGTCTAAACCCGCAGCG	Standard	YDL227C::ctrl_3:dntag	2492.6	2925.8	1978.8	2198	2526.2	2402.6	1814	1951.2	1286.6
AAATTACCAAACGTCGTCCG	Standard	YMR122C::chr00_9:uptag	1322.8	1103.6	1526	1636.6	1848.8	1536.6	2059.2	1656	1476.6
AAATTCAGAAACGTCTCGCC	Standard	YBR207W::chr2_4:dntag	961	705.6	1340	1049	819.6	1274	1237.4	1248	772.4
AAATTCGACAAATCCCGCGT	Standard	YDR227W::chr4_5:uptag	51.6	50.8	56.6	51.6	52.6	62	55.6	57.2	42.8
AAATTCGCAAACCCATTCGG	Standard	YGR090W::chr7_4:uptag	43.4	40.4	52.4	48.6	43.4	70.25	63.6	56	42.6
AAATTGTCAAACCGAGCTGC	Standard	YDR529C::chr4_8:uptag	106.2	105.8	120	120.6	113	149.2	149	132.6	100
AACAAAGGAACCGGCTCTCG	Standard	YDL182W::chr4_2:dntag	1116.6	963.6	883.8	1341.6	1264.8	1048.2	1454.2	1472.4	1024.8
AACAAATTAACCGCGCTTCG	Standard	YDL183C::chr4_2:dntag	58	51.2	51.6	51.2	50	54.8	57.2	57	42.8
AACAACCCAAACGTCTAGTG	Standard	YDL184C::chr4_2:dntag	1602.2	1443.4	757.5	1949.8	2088.2	774	2320	2393	1549.4
AACAACGGAAACGGTGGTCC	Standard	YBR208C::chr2_4:dntag	280.4	327.8	576	516.6	517.6	679.6	454.8	538.4	534
AACAAGTCAAACGCCTTTCG	Standard	YDL185W::chr4_2:dntag	67	65.4	83	76.6	69	97.5	100	96.4	53.8
AACAATACAACCGTCGGCGG	Standard	YMR123W::chr00_9:uptag	564.6	625.2	677.2	899.2	908.2	1189.8	595.2	1022	477.6
AACAATCTAAACGTGCGTCC	Standard	YMR124W::chr00_9:uptag	1329.6	1472.6	2389.4	3151	2572.6	3035.6	2534.8	2493	1650
AACAATGAACGCTTCTCCG	Standard	YDL227C::ctrl_4:uptag	5397.2	4627.2	4031	4187.4	4156.4	4136.2	4290.2	4446.8	2438
AACACAAACATCTTGCCGGG	Standard	YGL091C::chr7_1:dntag	89.2	72.2	104	81.2	73.2	116	126.6	93	61.8
AACACACAAACTCCTGGGTG	Standard	YDL186W::chr4_2:dntag	1622.75	1480.5	2013.6	2037.2	1873.2	1777.8	2297.6	1854.2	1009.4
AACACCGTAAACCGGACGTG	Standard	YMR179W::chr13_4:uptag	1132.4	1488.4	1078	2281.2	1612.2	1535.2	1492	1997.8	626.4
AACACGTAACAACCTGCGGG	Standard	YMR180C::chr13_4:uptag	1818	2065.2	3005.6	3474.6	4048.4	3341.4	2322.8	2617.8	1231.6
AACACGTTAAACCCGATCTG	Standard	YMR181C::chr00_8:uptag	1965.6	2198.8	3016	2957	2908	3371.6	2251.6	2891	1895
AACACTCCAAACCGAGGGTG	Standard	YDL187C::chr4_2:dntag	1665.75	1596.8	2042.75	2517.6	2231.2	2488	2415.2	2630.4	1492.8
AACAGAGTAAACTGCCCTCG	Standard	YMR182C::chr13_4:uptag	959.8	1215.6	1618.4	1325.6	1387.8	1820.8	1684.8	1082.2	442.4
AACAGCCCAACCGGATGGT	Standard	YGL142C::chr7_2:dntag	278	175	532.5	347.6	249.2	576.2	437.4	425.2	161.2
AACAGGTAACAACGCTTCCG	Standard	YMR150C::chr13_4:dntag	68	69.2	78	81.6	89.6	81.8	79.6	85.8	57
AACAGTAGAAACTCGTCCCG	Standard	YMR152W::chr13_4:dntag	1868.8	1741	2423.8	2545.6	2585.8	2393.2	2184.2	1945.2	1663.6
AACAGTTAAGAACCTCTCGC	Standard	YMR153W::chr13_4:dntag	872.6	1134.2	1331.4	1585.2	1403.6	1494.4	1247	1648.6	990.8
AACATAGCAAACTCTCTCGG	Standard	YMR153C-A::chr13_4:dntag	1056.6	1122	1717.5	1613.4	1491.4	1801.8	1270	1849.8	1455.6
AACATCTCAAACGACGTGCG	Standard	YMR210W::chr13_4:dntag	2012.4	1857.6	3015.6	2888	2512.8	2718.8	2600.8	2592.4	1869.6
AACATGGTAAACGACTCCC	Standard	YMR211W::chr13_4:dntag	48.8	51	52.8	51.6	51.4	55.4	52	59.2	43.8
AACATTATACAAGCCCGGCG	Standard	YDL188C::chr4_2:dntag	337.6	245	450.4	449.2	310.4	662.8	409	473.2	186.6
AACCAACATAGAGCCCTGG	Standard	YGR119C::chr7_4:dntag	238	122.2	423.4	259.8	162.6	502	377	376.4	123.8
AACCAAGTAAACTCTCGTCG	Standard	YMR213W::chr13_4:dntag	77.2	70.6	77	87.8	79.2	87.4	98.6	85.8	64.4
AACCACATAAACTCGTCTGG	Standard	YAL028W::chr1_1:uptag	2065.4	2437.6	2448.8	2699.4	2198.6	2977.4	2637	2697.4	1336.6
AACCACCAACAACTGTGTGT	Standard	YLR050C::chr00_8:uptag	2448.4	2370.8	2706.4	2792.4	3121.2	2798.4	3028.4	3241.6	1791.6
AACCAGGGAAACGAGTCCGT	Standard	YLR051C::chr12_2:uptag	59.8	55.6	67	61.2	64.8	72.2	71	71.2	47.8
AACCAGTTAAACGATCCCGG	Standard	YDL189W::chr4_2:dntag	710.4	678.5	697.5	679.2	584.2	792.6	756.5	868.6	457.8
AACCATCTAAACGACTGTGC	Standard	YAL027W::chr1_1:uptag	3061.8	3396.6	3535.4	4021.2	4395.8	4458.8	4059.2	4511.4	2425.2
AACCATTTAACAACTGCCGG	Standard	YGL092W::chr7_1:dntag	109.6	75.8	202.4	130	78.2	270.2	198.8	190.2	77.4
AACCCAAGAAAGCCGGTCGT	Standard	YDR228C::chr4_5:uptag	104.75	85.4	177	139.6	93	219.6	201.6	169.2	88.2
AACCCGCGAAACCAAGGTGT	Standard	YDR229W::chr4_5:uptag	1349.75	1393	1866.33	1912.2	1937.2	2027	2077.4	2344.8	888
AACCGAGTAAACGTACCGCG	Standard	YAL026C::chr1_1:uptag	791.75	618	1214.8	1038	1113.4	1747.2	1180.2	987.8	611.2
AACCGCGCAAACGAAGCTGT	Standard	YLR052W::chr00_8:uptag	52.2	55	71.4	64	58.8	75.6	64.4	68.4	54.6
AACCGGAAAGAACGCTCCTG	Standard	YDL190C::chr4_2:dntag	1565.2	1231.2	943.2	1591.2	1030	1801.5	1650	1534.6	755.2
AACCGTCTAAACCATACGTG	Standard	YER022W::chr5_3:dntag	52.2	59.8	66.4	64.6	58.6	69	67.4	69	49.8
AACCTAGAACAAGCCGCGTT	Standard	YLR053C::chr12_2:uptag	818	725.4	925	919.6	890	1145.4	959.6	1010.8	297
AACCTCAAAGAACGGCCTGT	Standard	YDR230W::chr4_5:uptag	95.8	87.6	133.5	121.8	99	172.4	148.8	138	68.4
AACCTGCTAAACCTTAACGG	Standard	YDL191W::chr4_3:uptag	1238.8	2412.8	1821.2	2510.6	2237.8	2307.2	2113.2	3152	603.4
AACCTGGCAAACCGTAGACG	Standard	YER023W::chr5_3:dntag	69.8	72.6	94.75	90.8	81.6	95	90.2	96.2	77.6
AACCTGTGAAACCTACCAGT	Standard	YLR054C::chr12_2:uptag	2032.2	2086.8	3383.5	3350.2	3182.8	3682.6	3163.4	3236.2	1317
AACCTTAGAAACGCACCGGG	Standard	YDL192W::chr4_3:uptag	470.8	653.4	223	480.4	184.6	333.2	307	450	281.8
AACGAAAGAACGTGCCGGTC	Standard	YER024W::chr5_3:dntag	390.5	457	586	591	777.2	720	637	600.4	443.2
AACGAACCAAACTGGCGCGT	Standard	YLR055C::chr12_2:uptag	868.6	1092.8	881.4	1250.8	783.4	1562.8	507.4	1241.2	450
AACGACTAACAACTGTCCGT	Standard	YER025W::chr5_3:dntag	70.75	64.2	66.6	70.2	59.8	76.2	69	70.8	55.2
AACGACTTAAACGGAGCCCG	Standard	YER077C::chr00_8:dntag	68.5	54.6	62.4	62.2	66.2	75.4	73.2	66.4	53.2
AACGAGCGAAACGCATCCGT	Standard	YER078C::chr00_8:dntag	958.8	988.8	1666	1531.8	1208.2	1670.6	1697.8	1924.4	1643.4
AACGATCTAAACCGTATCCG	Standard	YER079W::chr5_3:dntag	1616.4	1561.2	2835.6	2513.6	2438.4	2834.6	3014.2	3072.2	1911.6
AACGATGCAAACGATCCTCG	Standard	YER080W::chr5_3:dntag	356.2	257.6	424.2	402.8	263.2	424.6	449.4	486	405.6
AACGCAGAACAAGCTCCGGT	Standard	YLR056W::chr12_2:uptag	95	119.8	140.75	124	87.2	226.4	173.2	173.8	72.8
AACGCAGGAAACGCAGGTCT	Standard	YLR057W::chr12_2:uptag	308.4	362.6	809.75	613.4	667.6	734.8	907	598.8	191
AACGCCCTAAACGAGACGGT	Standard	YHL011C::chr00_10:uptag	71.6	68	81.4	78.6	71.8	93.4	82.8	86	59.8
AACGCCGCAAACCTGAGAGT	Standard	YLR058C::chr12_2:uptag	822.2	854.2	1497.25	1420.8	976.4	1417.8	1019.8	1354.2	621
AACGCGAGAAACCATTTGCC	Standard	YDR530C::chr4_8:uptag	3972.2	3322.6	3854	3243.6	2719.4	4069.8	4384.4	4284.4	2046.2
AACGCGCAACAAATCTCGGG	Standard	YDL193W::chr4_3:uptag	74.6	60	101.4	75.2	69.2	95.2	122.75	88.4	50.2
AACGCGGTAAACCTGTACGA	Standard	YHL010C::chr8_1:uptag	1981.25	1906.6	2188	1749.4	1270.6	1819	1623.2	1390.6	941
AACGCTATAAACCCGGTACG	Standard	YHL009C::chr8_1:uptag	1494	1363.8	1466.8	1909.4	1930.4	1644.6	1198.75	1620.6	930.2
AACGGAACAAGACCCGCTGT	Standard	YGR051C::chr7_4:dntag	2120	2122.6	1674.75	1986.6	2672.6	1667.8	2201.75	2311.4	1825
AACGGAAGAAACTTGCGCCC	Standard	YDR531W::chr4_8:uptag	60	55.4	60.6	59.2	58.2	60.2	69	61.6	48.6
AACGGCACAAACTGACCTGG	Standard	YDL194W::chr00_16b:uptag	125.25	124.8	104.25	129	103.2	135.4	147	178.8	70.2
AACGGCGTAAACCTTCACAG	Standard	YHL008C::chr8_1:uptag	749.4	667.6	1072.2	967.2	853.6	1160.6	971	885.8	345
AACGGCTAACAAATTCGCCT	Standard	YDR231C::chr4_5:uptag	52.2	47.6	55.8	54.2	52.6	57.2	61.8	57.8	49.6
AACGGGATAAACCGATTCCG	Standard	YDL195W::chr4_3:uptag	57.6	53	55.2	57.6	54.6	58	65.6	61.8	47.8
AACGGGTGAAACCAATCCCT	Standard	YGL143C::chr7_2:dntag	62.6	62.2	65.2	73.8	64	77.4	82.6	71.4	48.6
AACGGTGAACAAATGGTCCC	Standard	YDR532C::chr4_8:uptag	95.4	97.8	124.2	115.8	96.8	148.4	183.2	123.4	104
AACGGTGGAAACCTGAGTAC	Standard	YHL043W::chr8_1:dntag	1099.2	1136.8	1037.2	1001.8	1301.6	1311.4	1206.6	1286.4	751.6
AACGTAGAACAAGGGCGCTC	Standard	YHL042W::chr8_1:dntag	1148.5	1114.8	1498.6	1652	1707.8	1804.2	1427.6	1482.6	1039.2
AACGTATGAAACCTCGACCG	Standard	YHL041W::chr8_1:dntag	1230.4	883.75	1670.8	1207	1823.6	1328.8	1323.2	1120	711.4
AACGTCCTAAACGCAAGCGG	Standard	YHL040C::chr8_1:dntag	796.6	927.2	1063.2	1197.8	915.6	866.4	760	924	882.6
AACGTCTAACAACACGCGGG	Standard	YHR020W::chr8_1:dntag	95.4	84.4	148.8	113.8	98.6	188.2	142.2	142.2	69.2
AACGTGACAAACCTACTCGG	Standard	YHR021C::chr8_1:dntag	606.2	308	402.4	576.8	704.8	485.2	312	624.6	190
AACGTGTTAAACGGGAACCC	Standard	YBR209W::chr2_4:dntag	1636.2	1573.8	2167.4	1894.6	1358.2	2319.2	1946.6	1905	2608.4
AACTACAGAAACTTCGCTCG	Standard	YHR022C::chr8_1:dntag	92.2	86	108.4	115.6	106.2	107.8	102.2	102.6	67.6
AACTACGGAAACCGCGCAGT	Standard	YGR052W::chr7_4:dntag	654.8	521.4	1225.4	905	873.4	1411.8	1128.6	1039.8	772
AACTACGTCAAAGCACCGGG	Standard	YPL252C::chr16_1:uptag	99	92.8	194.2	148.8	101.8	217	182.8	179.8	70.4
AACTAGAAAGACGGCGCGTT	Standard	YPL250C::chr16_1:uptag	1482.6	1809	2117.6	2045	2034.8	2784.2	2221.6	2678.2	1089.6
AACTAGACAAACTTGCCTCG	Standard	YPL249C::chr16_1:uptag	2187.6	1997.6	4253.8	4920.4	4534.6	5437.2	4174.4	5234.4	1875
AACTATCGAAACCGCCAGGG	Standard	YDL196W::chr4_3:uptag	263.5	165.2	519.25	352.6	207.8	584.8	506.2	462.6	157.6
AACTATTAACAAGGTGGCCC	Standard	YDR533C::chr4_8:uptag	123.75	112	176.2	162.2	143	159.6	194.6	164.2	96.8
AACTCAAACACCATGTCGCG	Standard	YGR057C::chr7_4:dntag	71.2	64.8	98.2	86.6	70.6	104.2	106.4	98.4	71.6
AACTCAATAAAGCGCCCTGG	Standard	YDL227C::ctrl_4:dntag	3383.4	2794	2029.8	2194.6	2101	2194.2	2036	2281.8	2090.8
AACTCACAACAAGGTTCCGG	Standard	YDL197C::chr4_3:uptag	105.2	91.6	146.2	144.4	100.6	174.4	154.5	141.4	76.8
AACTCACGAAACTAGCGTCG	Standard	YPL192C::chr16_1:uptag	2314.5	2412	2867.8	2808.2	2725.6	3163.4	3309.2	2981.8	2241.8
AACTCATGCAAAGACCTTCG	Standard	YDL198C::chr4_3:uptag	57	55.6	80	60	60.2	84.4	78	78.2	52.8
AACTCCGAACAACAGCGGGT	Standard	YLR059C::chr12_2:uptag	337.2	183.2	581	409	239.2	643.8	559.8	498.8	172
AACTCGAAAGAAGCCTCCGG	Standard	YDL199C::chr4_3:uptag	1749.4	1553	1480.6	1599.2	1647.6	1590.5	2065.4	1836.6	909
AACTCGACAAACTATGCGCG	Standard	YPL191C::chr16_1:uptag	52	58.75	60.4	59	54	69.8	65.4	66.4	43.8
AACTCTTCAAACATACGGCC	Standard	YPL190C::chr16_1:uptag	87.2	76.2	113.2	105.2	68.8	150.2	133.2	138.4	70.4
AACTGATAACAAGTCGTCCC	Standard	YPL229W::chr16_1:dntag	1617.4	1487.6	1644	1801.2	1776.4	1785.4	2016	1932.4	1372
AACTGATCCAAAGACGGGCC	Standard	YDR534C::chr4_8:uptag	2866.8	3476.8	4088.67	3315.8	3438.6	4220.8	4317.2	4073.2	1764.8
AACTGGCAACAACATGCGCG	Standard	YDL200C::chr4_3:uptag	890.4	717	984.2	1000.8	1155.6	1513.75	1532.2	1301	621.8
AACTGGTCAAACGAAGTCCC	Standard	YBR210W::chr2_4:dntag	1695	1737.4	4018.2	3703.6	2904.2	3468.2	3061.8	3388.2	2818.6
AACTGTGCAAACACCACGTT	Standard	YLR060W::chr12_2:uptag	75.2	68.2	85.8	84	77.2	97.8	112.8	85.6	61.6
AACTGTTTAACCCAAAGCCG	Standard	YGL093W::chr7_1:dntag	279.4	148.8	551.5	359.8	200	630.6	463.2	486	165.6
AACTTACGAAACTACCGCG	Standard	YPL228W::chr16_1:dntag	57.5	59.8	64.8	69.6	64.4	69.4	69.2	66.2	51.6
AACTTAGCAAACTTAGCGCC	Standard	YBR211C::chr2_4:dntag	67.4	72.8	78.2	75.8	74.8	87.8	84	81.6	70.8
AACTTATACCAAAGCCGCTG	Standard	YDL201W::chr4_3:uptag	455.6	355.8	746.5	625.4	506.8	906.6	696	709.8	315.4
AACTTCGTAAACAGACGCCG	Standard	YPL227C::chr16_1:dntag	597	678.4	989	1201.6	846.8	1540.2	982.8	1346.8	517.8
AACTTTCGACAACGACACGG	Standard	YNL322C::chr14_1:uptag	197.2	251.25	352.2	357.6	267.6	411	280.6	371.6	263.6
AAGAAATTAATCTCCTCCGG	Standard	YGL094C::chr7_1:dntag	1406	1144.6	1168	1126.6	756.8	1311.2	1507.8	1761.4	1324.4
AAGAAGTAAAGCGCCGCCCT	Standard	YDR232W::chr4_5:uptag	102.5	80.25	110.8	108.8	97.6	137	147.2	118.6	68.4
AAGAATGCAAAGCCGTCCCG	Standard	YGL095C::chr7_1:dntag	133.6	106.4	280.4	186.8	137	341.75	282.2	298	98.4
AAGACACAAAGCGGCGCGTT	Standard	YLR061W::chr12_2:uptag	130	104.4	160.8	138.8	130.6	200.8	176.4	154	84
AAGACACTAAACTCTGCTCG	Standard	YNL321W::chr14_1:uptag	2848	3000.75	3268.8	3410.4	3407.4	3098.8	2879.4	2865.6	1760.2
AAGACAGTAAAGCCGGTTCC	Standard	YBR212W::chr2_4:dntag	1318	1260.8	1886.4	1915.2	1742.8	2255.2	2156	2249	1625.4
AAGACCTAACAAGTGTGCCG	Standard	YNL320W::chr14_1:uptag	1349	1360.2	2066.4	1881.2	1770.2	2077.6	1781.4	1759.8	615
AAGACGGCAAACGCATCTCG	Standard	YNL263C::chr14_1:uptag	60.6	54.8	72.25	71.2	60.4	87	71.25	76.2	52.4
AAGACTTGAAACGCGACTCC	Standard	YNL262W::chr14_1:uptag	50.6	52.4	60.2	58.2	55	62.8	59.6	57.8	47.6
AAGAGAAACGGAGCGCCCTT	Standard	YGR053C::chr00_14:dntag	1206.4	1096.2	1877	1322.8	1680	1572.4	1564	1388.2	874.2
AAGAGACCAAAGCCTGCTCG	Standard	YDL202W::chr4_3:uptag	330.75	203.6	614.8	437.2	300.2	706.8	585.2	558.2	192
AAGAGCCTAAACGCTACGCG	Standard	YNL261W::chr14_1:uptag	77.2	69.8	88	83	85.4	88	98	80.4	64.6
AAGAGGATAAAGTGGTCTCC	Standard	YBR213W::chr2_4:dntag	1187.8	1348	1754.2	1430.2	1228.2	2127.2	1658.2	2215.6	1655.4
AAGAGGGAACAAGTTGCCTT	Standard	YGL144C::chr7_2:dntag	2241.4	2121	2263.2	2487.6	1957.4	3190	2740.2	3023	2403.4
AAGAGGTGAAACGCCTATCC	Standard	YBR214W::chr2_4:dntag	292.6	241.2	642.2	1054.8	935	677.6	764	954.6	144.8
AAGAGTGTAAACTGACTGCC	Standard	YNL260C::chr00_8:uptag	58.8	50	55.8	62.8	58.4	61.6	58	59.2	47.4
AAGAGTTCAAAGACGGTGCC	Standard	YBR215W::chr2_4:dntag	313.25	309.4	495.4	536.4	468.4	592.2	515.4	561.2	249.4
AAGATAACAATCGTGCCCGC	Standard	YBR216C::chr2_4:dntag	73.4	72.6	124.6	121.4	104.6	132.8	116.2	130.4	70.2
AAGATCCGAAACTACGTTCC	Standard	YNL307C::chr14_1:dntag	58.6	59.4	64.8	64.2	64.2	71	66.2	66.6	49.2
AAGATCGCAAACTATTGGCC	Standard	YDR437W::chr4_8:dntag	81.8	80	78.6	83.2	79.8	92.8	99.2	93.4	62.4
AAGATCGGATACGCTGGCCT	Standard	YHR006W::chr00_10:dntag	1839.8	1635.4	1719.4	2152.6	2120.2	1838.2	1854.6	2166.6	1494.8
AAGATGCAACAATGCCGCCG	Standard	YGL096W::chr7_1:dntag	639.6	792.4	1181	1100.2	858.6	1371	1134.6	1130.2	632.2
AAGATTCCAAACTCATTCGG	Standard	YGL097W::chr7_1/chr00_17a:dntag	49.2	50.6	50.6	46.4	43	56	55.6	49.8	39.4
AAGCAACGAAAGCGCGTGTC	Standard	YNL306W::chr14_1:dntag	90.8	76.4	101	95.4	75	107	103	104.6	61.8
AAGCAAGCAAAGGCCGCGTT	Standard	YGL145W::chr7_2:dntag	99.4	87.8	212.6	144	109.2	299	212.8	182.4	74.4
AAGCACATAAAGCTCTCTCG	Standard	YNL305C::chr14_1:dntag	62.4	56.8	84	75.6	62.6	86.6	78	77.8	58
AAGCACCTAAACGTACTTCG	Standard	YNL304W::chr14_1:dntag	2635.6	1897	3265.4	3206	3145	3083.6	2857	2729.6	2075.6
AAGCCAAACCAATGCCGGTG	Standard	YGR091W::chr7_4:uptag	283.6	179	519.4	347.6	221.8	625.4	440.6	427.8	150.4
AAGCCAATAAAGGCCCGTCG	Standard	YGL098W::chr7_2:uptag	104.2	86.4	179	127.2	97.4	247	178.8	177.8	76.8
AAGCCAGAACAATCTTTCCG	Standard	YGL099W::chr7_2:uptag	126	83	211.6	174	111.4	306.75	204.4	198	85.2
AAGCCAGCAAACTGTACTCG	Standard	YJL196C::chr10_1:uptag	199.6	143	361.75	240	180	444	280.75	314.8	128
AAGCCCACAAACGTATCTGG	Standard	YDL203C::chr4_3:uptag	917.6	998.8	1192.4	1373.8	1048.6	1662	1535	1845.6	844.2
AAGCCGCAACAACGACTGGT	Standard	YLR062C::chr12_2:uptag	502.6	673.4	746.25	913.8	675.4	1136.2	750.2	1036.2	286.4
AAGCCGTGAAACGACACCGT	Standard	YJL194W::chr10_1:uptag	82	77.4	83	83.2	81.4	82.4	95.4	82.4	60
AAGCGAAGAAAGGCTCCCTC	Standard	YDR438W::chr4_8:dntag	3001.4	2780.2	3141	4154.2	3826.2	3655	4148	4184.4	3439.8
AAGCGACGAAACTTACGTGC	Standard	YJL195C::chr10_1:uptag	54	50.4	57.8	59.4	57	62.2	60.5	72.4	49.2
AAGCGCGAACAACCAGTCGT	Standard	YJL193W::chr10_1:uptag	342	252	538.6	475.8	411.6	595.6	425	485.4	230.4
AAGCGCGTAAACCGTGATAC	Standard	YJL144W::chr10_1:uptag	2548.25	1970	3610	3316.8	2634.6	3365.6	3250.4	3469.6	1904.8
AAGCGGGCAAACGATATGCT	Standard	YDR233C::chr4_5:uptag	2016.4	1821	2572.2	2797.2	3108.8	3196.8	3235.8	3160	1112.4
AAGCGTAGAAACTGGAGCCC	Standard	YBR217W::chr2_4:dntag	2417	2601.2	3525.4	3202.6	2076.4	3200.8	3524.8	3951.6	2801.6
AAGCGTCAACAACACCGTTT	Standard	YGR054W::chr7_4:dntag	70	72.6	85.25	78.4	68.4	105.6	97.2	100.2	61.4
AAGCGTCTAAACGGGAGATC	Standard	YJL143W::chr10_1:uptag	71.2	63.8	82.4	73.2	69.2	82.8	83.75	77.8	55.6
AAGCTAAGAAAGTCCCGCGC	Standard	YBR218C::chr2_4:dntag	1412	1445.8	2589.5	2331.4	2167.8	2682.8	2611.75	2065.2	2027.6
AAGCTCCGAAACGGCACAGT	Standard	YLR063W::chr12_2:uptag	252.8	144.4	459.6	321.2	188.4	538.8	403.8	398.2	145
AAGCTCTAACAACTACGGCG	Standard	YJL142C::chr10_1:uptag	555.4	663.6	1023.6	898	988.2	970.6	834.6	646.8	404.2
AAGCTGGGAAACGCACACCT	Standard	YDR234W::chr4_5:uptag	215.6	165	175	243.6	233.2	193.2	186.4	190	162.4
AAGCTGTCAAACGATCAGGC	Standard	YBR219C::chr2_4:dntag	356.6	292.4	680.75	580.2	412	600.2	396.2	485	499.2
AAGCTTACAGAAGGTGAGAT	Standard	YLR062C::chr12_2:dntag	148.4	232.4	280.4	388.6	284	485.8	328.6	361.6	145.6
AAGGACAAAGAGCGCGTCTC	Standard	YJL141C::chr00_14:uptag	844	606.8	1087.4	851.8	698.6	868	840.4	626.4	679.8
AAGGACAGAAAGGGCTTCCC	Standard	YGR008C::chr7_3:dntag	108.2	92.6	110.25	124.2	101.4	147.75	131.4	121.8	77.8
AAGGAGTGAAACTTAGGTAC	Standard	YBR220C::chr2_4:dntag	1744.8	1243.4	1771.8	1961.2	1816.4	2164.6	1755.6	2129.2	1630.6
AAGGATGAACAATTTGGCCC	Standard	YGR045C::chr7_4:dntag	1246	1169.6	1499.8	1648.6	1235.8	1664.8	1509.2	1712.6	1107
AAGGATGCAAACTGCGAGCC	Standard	YDR439W::chr4_8:dntag	144.2	168.75	164.2	163.8	140.4	179.2	142.8	152.2	136
AAGGATTAACACACGCCCGG	Standard	YDL204W::chr4_3:uptag	505.2	531.4	999.8	880.2	806	1088.25	836.6	917	354.8
AAGGCCCAACAACCTAGTGT	Standard	YDR235W::chr4_5:uptag	96.4	77.2	158.8	121.8	90.2	204.6	128.2	145	59
AAGGCGGCAAACGGTTACAC	Standard	YBR221C::chr2_4:dntag	883.2	728.2	836.2	1379.2	1277.4	1103.8	929	1373.6	687.6
AAGGGACTAAAGAGCTGTCT	Standard	YLR064W::chr12_2:uptag	62.4	61.2	70	72.8	64.4	75	73.25	86	52.4
AAGGGAGCAAACTTTATCCG	Standard	YGL101W::chr7_2:uptag	45.4	46.4	51.8	46.6	46.2	53.6	51	52.6	43.6
AAGGGCACAAAGATCCCGCT	Standard	YGL146C::chr7_2:dntag	2097	2004.4	2871.2	2844.8	1922.6	3055.2	2352.4	2830.2	2245
AAGGGCCGAAACGTAACGCT	Standard	YLR065C::chr12_2:uptag	52.4	50	60.8	57.2	56.2	65.6	62.2	61.2	45.2
AAGGGTCTAAACGTCACACC	Standard	YJL189W::chr10_1:dntag	71	57.4	79.2	76.8	61.2	86.4	87.6	79	57.8
AAGGTAAACTTAACCCGCCG	Standard	YDL205C::chr4_3:uptag	69.2	60.4	72.6	78.6	61	91.2	92.8	80.4	54.2
AAGGTACGAAAGACTCTGCC	Standard	YJL188C::chr10_1:dntag	55	51.4	62	65	59.6	67.8	71.2	57.6	51
AAGGTCCCAAACGCTAGACG	Standard	YJL187C::chr10_1:dntag	1927.2	2078.2	2282	2525.4	2400.4	2356.6	2509.75	2326.4	1799.2
AAGGTCGTAAACGTCGAGAC	Standard	YJL138C::chr10_1:dntag	1194.8	1081.6	977.4	1098	756.2	1647.6	702.6	1093.4	732.6
AAGGTTCAAAGAGACCGCC	Standard	YDR455C::chr4_8:dntag	463.5	699.4	362.4	400.8	615.2	475.2	569	682	632.2
AAGTACCGAAAGACCTGTCC	Standard	YJL136C::chr00_14:dntag	687.4	863	1066.6	1487.2	1020.6	1028	1500.4	829.6	914
AAGTACGAACACACCTCGGT	Standard	YJL135W::chr10_1:dntag	2786.5	2910.6	3423.4	3590.4	3328.4	3731.4	3778	3643	2928.4
AAGTATCAACACACTGTCCG	Standard	YJL086C::chr10_2:uptag	82.4	72.5	109.4	94.6	78.4	130	116.6	103.8	73.2
AAGTATGTAAAGAGGTGCCC	Standard	YBR222C::chr2_4:dntag	237.4	285.2	517.8	597.6	519.6	648.8	599	498	441
AAGTATTTAACATCCCGGCC	Standard	YDR440W::chr4_8:dntag	1310.8	1144.2	1545	1315.4	1089	1209.8	1682.8	1683.4	1054.8
AAGTCACAACACAGCGCGTG	Standard	YJL084C::chr10_2:uptag	375	239.4	687.2	539	384.6	788.6	667.8	624.6	236.6
AAGTCATTAAAGATGCGCCC	Standard	YDR441C::chr4_8:dntag	1176.4	1177.25	1322	1419.2	1519.6	1795.4	1441.25	1750.2	1043.8
AAGTCCCAACAAGAGGGCCT	Standard	YGL147C::chr7_2:dntag	195.6	151	344.5	295.2	216	463.6	300.2	342.2	216.8
AAGTCCGTAAACTCGAACCG	Standard	YJL083W::chr10_2:uptag	4007.6	3627.2	2167	3180.8	3934.2	1404.8	4289.2	3414	2335.8
AAGTCCTGAAACGGGAGTAC	Standard	YJL082W::chr10_2:uptag	2520.2	2790.2	2523.8	3056	2503.6	3537	3351.4	3498.4	1823.8
AAGTCGATAAACTGGTACGC	Standard	YJL032W::chr10_2:uptag	62.5	69	81.4	81.2	75	89.4	87.4	79.6	66.4
AAGTCTAGCAAATACCTCGC	Standard	YJL031C::chr10_2:uptag	51.2	50.4	61.4	60.4	58.6	61.2	59.2	62.6	49
AAGTCTATAAAGATCGGCTC	Standard	YBR223C::chr2_4:dntag	600.2	518.8	871.6	1124	940.4	888	1089.4	1076.4	1128.8
AAGTCTGGAAACGTGACGAC	Standard	YJL030W::chr10_2:uptag	4271	3798.6	4904.8	5089.4	5428	5105.2	5436.2	4749.4	3181.2
AAGTCTTTAACAGGCAAGCC	Standard	YDR442W::chr4_8:dntag	89.4	80.4	129.75	100.8	86.6	136	116.2	107.4	67.8
AAGTGAAACCAGAGCCCGCT	Standard	YDR236C::chr4_5:uptag	296	201.6	560.2	374.8	266	623.8	523	494.6	170.8
AAGTGGCAACAAGCAGGCTC	Standard	YDR443C::chr4_8:dntag	247.4	165.4	481.25	350	220.6	559.2	433.4	422	163.2
AAGTGGTCAAACTACGACGC	Standard	YJL078C::chr00_15:dntag	2357	1726.75	2052.2	2001.6	2370.8	1631.4	2282.2	1780	1514.8
AAGTGTCCAAACTAGACGCC	Standard	YJL077C::chr10_2:dntag	2062.2	1993.4	2544.4	2221	2328.8	1967.4	2144.2	2096.4	1299
AAGTGTGTAAAGACAGCGCC	Standard	YJL076W::chr10_2:dntag	168.75	97.25	248.6	183.2	104	344.2	217.4	252.6	85.2
AAGTTATTAAAGGACCCGCC	Standard	YDR446W::chr4_8:dntag	1208.5	1110.2	1197.25	895.4	1012.4	1129.8	1008.4	1217.8	882
AAGTTCAGAAAGATGTCCGC	Standard	YBR224W::chr2_4:dntag	205.8	251	300	296	316.2	391.8	273.8	302.4	161.2
AAGTTCGCAAACGTGTAGAC	Standard	YJL075C::chr10_2:dntag	77.6667	73	81	92.2	85	85.8	85.4	79.6	63.4
AAGTTCGTAAAGACACCCC	Standard	YIL004C::chr9_1:uptag	55.8	49.4	58	59.2	53	58.4	62	58	44.8
AAGTTGATAAAGCACTCCCG	Standard	YDL206W::chr4_3:uptag	53	50.4	58.5	58.2	51.2	73.8	68.2	66.2	47
AAGTTGTAACACCAAGCCCG	Standard	YDL207W::chr4_3:uptag	301.75	171.25	553.8	381.2	250.2	681.8	494.4	524.6	162.2
AAGTTTAACCACAACCTGGC	Standard	YGR055W::chr7_4:dntag	412.6	454.8	728.75	627.6	419	946.4	593.25	738	279
AAGTTTACAAAGCACGCGCC	Standard	YBR225W::chr2_4:dntag	295	357.2	438.6	645.6	327.4	790.4	556	682.8	311.8
AAGTTTCAACAAGCCATCCG	Standard	YGL102C::chr7_2:uptag	256.6	155	522	397.6	228.4	669	512.6	518.6	160.8
AAGTTTGGAAAGACACCTCC	Standard	YDR447C::chr4_8:dntag	853	734.4	958.75	1173.4	1016	1000	1232	1319.8	1045.4
AATAACATAACGCCCTGTCG	Standard	YIL005W::chr9_1:uptag	90.8	80.2	110.4	104.6	85.2	135.6	127.6	123.8	65.6
AATAAGCGAAAGCCTGGGCC	Standard	YGR009C::chr7_3:dntag	149.6	102	341.5	207.4	132.4	376	270.2	299.8	114.4
AATAAGTCAAAGCGTCTCCC	Standard	YBR226C::chr2_4:dntag	388.8	570	917.2	1247	674.2	1355.8	865.6	1414.6	518.4
AATAATTGAAAGCGGGCGTC	Standard	YDR448W::chr4_8:dntag	89.8	102	148.667	158.2	115	183.8	199.8	163	80.4
AATACAAACCGCACCGTGGG	Standard	YDL208W::chr4_3:uptag	116.75	111.4	149.25	122.8	102.4	175.8	153.8	145.2	76.8
AATACAAGAACGGCGCGTCC	Standard	YIL006W::chr9_1:uptag	836.6	1119	1310	1549	1466.6	1511.6	1182.8	1150.2	595.8
AATACACAAAGCTCGGTCC	Standard	YIL007C::chr9_1:uptag	174.4	204	269.4	252.6	197.4	305	305.8	293.8	204.4
AATACAGCAAAGGCGTGCCC	Standard	YDR449C::chr4_8:dntag	235	142.4	458.8	308.6	192.6	521.6	380	365.6	141.8
AATACCCTAAACTCCGAGGT	Standard	YLR066W::chr12_2:uptag	59	57.2	64	68.8	56.6	74.4	75.6	71.2	45.4
AATACGATAAAGGGTTCGCC	Standard	YBR227C::chr2_4:dntag	2104.8	1544.8	2235.4	2695.8	2020.2	2465.4	2001.4	2308.6	1527.4
AATACGCGAAACTCCAGTCG	Standard	YIL055C::chr9_1:uptag	426	422.4	473.6	852.8	618.8	643	590.8	618.8	408.2
AATACGGTAAACTCGGGACC	Standard	YIL056W::chr9_1:uptag	4132.8	4050.8	4668	4613.4	4753.4	4506.4	5114.2	4358.2	2628.8
AATAGACAAAGTCCTCCCGG	Standard	YDL209C::chr4_3:uptag	57	54.8	62	53	51	63.4	56.4	53.2	43.4
AATAGACTAAAGCGTGTGCC	Standard	YIL057C::chr9_1:uptag	1113	1089	1540.8	1594	1361.8	1656.2	1852.4	1666.4	733.2
AATAGAGGAAAGGTGCTCCC	Standard	YDR450W::chr4_8:dntag	75.25	67.8	62.5	79.4	72.6	70.2	67.6	70.8	57.8
AATAGATCAAAGGCTCTGCC	Standard	YDR451C::chr4_8:dntag	1232	974.8	1694.75	1387.8	1532.6	1265.6	1288.2	1265	739.6
AATAGCGTAAACTCTGACCC	Standard	YIL010W::chr9_1:dntag	1866	2007.2	3565.4	3798.6	3358.6	3628.8	3243.6	3172.2	2082.4
AATAGGTACACATGCTCCC	Standard	YBR228W::chr2_4:dntag	178.6	208.2	690.6	589.8	522.6	624.2	637.6	594.4	270.6
AATAGTATAAAGTCGCGCCC	Standard	YIL011W::chr9_1:dntag	1192.8	1083.8	2139.2	1738.6	1668.4	2026.8	1630.6	1976.8	1258.6
AATAGTCGAAACTGCTAGGC	Standard	YIL012W::chr9_1:dntag	2330.6	2119.4	1854.8	1828.8	1973.8	2015.2	1714	1864.2	1425.8
AATAGTTGAACGGACCTCCC	Standard	YDR452W::chr4_8:dntag	280.4	237.6	175.8	297.4	178.4	341.8	281.75	442.2	280.8
AATATGCAACACATTGGCCG	Standard	YGL103W::chr7_2:uptag	71	66.8	110.75	79.8	71.6	177.4	146.2	101	63.2
AATATGGTAAAGCATCCCGC	Standard	YDR453C::chr4_8:dntag	647.4	452.4	978.75	823.6	701.2	933.8	949.2	1090	1065.6
AATCACTTAAAGCAGGGCCG	Standard	YGL104C::chr7_2:uptag	535.4	581.2	741.4	745.8	765.6	1090	778	851.8	309.6
AATCAGCCAAAGATGTGGGC	Standard	YGR010W::chr7_3:dntag	542.8	410	940.75	810.8	617	1113	868.6	898.8	452.8
AATCAGCCATAATGAGGTC	Standard	YPR183W::chr16_5:uptag	243.2	174.8	455.8	310	226.2	514.8	400.4	387	137.8
AATCAGGGAAAGATCCTTCG	Standard	YGL105W::chr7_2:uptag	355.2	138	48	44.6	43	49.8	45	46.8	39.2
AATCATACAAAGTGTGCCGC	Standard	YBR229C::chr2_4:dntag	871.8	1221.8	1533.6	1942	1712.2	1736	1698.6	1818.6	798.2
AATCATCACAAAGTTCGCC	Standard	YGR056W::chr7_4:dntag	67.6	68.6	88.4	85.4	72.6	105	93.4	85	68.8
AATCATTTAACATGGCGGCC	Standard	YGR011W::chr7_3/chr00_12:dntag	51.6	53.4	60.6667	67.4	59.6	66.4	75.8	72	51.6
AATCCAAGAAAGTTGCCGCC	Standard	YGR012W::chr7_3:dntag	761.6	784.8	1005.2	706.6	849	1320.2	645.8	830.8	150.2
AATCCCATAAAGCAGTTCCG	Standard	YGL107C::chr7_2:uptag	62.4	51	82	75	60	109.25	108.8	90.6	48.4
AATCCCGCAAACTACAGTGG	Standard	YDL210W::chr4_3:uptag	187.8	193.75	311.25	442.8	344.8	403.4	460	348.2	146.6
AATCCCTAACAAGCGACGGG	Standard	YDL211C::chr4_3:uptag	230.8	228.4	415.333	370.4	241.4	495.8	419.6	454.2	300.6
AATCCCTGAAACTAGACTCG	Standard	YIL060W::chr9_1:dntag	2632	2946	3825	3247	3043.6	4243	3388.8	3503.4	2118.8
AATCGCCCAAACTAATTCGG	Standard	YGL108C::chr7_2:uptag	115	114.8	225.6	238.6	209.6	320.2	298.4	338	71.4
AATCGGCTAAACTATACCCG	Standard	YIL061C::chr9_1:dntag	55.2	60.2	67.2	67.8	61.4	78.2	73	70.6	50.8
AATCGGTGAAACGGTCAGAC	Standard	YIL062C::chr9_1:dntag	135.6	141.4	210.8	162.2	126.2	206.4	253	166.6	115.8
AATCTATCAAAGCGACGGCC	Standard	YBR230C::chr2_4:dntag	250.2	149.8	507.8	348	199.2	564.6	434.8	433.8	168.6
AATCTCATAAAGCCCACGGG	Standard	YGL109W::chr7_2:uptag	352.4	253.8	670.8	618.2	459.4	875.8	658	710.2	229.4
AATCTCCAACAAGACTTCGG	Standard	YDL212W::chr4_3:uptag	95.2	82	133.4	100.4	79.2	164.4	117.8	117.6	61.8
AATCTCCTGACTGGCAGAC	Standard	YBR231C::chr2_4:dntag	56.2	61.4	64.6	65.2	58.6	78.8	75.4	74.8	50.2
AATGAACTAAAGTCCGGTCC	Standard	YBR232C::chr00_8:dntag	1367.2	1396.6	2322.6	2263.6	1962.6	2075	2241	2565.6	1337.8
AATGAAGCAAAGTGCCCTGC	Standard	YGR013W::chr7_3:dntag	54.4	64.4	75.2	72.2	59.2	71	70.6	69.4	51.2
AATGACATAAAGTGCTGCCC	Standard	YDR454C::chr4_8:dntag	67	66.2	75.4	81.4	81.2	82.75	83	81.2	58.4
AATGACGGAAAGATTCGTGC	Standard	YBR233W::chr2_4:dntag	1579.8	1561.4	1865.6	2502.4	2543.6	2183.6	2689	2533.2	1935.4
AATGAGTAACACCCGACCGT	Standard	YIL063C::chr9_1:dntag	102.4	99.8	136.2	125.8	110.2	128.8	153.8	137	75.8
AATGCAGCAAAGATTCTCCC	Standard	YGR014W::chr7_3:dntag	1814.6	1622.8	2133.5	2295.4	2184.2	1994.8	2189.4	2393.6	2032.8
AATGCCCTAAACTATCACGG	Standard	YDL213C::chr4_3:uptag	70.8	63	78.4	73.6	67.8	101	96.4	96.2	57.6
AATGCGCCACAAAGCGAGTG	Standard	YDL214C::chr4_3:uptag	349.75	201.4	653.8	436.2	302.8	731	633.8	576.8	185.8
AATGCGCGAAACGGCGATAC	Standard	YEL016C::chr5_2:dntag	1033.6	1112.6	1506.8	1475.2	1323	1654	1601	1894.4	1288.4
AATGCGTCAAACTGGATACC	Standard	YBR234C::chr2_4:dntag	59	58.8	66.2	64.8	58	79	69.8	70	51.6
AATGGAAGAAATCCTCCCTC	Standard	YGR015C::chr7_3:dntag	1059.4	760.4	1742.8	1589.2	1187.2	2435	1285.4	1705	934.4
AATGGCGTAAACTGATAGCC	Standard	YBR235W::chr2_4:dntag	1702.75	1427.6	2501	2838.8	2271.8	3118.4	3011	3073	1897.4
AATGGCTGAAACTGTCTCAC	Standard	YBR236C::chr2_4:dntag	63.4	56.2	58.2	65.4	63.4	69	69.8	64	48.8
AATGGGAAAGCAATCGCCCG	Standard	YGR092W::chr00_14:uptag	920.6	287	1301.6	479	1009	642.4	1383.6	732	664.2
AATGGGAGAAAGCCGACTCT	Standard	YDR237W::chr4_5:uptag	74.2	79.2	77	75.2	62.4	103.25	87.8	85.2	49.4
AATGGTGCAAACTGGTGACA	Standard	YLR172C::chr12_3:uptag	637.2	824	1063.6	1589.8	1460	1516.6	1543.8	1424.2	553.6
AATGTCACAAAGCCATCTCG	Standard	YDL215C::chr4_3:uptag	484.5	447.4	804.6	667.6	470.4	956.6	759.2	740.6	317.6
AATGTGCCAAAGACCCAGCG	Standard	YGL110C::chr7_2:uptag	378.6	229	699.4	511.8	331	817.8	646.2	615.8	231
AATGTGGCAAACTGTCGAGA	Standard	YNL097C::chr00_16b:uptag	2046.2	3441	2079.25	2878.2	2288.6	3728.6	2359.6	3267.6	1629.8
AATGTTCGACAAGTAACGCG	Standard	YEL017C-A::chr5_2:dntag	2116.6	1946.2	2133.8	2573.2	2015.8	2419.2	2996.4	2855.4	2279
AATGTTGAACCAAATGCCCG	Standard	YGR093W::chr00_14:uptag	506	395.6	1125	995.6	705.2	1179.6	936.2	1000	326.6
AATGTTGTAAAGAGCAGCCC	Standard	YDR456W::chr4_8:dntag	236	133.8	420.5	282	186.8	485.8	370.6	402	128
AATTAAATAACTCGCCGCCG	Standard	YDL217C::chr4_3:uptag	137	132.2	174.2	154.4	137.4	194	204	182.6	89.4
AATTAACCAAAGTGCCTGCC	Standard	YGR016W::chr7_3:dntag	2224.8	2162	2232.8	2551.8	2340	2804.2	2444.8	2554.6	2022.8
AATTACCTAAAGCGCACTCG	Standard	YEL063C::chr5_2:dntag	66.4	76.2	74.4	71.4	65.8	101.8	111.8	120.6	183
AATTACGGAAAGCGAGTTCG	Standard	YEL064C::chr5_2:dntag	101.2	94.6	96.6	92.4	105.6	121.6	98.4	93.2	72.2
AATTACTAACACCGACTGCG	Standard	YEL065W::chr5_2:dntag	599.2	467.2	836.8	416.6	461.4	800.6	381	560.6	259.4
AATTAGGTAAAGCTCGACCC	Standard	YBR237W::chr2_4:dntag	117.8	117.6	109.4	125.4	103.4	122.8	130.2	125.4	95
AATTATAGAAATCGCGGCCC	Standard	YDR457W::chr4_8:dntag	56.75	48.6	63.75	54.8	52.4	62.6	75.2	62.2	43
AATTCAGTAAAGGACGTGCC	Standard	YBR238C::chr2_4:dntag	1068.4	1186.25	2233.75	1895.4	1945.8	2274	2134.8	2128.8	1436.4
AATTCATGCAACACCGCAGG	Standard	YGR058W::chr7_4:dntag	572.6	609.8	854.6	736.4	728.8	1104.8	766.2	892.2	438.6
AATTCGCTAAAGACCGACCG	Standard	YEL066W::chr5_2:dntag	797.6	749.6	1490.4	1378	1311.4	1150.2	1186.4	1335.2	684.8
AATTCTCAACAATGACCCGG	Standard	YGL111W::chr7_2:uptag	43	39.4	51.6	49.8	40.8	56.25	57.6	51.4	38.4
AATTCTCCAAAGAGCACGCG	Standard	YDL218W::chr4_3:uptag	762.2	728.4	1183	1082.2	1203.2	1358.4	1080	1224.2	458.6
AATTGAGAACACCGATGCCG	Standard	YDL219W::chr4_3:uptag	1771.8	2028	2551.4	3054.4	2288	2817.75	2980.4	2519.8	752.4
AATTGCTTAAAGAGGGACCC	Standard	YGR017W::chr7_3:dntag	1898.8	1857.6	2552	2306	2138.2	2441.6	2978.4	2613	1779.4
AATTGGACAAAGGACTCTCC	Standard	YDR458C::chr4_8:dntag	57	62.6	62.5	62.4	62.6	75	69.4	64.2	53
AATTGTCGAAAGACCATGCC	Standard	YDR459C::chr4_8:dntag	1330.6	1304.4	1723.6	1801.4	1970	2048.8	1734.6	1694.2	1326
AATTTAGGAAAGCTGCACCC	Standard	YGR018C::chr7_3/chr00_12:dntag	1941.8	1850.4	3052.2	2836.2	2464.4	3155.8	3106.8	3384.4	2099.4
AATTTGACAACAGAGCCTCC	Standard	YDR460W::chr4_8:dntag	298.4	186.6	562.5	387.6	248.8	651.4	506.4	514.8	169.6
AATTTGCTAAAGCGAAGCCC	Standard	YGR019W::chr7_3:dntag	2184.6	2128.8	3439.5	3092.4	2842.6	3473.2	3112.6	2948.2	2028.4
ACAAACCGAAAGGCGTGGCT	Standard	YDR238C::chr4_5:uptag	89	77	87.2	90.6	88.75	103	103.8	97.8	64.2
ACAAACTAAAGGTCGTCCCG	Standard	YLL021W::chr12_1:uptag	83.2	83.4	93.4	99.2	82.6	109.2	110.2	100.2	67
ACAAAGAGAACGGCCCTCGT	Standard	YLR067C::chr12_2:uptag	90	81.2	103	108.4	84.8	125.6	119.8	107.8	67.2
ACAAAGCCAAAGGGTCGGTC	Standard	YDR461W::chr00_17a:dntag	119.4	107.4	195.6	133.8	107.2	217	190.6	150.4	106.6
ACAACACAAATGGCGCGGCT	Standard	YDR239C::chr4_5:uptag	2970.5	3353.25	3491	4251.6	3203.2	4061.2	4414	3665.6	1664.2
ACAACCTAACACCATTTGGG	Standard	YGL112C::chr7_2:uptag	53.2	54.4	66.25	55.6	50.4	75.2	79.8	73.4	46.2
ACAACGCAACACCGGAGGTT	Standard	YLR068W::chr12_2:uptag	222	152	432.4	282.8	200.8	479	384.4	367.2	136.8
ACAACTACAAATCCTTGCGG	Standard	YDL220C::chr4_3:uptag	70.4	61.5	70	68.2	62	81.8	96.25	87.4	56.2
ACAACTCTAAATACGGCTCG	Standard	YLL023C::chr12_1:uptag	118	95	140.8	120.25	103.2	144.2	147.8	131.2	107.6
ACAAGAAGAACGTCTCCGCG	Standard	YLL024C::chr12_1:uptag	396.8	381.2	477.2	455.5	447.2	534.8	353.4	445.2	261.2
ACAAGACCAAATCGGCGTCG	Standard	YLR006C::chr12_1:uptag	1079	1074.2	914.8	1061.2	943	1177	925.2	1100.6	659.2
ACAAGCGAACACCCGTTAGG	Standard	YGR059W::chr7_4:dntag	2090.8	1712.6	2140	2226.6	1678.2	2739.6	1360.2	1976.8	1859.2
ACAAGCGCAAATACTGCCGG	Standard	YDL221W::chr4_3:uptag	75	78.6	99.8	90.4	80.8	128.2	116.8	107.2	56.4
ACAAGTCAACACCGCGAGGT	Standard	YLR007W::chr12_1:uptag	72	62.6	100.4	77.2	75.2	103.8	114.6	89.4	52
ACAATAACACCTATGCGGGT	Standard	YGR060W::chr7_4:dntag	93	89.8	115.2	98.4	88.2	129.8	129.75	123	69
ACAATACCAAATGCGCCGGG	Standard	YGL113W::chr7_2:uptag	209.6	127	375.5	218.8	146.2	400.8	294	301.2	116.8
ACAATCAAAGTACCGGCCTG	Standard	YGR061C::chr7_4:dntag	2613.8	2519.25	2699.2	2912	2387.4	2799.2	3172.2	2930.2	1808.2
ACAATCATAAATCGTCGGCC	Standard	YBR239C::chr2_4:dntag	521.8	566.25	575.2	632	615.6	682	769.2	735.2	661.4
ACAATCGTTGAGAATCGGAT	Standard	YNL021W::chr14_4:dntag	1620.6	2459.75	1427.6	2608.2	1830.8	2620.6	1751	2927.4	1105.8
ACAATCTAACACGACCTGGT	Standard	YLR008C::chr12_1:uptag	51.75	61	70.4	69.6	60	86	72.4	71.2	47.8
ACAATCTGAAATGCGCGGC	Standard	YBR240C::chr2_4:dntag	803.6	505.8	736.6	612	705.6	625.8	664	551	589.4
ACAATGGAACACCGCGCATG	Standard	YDL222C::chr4_3:uptag	483.6	495.75	1106.5	776	723	1173.4	808.8	810.8	352.6
ACAATGGTAAATAGCGTCCC	Standard	YBR241C::chr2_4:dntag	1671.4	1885.4	2879	2358.4	2005.8	2672.2	2896.8	2755.8	2122.8
ACAATTCGACAGAACCGTGG	Standard	YLR009W::chr12_1:uptag	269.5	161.8	482	336	243.6	567	455.6	449.8	167.4
ACAATTTCAAAGCCTGACCG	Standard	YGL114W::chr7_2:uptag	1305.4	1266.6	1472.2	1212.2	1050.8	1336.75	1208	1383.4	763
ACACAAACACCTACTGGTTG	Standard	YGR062C::chr7_4:dntag	77.4	73.4	88	90.8	90	102.2	91.6	97.8	63.6
ACACAAAGAAGTTTCCCTCG	Standard	YDL223C::chr4_3:uptag	738.4	640.4	1393.75	1543.2	1046	1585.4	1574.2	1651.8	780.2
ACACACACAACACGGGTTTG	Standard	YGR063C::chr00_14:dntag	124.4	114.8	230.2	174.4	136.6	274.6	213.6	192.4	121.8
ACACACTCAAAGCATTTCGG	Standard	YDL224C::chr4_3:uptag	2659	2987.4	4270.2	3834.8	3948.8	4102.4	4354	3834.8	1837.6
ACACAGTAACACATTGTCGC	Standard	YLL029W::chr12_1:dntag	144.8	127	227.8	156.8	158.8	227.6	216.8	211.5	120.6
ACACATATAAATCTCGCGGC	Standard	YLL030C::chr00_8:dntag	58.4	56.8	66.2	62	57.6	72.6	65	65.6	51.4
ACACATCGAAAGGACTGTCG	Standard	YLL031C::chr12_1:dntag	71.75	69.4	78.8	80.2	73.6	88.4	88.6	84	61.2
ACACCACGAAAGGAGTCGCT	Standard	YLL032C::chr12_1:dntag	813.2	828	1405.4	1360.2	1262.6	1595.2	1514.6	1317	764.6
ACACCATAACACGAGGGCGT	Standard	YLR014C::chr12_1:dntag	661.6	627.2	588.6	582	468.8	651.2	573.8	597.6	230.6
ACACCATTAAAGGTACGCGC	Standard	YLR015W::chr12_1:dntag	452.2	878.4	630	881.8	416.4	1213.2	643.8	894.8	291.8
ACACCCGCAAAGACGTAGGT	Standard	YLR016C::chr12_1:dntag	3915	3750	3575.4	4151	4520	4431.6	3668.4	4535.2	3375.4
ACACCGAAATAACTCTCGTG	Standard	YLR017W::chr12_1:dntag	2235.6	1930.2	2516.4	2748.2	2871.4	2882.6	2228.8	2643.2	1932
ACACCGTCAAAGAGCCAGGT	Standard	YLR069C::chr12_2:uptag	161.8	113.8	334.4	221.6	169.4	346	332.6	263.4	92.8
ACACCTCTAAAGATCAGCGG	Standard	YOR324C::chr15_4:uptag	1054.4	1243.4	2048	2175.8	2124	2310.8	1617.8	2135.2	848
ACACCTTAACAATGCACGGG	Standard	YDL225W::chr4_3:uptag	91.4	72.4	133.5	103.4	96.8	144	151.6	114.2	66.6
ACACGAAACACGATCCGGGT	Standard	YGR064W::chr7_4:dntag	120.5	130.2	125.4	116.2	101	137.2	134.8	129.6	78.2
ACACGAACACAATCCGGGTG	Standard	YOR325W::chr15_4:uptag	2007	2284.4	2543.6	1910.8	1970.6	2457	2594.6	2284.8	1052
ACACGACCAAAGGATCTTCG	Standard	YOR326W::chr15_4:uptag	79	77.4	99.2	82.4	78.6	113.2	98.6	106.4	59
ACACGAGAACACGAGTCCTG	Standard	YOR327C::chr15_4:uptag	403	480	596.4	543.6	623	674	658	824.2	277.2
ACACGATTAAAGCCATTGCC	Standard	YDR462W::chr4_8:dntag	194.25	115.6	386.4	250	156.2	486.8	383.8	373.6	123.2
ACACGCCAACAATGAGTCGG	Standard	YOR375C::chr15_4:uptag	596.5	737.2	816	878.4	681.2	1240	604.6	1036.2	903.8
ACACGCTGAAAGAGTACGCC	Standard	YOR376W::chr15_4:uptag	205.6	200.4	400.6	468.4	545	510.6	505	542.4	95.6
ACACGGCTAAAGACTCTACG	Standard	YOR377W::chr15_4:uptag	2546	2606.4	3087	3050.2	3574.4	3637	3503	3261.4	1583.6
ACACGGGAACAATCACTCGG	Standard	YOR378W::chr15_4:uptag	4176.75	3480.4	4509.8	4454.4	3189.4	4694.8	4586.4	4419.8	1957.6
ACACGTAGAAAGGCTAGGCC	Standard	YOR331C::chr15_4:dntag	65.6	65	80.25	78	66.4	86.2	102.25	78.2	52.4
ACACTAATAAATGCGCGTCC	Standard	YOR332W::chr15_4:dntag	65	59	73.2	65.4	58.6	78	69.2	68	54
ACACTAGAACACCGTACTGT	Standard	YOR333C::chr15_4:dntag	2507.5	2289	2468.4	2635.6	2059	2760.8	3217.4	2987.6	2117.2
ACACTAGCAAAGGGACTTCC	Standard	YBR242W::chr2_4:dntag	856	719.8	1248.6	1154.8	884.2	1285	1321.6	1629	1276.4
ACACTATTAAAGCTGCTCCG	Standard	YOR334W::chr15_4:dntag	118	141.4	257.5	182.6	188.2	223.6	217.8	176	111
ACACTCGAACAATGATGCCG	Standard	YOR047C::chr15_1:uptag	4225.4	3751.2	3986.8	4533.6	4694.4	4293.8	4659.8	4667.2	1981.4
ACACTCTGAAAGACGCGACG	Standard	YOR048C::chr15_1:uptag	80.75	73.8	82	91.2	92.4	95.6	92.4	95.25	59.4
ACACTGCGAAAGATACGTCC	Standard	YOR049C::chr15_1:uptag	350.25	324.2	581.4	391.4	341.2	473.8	549.2	506.2	245.2
ACACTTATACACACACGGTG	Standard	YOR050C::chr15_1:uptag	640	703.4	842.4	1193.4	986.8	883.8	822.8	712.25	410.2
ACACTTCAACAATCGTAGCG	Standard	YOR003W::chr15_1:dntag	65.6	57.8	80.2	68.6	71.2	90.8	72	75	57.6
ACACTTCCAAAGATACTGCG	Standard	YOR004W::chr15_1:dntag	77.2	69.8	92.8	78.4	73.8	87	100.6	93.6	70.8
ACAGAAATAACTTTGGCGCG	Standard	YDL226C::chr4_3:uptag	2117	2050	3352.8	3312.2	2898.8	4109.8	2839.2	4001.2	1399.4
ACAGAACTAAATCGGGTCCC	Standard	YBR243C::chr2_4:dntag	101.4	90.75	145.8	137.8	105.6	155	163.4	164.4	95.4
ACAGACCCAAAGGATTGTCC	Standard	YDR463W::chr4_8:dntag	445.5	291.4	410.2	306	211.6	575.6	482.6	634	469.6
ACAGACTAACACGCACTGGG	Standard	YOR005C::chr15_1:dntag	658	779.6	1073	1849.25	1834.8	1442.6	1196.75	1341.4	543.8
ACAGAGAGAATGCGTCGCC	Standard	YOR006C::chr15_1:dntag	107	98.2	143.5	137.2	126.6	161.8	170.8	149.8	125.4
ACAGAGCAACACGTACCGTT	Standard	YOR054C::chr15_1:dntag	489.2	479	517.4	600.2	458.4	541.6	716.8	524.8	336
ACAGATAAAGTACCTCCCGG	Standard	YGR065C::chr7_4:dntag	62.6	55.2	61	62.2	59.8	75.2	65.8	66.2	48.6
ACAGATACAAATGTCGCCCG	Standard	YOR055W::chr15_1:dntag	2203.8	2007.8	3002.6	2583.6	3333.8	2942.8	2900.4	2341.4	1892.8
ACAGATATACAGTTATGGCG	Standard	YJR067C::chr00_12:uptag	78.4	79.6	79.8	84.75	81	105	82.5	79.8	65
ACAGATGGAAAGGCAGTTCT	Standard	YDR240C::chr4_5:uptag	68.25	62.2	79.8	72	74.75	80.8	82.4	82	56.4
ACAGATTTAACCCACACGGG	Standard	YDL227C::chr4_3:uptag	1954.2	1994.8	1741.4	1881	1744.8	2059.8	1511.8	1746	1368.2
ACAGCAACAAGTCGAGCCGT	Standard	YOR056C::chr15_1:dntag	275	172.8	510.8	385.6	247.4	585.8	471.2	445.8	173.6
ACAGCATAACACCTGACGGG	Standard	YOR057W::chr15_1:dntag	150	119.5	218.75	167.4	120.2	262.2	187.8	188.6	95
ACAGCGGGAAAGAGCTATCC	Standard	YBR244W::chr2_4:dntag	507.6	476	1068.75	914.8	754.8	932.8	981.8	907.6	554
ACAGCTAAATAAGCCTCCGT	Standard	YLR070C::chr12_2:uptag	2622.2	2547.4	2837	3021.4	2741.8	3015.4	3356.4	3205.4	1224.4
ACAGCTAGAAAGGTGACGCC	Standard	YHR057C::chr8_2:uptag	135.2	132.6	255.75	265.8	230.8	306.4	217	200	123
ACAGCTTTAACATGAACCCG	Standard	YDL229W::chr4_3:uptag	1361.2	965	1810.67	1559.8	1436.2	1908.4	1941.4	1898.8	351.4
ACAGGAACAGAACTCCCTTT	Standard	YGR066C::chr7_4:dntag	1993	2417.4	3459.2	3642	3174	3672.75	3286.2	3543.6	2128
ACAGGAGTAAAGTACGCCCG	Standard	YHR105W::chr8_2:uptag	1354.8	1391.2	2227.8	2523.75	2674.2	2757.2	1937	2228.6	816.8
ACAGGCCCAAAGCACTAGGT	Standard	YDR241W::chr4_5:uptag	490.6	518.75	748.8	764	500.4	844.2	668.6	876.6	311.4
ACAGGCGAACAATGTACCCG	Standard	YHR106W::chr8_2:uptag	1349.5	1183.6	2106.5	1781.2	1649.4	1474.6	1701.8	1800	574
ACAGGCGGAAAGATATTCT	Standard	YLR071C::chr12_2:uptag	57.8	60.8	63	63	60.6	70	68.75	64.2	48.2
ACAGGTATAAAGGTAGTGCC	Standard	YHR107C::chr8_2:uptag	60.4	53.4	72	76.6	66.8	62	66.25	68.8	49.8
ACAGGTCAACACAAGTCCGT	Standard	YHR108W::chr8_2:uptag	648	731.2	972.8	861.4	805.2	1124.8	679.2	938.4	346.2
ACAGGTCGAAAGATGACTCC	Standard	YHR061C::chr8_2:dntag	656.2	604	1271.4	1605.6	1294.8	1390.8	1274.2	1265.4	789.4
ACAGTAAACACGCGACCGTT	Standard	YGR067C::chr7_4:dntag	2153	1821.75	2152.8	2499.6	2316.8	2216	2729.4	2483	1702.8
ACAGTACGAAAGGTAGGTCC	Standard	YHR062C::chr8_2:dntag	106.25	85.6	134	113.8	92.6	163	142.4	118.4	85.6
ACAGTAGAACACGCGAGCTG	Standard	YGR188C::chr00_10:dntag	512	630	769.8	1239.2	1057	1339.4	826	825	512.8
ACAGTCGGAAAGACGTACCC	Standard	YHR064C::chr00_8:dntag	78.5	67.2	95.2	91.2	59.6	229.4	94.2	81	64.2
ACAGTCTTAAAGGTCCACAC	Standard	YHR112C::chr8_2:dntag	1412.4	1111	1513.2	1427.2	1675.4	1614.8	1622.4	1401.6	940.4
ACAGTGCCAAAGCCAATCGG	Standard	YGL115W::chr7_2:uptag	377.6	251.4	723.8	498.4	346.6	790.4	657	607.8	225.6
ACAGTTAGAAAGTAGCGGCC	Standard	YHR113W::chr8_2:dntag	2658.6	2595.8	3037	2614.6	2277.8	2932.4	2601	2048.6	1702.2
ACAGTTCTAAAGCGGCACAC	Standard	YHR114W::chr8_2:dntag	1506	1184.6	1713.4	2350.25	2206.8	1947.6	1277	1352	1049.6
ACAGTTGCACACAGAACGCG	Standard	YHR115C::chr8_2:dntag	458.75	414.6	756.8	631.6	475.4	905.4	689	724.4	282.6
ACATAAAGAGATTTCCGCCC	Standard	YGR068C::chr7_4:dntag	1580.5	1576	1880	1770.8	1674	2014	2436.4	2499.4	1405.2
ACATAAGTAAATGCCGTCCC	Standard	YBR245C::chr2_4:dntag	1706	1510.25	2163.2	2410	2031	2335.2	2195.8	2255.4	1472.2
ACATACAACACCGCTTAGGG	Standard	YGR069W::chr7_4:dntag	1445	1296.75	1619.4	1804.2	1825.4	1901.2	1788	1747.6	1243.8
ACATACATAAATGGCTGCCC	Standard	YDR464W::chr4_8:dntag	72.25	65.6	73.4	73.2	68.8	79.8	81	77.6	59.2
ACATACCAACAGCACGGGTG	Standard	YGR070W::chr7_4:dntag	354.8	201	661.8	466.6	296.4	727.6	677	535.8	170.8
ACATACCGAAAGCTCTAGCG	Standard	YBR288C::chr00_16a:uptag	819.4	943.8	917.4	829.6	359.6	1508.6	1369.6	1213.8	365
ACATACTCAAAGGTCAGCCG	Standard	YBR289W::chr00_16a:uptag	251.2	154.6	486	343.2	197.8	577.6	477	448	158.4
ACATAGAACACCTGAGCCGG	Standard	YGR071C::chr7_4:dntag	596.4	698	958.4	1086.4	1211.4	1176.8	811.75	1084	431.6
ACATAGGAACACGGAGCCCT	Standard	YLR072W::chr12_2:uptag	960.6	920	949.8	1089.2	835.8	1114.8	756.8	935	386
ACATATCTAAAGGCCATGCC	Standard	YDR465C::chr4_8:dntag	549.5	475	559.8	515.4	481.6	698.4	542.2	608.2	371.8
ACATCACCAAAGGTTACTCG	Standard	YBR290W::chr00_1:uptag	3702	3223.2	3534.4	3831.4	3310.4	4300.6	3083.6	3673	1763
ACATCAGTAAAGTAGCTCCC	Standard	YBR291C::chr00_1:uptag	1594	1712	1467.6	1780.2	1052.8	2139.6	2326	2226	853.8
ACATCATGCAACCAAGCGTG	Standard	YDL230W::chr4_3:uptag	475.4	356.2	732.5	566.6	544.2	780.2	627.8	790.4	311.8
ACATCCGGCAACCAAATTGT	Standard	YGL148W::chr7_2:dntag	323.6	745.2	518.8	1042.8	640.75	1062.2	283.8	1378.2	439.6
ACATCGACAAAGTAGGCGCG	Standard	YCR067C::chr00_16a:uptag	1075.2	1130.4	1693	1612	1332.8	1848.2	1732.8	1898	903.4
ACATCGCAACACAGACGGGT	Standard	YCR068W::chr00_1:uptag	370.6	282.8	708.6	558.6	356.2	827	659.6	638	316.8
ACATCGCTAAAGCACATCGG	Standard	YCR069W::chr00_16a:uptag	3288.8	3041.5	4294.4	4244.6	3524.2	4447.2	3805.8	4024.8	2192.4
ACATCTAAATAAGTGCCGCG	Standard	YCR071C::chr00_1:uptag	88.8	115.6	180.6	148.2	112.4	223.6	196.2	215.2	124.4
ACATCTGAACACCACAGGGT	Standard	YLR073C::chr12_2:uptag	324	176	538.5	370.6	234	589.4	535.4	482.8	172
ACATCTTGAAAGGATACGCC	Standard	YBR246W::chr2_4:dntag	485.4	814.6	1086	1185.2	1116.6	1350	1298.8	1472.8	772.6
ACATGAGAACACGGCAGCGT	Standard	YBR296C::chr00_1:dntag	219	138.6	462.8	296.8	184	504.4	436.6	379.6	117.2
ACATGCAGAAAGTAGTCCGC	Standard	YBR297W::chr00_1:dntag	73.4	61.6	90.2	93.4	80	103	108.4	106.2	58.8
ACATGGATAAAGTCAGCCCG	Standard	YDL231C::chr4_3:uptag	363	319.8	790.75	769.8	593	923.2	705.2	707.6	259.8
ACATGGCGAAAGCACCACGT	Standard	YLR074C::chr12_2:uptag	164.4	114	223.4	160	128.6	275	226.2	238.8	100.2
ACATGGTAACAATGGATCGC	Standard	YBR247C::chr2_4:dntag	64.4	59.75	55.8	51.8	49	70.8	76.4	76	42.6
ACATTACAACACCTCATGGG	Standard	YDL232W::chr4_3:uptag	66	59.6	88.2	75	67.8	98.6	102.5	93	48.4
ACATTACTAAAGGTGCGACC	Standard	YBR298C::chr00_1:dntag	120.4	113.6	198.4	189.6	175.2	225.6	178.4	192	165
ACATTCTCAAAGGAAGCTCC	Standard	YDR466W::chr4_8:dntag	1610.25	1780.4	2346.2	1629.6	1602.2	2321	1859	2292.8	1291.6
ACATTGCACCAACACTAGGG	Standard	YDL233W::chr4_3:uptag	1902.2	1774.5	2328.4	2271.4	2159.2	2565.8	2714.2	2457.6	1328
ACATTGGAACACACATGCCG	Standard	YDL234C::chr4_3:uptag	306	173	563	400.6	231.8	638.2	545.2	513.4	169.2
ACATTGGCAAAGCGAACTCC	Standard	YDR467C::chr4_8:dntag	2296.75	2856	3049.25	2768.8	2665.4	3604	3581	3067.2	2037.6
ACATTGTTAAAGCTGTGGCC	Standard	YDR468C::chr4_8:dntag	65.6	63.6	70.4	72	71.6	86.6	78.6	79.4	54.6
ACATTTAACGAATACCGGCG	Standard	YBR300C::chr00_1:dntag	1128.8	821.2	1403.6	1251.4	1420.2	1712.2	1382.4	1571	847
ACATTTAGAACACTACCGCG	Standard	YCR086W::chr00_1:dntag	70.25	64.75	83.8	89.2	81	106.2	80.6	98.4	57.2
ACATTTATACACATCGGCGC	Standard	YCR087C-A::chr00_1:dntag	875.5	931.5	1722.4	1613.6	1385.4	1570	1777.6	1861.6	1143
ACATTTCTAACACCGTCAGG	Standard	YGR072W::chr7_4:dntag	563	688.8	904	899.2	872.4	1053.4	523.8	916.2	270.4
ACCAAAGGAAATGGCCTCCG	Standard	YGR094W::chr7_4:uptag	50	47.6	53.4	59.6	51.2	62.4	56.2	58.4	42.6
ACCAACAGAACACGTCGTTT	Standard	YCR087W::chr00_1:dntag	471	449.8	790.4	763	671.6	1099	613.4	878	421.6
ACCAACATAAATTCCCGTGG	Standard	YGL116W::chr7_2:uptag	56.6	51.2	60.75	56.6	52	66.2	66.4	64.4	45
ACCAACCAACACGTATGGGT	Standard	YLR075W::chr12_2:uptag	87.4	85.75	115.2	90	76.4	141.8	119.8	115	64.2
ACCAACCCAAAGTACGTGTG	Standard	YCR088W::chr00_16a:dntag	2755.2	2736.5	3496.5	3807.8	3127.4	3636.6	3580.5	3745	3134.8
ACCAAGAACACGTTACGGGT	Standard	YPL132W::chr00_8:uptag	56.5	63.8	73.8	72.6	59	80.4	79	70.8	61.4
ACCAAGACAACACTCTGTGG	Standard	YPL131W::chr00_8:uptag	60.4	62.4	74.8	80.4	65.8	86.8	86.8	76.8	52.4
ACCAATGCAAATAGGCGGCC	Standard	YGR020C::chr7_3:dntag	66.2	61.6	72.4	65.6	62.4	94	83.8	95.6	53.4
ACCACAAGAACAGCGGCGTT	Standard	YGR073C::chr7_4:dntag	330.2	213.25	642	452	301.4	678.8	580.2	551.2	188.4
ACCACACAAAGTCAGTGCG	Standard	YPL129W::chr16_2:uptag	299	197.75	580	398.2	258.8	657	523	500.8	181.8
ACCACACAACAGAGGCGGTT	Standard	YLR076C::chr12_2:uptag	296.6	179.5	593.8	412	286.6	670.8	494	471.6	173.4
ACCACACGAAAGTATGTCCG	Standard	YPL130W::chr16_2:uptag	1343.8	1399	1797.8	1880.8	1894.2	2027.2	2087.2	2114.6	1119
ACCACCGGAAAGCAGCTAGT	Standard	YLR077W::chr12_2:uptag	443.8	370.6	863.8	728.4	715.8	981.6	710.4	687.2	347.8
ACCACGGAACACGAACTGTG	Standard	YPL168W::chr16_2:dntag	524.2	486	685	449.2	421.4	825.2	638	679	511.6
ACCACTATAAAGTTACCGCG	Standard	YPL167C::chr16_2:dntag	1705.75	1655	2303	1865	1447.8	2312.2	2148.8	2124.2	1736.2
ACCAGAAACACGGGAGCCTT	Standard	YGR074W::chr7_4:dntag	99.8	83.5	160.6	120.8	88.6	163.2	154.2	143.8	65
ACCAGAACAGAAGGGCGCTT	Standard	YGR075C::chr7_4:dntag	181	123	362.4	231.4	159.6	424.6	317.2	320	119.8
ACCAGATAACACGTAGTCCG	Standard	YPL166W::chr16_2:dntag	1672.25	1651.8	2064.6	1265	1076.4	1953.6	1728.6	1604.4	1456.4
ACCAGCACAAAGTCTACTGT	Standard	YPL111W::chr16_2:dntag	1443.2	1265	1795.4	1763.8	1459.6	2312.6	1761.2	1914.4	1263
ACCAGCCAACACGGGATAGT	Standard	YLR078C::chr12_2:uptag	250.6	171	509.2	329.8	228.4	568	431.4	410	151.4
ACCAGCCTAAAGCGTCAGAG	Standard	YPL110C::chr16_2:dntag	323.8	222.4	602	449.4	317	698.4	516	519.4	198.4
ACCAGGAGAAAGTGACCCTC	Standard	YBR248C::chr2_4:dntag	150	110.4	80.6	76.8	70.2	83.6	82.6	90.8	119
ACCAGGGTAAAGCCGTACAC	Standard	YPL109C::chr16_2:dntag	1001.8	1378.8	1691.8	1749.6	2142.4	1873.4	1891.2	1798.8	1055
ACCAGTGGAAAGGAACGTCC	Standard	YBR249C::chr2_4:dntag	341.8	306	951	615.8	593	1073.6	718.8	869.2	264.2
ACCATAAACACTAGGTCCTG	Standard	YGR076C::chr7_4:dntag	58.25	54	82	66.4	61.8	73.8	77.4	69	54
ACCATAACAAGTATTCCCGG	Standard	YDL235C::chr4_3:uptag	55.6	53.2	63.6	64	56	68.4	72	66.6	47.2
ACCATAAGAACACGGTCGCG	Standard	YNL204C::chr14_2:uptag	181.75	194.4	222	217.6	167.4	275	234.2	196.6	194.8
ACCATACTAAAGTCGCATCG	Standard	YNL202W::chr14_2:uptag	2845.6	2557.4	2374.4	2948	2904.4	3040.6	2901.2	2992	2532.6
ACCATCAGAAATACGTGCC	Standard	YBR250W::chr2_4:dntag	100.6	92.8	150.25	121.8	109	175.8	179	144.4	95.8
ACCATGCAACAGAACTGCGG	Standard	YDL236W::chr4_3:uptag	395	264.6	713.75	550	379.6	826.2	658.4	646.4	276
ACCATGCCAAAGGAATGCCG	Standard	YGR095C::chr7_4:uptag	185.8	119.6	425.4	326.2	176.8	529.5	407.2	410.6	124.2
ACCATGTAACAAGTCATCGC	Standard	YGR077C::chr7_4:dntag	640.8	909.6	963	979.8	887.8	991.2	674.6	1375.4	857
ACCATTAAATACACCGGCGT	Standard	YGR078C::chr7_4:dntag	1428	1358.8	1546	1533.6	1355.2	1747.2	1333.4	1825.2	856.8
ACCATTTGAAAGAGTGAGCC	Standard	YDR469W::chr4_8:dntag	165	226.6	368	514.8	305.8	636.4	382.6	631.2	137.8
ACCCACGTAAAGCTATGACG	Standard	YNL203C::chr14_2:uptag	92	89.6	160.6	126.2	91.4	162.6	128.4	130.4	67.6
ACCCATACAAACGTGATCGG	Standard	YNL201C::chr14_2:uptag	434.4	574	550.2	367.2	422.8	590.4	537.2	481	349.2
ACCCATGAACACAAGTTGCG	Standard	YDL237W::chr4_3:uptag	85.8	74.8	102	90.2	79.2	118.4	118	114.6	55.2
ACCCGAGGAAAGAGGCCATT	Standard	YGL149W::chr7_2:dntag	1160.4	871.4	1811	1762.6	1214.8	2012.2	1554.8	1300.4	1180.6
ACCCGATAAAGTTAATCGC	Standard	YBR251W::chr2_4:dntag	65	66.2	79.2	76.8	74.4	85.8	78.2	84.4	55
ACCCGATTAAAGATTCACCG	Standard	YDL238C::chr4_3:uptag	1222.8	1112.25	1033	908	728.8	982.8	844.5	1031.6	509.6
ACCCGCGTACAAAGATGATG	Standard	YNL240C::chr14_2:dntag	104.2	107	134.2	137.2	135	158.2	175.2	153.6	75.8
ACCCGCTAACACAGTAGAGG	Standard	YNL239W::chr14_2:dntag	546.2	547.8	1059.2	1043.4	874.6	1202	862	961	436.4
ACCCGCTGAAAGCAGAACGT	Standard	YLR079W::chr12_2:uptag	129.2	162.4	115.6	156.4	145.4	332.8	249.4	161.4	120
ACCCGGTGAAACTTCCATAA	Standard	YLR173W::chr12_3:uptag	67.2	77	79.6	77.2	81.5	98.4	107.8	96.4	61.2
ACCCGTCTAAAGCTCTATGA	Standard	YNL238W::chr14_2:dntag	702.25	940.8	444.6	1248.2	659.8	1497.6	758.6	1179.6	226.4
ACCCTAGAACACGACGAGGT	Standard	YNL237W::chr14_2:dntag	80.4	73.2	115.2	113.4	117.6	120.2	114.2	102.4	58.2
ACCCTATGAAAGTAAGCTCC	Standard	YBR252W::chr2_4:dntag	60.25	59.2	71.4	67.4	61	73	66.6	76.4	48.4
ACCCTCCAACAGAGTAGAGT	Standard	YNL181W::chr14_2:dntag	342	223.75	591.6	449.4	298.6	679.6	555.2	509.4	192
ACCCTGAGAAAGTGGAATCC	Standard	YDR470C::chr4_8:dntag	55.5	53.4	61.2	61.4	57.4	73.6	70.2	67.2	52
ACCCTGCTAAAGAAGACCGG	Standard	YDL239C::chr4_3:uptag	2586.8	2152.4	2382.6	2756	2231.4	2711.4	2619.2	2855.8	1381
ACCCTTACAAAGAGTTACCG	Standard	YNL180C::chr14_2:dntag	3251.25	2743.2	3935.8	2765.4	2742.2	3303.6	4673.6	3573.2	2357.4
ACCCTTCAACACAATAGGTG	Standard	YDL240W::chr4_3:uptag	111.8	109.25	154.25	133.6	110.6	156.2	139.5	152.2	76.8
ACCCTTCGACACGAGAATAG	Standard	YGR079W::chr7_4:dntag	66.6	53.8	76.8	67.8	60.6	78.4	79	74	48.6
ACCGAAACAACCCGAGGTGT	Standard	YLR080W::chr12_2:uptag	890.6	1334.67	1185.4	1783.6	1727	1413.6	1073.2	1074.6	407.2
ACCGAAAGGGAAATCCGTGC	Standard	YDR471W::chr4_8:dntag	1216.25	1463.2	1651.6	1995.4	1553.8	1837.2	2080.8	2217	1597.2
ACCGAACGAAATATCCCGTG	Standard	YNL179C::chr14_2:dntag	1391.25	1905.2	1833.8	2584.2	1435.4	2811	1627	2505.8	928.6
ACCGAAGTAAATACGTGTCC	Standard	YNL178W::chr14_2:dntag	74.6	70.6	85.2	86	69	86.4	111.6	98.8	58.6
ACCGACCGAAAGGTACACGT	Standard	YJL004C::chr00_13:uptag	3739.2	4205.6	4230.6	4638.4	4295.6	4957	3642.4	4356.75	1573.6
ACCGACGCAAAGTCAACGTG	Standard	YJL003W::chr00_13:uptag	74.2	65.8	89.2	88.6	85.8	111	107.2	107.8	66.2
ACCGACTAACACACGATGGG	Standard	YJL002C::chr00_13:uptag	149.8	118.6	233	190.4	122.4	307	226.25	223.6	92.2
ACCGACTTAAAGAGCTTACC	Standard	YJL001W::chr00_13:uptag	87.2	78	100	89.8	81.8	95.4	95.4	93	67.6
ACCGAGACAAATAGTCGCCG	Standard	YJR055W::chr00_13:uptag	89.8	79.5	98.6	93.25	88.8	112	107.8	102.6	68.8
ACCGATTGAAAGTACACTCC	Standard	YJR056C::chr00_13:uptag	59	57.6	66.4	64.6	64.6	67.4	66.8	69	50.4
ACCGCAAAGGAGAGACCGTT	Standard	YLR081W::chr12_2:uptag	2940.6	2807.6	2395.4	2726.4	2909.2	2751.6	2999.6	2960	1441.6
ACCGCAATAAATATGGCCGC	Standard	YDR472W::chr4_8:dntag	57.6	68.5	70.4	68	64.8	76.8	82.4	71.4	50.2
ACCGCCAGAAAGTCTAGTAC	Standard	YJR018W::chr00_13:dntag	195.8	131.2	326.2	248.6	169	396.6	272.2	273.4	123.2
ACCGCCGTAAAGGAGTACAC	Standard	YJR017C::chr00_13:dntag	66.5	74.2	77.4	73.8	61.6	77	75.25	87.2	55
ACCGCGAAATAACATCCGTG	Standard	YJR020W::chr00_13:dntag	1433.6	1777.2	2162.8	2233.2	2062.8	1978.8	1966.8	1876	1436.4
ACCGCGCAACAGAATCAGGT	Standard	YLR082C::chr12_2:uptag	234	221.2	401.8	249	273.4	467.4	392.4	391.8	210.2
ACCGCGCCAAAGGAGCATAT	Standard	YDR147W::chr4_5:dntag	248.4	159.2	443.5	284.4	207.4	496.2	362	371.8	149.6
ACCGCGTTAAAGCTACTACA	Standard	YJR019C::chr00_13:dntag	77.8	79.4	82.8	84.4	79.2	88	92.4	90.8	60.8
ACCGCTACAAAGTGATACCG	Standard	YIL108W::chr9_2:uptag	1165.8	1140.8	1876.2	1794.8	1871.8	1895.4	1722.4	1650	630.8
ACCGCTCGAAAGCTAGATAC	Standard	YIL109C::chr9_2:uptag	88.6	81.2	94	91.4	87.2	109.4	104	91	67.4
ACCGGAGAAACTACGCCGT	Standard	YAL025C::chr1_1:uptag	59.2	62	70.8	67.6	63.8	68	82.8	75.6	50.8
ACCGGCAGAAAGTTACAGCC	Standard	YBR253W::chr2_4:dntag	239.6	143.4	478	326.4	200.6	578.4	449.2	433	156
ACCGGCGTAAAGCGTCTACA	Standard	YIL111W::chr9_2:uptag	3202.25	3273.4	2801	3937	4130.2	3064.6	3979.8	4493.2	2394.2
ACCGGCTAACACGATAGACG	Standard	YEL001C::chr5_2:uptag	2703	2360.6	3319.4	3047.4	3300.6	2626.8	3556.4	3283.8	1656.2
ACCGGGATAAATACAGCCCT	Standard	YDR148C::chr4_5:dntag	253.2	151.4	483.25	319	222	546.6	422.2	419	141
ACCGTAAAGGCCAACACGTT	Standard	YLR083C::chr12_2:uptag	1056.4	997	1448.4	1368.2	1060.8	1248.8	1434.6	1273.4	538.8
ACCGTAAGAAACCGTATGCC	Standard	YEL002C::chr5_2:uptag	72.4	56.8	67	65.2	59.4	69	73	66.6	51.2
ACCGTACTAAAGCACCATGT	Standard	YGR080W::chr7_4:dntag	1812.25	1686	2392.4	1785.8	1378.2	2094.4	1958.25	1886.2	1651.4
ACCGTAGCAAAGTGGACGAC	Standard	YEL003W::chr5_2:uptag	1228.8	1089.8	208.4	177.2	157.8	636.8	480	429.2	753.6
ACCGTATAACACTAGAGCCG	Standard	YEL004W::chr5_2:uptag	1028.2	831.6	1123.6	1102	1139	1405.6	1062.6	1154.6	565
ACCGTCACAAAGTTAGACCG	Standard	YEL039C::chr5_2:uptag	3362.2	2612.4	3434.2	3102	2893.2	3654.8	2912.6	3200.4	1558.6
ACCGTCCAACACTGAGAGAG	Standard	YEL040W::chr5_2:uptag	401.4	342.8	693.4	528.6	453	844.6	634.4	726.6	352.6
ACCGTCTTAAAGTTACGACC	Standard	YEL041W::chr5_2:uptag	987.5	944.2	853	957.6	806.8	779.2	1124.6	1271	736.6
ACCGTGAAATAACCCACTGT	Standard	YLR084C::chr12_2:uptag	1513.2	1432.4	1205.6	1893.8	1883.4	1481.2	2220.5	2242.2	790.6
ACCGTGATAGAACACTGACC	Standard	YEL042W::chr5_2:uptag	2393.75	2548.2	2455.2	2870.4	2319.4	2874.4	2971	2923.6	1608
ACCGTGTAACAGAAATGTCG	Standard	YER001W::chr5_2:uptag	2848.2	2643.2	2724.8	3404.2	3179	3525.2	2330.8	2974.8	1574.4
ACCGTGTCAAAGGACGACCA	Standard	YER002W::chr5_2:uptag	809	822.4	970.4	1499	1126.8	1424.2	1088.8	1530.4	760.6
ACCGTTCCAACTATAAGCG	Standard	YER049W::chr5_3:uptag	1015.2	1103.6	1717.6	1663	1354	1587.4	1494.8	1679.8	1112.4
ACCTAAGCAAATATCGCGCT	Standard	YLR085C::chr12_2:uptag	1029.6	1950.8	464.6	2270.6	788.2	1702.8	1333	2593.4	436.6
ACCTAAGTAAACGGCGTACC	Standard	YER050C::chr5_3:uptag	71.25	63.6	85.4	73.2	70	87.8	89	85	55.8
ACCTAATAACACTCACGGGT	Standard	YER051W::chr5_3:uptag	121	105.6	113.2	105.8	98.4	120	119.2	129.4	69.8
ACCTACCTAAAGTGACATCG	Standard	YER052C::chr5_3:uptag	61.2	64.2	72.6	74.6	68.8	77.8	82.6	78.6	55.4
ACCTACGAACACTAAGTCGG	Standard	YER098W::chr00_8:uptag	1945.4	2524.6	2220.8	1913.4	2577.2	1965	1975.2	1935.4	1371.2
ACCTACGGAAAGTCAAGCCG	Standard	YDL227C::ctrl_32:dntag	6136.8	5717	4417.8	4488.6	4742.4	4472.2	4398.6	4682	3790.2
ACCTAGCAACAGAGACCGTG	Standard	YER101C::chr00_5:uptag	366	248.6	685.6	522.2	345	793.8	660.8	626	240.8
ACCTAGTGAAACAGGACTCC	Standard	YER155C::chr00_5:uptag	340	266.2	331.2	473.8	414.8	519.4	444	698.2	299.8
ACCTATACAAACCTAGCGGG	Standard	YER156C::chr00_5:uptag	1007.4	1238	1171.8	1292	1467.4	1261.8	1178.25	1270.6	671.8
ACCTCAAAGGATCACACGGG	Standard	YDL241W::chr4_3:uptag	1067.6	1089.8	1706.25	1708	1022.6	1662.2	1156.75	1281.4	448
ACCTCAAGAAACCTCAGTGG	Standard	YDL242W::chr4_3:uptag	3592	3203.6	3935.2	3857.2	4016.4	3839.75	3830.6	4008.4	1630.4
ACCTCACAACAGATAGCGGG	Standard	YER157W::chr00_5:uptag	332.4	216.25	593.4	419.6	305.8	679	569.25	515	182.4
ACCTCATAACACTATCAGGG	Standard	YER158C::chr00_5:uptag	443.8	484	491.6	642.6	756	516.2	708.6	770.6	400.4
ACCTCCTCAAAGGCTAAGAG	Standard	YDL243C::chr4_3:uptag	275	251.8	386	471.2	251.2	446	468.2	429.2	254.2
ACCTCGAAATAACGACCGGG	Standard	YML112W::chr00_9:uptag	76.6	65	77.8	71.6	70.2	84.4	81	81.2	60.8
ACCTCGACAAATACACGTTG	Standard	YML111W::chr00_9:uptag	2924.5	2916.4	3420.6	3352	2459.6	3686.4	3605.6	4159.8	2076
ACCTCGATAAAGCAGATGCC	Standard	YBR254C::chr2_4:dntag	88.6	78.6	100.2	99.2	77.4	121.6	125.4	115.2	68.4
ACCTCGCAACACGGTGAGAA	Standard	YML110C::chr00_9:uptag	89	84	126.25	119	94.2	136.2	128.2	115.6	71.8
ACCTCTAGCAACGAACATGG	Standard	YML109W::chr00_9:uptag	4144.2	4178.4	5133.75	5431.8	5044	5557.8	5029	5553.8	2632.8
ACCTCTCTAAAGTACAAGC	Standard	YML053C::chr13_1b:uptag	3291.6	3018.6	3312.8	3302.2	3179.2	3524.6	3134.2	3456.4	1825.4
ACCTGACAACACTATACGGT	Standard	YML052W::chr13_1b:uptag	2085.2	2162.8	2342.6	2753	2883.6	2751.6	2647.2	2545.6	944
ACCTGAGTAAATACCACCGG	Standard	YML051W::chr13_1b:uptag	2090.4	2200.2	3174.4	3455.8	3603.6	3253.2	3391.8	3161.8	1393.4
ACCTGCTAAAGGATAGCAC	Standard	YML050W::chr13_1b:uptag	1883.8	1388.6	1248	1514.6	1262.6	1452.4	1258.2	1601	724.6
ACCTGGAGAAAGCGTACACC	Standard	YMR005W::chr13_2:uptag	63.8	55.8	63.4	63.4	62	67.2	71.2	67.4	47.8
ACCTGGGAACACCATGACAG	Standard	YDR001C::chr4_3:uptag	1547.6	1889.4	1800.8	2530.8	2377	3028.6	1871.2	2628.2	814
ACCTGGTTAAAGTACGACAC	Standard	YMR006C::chr13_2:uptag	2351.25	1950.4	2840.4	3249.2	3502	2938.2	3173.4	2962.4	1499.4
ACCTGTAGAGAAATTACCCG	Standard	YGR081C::chr7_4:dntag	1753.8	1418.2	1890.2	1652.6	1250.2	2267.6	1890	2035	1361.6
ACCTGTATAAAGTGATCCGC	Standard	YMR007W::chr13_2:uptag	2644.6	3061.4	3322.4	4021.4	3688	3807	3877.6	3602.8	2028
ACCTGTCACGACTAGCTGA	Standard	YPL253C::chr16_1:dntag	452.8	541.8	670.8	517.6	510.6	971.8	845.4	817.4	403
ACCTTAACACAGTCACAGGG	Standard	YMR008C::chr13_2:uptag	375.6	277.6	712.2	551.4	393	789.6	669.5	612.4	287.8
ACCTTAATAAACGCCATCGG	Standard	YDR002W::chr4_3:uptag	102	87	135	119	100.4	152	146	133.2	72.8
ACCTTACGAAATACAGCGCG	Standard	YER116C::chr00_5:dntag	143.2	162.8	225	221.25	127	239.8	217.4	230.2	138.8
ACCTTAGTAAAGTGTAGCCC	Standard	YER117W::chr00_5:dntag	72.2	69.6	79	83.4	71.2	96.8	92.6	90.6	60.6
ACCTTCACAAATACGACGGG	Standard	YER118C::chr00_5:dntag	3449.25	3178.6	3882	3949	3689	4158.8	4237	4134.2	3130.2
ACCTTCCCAAAGTAACAGGG	Standard	YGL117W::chr7_2:uptag	81	76.6	125	117	102	161	132.2	139	65.2
ACCTTTAACGACCAAGACGG	Standard	YER119C::chr00_5:dntag	1525.8	1818.8	1653.4	1827.2	2112.2	1689.8	1859.6	2114	1473.8
ACCTTTAGAAACAGAGTCGC	Standard	YMR125W::chr00_9:uptag	84	77.5	153.8	118.8	89	328.8	155.4	133.8	77.2
ACCTTTCTAAATATGCGCCG	Standard	YDR003W::chr4_3:uptag	1039.8	816.4	903	948	1038.2	1415.8	1335	1509.8	877.6
ACGAAACAATACTTCCGCTG	Standard	YMR126C::chr00_9:uptag	1302.8	1200.6	1469.6	1549.8	1173.2	1721.4	1516.8	1812.2	585
ACGAAAGAAGAGGCCGTCCT	Standard	YLR086W::chr12_2:uptag	82.6	75.25	83.6	90.6	77.4	102.8	95.8	92.6	66.6
ACGAAATCAAATTCCGGTCC	Standard	YDR473C::chr4_8:dntag	72.8	73.8	87.5	87.4	74	92.8	92	84.4	60.2
ACGAACGAACACGTCACGGT	Standard	YMR127C::chr00_9:uptag	84	84.6	147.8	130.8	114.6	140.8	125.4	125.6	70.2
ACGAACGTAAATAGTCTGCC	Standard	YMR128W::chr00_9:uptag	52.2	53	62.6	63	60.2	64.8	64.8	63	47
ACGAAGCGAAATAGGTTCCC	Standard	YBR255W::chr2_4:dntag	819.2	618.5	1628	1163	1258	1696.2	1698.4	1617.2	879.4
ACGAAGTAACACGTCCTACG	Standard	YMR183C::chr13_4:uptag	1271.4	1876	2683.2	2499	2680.6	2605.4	2750.4	2420	1289.4
ACGAATAAACCTCACCGGGT	Standard	YLR087C::chr12_2:uptag	1929.4	1591.8	1190.4	1321.8	1102.2	1547.4	1940.5	1733.8	704.8
ACGAATAGAAATGTGGCCGC	Standard	YBR256C::chr2_4:dntag	57.2	54	62.4	61.4	58	62.4	63.6	66	48.4
ACGAATCAACACTCAGCGGT	Standard	YMR184W::chr13_4:uptag	184.6	99	345.4	234.75	123.8	418.6	345.4	323.2	114.8
ACGACAAACAGAGGGCCGTT	Standard	YLR088W::chr12_2:uptag	220.8	160.25	464.2	305.6	210	523.8	403.8	399.2	154.2
ACGACACAACCACAGTTTGG	Standard	YMR185W::chr13_4:uptag	368.6	227.6	763	539.4	343	816.6	731	638.6	224
ACGACACTAAATATGGTCCC	Standard	YMR186W::chr13_4:uptag	3287.6	2750.5	3307	3351	2509	3401.2	3125	3303.4	1661.6
ACGACAGGAAATAGTGTTCG	Standard	YDL227C::ctrl_46:dntag	4748.8	4199.8	3679.4	3774.8	3911.4	3909.4	3886.8	4252.8	2548.4
ACGACATCAAACGTCTAGCG	Standard	YMR155W::chr13_4:dntag	2230.75	2295.2	3243	3861.4	3129.8	3879.4	2916.4	3009.4	2098
ACGACCACAACATACGGGTG	Standard	YMR156C::chr13_4:dntag	406.2	342.6	616.8	580.4	755.2	674.2	564.4	595.6	360
ACGACCCTAAAGTCTAATCG	Standard	YMR157C::chr13_4:dntag	2585.2	2379.8	3617.2	2848.8	2574.6	3360	2680.2	3751.4	2772
ACGACCTTAAATCAACTGCG	Standard	YMR214W::chr13_4:dntag	1636.8	2170.8	2735.6	2949.8	2263	2837	2342.6	2511.2	1676
ACGACGATAAACGTGATTCC	Standard	YMR215W::chr13_4:dntag	523.5	388.6	431	546.6	457.6	655.6	473.2	645.2	528.2
ACGACGTAACACGATCACTG	Standard	YMR216C::chr13_4:dntag	1317.8	874.8	1605.6	1391.8	1193	1675.8	1284.4	1324.4	841.8
ACGACTGAACACTACGACGG	Standard	YMR217W::chr13_4:dntag	87	85.6	94.4	92.8	80	96.2	105.6	86.6	71.2
ACGACTGCAAAGGCTAGTAC	Standard	YLR186W::chr00_11:uptag	70.6	78	78	80.2	75.6	95.6	92.6	89.2	61.6
ACGACTTCAAAGGGCAAGCC	Standard	YDR474C::chr4_8:dntag	1858.5	1645.6	2542.2	2516.6	1643.6	2451.2	2251.2	2469.8	2067.4
ACGAGAACAAGCGTACCGTC	Standard	YAL023C::chr1_1:uptag	686	816	1280.6	1370.4	1491.8	1522.4	1078	1332.8	1075.2
ACGAGAGTAAATATGCTGCC	Standard	YAL022C::chr1_1:uptag	3489	2916.8	3902	4417	3848.4	4331.6	3916.5	4560.4	2163.4
ACGAGCGAACACTAGCTGAC	Standard	YAL021C::chr1_1:uptag	79.4	80	117.4	98	72.8	139.8	117	99.6	63.2
ACGAGCGCAAAGGGATCACT	Standard	YLR089C::chr12_2:uptag	2882.5	2461	3518	3034.4	2954.2	4325.8	3813	3488.8	1603.4
ACGAGGAAATAGACCTGCC	Standard	YBR257W::chr2_4:dntag	68.4	68	75.4	76	68.2	84.6	78	75	53.8
ACGAGGCGAAAGGCTACACT	Standard	YOL143C::chr00_10:uptag	72	78.6	74.4	73.8	69.6	93.8	74.75	78	57.6
ACGAGGTTAAAGTCAAGTCC	Standard	YER027C::chr5_3:dntag	64.2	61.75	73.8	71	69.2	78	74.8	74.8	50.2
ACGAGTACAAACGGATTGCC	Standard	YER028C::chr5_3:dntag	2168	1655.8	2717.75	2570.6	2306.8	2728.2	3023	2840.4	2695.8
ACGAGTAGAAATGACGCTCC	Standard	YOL144W::chr00_10:uptag	52.75	49.4	59.75	59.6	57	63.6	60.8	57.6	47.4
ACGAGTGTAAAGTAGACGCC	Standard	YER081W::chr5_3:dntag	2146.4	2343.6	3836.8	3638.2	3066.6	3790.6	3544	4108.4	3410.2
ACGAGTTTAACCGCGAAGAC	Standard	YER082C::chr5_3:dntag	67.2	62.8	85.6	78	71.2	84.2	96.2	86.2	60.8
ACGATAATAACAGCTCCTCG	Standard	YER083C::chr5_3:dntag	231.4	263.2	352.4	402.2	217.6	621.6	417.6	577.8	108.8
ACGATACTAAATGATCCCGC	Standard	YER084W::chr5_3:dntag	1179.4	1371	1269	1336.6	786.4	1501.6	1798	1895.8	1049.8
ACGATATGAAAGTTCCACCC	Standard	YBR258C::chr2_4:dntag	2517.6	2805.8	3962.2	3314.8	2353	3563	3789.6	3944.4	2234.6
ACGATCCAACAGACACGGGT	Standard	YHL007C::chr8_1:uptag	330.6	231	653.6	460	301.4	712.6	592.2	537.6	190.4
ACGATCCTAAAGTACCCAGG	Standard	YHL006C::chr8_1:uptag	1670.4	1605.4	1800	2230.4	2183.8	2332.4	1584.4	2021.4	812
ACGATTCCAAAGGATGAGCC	Standard	YDR475C::chr4_8:dntag	322.75	291.8	798.8	535.2	471.6	604.6	572.8	627	418.6
ACGATTCGACACGCAACGAG	Standard	YHL005C::chr8_1:uptag	342.2	398.4	871.8	772.4	646.2	955.8	871.6	1111.2	369
ACGATTGCACACGCACAGAG	Standard	YOL163W::chr00_10:uptag	353.75	238.8	668.8	496	338.4	757.6	665.2	615.2	224.8
ACGATTTAAGACGACACCCG	Standard	YHL038C::chr8_1:dntag	54	58.4	72.8	65.6	63.2	79.6	77.6	73.2	53
ACGCAAAGTTAATACCCTGC	Standard	YGR082W::chr00_14:dntag	65.8	65.4	65	70.2	65.4	75.2	73.4	85.6	55.6
ACGCAACCAACAGCGAGTGT	Standard	YHL037C::chr8_1:dntag	422.25	304.8	721.4	612.8	497.2	897.8	664.6	616.8	326.6
ACGCAACGAACCACAGGTGT	Standard	YHL036W::chr8_1:dntag	142.6	138	256.8	210.4	217.6	338.6	214.25	202.2	125
ACGCACCGAAAGTGAGCGAT	Standard	YHR024C::chr8_1:dntag	160.6	176	137.2	160.4	142.2	152.6	166.6	133.8	143.4
ACGCAGTCAAAGTCATATCC	Standard	YPL248C::chr16_1:uptag	3125.6	3410.2	3712	4059.6	3497.2	4338.2	4254.8	4122	1891.4
ACGCATACAAATCAGGCCGG	Standard	YDR004W::chr4_3:uptag	515	535.25	473.4	840	848.6	720.6	634.6	662	159.4
ACGCATTTAACCTAACAGCG	Standard	YPL247C::chr16_1:uptag	905.6	1015.2	906.8	726	813	1307.4	1111	925.4	739.6
ACGCCGTAACACGTACATAG	Standard	YPL246C::chr16_1:uptag	3380.75	3392	3950.4	3842.4	3423.4	4391	5151.8	4621.2	2362.2
ACGCCTAGACAACAGTACGG	Standard	YPL245W::chr16_1:uptag	1063.75	1326.6	1664.4	1790.8	1244.4	1732.6	2104	1929	958.6
ACGCCTATAAAGTGCAACCG	Standard	YPL189W::chr16_1:uptag	76.2	76	87.8	83.8	81.4	91.2	104.8	84.4	61.8
ACGCCTCCAAAGGTCTAGGA	Standard	YNL095C::chr00_16b:uptag	3449	3571	3644.25	3885.4	4206	4087.8	3619.4	3909.6	1953.2
ACGCGAAAGTACAGACCCTT	Standard	YPL188W::chr16_1:uptag	94	97	115.6	99.4	90	138.8	126.2	115.4	68.8
ACGCGCACAACAGGAGACTT	Standard	YPL226W::chr16_1:dntag	123.6	124.75	303.6	232.8	169.4	352	273.4	250.4	121.6
ACGCGCCGAAAGGGTTACAA	Standard	YNL093W::chr00_16b:uptag	1975.6	1738.75	2407.4	2430.4	2158.4	2756.2	2040.6	2356.6	1160.6
ACGCGCGAAAGCGTCATAA	Standard	YMR265C::chr13_5:dntag	2305	1933.4	2079.4	2996.6	2286.4	2269.4	1978.8	2590.8	2878.6
ACGCGCTAACAAGAAGCCGT	Standard	YPL225W::chr16_1:dntag	1807.5	2468	2489	3617	2546.2	3694.6	3302.2	4262.4	2121.2
ACGCGGATACAAATATGTCG	Standard	YPL223C::chr16_1:dntag	2170	1998.6	2794.8	4021	3902.4	3217.6	3353.6	2817.6	2147.2
ACGCGGCAACACGTCATAAG	Standard	YNL319W::chr14_1:uptag	1893.6	1769.4	3272.8	2774.4	2538.6	3140	2801.2	2819	1146.8
ACGCGGCTAAAGGTAGATAC	Standard	YNL318C::chr14_1:uptag	3419.4	2993.4	3666.75	4011	3849	3753.2	3702.4	3882.6	2087
ACGCGGGAACACACTACAGT	Standard	YGR083C::chr7_4:dntag	96.2	83	98.2	108.8	86.2	106.2	97.4	101	58.4
ACGCGGTGAAAGGTATTTAC	Standard	YNL317W::chr14_1:uptag	86.4	93.8	121	120.2	87.8	146	132.2	114.8	107.2
ACGCTAACACGTCTACAAGG	Standard	YNL316C::chr00_8:uptag	586.25	685.25	998.2	1074.2	1116.6	1175	916	956.6	455
ACGCTAAGAAACGGCAGTCC	Standard	YNL259C::chr14_1:uptag	132.8	111	216.4	129.4	112.6	212.8	202.4	217.6	68.6
ACGCTACTAAATACCATGCG	Standard	YNL258C::chr14_1:uptag	55.4	51.25	65	64.2	59.4	73.8	84.2	76.4	51.2
ACGCTCAAATAATACTCGCG	Standard	YNL257C::chr14_1:uptag	374.6	296	404.8	146.8	73	373.8	593.8	504.4	336.4
ACGCTCATAAACAGACTTCG	Standard	YNL256W::chr00_8:uptag	87.8	71.8	91.8	85	74.2	114.8	112.8	86.8	58.6
ACGCTCGCAAAGGTCGTACA	Standard	YNL303W::chr14_1:dntag	3132.5	2901.6	3908.6	3712.6	3451.4	4163	3244.6	3403.8	2810
ACGCTCTTAAATATACCGCG	Standard	YNL302C::chr14_1:dntag	1211.8	1065.25	723.8	1067	1199.4	966.2	1135.2	1066.2	773.6
ACGCTGAGACAAATCCACGG	Standard	YGR084C::chr7_4:dntag	1180.6	1078.6	2008.6	2006.4	1753.4	2487.4	1677.6	2188.2	1374
ACGCTGCGAAAGGTGAATC	Standard	YNL301C::chr14_1:dntag	219.2	203.8	549.8	601.6	508.4	446.6	461	431.6	338.2
ACGCTGGTAATGTCCATACA	Standard	YNL300W::chr00_8:dntag	2071.5	1739.8	2604	2631.8	1786.6	2783.4	2234.8	2418.8	1901.6
ACGCTTCCAAACTGTCTGAA	Standard	YNL092W::chr14_3:uptag	98.2	98	157.75	188.4	180.2	185.6	158.6	161.8	98.2
ACGCTTGGAAACTGTTAGAC	Standard	YNL255C::chr14_1:dntag	2766.4	2665.2	2612	2288.75	3357.2	2530	3244.75	3049	2840.6
ACGGACAAATACGCACCTGT	Standard	YNL254C::chr14_1:dntag	2507.4	2371.6	3341	1959.6	1419.4	3498.2	2908	3449.2	2577.2
ACGGACCCAAATATACGCGG	Standard	YNL253W::chr14_1:dntag	1557.6	1557	2167.6	822.4	763.8	2062.6	2066.75	1920.8	1039.8
ACGGACGTAAAGTCATGTAC	Standard	YNL252C::chr00_8:dntag	65.2	55.8	66.8	62.8	69	71	68.2	70.4	55.8
ACGGACTGAAAGTGATCTAC	Standard	YMR267W::chr13_5:uptag	65.2	62.2	70.2	74	74.8	84.8	75.8	80.2	55
ACGGAGAAATAGACTTCCCT	Standard	YLR090W::chr12_2:uptag	2549.25	2482.4	3323.6	3281.8	2908.2	3561.2	3401.2	3353	1520.2
ACGGAGAGAAATCAGCCCTC	Standard	YBR259W::chr2_4:dntag	706.8	669.6	1203.8	1070.6	875.4	1483.2	1094.4	1104.4	592.2
ACGGAGCTAAAGTCCTACAC	Standard	YMR268C::chr13_5:uptag	72	70.8	72.6	83.6	69.6	86	82	76.4	58.4
ACGGAGTAACACTGAGTACC	Standard	YMR269W::chr13_5:uptag	457.4	528.2	371.2	601.2	495.6	484.6	325.6	427.6	239.4
ACGGATACAACAGGATCGCC	Standard	YMR270C::chr13_5:uptag	84.4	87.75	111.8	99.6	89	106.8	109.2	104.8	58.6
ACGGATCAAAGTAGACCCG	Standard	YIL110W::chr9_2:uptag	898	871.8	1355.4	1935.4	1194.6	1950.8	1364.2	1395.4	678.8
ACGGATCGAAAGGTATAGCC	Standard	YMR309C::chr13_5:uptag	72.6	71.8	82.8	82.4	78.6	93.4	84.6	93.6	56.2
ACGGCACAACCACGAAGTGT	Standard	YMR310C::chr13_5:uptag	539.8	580.8	1101.4	1103.8	1096.4	1080.6	834	979.6	544.4
ACGGCAGAACAACCGGAGTT	Standard	YLR091W::chr12_2:uptag	116.6	94.4	180.2	137.8	93.4	269	174.4	170.6	79.4
ACGGCAGTAAACAGATGTCC	Standard	YMR311C::chr00_8:uptag	83.8	72.2	92.25	85.6	70.8	108.6	118.25	96.6	56.4
ACGGCATCAAAGTTGCATAC	Standard	YBR260C::chr2_4:dntag	1722	1905.4	2965.6	3035.2	2872.6	3372.4	3068.8	3307.6	2463.2
ACGGCCTAACAATTAAGCCT	Standard	YGR085C::chr7_4:dntag	257.4	189.8	272	269.6	252.2	344.2	215	310	177.6
ACGGCGAGAAATACGATGCC	Standard	YMR312W::chr00_8:uptag	1063.5	1392.2	1057.6	907.4	1090.8	1687.6	1066.6	1166	615.4
ACGGCGATAAGTCTATGAC	Standard	YMR264W::chr13_5:dntag	2842.4	2572.75	3215	3428.4	3418.2	3472.8	3300.6	3297	2553.8
ACGGCTGCAAAGGCTCATAA	Standard	YLR174W::chr12_3:uptag	3090.75	2794.6	3268.25	3375.4	3341.6	2857.8	3531.8	3528	1321.4
ACGGCTTGAAAGGGACATAC	Standard	YBR261C::chr2_4:dntag	1278	1096.8	1676.4	1528.8	1332	1948.2	1437.8	1696.2	850.8
ACGGGAAAGTCCATCAACCG	Standard	YDR005C::chr4_3:uptag	310.4	559.667	497	552.2	277.4	969.4	527.2	922.4	263.2
ACGGGAAGAAACGTCATGCC	Standard	YBR262C::chr2_4:dntag	56.2	58	74.2	73	65.4	79.4	78.4	69.6	57
ACGGGATAACAACGCAGCCT	Standard	YLR092W::chr12_2:uptag	302.4	172.2	510.2	375.6	233.4	616	499.2	472.2	166.8
ACGGGCTCAAAGTATGATAA	Standard	YMR266W::chr13_5:dntag	52.4	57	56.4	63.6	52	62	63.4	60.4	53
ACGGGTGAACACATATTCCC	Standard	YBR263W::chr2_4:dntag	750.4	601	1930.5	1379.8	1565.4	1793.8	1706.2	1436.6	1129.6
ACGGTAAAGTAACTACGCCC	Standard	YMR307W::chr13_5:dntag	170.2	239.2	151	229.4	90.4	259.2	151.6	181.75	182.6
ACGGTAACACGCGCACAGAT	Standard	YMR308C::chr13_5:dntag	320.75	194	553.6	422	284.4	681.8	523	520.6	181.2
ACGGTAATAACAGAGCTGCC	Standard	YMR309C::chr13_5:dntag	85.2	77.8	104.25	102.6	93.2	141.2	137	122.8	70.8
ACGGTATAAAGTTGTACGC	Standard	YMR267W::chr13_5:dntag	75.6	60.8	71.6	71.2	69.8	72.2	74	72.4	53.6
ACGGTATGAAATAGCACTCC	Standard	YMR310C::chr13_5:dntag	1704.6	1846.2	2748.2	2858.8	2882	2691.8	2570.8	2505.4	1995.8
ACGGTCAAATAATTGCACCC	Standard	YDR476C::chr4_8:dntag	178.4	164.2	311.2	340	202.2	355.4	256.6	380.2	322.2
ACGGTCACAAACAGGTACGC	Standard	YJL192C::chr10_1:uptag	464.4	546	866.2	835.8	810	864	849.8	723.8	281.8
ACGGTCTAACACGCCTTAAT	Standard	YJL191W::chr10_1:uptag	153.5	90.25	212.8	150.8	98.6	268	186.5	207.8	85.4
ACGGTCTCAAAGTCGAAGAG	Standard	YJL190C::chr10_1:uptag	1929	1955.25	2102.6	2153.8	1785	2474.2	2239.4	2661.8	1167.2
ACGGTGAGACAACATACCTC	Standard	YJL189W::chr10_1:uptag	91.8	75.6	98	93.2	87.2	100.4	99.2	90.6	64.8
ACGGTGCCAAAGTGCGATAA	Standard	YNL091W::chr00_16b:uptag	203.5	178.2	259.6	245.6	211.8	293.4	279.6	270.4	132.2
ACGGTGTGAAAGTCGTATCA	Standard	YJL140W::chr10_1:uptag	98	91	147	126	108.4	168.4	163.6	143.2	126.6
ACGGTTACAAATAGAGTGCC	Standard	YJL139C::chr10_1:uptag	67	62.2	72.75	67.2	64.2	74.8	79.75	67.6	57.6
ACGGTTCTAAAGGATGTACC	Standard	YJL138C::chr10_1:uptag	2157.2	2175.6	1792.4	1981.4	1690.4	2853.4	1432.4	1908	1165.2
ACGGTTGGAAAGAACAGTCC	Standard	YBR264C::chr2_4:dntag	2117.2	1753.6	2271	2432.8	2162.6	2874.4	2359.8	2609.4	1923.8
ACGTAAAGACGCATACCCGG	Standard	YJL186W::chr10_1:dntag	1084	1347.2	1313	1262.4	1159.2	1563.6	1572.6	1216.2	1161.2
ACGTAACAATTATAGCCCGC	Standard	YJL185C::chr10_1:dntag	1817	1615	2387.8	2125	1885.6	2386.2	1785.4	1927.8	1509.6
ACGTAACCAACACTTCAGGG	Standard	YGR086C::chr00_14:dntag	86.4	101	110.8	101	89.4	125.4	116.5	110	61.2
ACGTAACTAAATTGACGCGC	Standard	YJL184W::chr10_1:dntag	53.6	50.6	64	62	58.8	66.6	65.8	69	48.4
ACGTAAGGTCCGGTAATCA	Standard	YPR200C::chr16_5:dntag	2525.4	2191.2	2085.2	2393.4	2211.8	2398.4	2379.8	2653.2	2219.2
ACGTAATTCAACGAACCGTC	Standard	YJL183W::chr10_1:dntag	108	150.6	93.8	96	143.4	127.2	116.6	148	64.8
ACGTACAAATACATCTCCGG	Standard	YJL134W::chr10_1:dntag	1463	1517.25	2045.4	1885	2016.6	2295.4	1836.4	1815.8	1694.8
ACGTACACAAATGACTCGCG	Standard	YJL133W::chr10_1:dntag	2038.6	1435.2	2612	2182.4	2294.4	2618.8	2682	2040.6	1593.4
ACGTACTAACAATGTGACCC	Standard	YJL132W::chr10_1:dntag	63.25	67.6	75	84.4	80.6	89.6	76.8	81.4	54.4
ACGTACTCAAACATTACCGG	Standard	YJL131C::chr10_1:dntag	2792.2	3031.75	3864.4	3844	3770.4	4364.2	3230.2	3873	3353.8
ACGTAGCGAAACATAGTGCC	Standard	YJL081C::chr10_2:uptag	68.2	67.4	71.8	74.6	71.2	81.8	79.2	79.6	61.6
ACGTAGCTCAACTAACAGCG	Standard	YJL080C::chr10_2:uptag	180.8	115.8	367.4	263.6	140.6	453.2	329.8	321.4	119.8
ACGTAGTAACAGCACAGCCT	Standard	YJL079C::chr10_2:uptag	364.5	265.6	701.75	508.6	371.6	754.8	589.75	593.5	212.4
ACGTCAACAGACAAGCCGTT	Standard	YGR087C::chr7_4:dntag	516.6	407.75	811.6	641.4	547.2	1074.4	679	772	395.8
ACGTCAGGAAACATCACGCG	Standard	YJL078C::chr00_15:uptag	82.8	68.2	82	81.8	90.8	86	88.6	86.8	53
ACGTCATAACAATCCTACGG	Standard	YJL128C::chr00_15:dntag	1083	1052.5	1077.2	864.4	927	1000.2	949.2	1067.2	853.2
ACGTCCAGAAACAGTATCCG	Standard	YJL127C::chr10_2:dntag	97.8	78.8	150	114.6	82.2	192.2	137.4	137.4	75
ACGTCCCGAAAGTCCTTAGA	Standard	YJL126W::chr10_2:dntag	2704.25	2720	3615.8	3537.8	3602.6	3684.6	3674.2	3805.6	3169.4
ACGTCCTCAAGTGCAGACA	Standard	YJL125C::chr00_15:dntag	85.4	89	137	109.4	94	137	124	123.2	72.6
ACGTCGCGCAACTAACGAGA	Standard	YJL074C::chr10_2:dntag	92.4	80.6	117.6	112.4	93.2	110.4	119.4	112.2	74.6
ACGTCTCTAAATAGTACCCG	Standard	YJL073W::chr10_2:dntag	2490	2485.25	2769.4	3210.4	2955.2	3075.4	3062.4	2762.4	2621.2
ACGTCTGAACACTCATTACG	Standard	YJL072C::chr10_2:dntag	64.25	72	80.2	80.2	76.6	79.4	84	85.6	59.8
ACGTGAACAATTCCACACTG	Standard	YIL008W::chr9_1:uptag	140	95	247.2	155.4	108.2	302.2	233.4	260.4	105.2
ACGTGAGAACAATTCATCCC	Standard	YBR265W::chr2_4:dntag	58.2	57	63.6	60.4	59.8	68.4	64.6	68.4	52.4
ACGTGCCTAAAGTGTACTAC	Standard	YIL009W::chr9_1:uptag	3535	3482.2	3802.6	3694	4077	4269	3971.4	3948.4	1971.4
ACGTGCGAACACTCCGAGAA	Standard	YIL010W::chr9_1:uptag	2136.6	2354.4	3582.6	3937	3554.6	3722.4	3547.2	3210	1555.2
ACGTGCTGAAAGTGCGTACA	Standard	YIL011W::chr9_1:uptag	1480.25	1437.2	2113.4	1876.6	1891.2	2262.6	1869.2	2239.6	865.4
ACGTGGAAAGGCGCACAACT	Standard	YLR093C::chr12_2:uptag	1756.2	1838	2223.2	2242.4	2115.2	2496.8	2694.4	2533	1040.6
ACGTGGAGAAACATCCCAGC	Standard	YGR088W::chr7_4:dntag	1556	1422.2	2385.75	2155.4	2328	2473.6	2108.6	2301.4	1577.6
ACGTGGCCCAACCAAGTAGA	Standard	YNL090W::chr00_16b:uptag	344.4	253	543.6	432.8	296.2	664.2	489.25	521.8	268.4
ACGTGTGAACAGACGAGACC	Standard	YIL059C::chr9_1:uptag	339.2	223.8	576	445.6	368.6	718	542.25	571.4	188
ACGTGTGTAAACAAACCGCC	Standard	YIL060W::chr9_1:uptag	3684	3653.4	4379	4412.8	3934.6	4840.2	4131	4338.4	2470.2
ACGTGTTAAGACCCAAGACC	Standard	YIL061C::chr9_1:uptag	88.6	82.2	154.4	137.8	94.4	220.6	172.2	154.4	73.6
ACGTTAAGACCGAAGACCCG	Standard	YGR089W::chr00_14:dntag	2215.75	2404.2	4027.2	2978.4	2672.4	3917.2	3510.6	3496.2	2930.4
ACGTTAATAAGAACTCGCCC	Standard	YIL013C::chr9_1:dntag	1977.6	1858.6	2865.8	2922.2	2949.4	3028.8	3385.8	2837	2423.6
ACGTTACTAAACCACACTGG	Standard	YIL014W::chr9_1:dntag	1555.5	1846	2104.2	2265.2	2174.2	2635.8	1891.4	2259	1178.2
ACGTTATACCACCAACTAGG	Standard	YIL015C-A::chr9_1:dntag	4540.75	4803.8	4378	4471.2	4516.2	4783.6	4039.2	4675.4	2624.4
ACGTTCGTAAATAAGAGGCC	Standard	YIL015W::chr9_1:dntag	60	62.4	71.8	72.2	65.4	81.8	79.2	69.2	57.6
ACGTTGAGACAAGAAGCGTT	Standard	YIL064W::chr9_1:dntag	2336.2	2101.2	3516.4	2914.8	2419.2	3366.4	2239	2452	2252
ACGTTGCACAGAAATACGCG	Standard	YGR090W::chr7_4:dntag	305.8	198.2	555.2	380.6	261.2	645	485.4	474.2	169.2
ACGTTGTGAAAGGTGTCATC	Standard	YIL065C::chr9_1:dntag	131.4	110.6	126.2	123	101	145.2	152.2	126	141.4
ACGTTTAACCCTCAAGAAGC	Standard	YBR266C::chr2_4:dntag	309	281.6	289.6	505.2	214.6	555.6	521.25	486.4	405.8
ACGTTTAATGTGAGCTACGA	Standard	YJL045W::chr10_2:dntag	644	676.8	1689.2	962.2	1131.2	1334.8	882.8	828	456
ACGTTTCGACACTAACAGAG	Standard	YIL066C::chr9_1:dntag	1328.2	1483.6	1828.2	1252.4	1669.6	2338.6	1552.6	1674.2	1113.8
ACGTTTGGAAATCAAGAGCC	Standard	YDR477W::chr4_8:dntag	461.4	663.2	623.5	536.8	568.4	910	1862.8	1438.2	1048.6
ACTAAAGGAACCACCGCTTG	Standard	YDR006C::chr4_3:uptag	1369.2	1420.4	1034.2	1134.2	857.8	1374.2	988	1262.8	559.4
ACTAAATGAACACTCCCTGG	Standard	YDR007W::chr00_16b:uptag	784	1136.8	652.2	779.6	686	1005.8	573.2	1045.2	295
ACTAACACTGATGAACCCGG	Standard	YGR091W::chr7_4:dntag	64.8	56.6	71.8	64.4	68	69.8	72.6	68	56.2
ACTAACCTAAATCACTGCGG	Standard	YEL017W::chr5_2:dntag	1959.6	1676	1467.4	1353.6	1225.2	1507.6	1588.8	1439.2	586.2
ACTAACGAACACTTATCGCG	Standard	YEL018W::chr5_2:dntag	67.4	65.2	70.4	78.2	69.8	77.4	83.8	74.4	54.4
ACTAAGCGAAATCACGTTCC	Standard	YEL019C::chr5_2:dntag	71.2	70.2	81.8	72.6	76.6	88	88.2	84.8	57.4
ACTAAGTTAAATTCGGGCCG	Standard	YDR008C::chr4_3:uptag	56.4	57.4	65.5	67.4	61	69	86.25	81.8	47.2
ACTAATAACAGGACGGCCTC	Standard	YEL020C::chr5_2:dntag	305	277	287.8	468.75	402.2	462.6	428.5	404.6	306.4
ACTAATATAACAGCGTCGCC	Standard	YEL067C::chr5_2:dntag	376	284.4	889.4	527.4	429.6	595.2	505.8	593	259.6
ACTACAATAACATCGCGTCG	Standard	YEL068C::chr5_2:dntag	763.2	803.8	1241.4	899.4	808.8	1300.2	1045.4	1343.4	965
ACTACACAACAGCTACGGGT	Standard	YDL227C::ctrl_28:uptag	558	547.6	427.2	463	468.2	474.6	402.2	443.6	418.4
ACTACGCTAAATCACGACGG	Standard	YLL025W::chr12_1:uptag	1519.8	1571.4	1940	2046	2080	2245.6	2535.2	2227.2	740.8
ACTACGGGAAATCACACTCG	Standard	YLL026W::chr12_1:uptag	1259.4	1408.4	1641.4	1728.8	2136.4	1957.4	2219	1942.4	587
ACTACTCGAAAGTCGGATAC	Standard	YLL027W::chr12_1:uptag	87.2	78.4	93.8	86.4	84.8	257	112.2	91.2	66.2
ACTACTTAACAGAATCGCGC	Standard	YLL028W::chr12_1:uptag	2423	2564.6	3065.8	3745.6	3587.8	3298.8	3838.8	3075.4	1267.2
ACTACTTGAAATCATCCGCG	Standard	YLR010C::chr12_1:uptag	65.4	68.2	79	87.8	75.2	86.4	80.25	84	57
ACTAGACTAAATTCGACCCG	Standard	YLR011W::chr12_1:uptag	2975.5	2943	3088	3255.8	3426	3549.2	4106.8	3782.2	2087
ACTAGAGGAAATGCACGGCC	Standard	YBR267W::chr2_4:dntag	253.4	157.5	457	323.2	235	570.8	402.8	431	175.8
ACTAGATAACAGATGCGCCG	Standard	YLR012C::chr12_1:uptag	256	251.4	480.8	583.5	670	538.6	548.8	516.4	182.6
ACTAGCCGAAAGTGCAGGAC	Standard	YLR013W::chr12_1:uptag	1325	1198.8	2609.4	2317	2361.6	2519.8	2627.8	2328.2	1084.8
ACTAGCGCAAAGTATGGACC	Standard	YLL033W::chr12_1:dntag	58.2	53.2	66	67.2	63.4	76.2	68.4	79	54.2
ACTAGGAAATATAGGGCCGC	Standard	YBR268W::chr2_4:dntag	62.8	59	62.2	63.4	56.2	64.2	67.2	64	52
ACTAGGGTAAAGTGCGTCAA	Standard	YLL034C::chr12_1:dntag	60.4	63.2	77.2	79.5	78	91.6	81.4	87	53.2
ACTATAAACACTCACCGTGG	Standard	YGR092W::chr00_14:dntag	1501.2	531.4	1802.4	725.4	1410.6	877.6	1838.4	1043.4	1130.8
ACTATACAACAGTCACGCGG	Standard	YLL035W::chr12_1:dntag	297.2	168.4	538	378.4	238	608.2	490.2	491.4	181.2
ACTATACTAACAGCACGTCG	Standard	YLL036C::chr12_1:dntag	336	191.8	558.6	382.6	261.2	630.2	516.4	465	174.8
ACTATATCACAACAGGCGTG	Standard	YLR018C::chr12_1:dntag	79.8	76.5	191	133.5	88.2	217.8	190.4	153.2	66.2
ACTATCAAATATGACCCGCG	Standard	YLR019W::chr12_1:dntag	63.6	62.75	69.4	69.4	66.6	74.4	79.8	75.4	53.4
ACTATCACAAATTCACGGCG	Standard	YLR020C::chr12_1:dntag	326	260.75	695.6	537.8	461.8	815.6	589.6	664.2	202.4
ACTATCGGAAATCACTACCG	Standard	YLR021W::chr12_1:dntag	77.4	74	96	94.4	89.6	106.4	102.2	97.6	60.8
ACTATCTAACAGACAGTCCG	Standard	YOR328W::chr15_4:uptag	415	357	911.2	722	570	1008	941.4	881	404
ACTATGATAACAGCAGCCCG	Standard	YOR329C::chr15_4:uptag	365.8	228.75	707.4	498	352	790.2	688	621.2	206.4
ACTATGGCAAATCACCCAGG	Standard	YGL118C::chr7_2:uptag	114.2	85	347.25	191.6	100.6	384.6	293.8	269.6	85.2
ACTATTATACACTACCGGCG	Standard	YOR330C::chr15_4:uptag	73.2	68.4	82.4	82	81.8	82.8	87.8	76.6	56.2
ACTATTCGACAATTACGGCG	Standard	YOR331C::chr15_4:uptag	61.2	61.4	61	67.6	66	71.4	65.6	63	51.2
ACTATTGAACACGGACACCG	Standard	YOR379C::chr15_4:uptag	1389.75	1340	976.6	917.4	737.4	1333.6	1745.4	1798.4	908
ACTATTTGAAAGTCGGTGCC	Standard	YCL001W::chr3_1:uptag	448.25	502.8	826.25	687	501	1122.4	1065.8	814	470.2
ACTCAACGAAGACACCGGGT	Standard	YOR380W::chr15_4:uptag	4024.5	3662.6	5612.4	4687.4	4612.8	5952.2	5164.8	5154.4	2083.2
ACTCACATAAATTGCAGCCG	Standard	YDR009W::chr4_3:uptag	397.8	295.8	676.4	534.6	375.4	746.8	683	651	264
ACTCACCAACAGGAGCAGGT	Standard	YLR094C::chr12_2:uptag	192	184	347.4	310.4	285.4	385.6	277	329.2	184
ACTCACCGAAATCAGTACGG	Standard	YOR381W::chr15_4:uptag	2892	3192	3572.2	3017.2	2533.8	3924	3679.8	3614	2129.4
ACTCACGCAAATGAACGGCG	Standard	YOR382W::chr15_4:uptag	2543.8	2738.25	4318.6	3204	2776.6	4563.2	3907.4	4060	2012.4
ACTCACGTAAAGTGCTCACA	Standard	YOR335C::chr15_4:dntag	65.6	66.6	79	82	76.8	78	84.2	78.8	61.8
ACTCAGAAATATACGTCCGC	Standard	YOR336W::chr15_4:dntag	54	58.4	66.2	62.2	59.6	73.6	71.6	69.2	51.6
ACTCAGCTAAAGTGGTAGAC	Standard	YOR337W::chr15_4:dntag	469.8	471.8	636.6	788.4	680.8	880.6	814	955.2	662.6
ACTCAGGTAAATCATAGGCC	Standard	YCL002C::chr3_1:uptag	93.25	72	92.2	84.2	84.2	89	90	85.2	60.8
ACTCCAATAACAGGTACTCG	Standard	YOR338W::chr15_4:dntag	158.2	180.8	311.6	317.2	261.6	407.8	324	268	232
ACTCCACAACAGGGAATCGG	Standard	YDR010C::chr4_3:uptag	329.6	349.2	557.8	526.4	488.4	676.4	502	538.2	245.4
ACTCCACGAAACATGATTGC	Standard	YCL003W::chr3_1:uptag	65	65.4	71.2	77.8	75.2	85.8	87.4	87	61.6
ACTCCAGTAAATCACGTAGC	Standard	YOR383C::chr15_4:dntag	1878.75	1660.8	2229.6	1868.6	1684.2	2364.2	2429.8	2345	1987.8
ACTCCATCAAATCACTAGGG	Standard	YDR011W::chr4_3:uptag	2390.8	2528.25	2493.75	2628.6	2407.8	2577.4	2516.75	2432.6	1316.6
ACTCCGAAATAGAGGACCCT	Standard	YLR095C::chr12_2:uptag	2444	2361.2	2737.2	2460	2904.6	3006.6	3067.2	2819.8	1267
ACTCCGACAAATCATAGTGC	Standard	YOR384W::chr15_5:uptag	1068	1095.4	1201	1182.6	830.2	1632.6	1380.2	1544.2	990.4
ACTCCGTAACACTCTTAGGA	Standard	YOR385W::chr15_5:uptag	3173.5	3296.6	2963.6	2930	2834	3137.8	3246.4	3331.2	1944.8
ACTCCTAAATATCAAGCCGG	Standard	YDR013W::chr4_3:uptag	130	83.6	242	140.6	102	279.8	232.6	208	73.6
ACTCCTAGAAACAGGCATCG	Standard	YOR386W::chr15_5:uptag	357.6	383.8	406.2	384.6	382.8	491.6	412.6	475.8	212.4
ACTCCTCGAAAGCGTTGACA	Standard	YOL036W::chr15_5:uptag	2474.5	2300.8	2481	3066.2	2563.6	3420	2922.2	2674.4	1490.8
ACTCGAACACCTTACAAGTG	Standard	YGR093W::chr00_14:dntag	80.8	79.2	91	84.4	86.2	96.6	92.25	92.8	66.2
ACTCGAATAACAGCATCTCG	Standard	YOL037C::chr15_5:uptag	1028.2	953.6	1293.2	1317.6	1245	1641.4	1036.4	1262	575.4
ACTCGACAACATAAGCCTGG	Standard	YOL038W::chr15_5:uptag	145.2	102.4	299	162.6	127	331.2	257	248.8	95.4
ACTCGACTAAATGCAACCGG	Standard	YOL039W::chr15_5:uptag	3000.2	3203.4	3323	4053	3641.2	3887.8	4131	3884.8	1854.4
ACTCGATGAAAGTTGCGACA	Standard	YOL084W::chr15_5:uptag	1959.4	2020.4	3030	2582	2489.6	2974.8	2984.25	2638.8	1750.8
ACTCGCATAAACGACAGTCT	Standard	YOL085C::chr15_5:uptag	455.75	440.4	728.8	721.4	655.2	889.6	637.4	658.8	277.8
ACTCGCTTAAAGTTCATCCG	Standard	YOR384W::chr15_5:dntag	2074.4	1972.8	2590	2523.8	1708.2	3657.8	2979.6	3383.8	2889.8
ACTCGGAGACAACCGTAGAG	Standard	YOR385W::chr15_5:dntag	2794.4	3019	2968.2	2891.6	2607.8	3515.6	2947.4	3681.6	2651.2
ACTCGGCGAAAGTGTCGATA	Standard	YOL036W::chr15_5:dntag	481.2	532.8	488.5	630.6	442.2	818.2	539.4	502.4	449.6
ACTCGGGAACACGCTCAGAT	Standard	YOL037C::chr15_5:dntag	564.2	543.8	945.5	965.8	913	1215.8	740.8	929.8	425.2
ACTCGTCTAAAGGTGTAGCA	Standard	YOL038W::chr15_5:dntag	95.5	87.5	101	112	104.4	110.6	106.6	106.8	68.4
ACTCGTGGAAAGTTAGGTAC	Standard	YOL039W::chr15_5:dntag	2355.6	2240.6	2495	3133.2	2588.4	3121.2	3180.2	3246.2	2220.6
ACTCTAACAGAATACCGGGT	Standard	YGR095C::chr7_4:dntag	81.75	76	103.6	96.25	83.8	110.6	110.8	92	58.8
ACTCTAATCAACATCGGCG	Standard	YGR094W::chr7_4:dntag	77.2	63.4	109.4	75.8	71	93.8	102.2	98	63.8
ACTCTAGTAAACGACGACGC	Standard	YOL084W::chr15_5:dntag	4073.4	4164.4	5172.8	4237	3887.8	5233.2	5016.4	4741.4	3306.2
ACTCTATCAAACGAGATCCG	Standard	YOL085C::chr15_5:dntag	1015.2	874.5	1449.2	1558.2	1047.2	1654.2	1204.4	1330.4	1057.4
ACTCTCAGACAAGAATCCGG	Standard	YOR001W::chr15_1:uptag	352	1066.2	694.4	1470.4	706	1579.6	431	1779.2	128.8
ACTCTCGAACACTATTGACG	Standard	YOR002W::chr15_1:uptag	2406.25	2086.8	3311.75	2899.6	2659.6	3603.6	3028	3020.8	1233
ACTCTGATAAATCCGACACG	Standard	YOR051C::chr15_1:uptag	2157.4	2312	2539	2646.8	2524.4	2213.4	2713.5	2357.6	1334
ACTCTGTAACACGTTTAGCC	Standard	YOR052C::chr15_1:uptag	3285.5	3563.2	3457.2	3984	3688.6	3993.4	3839.8	4122	2274
ACTCTGTGAAAGTGGGTTAC	Standard	YOR053W::chr15_1:uptag	3234.25	2774.8	3234	3752.6	3440.2	3982	3683	4015.8	2160.8
ACTCTTAGAAATAGCAGGCC	Standard	YCL004W::chr3_1:uptag	96.2	75.6	102.5	98.2	92.2	117.8	122.4	94.8	64.4
ACTCTTCAACACTTCTAGGG	Standard	YOR054C::chr15_1:uptag	2174.75	2087.8	1994.4	2251.2	1977.8	1832.8	2769.4	1985.4	1044
ACTCTTCCAAAGGTTCAGAC	Standard	YCL005W::chr3_1:uptag	90.4	91.4	117.5	103.8	97	144.6	136.6	117.8	77.4
ACTGAAGAACAGGTAGGCTC	Standard	YOR007C::chr15_1:dntag	87.6	91	124	119.4	108.4	118	110.25	96.8	68.8
ACTGAAGTAACAGCCACCGG	Standard	YGR097W::chr7_4:dntag	343.4	229.2	675	487.4	326.4	781.8	674.8	586.6	218.6
ACTGAAGTTGGAGAACCCT	Standard	YGR096W::chr7_4:dntag	2214.2	1854.6	2249	2071.8	1430.6	2634.4	2259.8	2520.8	1578.4
ACTGACAAATCGAGCACCGG	Standard	YGR098C::chr7_4:dntag	105.4	112	125.2	133.6	117.6	121.8	154.2	127.4	104.4
ACTGACATAACATACGGTCC	Standard	YOR008C::chr15_1:dntag	555.2	541.2	953.2	826	787.2	934.8	967.4	1027.4	405.8
ACTGACTAACAGCTAATCCG	Standard	YOR009W::chr15_1:dntag	307.8	278.8	493.2	442.4	320	652	487.4	536	253
ACTGACTCAAATCGACGACG	Standard	YOR010C::chr15_1:dntag	1168.2	881.6	1333	1484.2	1558.6	1573.2	1179.2	1399	1546.2
ACTGAGACAAGCAAGCCGCT	Standard	YGR099W::chr7_4:dntag	274.4	172.2	481.2	351	232.2	589	455.5	451.4	161.8
ACTGATGTAAATCCACACCG	Standard	YOR058C::chr15_1:dntag	233	150.4	432.8	293.2	174.4	529.8	415	419	143.4
ACTGCAAACAACGGGACGT	Standard	YOR061W::chr15_1:dntag	1722.6	1912.6	3338.8	3127.6	2956	2887.2	2424.8	2755.8	1834.8
ACTGCAACACCTGCTAAGAG	Standard	YOR059C::chr15_1:dntag	2310.2	2487.2	3391.8	3388.4	3655.8	3601.2	2820.4	2863.6	2514.2
ACTGCAATAACATATCCGCG	Standard	YOR060C::chr15_1:dntag	65.8	60.4	73	69.8	66.6	87.8	78.4	75.2	56.2
ACTGCACGAAATCGACATCG	Standard	YHR058C::chr00_10:uptag	66.4	60.6	79.6	75.2	73.2	79	82.6	75.2	53
ACTGCATGAAAGTGTCTACC	Standard	YHR059W::chr00_10:uptag	3503.4	2346.2	3611.2	2539.2	3469	2774.8	3855.6	2484.2	1997.6
ACTGCCCTAAATAGAAGTCC	Standard	YCL006C::chr3_1/chr00_12:uptag	3143.2	2882	3628.6	3218.6	3308	3644	3949.2	3748	1810.6
ACTGCCGAACACTTCTGAAT	Standard	YLR096W::chr12_2:uptag	1403.6	1398.2	1709.2	2118.8	1625.6	1596.8	1897.75	1932.4	632
ACTGCCGCAAAGGTTGATAA	Standard	YLR175W::chr12_3:uptag	90	90.2	107.25	96.4	83.6	122	110.75	113.4	67.4
ACTGCGCGAAAGTTGGTACA	Standard	YHR060W::chr8_2:uptag	58.8	56.6	67	69.2	64.2	77.6	70	73.8	52
ACTGCGTAACACTGGCGAAC	Standard	YHR061C::chr8_2:uptag	3228.2	2995.2	3813.2	4602.4	4260.4	4064.4	4151.4	4021.6	1941.2
ACTGCTAAATACACTACGCG	Standard	YHR109W::chr8_2:uptag	72.2	71	82.4	76.6	82.2	85.6	93.4	84	56.4
ACTGCTAGACAACGACCAGG	Standard	YHR110W::chr8_2:uptag	282.5	219.2	503.4	371.8	255.4	583.4	437	414.6	166.6
ACTGCTCCAAATAGATACCG	Standard	YHR111W::chr8_2:uptag	620	624.6	741.25	653.8	457.4	997.8	506.6	747.8	360.6
ACTGCTCTAAACTCTTCAGG	Standard	YHR112C::chr8_2:uptag	870.5	753	1118.2	990.8	1336.8	1223.6	1124	1077.6	388.6
ACTGCTTTACCTGCAAGAC	Standard	YCL007C::chr3_1:uptag	65	61.75	85.6	73.8	64.6	90.4	85.8	81.6	55.4
ACTGGACTAAACTCAACTCG	Standard	YHR065C::chr8_2:dntag	71.4	69.6	81.6	83.6	83.8	87.8	90.4	82.6	65
ACTGGAGAACAGAGACTCGC	Standard	YHR066W::chr8_2:dntag	541.6	874.4	807	1364.6	959	1470.8	1121.2	1151.2	344.8
ACTGGCCCACAGAACGAGAT	Standard	YLR097C::chr12_2:uptag	351.4	277.4	631.8	502.4	367	722.6	594.25	570.4	279.8
ACTGGCCTAAAGCCGCGATA	Standard	YNL089C::chr14_3:uptag	1140.8	1370.8	1652.6	1372.8	1089.4	1831	1414.5	1266.6	579.6
ACTGGCTCAAATATCGAGAC	Standard	YGR201C::chr00_10:dntag	1907.2	1589.8	2653.2	2045	1806.8	2459.8	2148.8	2058.2	2315.8
ACTGGGCCAAAGGCGTATAA	Standard	YLR176C::chr12_3:uptag	2558	2819.8	2335	3052.4	3367.8	2591.8	2333.8	3560.8	1513.4
ACTGGTGAACACGGTTTACA	Standard	YHR116W::chr8_2:dntag	620	910.8	1162.5	1522.8	1360	1423.4	1206.8	1394.6	522.4
ACTGGTGCAAAGTCTTCGAC	Standard	YHR117W::chr8_2:dntag	1139.6	1194.8	2167.4	1736.6	2107.8	2072.8	1885.8	1304.8	1001.4
ACTGTAAATCCCACCAAGGG	Standard	YGR100W::chr7_4:dntag	382.8	313.8	682	406.2	371.6	679.8	546.6	568.6	343
ACTGTAACACTCGTCAAGAC	Standard	YHR118C::chr8_2:dntag	55.6	57	77.6	58.4	53.6	73.6	72.2	76.4	47.8
ACTGTAATAACCAAGCCTCG	Standard	YHL039W::chr00_10:dntag	283.4	167.4	535.6	370.2	226.4	615.4	493	465.6	172.6
ACTGTACCACACAAGCAGGG	Standard	YBR292C::chr00_1:uptag	386.4	335.2	808	657	443.4	844.8	692.75	704	354.8
ACTGTACGAAACGAGATGCC	Standard	YBR293W::chr00_1:uptag	410.25	505.4	854	814	629.6	885.6	804.6	829.8	401.6
ACTGTAGAACATAAGCGCCG	Standard	YBR294W::chr00_16a:uptag	1256.75	1196.75	3080.4	1860	1755.8	3077.4	2465	2396.2	1662.4
ACTGTAGGAAATCATCGACC	Standard	YBR295W::chr00_1:uptag	603.8	516.6	1004.8	937.4	832.8	1185.6	1145.2	1078.2	508
ACTGTCGCAAATATCACACG	Standard	YCR072C::chr00_16a:uptag	67.4	70	88.8	84.6	68.6	94.8	94	77	57.2
ACTGTCTAACACTGTATCCG	Standard	YCR073C::chr00_16a:uptag	2699	2490.25	2747.6	3350.2	2482.4	3225.8	3316	3087.4	1594
ACTGTCTGACCAACCAATAG	Standard	YCR073W-A::chr00_1:uptag	2823.6	2420.4	3456.8	3668	3435.8	3425.8	3979	3968.8	1884
ACTGTGCGAAATCCCAGACA	Standard	YNL088W::chr14_3:uptag	181.2	112.2	353.4	236.2	139.8	448.8	308.2	334	115.2
ACTGTGGAACACTGCCCAAG	Standard	YDR014W::chr4_3:uptag	1123.5	1426	1940.2	1471.8	1069.8	1936.6	1589.6	1588.6	614.8
ACTGTTCTAAACGGTTGACC	Standard	YCR075C::chr00_16a:uptag	3414.6	3045.8	3799	4029.2	3793.4	3730.2	4748.2	4354.8	2062.8
ACTGTTGCACACTTAACCAG	Standard	YBR301W::chr00_16a:dntag	1709.8	2026.2	3365.4	2828.8	2259.4	3320.4	2878.75	3056.6	2457.4
ACTTAAATCTCAACACGGC	Standard	YGR101W::chr7_4:dntag	381.4	261.4	474.8	466	342.6	579	476.75	590.6	492.6
ACTTAATAACAGTGACGCCG	Standard	YCL001W-A::chr00_1:dntag	123.4	149.2	393	301.25	279.8	322.4	283.4	285.8	210.2
ACTTACAAATGAAGCGCCCT	Standard	YDR149C::chr4_5:dntag	648	604.2	674.6	1427.8	749.8	1582.2	1559	1509	865
ACTTACACAACATCAGGCGG	Standard	YCL026C-A::chr00_16a:dntag	553.2	505.6	1130	1207.8	1216.8	1242.2	1265.5	1091.2	602.4
ACTTACGAACAATCTCAGCG	Standard	YCR020W-B::chr00_1:dntag	86.2	73.2	120	90.8	76	140.6	141	110.6	67.2
ACTTACGCAAATCTACACGG	Standard	YCR089W::chr00_16a:dntag	740	900.8	1860	1679.6	1630	2189.4	1816.4	2243.6	1022.6
ACTTACGTCAAGACAACTCG	Standard	YPL187W::chr16_2:uptag	3737.25	3350.25	4245.8	3623.6	3239.6	4604.4	4429.4	4217.2	2491.4
ACTTACTAACATACACCGGG	Standard	YPL185W::chr16_2:uptag	1458	1312	1747.4	1468.25	1494.4	1921.4	1651	1409.8	671
ACTTAGAAATCGAGCGACCC	Standard	YPL186C::chr16_2:uptag	447.75	403.8	636.4	533.4	482	725.2	490	536.6	297.2
ACTTAGCAACAGCCATACGG	Standard	YPL128C::chr16_2:uptag	354.4	210.4	661	471.6	326.8	727.2	630.8	577.6	200.4
ACTTAGCTCAAGAACCAGTC	Standard	YPL127C::chr16_2:uptag	680.8	585.4	1004.2	803.2	705.2	1026.8	728	879	602.4
ACTTATGAACAGCACGACCG	Standard	YPL126W::chr16_2:uptag	346.4	210.6	604	449.5	306.2	713.6	597.4	538.6	196.2
ACTTATTTAACGAGCACCCG	Standard	YPL125W::chr16_2:uptag	638.2	655	644	546.8	459.8	614.2	613.6	852	489.2
ACTTCAAATGATAACCGGCG	Standard	YDR015C::chr4_3:uptag	2452.4	2930.4	3260.25	3222.4	2875.2	2868	3216.5	3927	1921.2
ACTTCAAGAACATGACCTCG	Standard	YPL165C::chr16_2:dntag	1687.4	1860.4	2167	2324.4	2102.8	3038.8	2509.6	3092.8	2113.6
ACTTCATTAACATCGACGCG	Standard	YPL164C::chr16_2:dntag	1263.4	835.8	1896.4	1268	1461.8	1791.4	1968.8	1745.2	1362.8
ACTTCCAACTCGGAGGAGA	Standard	YNL121C::chr00_16b:dntag	1542.6	1592	1380	1791.2	1234.2	1893	1498	1868.6	1421.4
ACTTCCACAAACCAGGAGGG	Standard	YGL120C::chr7_2:uptag	292	205.6	599.2	410.2	279.75	666.6	539	494.4	176.8
ACTTCCATACAACCAGGAGT	Standard	YGR102C::chr7_4:dntag	176	111	382.8	249.4	144.6	409.6	389	326	99.6
ACTTCCCTAAACTTGTTCGG	Standard	YDR016C::chr4_3:uptag	82.2	60.6	67.5	64.8	65	90.6	90.8	84.2	61.6
ACTTCCGAAACGAACAGTC	Standard	YGR104C::chr7_4:dntag	76.4	71.8	79.2	75.8	66.2	95.8	94.6	85	57.2
ACTTCGACAGACAACTACGT	Standard	YPL163C::chr16_2:dntag	1124.2	1224.2	1746.8	1473.4	1206.2	1840	1886.6	2077.6	1292.4
ACTTCGCCAAATATCTTCGG	Standard	YDR017C::chr4_3:uptag	65.2	62.4	83.25	70.2	59.4	93.6	88.2	71.2	52
ACTTCGGGAAGGGACCACA	Standard	YLR177W::chr12_3:uptag	269.8	246.2	409.4	285.8	235.8	568.8	363.5	421.8	172.4
ACTTCGTTAAATCCGTACCG	Standard	YPL162C::chr16_2:dntag	1014	778	1031.25	1096.4	1390	1208.6	1191	1363.6	572.2
ACTTCTAGCAAGACAACGTC	Standard	YPL108W::chr16_2:dntag	177	158.2	293.6	232.8	173.6	319	296.4	317.8	241.4
ACTTCTCAACAGATAAGCGC	Standard	YPL107W::chr16_2:dntag	201.75	141.4	399.8	266.2	176	466.4	352.2	361.8	123.4
ACTTCTGTAAATCGCAGCAC	Standard	YPL106C::chr16_2:dntag	219.2	144.4	357.75	265	191.6	427.6	330	346.6	130.2
ACTTGAAATGAGAAGCCCGT	Standard	YDR150W::chr4_5:dntag	2096.6	1623.8	2364	2105.2	2112	2435.6	2577.6	2614	1421.8
ACTTGAACACTCCCAATGG	Standard	YGR103W::chr7_4:dntag	65	51.6	56	57.6	53.2	75.2	61.2	68.8	47.8
ACTTGAGGAAACCAGATTCG	Standard	YDR018C::chr4_3:uptag	2858	2931	2984.6	3022.6	2612.2	2987.4	3076.4	3595	1523
ACTTGCACAGCACAATACGT	Standard	YPL105C::chr16_2:dntag	351	208.4	619.8	419.4	307.2	654	550	517.6	191.4
ACTTGCCTAAATCCTAACGG	Standard	YDR019C::chr4_3:uptag	3512.6	3506.4	3482.75	3631.4	2923.6	3534.8	3882.4	3891.4	1981.6
ACTTGCGAACAGACGTACAC	Standard	YNL200C::chr14_2:uptag	1505.2	1457	2377	2558.6	2272.2	2334.4	2370.8	2374.4	1085.2
ACTTGGATACAACCACATCG	Standard	YNL199C::chr14_2:uptag	250.8	189.4	470	359.6	191.8	598.2	438.2	447.2	133.2
ACTTGGGAACAAATTGAGCC	Standard	YGR105W::chr7_4:dntag	561.6	86	51	62.8	50.6	65.2	53.8	64.8	49.2
ACTTGGTGAAACAACGCTAC	Standard	YGR106C::chr00_14:dntag	821.4	729	1845	1675	1118.4	1708.8	1625.8	1737.4	883.4
ACTTGTAGAGAACGAACGCT	Standard	YNL198C::chr14_2:uptag	233	440.4	180.8	383.4	235.6	271	448	684	85.2
ACTTGTCAACATAACGACGG	Standard	YNL197C::chr14_2:uptag	63.2	60.5	83.6	74.6	78.2	91.6	86.2	96.8	57.6
ACTTGTGCAAACTTCTGACC	Standard	YCL008C::chr3_1:uptag	63.2	56	65.3333	70.4	65.2	77	68.5	74.2	56.6
ACTTTAACGCAGAAGACCCT	Standard	YGR107W::chr7_4:dntag	650.6	581.25	1257.6	1381.6	1002.4	1311.6	836.4	1032.6	337.8
ACTTTAATAAGACACGGCCC	Standard	YCL009C::chr3_1:uptag	308.4	205.5	538.2	375.4	267.6	626.6	527.6	479.4	171.2
ACTTTACAACAGCCCGAGAG	Standard	YNL236W::chr14_2:dntag	318.6	206.6	609.8	415.8	301.6	668.4	575.2	511.4	177
ACTTTACCAAATGGAACGCC	Standard	YDR478W::chr4_8:dntag	57.5	55	66.2	65	57.8	73.4	70.4	73.4	48.6
ACTTTACGAAACCCAAGCGG	Standard	YDR020C::chr4_3:uptag	634.2	640.2	1125.2	1095.2	1129.2	1094	1043.6	1234.2	360
ACTTTATACCAATACGCGGC	Standard	YNL235C::chr14_2:dntag	69.5	82.25	81.8	74.6	67.4	90.2	90.8	83.8	58.2
ACTTTCTAACAGAGCAGACC	Standard	YNL234W::chr14_2:dntag	286.5	195.2	640.4	479	356.6	716	535.4	498.4	200.6
ACTTTGAACCAACCGACAGG	Standard	YDR021W::chr4_3:uptag	105.25	81.6	127	138.2	85.8	171.8	156.25	187	80.4
ACTTTGTGAAATCCCGATCC	Standard	YDR479C::chr4_8:dntag	2774.4	2722	2395.25	2407.8	2245.2	2818.2	2694.4	2904	1798.6
AGAAACAACGGTACGCCCTG	Standard	YGR108W::chr7_4:dntag	111	113.8	151.2	139.8	120.4	180	148.6	167.2	95.6
AGAAACGAACCAGCCCTGTG	Standard	YGR109C::chr7_4:dntag	575.5	399.2	928.5	678.8	552	1033.6	793	782.6	360
AGAAACGCAAATGCCTCTCG	Standard	YDR022C::chr4_3:uptag	2012.5	2365.4	3301.25	3097.8	2805	2887.4	3573	3226.8	983.4
AGAAAGTAATAGCCGCGCCG	Standard	YNL177C::chr14_2:dntag	210.2	106.2	366.6	277.6	152.6	486.2	360.8	408	139
AGAAATACGGACACCCGGCT	Standard	YLR098C::chr12_2:uptag	402.4	418.2	718.2	610	755.8	824.4	473.4	533.8	344.6
AGAAATAGGCCAGAATCCGC	Standard	YAL016W::chr00_12:uptag	267.333	172	506.4	350.8	220.8	590.6	497.4	466.4	165
AGAAATCAAGACTCCGTCGT	Standard	YNL233W::chr14_2:dntag	1405.2	1034	1756.4	1193.25	1001.6	1613.2	1539.2	1172.6	1282.4
AGAACAGGAACATCGCTGCC	Standard	YCL010C::chr3_1:uptag	612.8	721.8	1092.4	1044.4	977	1566.4	1228	1397.4	363.4
AGAACATACAAGCCTCTCGG	Standard	YGR110W::chr00_14:dntag	127.8	87.4	243.4	178.4	106.4	321.2	254	235.6	91.2
AGAACCAAGCAGACCGCTGT	Standard	YGR111W::chr7_4:dntag	602.8	508	722.6	561	489.4	951.8	648.75	622.4	267.8
AGAACCACAACTACCGTTTG	Standard	YNL176C::chr14_2:dntag	1531.2	1520.8	1708.4	2145	1890.6	2127.6	1314	1826.6	1328
AGAACCGGAACCAAGGTCCT	Standard	YDR151C::chr4_5:dntag	1869.8	1666.6	2609	2631	2110.2	3227	2542.6	2317.2	1430.6
AGAACGCAACATACTCTCGT	Standard	YDL227C::ctrl_39:uptag	45	47	54	50.8	47.8	58.2	52.8	51	42.2
AGAACGTAACAGCCGATCCG	Standard	YNL175C::chr14_2:dntag	467.2	385.75	902.2	697.8	770.6	1069.8	754.4	752.8	374.8
AGAACTACAACAGGCTCCTT	Standard	YGR112W::chr7_4:dntag	66.6	73.8	90.8	91.8	76.6	87.2	88.6	84.8	54.6
AGAACTGAACAGGAGGTCTC	Standard	YJR001W::chr00_13:uptag	182.4	204.2	419.6	497.2	411	440.2	363.5	307.2	141.8
AGAAGACAAGACCGTCGCGT	Standard	YJR002W::chr00_13:uptag	136	125.2	165.2	174.4	148.8	187	158.8	166.5	93.6
AGAAGATCAACAGCTCGTCC	Standard	YJR003C::chr00_17b:uptag	308.8	226.8	599.8	439.8	310	709	529	527.4	222.4
AGAAGCAACAGGACTTGGCC	Standard	YDR480W::chr4_8:dntag	796.8	866.4	1399.4	1183	1265.8	1538	1344.2	1372.4	631.2
AGAAGCAGAACAGGGTCTCC	Standard	YCL011C::chr3_1:uptag	144.4	144.8	181.2	322.2	270.4	234.8	277.4	272	103.4
AGAAGCCCAACACGGTCTAG	Standard	YJR004C::chr00_13:uptag	136.2	116.6	252.8	180.6	120.8	335.4	242.5	224.6	108.2
AGAAGCTCAACCCAACGTGG	Standard	YDR023W::chr4_3:uptag	64	53.8	66.4	65	58.6	90.8	88.5	68	45.4
AGAAGGCCAACCAATCTCGG	Standard	YGL121C::chr7_2:uptag	1400	1581.2	1736.2	1523.8	1341.5	2058.2	1421.2	1422	562.2
AGAAGGGTAACCAACGGCCT	Standard	YDR152W::chr4_5:dntag	635.6	677.6	1160.6	1107	1049	1351	1088.2	1114.8	451.6
AGAAGTACATAGTTGCCGC	Standard	YGR113W::chr7_4:dntag	71.2	65.6	79.2	81.8	79	80.8	90	81.25	65.4
AGAAGTCGAACAGCCTCTAC	Standard	YJR057W::chr00_13:uptag	306.6	178.75	530.4	384	259.2	616.6	465.5	493.4	170.2
AGAATAAATTACTGCCCGGC	Standard	YDR481C::chr4_8:dntag	1884.4	1859	1883.2	1949.8	1713.6	2121.2	2206.6	2287.2	2079.6
AGAATAACATGACGTGCGCG	Standard	YGR114C::chr7_4:dntag	296.2	262.4	187.8	197.75	175.8	201	192	243.8	163.4
AGAATACCAACATCCGTTCG	Standard	YJR058C::chr00_13:uptag	1376	1297.2	1538.8	1680.8	1777.2	1381.4	1522.4	1371.2	967
AGAATATAAGACCGCTGCCG	Standard	YJR059W::chr00_13:uptag	618.8	565.6	861.4	1004	738.4	1231.4	939.2	985.8	429.8
AGAATCTAACAGCGATGCCG	Standard	YJR060W::chr00_13:uptag	255	142.6	515.4	377.6	226	568.6	496.2	457.2	149.8
AGAATCTCAACCACACTTGG	Standard	YDR024W::chr4_3:uptag	299.5	242.4	599.75	414.2	214.6	604.6	474.2	546.2	136.8
AGAATGAGAACAGGTTGTCC	Standard	YCL012W::chr3_1:uptag	265.8	232	313.8	539.8	517	434	433.2	464	187.4
AGAATTGTAAATCGGACCCG	Standard	YDR025W::chr4_3:uptag	1025.6	1145.6	1592.75	1494.6	1735.2	1840.6	1670	1581.8	373.8
AGAATTTCAACAGGAGTGCC	Standard	YDR482C::chr4_8:dntag	188.2	165.2	256	373.6	283.2	373.4	276.2	338	234
AGACAAACATTCACGCCGGG	Standard	YGR115C::chr7_4:dntag	247.2	152.6	477.4	332	188.6	539.8	454.6	422.4	149.2
AGACAAAGCACCCACTTGG	Standard	YGR116W::chr00_14:dntag	85.5	81.4	178.8	135.8	87.2	239.2	200	172.8	66.8
AGACAATGAAGACGCGGTCC	Standard	YJR021C::chr00_13:dntag	1261.25	1410	1023.2	1653.2	1423.8	1231.6	1510.4	1480.2	1362
AGACACACAACGTACTCGGG	Standard	YJR022W::chr00_17b:dntag	106.75	86.8	135	101.6	104	159.6	137.4	122.2	75.2
AGACACAGAACTACCGCGTG	Standard	YJR023C::chr00_13:dntag	343.25	210.2	605.4	416.6	297.4	664.2	523.8	506	193.2
AGACACGCAAGAAGCTGGCT	Standard	YLR099C::chr12_2:uptag	422.4	461.4	876.4	828.8	670.8	970.4	690	810.8	409
AGACACTTAACGACACGCGG	Standard	YJR024C::chr00_13:dntag	219.5	181.2	281	258	254.6	279.2	212.6	278	298.4
AGACAGACAAGACGCTCCGT	Standard	YIL112W::chr9_2:uptag	1159.5	1092.2	2140.4	1485	1962.8	1726	1828.4	1607.75	683.4
AGACAGGAACCAACTTCGCT	Standard	YGR117C::chr00_14:dntag	64	59.2	69.2	71	72.2	73.8	66.8	69.4	52.8
AGACAGTCAACCAATTCGCG	Standard	YIL113W::chr9_2:uptag	1790.8	1829.6	2265	2748	2588.6	2555	2271.4	2142.4	1015.4
AGACATAACGAGACCCGCGT	Standard	YGR118W::chr7_4:dntag	55	53.2	62.2	61.8	56.4	63.6	66.8	67.25	43.8
AGACCAATAAGCACCCTGGG	Standard	YGL122C::chr7_2:uptag	79.8	64	111.4	85	71.2	145	134.8	106	54.2
AGACCAGGAACCACAGTCGT	Standard	YIL114C::chr9_2:uptag	416.8	338.2	693.4	536.8	427	813.2	639.6	604	327
AGACCCTTAACCAAGATCGG	Standard	YDR026C::chr4_3:uptag	3112.2	2808.4	1487.4	2627.6	3422.2	2894.8	2738	3296.8	1650.2
AGACCGAAATCTAATCCCGG	Standard	YDR027C::chr4_3:uptag	54.6	52	59.4	57.2	55	59.4	65.2	59.8	45.6
AGACCGTAACATAAGTCCCT	Standard	YIL115C::chr9_2:uptag	71.6	64.2	71.8	75.6	70.4	79.6	80.8	75.8	56
AGACCGTGAACCAATACTCG	Standard	YIL168W::chr9_2:uptag	3012.2	2609.75	1613.6	3464.2	3815.2	2412.6	2387.6	2804.2	1303
AGACGAGTAACCACCACGGT	Standard	YIL170W::chr9_2:uptag	659.8	662.4	666.6	941.2	905.6	840	864.4	803.2	461.4
AGACGCCGAACCAAGCGATT	Standard	YLR100W::chr12_2:uptag	249.8	133.6	440.4	311.4	198	541.4	407.4	386.8	145.2
AGACGCTCAACCACGAGAGT	Standard	YIL171W::chr9_2:uptag	85.5	83.8	110.8	91	87.6	119.2	131.2	108.2	55.6
AGACGGACAACCACTGACGT	Standard	YIL128W::chr9_2:dntag	342.25	357.6	376.4	416	213	609	305.6	521.8	170.8
AGACGGTTAAGCACAACGCC	Standard	YIL129C::chr9_2:dntag	134.6	98	205.4	151.2	110.4	317.6	212.6	228.8	87.6
AGACGTGTAAATCGTAACCC	Standard	YIL130W::chr9_2:dntag	2420.25	2155.8	3040.8	3254.4	2698.2	3489.4	3063.2	3067.4	2234.4
AGACGTTACGACCAAGCTA	Standard	YFR003C::chr6_1:uptag	105.75	97	168.2	139.4	101.4	248.6	169.5	147.4	69.4
AGACTAAGACGAGCCCTCT	Standard	YIL131C::chr9_2:dntag	381	291.4	404	386.2	263	495.2	482.5	518.8	370.4
AGACTACTAACCACTATCGG	Standard	YIR007W::chr9_2:dntag	1742	1404.4	2093.4	2015.2	1401.4	1934.6	1554.6	1714.4	1073
AGACTATAACCAGACCTCGG	Standard	YIR008C::chr9_2:dntag	138.6	102	290.6	193.6	111.8	363	265	266.4	96.2
AGACTCGAACATACACGCGG	Standard	YIR009W::chr9_2:dntag	72.2	70.4	76	68.6	66.2	81.2	85.2	74.4	52.2
AGACTCTAAATTGTCCGAC	Standard	YOR057W::chr15_1:uptag	58.75	50	56.8	56.6	55	58.6	61.2	61.6	49.8
AGACTCTGAACCACGCATAG	Standard	YIR010W::chr9_2:dntag	301.4	174.2	555.6	394.4	254.4	656.8	526.6	533	170
AGACTGAGAACCACGTCACG	Standard	YOR143C::chr15_2:uptag	191.5	120.2	281	190.2	143.2	350.6	251.8	281	116.8
AGACTGGTAACCCAACTACG	Standard	YOR144C::chr15_2:uptag	1531.4	1519	1579.4	1784.8	1550.4	2061.6	2319.8	2224	671.2
AGACTTGCACATAACAGTGG	Standard	YGR120C::chr7_4:dntag	87	81	99.6	94.6	81.6	121.8	126.8	102.8	71.4
AGAGAAAGGAATTTGCCCTC	Standard	YGR021W::chr7_3:dntag	1618.2	1487.2	2163.2	1828.8	1441.4	2166.4	2050.6	2605.8	1839
AGAGAACGAGACAGCCCTTC	Standard	YOR145C::chr15_2:uptag	306	192.75	554.6	381	254.2	643.6	527.6	498.2	174.2
AGAGAATTAACGACGCCTCC	Standard	YOR146W::chr15_2:uptag	71	69.2	83.6	84.2	70.4	84.6	99.2	88.2	61
AGAGACATAACTACCCTCGG	Standard	YOR183W::chr15_2:uptag	70.6	62.8	77.8	75	70.8	84	81.2	78.4	56.4
AGAGACCCAACCATACGGTG	Standard	YOR184W::chr15_2:uptag	539.6	799.2	821.4	834.2	992	1285.8	853	973.8	401.8
AGAGACGTAACCAGAGTTCC	Standard	YOR185C::chr15_2:uptag	345.25	280	709	540.8	438	839	485.8	661.8	249.4
AGAGAGACAACTAGCGGCCT	Standard	YOR186W::chr15_2:uptag	2262.5	1916.8	2821.8	1495.6	1849.8	3291.8	2323.4	2521.8	816.8
AGAGAGCCAAATGACTGTCC	Standard	YCL013W::chr3_1:uptag	1606.6	1453.5	2061.6	2674	2220.2	2525.6	2642.8	2658.2	1223.6
AGAGAGTAACATCACCCGCT	Standard	YEL005C::chr5_2:uptag	2354.2	2249	2781.6	2799.6	2372	2973.4	2711	3142	1376
AGAGATAACGAACGGTCCTT	Standard	YEL006W::chr5_2:uptag	1460.4	1593.8	1804.6	2047.2	1827.2	2190.8	1818.4	2170.2	948.4
AGAGATGGAAATGATGTCCC	Standard	YDR483W::chr4_8:dntag	1611.2	1400.2	2127.2	2212.6	2156.6	2340	2081.8	2285	1642.8
AGAGCAAGAACAGTTGGTCC	Standard	YCL014W::chr3_1:uptag	2079.6	2401.6	3403.25	3304.8	3377	3015.8	3874	3597.6	1705.2
AGAGCATAACATCATGGCCC	Standard	YDR484W::chr4_8:dntag	67.6	65	76.4	78.8	72.2	80	79.4	78.8	60.2
AGAGCATGAAATAGTCGTCC	Standard	YEL007W::chr5_2:uptag	70.4	69.4	91.25	130.8	108	124.4	153.75	168.2	58.6
AGAGCCCTAAATCGGAGACC	Standard	YCL016C::chr3_1:uptag	110.5	94	166.8	176	138.2	257.2	201.6	261.8	79.8
AGAGCGCAACACCACATTGT	Standard	YLR101C::chr12_2:uptag	306.4	170.8	545.5	353	236.4	651.6	505.2	503.6	155.2
AGAGCGGAACAGAGCCACTT	Standard	YLR102C::chr12_2:uptag	583.4	600.2	1208.75	1099	995.4	1393.6	859.6	939	526.2
AGAGCGGGAAATCCTAAGCC	Standard	YDR485C::chr4_8:dntag	536.6	1381.2	476	1129.4	199.6	900.8	707.8	1419.4	187.4
AGAGCTATAACTGTATCTCC	Standard	YIL029C::chr9_1:dntag	131.25	141.2	221.2	217.4	175.2	292.8	184	239.8	147
AGAGCTTTAACGAGGAAGTC	Standard	YEL043W::chr5_2:uptag	2523	2304	3192.6	2810.6	2664.2	3394.8	3255.25	3232.2	1331.8
AGAGGAGAACATCCACTCGC	Standard	YEL044W::chr5_2:uptag	84.8	72	85.4	90.8	91	121.6	105	114.8	64.6
AGAGGAGCAAATGCGACTTC	Standard	YCL017C::chr3_1:uptag	54.8	54	62.6	68.6	61.2	64	66.8	66	49.6
AGAGGCATAAATGAGTCTCC	Standard	YDR050C::chr00_11:uptag	55	46.5	59.6	63.4	56	67.4	65.6	71.8	47
AGAGGGCCAAATCATGTGAC	Standard	YDR486C::chr4_8:dntag	2331.2	2441.6	2951	2842.4	2335.4	3322.4	2551.2	2788.6	1575.4
AGAGGGTAACAGAGTATCCT	Standard	YEL045C::chr5_2:uptag	89	66	91.2	83.8	70	104.4	96.25	91.6	56.2
AGAGGTTCAAATCGGGATAC	Standard	YDL227C::ctrl_51:dntag	6740.5	5546	5771	5922.2	5526.4	6134	6029.4	6416.4	4346.6
AGAGTAACCAAGCTACCGCG	Standard	YEL046C::chr5_2:uptag	116	114	229.2	200.4	126.8	299	236.8	245.2	102.6
AGAGTACGAAATCTAGCTCC	Standard	YER003C::chr5_2:uptag	47.25	46.8	52.75	54.2	47.8	57	52.8	54.4	46.6
AGAGTATAACATCTCACCCG	Standard	YER004W::chr5_2:uptag	334	285.4	220.2	311.75	216.2	282.4	360.4	285.6	184.8
AGAGTCGAACATAGCACCCG	Standard	YER005W::chr5_2:uptag	1295.6	1099.8	1148.8	1124.6	944.6	1308	1434.4	1511.6	598.8
AGAGTCTCAAATCGTCAGAG	Standard	YER006W::chr5_2:uptag	102	78.8	166.6	141	93.8	230.6	165.6	180.2	79
AGAGTTATACAGAGACCTCG	Standard	YER053C::chr5_3:uptag	510.25	502.2	1010	918.4	939.8	946.6	1032.4	906.6	425.4
AGAGTTGAACAGCATACCCT	Standard	YLR103C::chr12_2:uptag	154.8	104.8	244.2	174.4	117.4	322.4	217	238	92.4
AGATAACGACAAGCCGCCGT	Standard	YER054C::chr5_3:uptag	422.2	292.4	809.2	737	664.8	961.6	698.6	733.2	313.4
AGATACGGAAATGGACGTTC	Standard	YER055C::chr5_3:uptag	128	135	107	232	115.4	119.6	132	136	259.2
AGATACTTAACCATAGCGCC	Standard	YER056C::chr5_3:uptag	425.75	373.2	500.8	540.4	526.2	678.8	727.8	671.4	307.4
AGATAGACAACGGGAGCTTC	Standard	YGR121C::chr7_4:dntag	1744	1450.5	2754.6	2499.4	2081.4	3065.4	2990.4	2601.8	1699.2
AGATAGTGAAATGGCGATCC	Standard	YCL022C::chr00_12:uptag	1753.2	1738	2355.4	2606.6	2220.4	2885.2	2779.4	3124	1423
AGATCAACCAACCATCGTGG	Standard	YDR028C::chr4_3:uptag	68.6	67.4	83.4	79.2	75.8	101	103.25	85.4	54.2
AGATCAAGAACGACGGCGCT	Standard	YER103W::chr00_5:uptag	77.25	74	87.8	76.4	71.4	89.6	102.4	91.4	60
AGATCCATAAATGTCTCGCC	Standard	YCL023C::chr3_1/chr00_12:uptag	1632.6	1462.2	980.2	2106	2376.6	1461.8	2836	2714	1468
AGATCCCAACATACCAGGTG	Standard	YDR029W::chr4_3:uptag	78.25	69.2	76.25	94.2	84.8	98.4	88.4	93.6	61.4
AGATCCTGAAATCGCTGACA	Standard	YNL087W::chr00_16b:uptag	1365.25	1303	1799.2	1897	1492.2	2011.2	1720.8	1821	938.4
AGATCGCTAAATGAGGACCC	Standard	YCL024W::chr3_1:uptag	1798.2	1587.6	1159.6	2737.2	2377.8	1811.4	2881.6	3222.4	1411.6
AGATGAAACGAGCATGGCCT	Standard	YDR153C::chr4_5:dntag	453.2	328.75	864	860.4	790.8	874.2	913.8	1296.8	294.6
AGATGAACCAAGGATCGGTC	Standard	YCL025C::chr3_1:uptag	160.8	170.8	207.8	249.2	209.4	244	252.8	352.4	150.2
AGATGATGAAATCGTCTCCC	Standard	YCL026C::chr3_1:uptag	72	64.6	79.2	88.4	80.2	89.4	90.4	91.2	59.2
AGATGCGAACAGCGTTACAC	Standard	YER104W::chr00_5:uptag	164.75	104.8	227.8	180.8	132.4	296.6	189.5	238.2	104.6
AGATGCGCCAAGAACATTTC	Standard	YDR487C::chr4_8:dntag	106	75.25	148	120.4	86	194.6	137.5	133.6	74.8
AGATGGGAACATACCTACCG	Standard	YER159C::chr00_5:uptag	58.4	63.2	70.2	76	64.4	78.2	64.2	78.8	58.8
AGATGTCGAAAGTGTTCACC	Standard	YER161C::chr00_5:uptag	87.8	85.8	112.2	107.6	93.4	118.8	105.8	135.8	66.8
AGATGTTTAACGTAACCCGC	Standard	YER162C::chr00_5:uptag	726.5	755.5	1466.6	924	622.2	1267.2	1084.2	1455.2	622.6
AGATTAGAACATGATCGCCG	Standard	YER163C::chr00_5:uptag	690.6	737.5	1072	1235.6	889.4	1077.6	1314.4	1302	625.2
AGATTAGTAAATGCTGCGCC	Standard	YCL027W::chr3_1:uptag	1113.2	941.25	1112.8	986.2	908	1195.2	1228.8	1250.2	750.4
AGATTGTAACAGGCAGACCG	Standard	YML108W::chr00_9:uptag	450.2	387.75	858.2	950.6	1003.8	1115.8	895.2	812.2	372.4
AGATTTGCACAGATAACGCG	Standard	YML107C::chr00_9:uptag	497	435	897.6	732.2	643.4	1033.8	719.8	829.4	421
AGCAAACCCAACATCGGTGG	Standard	YGL123W::chr7_2:uptag	101.8	95.8	135.8	119.2	88.6	146.2	171.8	117.2	135
AGCAAACTAAGAGCCGGGTC	Standard	YCL028W::chr3_1:uptag	2722.2	2973.8	3031.4	4139.6	3006.2	3378.6	3518.2	3510.6	1728.8
AGCAAAGAACCATGCCGCGT	Standard	YDR154C::chr4_5:dntag	136	99	282.8	182.4	134	383.4	293.4	270.6	98.8
AGCAAAGCAACAGTCCGTCG	Standard	YML106W::chr00_9:uptag	370.2	270.6	734.2	553.4	349.4	873.6	677.8	647.2	253.8
AGCAAATCTAAGCACCGCGT	Standard	YGR122W::chr7_4:dntag	423.2	702.6	704.2	1079.2	967.2	1259.4	851.4	1537.4	568.8
AGCAAATTAACACTTGGGCC	Standard	YGR022C::chr7_3/chr00_12:dntag	2152.2	1926.2	2293.75	2036.2	1783.2	2703.8	2249.8	2433	1909.4
AGCAACATAAGACGCGGGCT	Standard	YGR123C::chr7_5:uptag	3298.8	3591.6	4320.8	4373.4	3498.6	5009.6	5213.8	4540	2008.4
AGCAACTAAGAGACCGGCTG	Standard	YGR124W::chr7_5:uptag	867.4	782	1261	911.2	840.8	1532	1075.8	1207.6	636
AGCACAAGAACTACGCGCTG	Standard	YML105C::chr00_9:uptag	92.6	92.8	109.2	109	90.4	128.8	118.6	123.6	66.2
AGCACACCAAATTCTACGGG	Standard	YDR030C::chr4_3:uptag	156.6	139.4	171.2	148.2	148.4	195.6	168.6	170.4	105.8
AGCACCCAACATAATTTCGG	Standard	YGR125W::chr7_5:uptag	2633.25	2393.5	2803	2279.6	1668	3424.4	2929.8	3216.2	1606
AGCACGAACCAAGGCACGTT	Standard	YLR104W::chr12_2:uptag	2103.2	1678.4	1758	2189.2	2658.6	2092.2	1741	2152	1064.2
AGCACGGAACAGTAAGCCCT	Standard	YLR105C::chr12_2:uptag	214.6	120	365.2	252.6	154.6	449.6	315.4	311	125.6
AGCACGTTAAATCTCCACAG	Standard	YML048W::chr13_1b:uptag	326.4	251.6	537	446.8	314.8	669.8	526.4	527	217.4
AGCACTCAACAGGACGACGT	Standard	YML048W-A::chr13_1b:uptag	270	250.4	499.8	733.2	630.6	492.4	677.8	657	207.6
AGCACTCTAAATGACTACCG	Standard	YLR370C::chr00_11:uptag	190	172.4	472.2	768	561	759.2	411.4	647.4	156
AGCACTTGAAATTAAGCGCC	Standard	YDR488C::chr4_8:dntag	1528	1715.4	2508.6	2269.2	2279.4	2595.2	2663.8	2474	2319.8
AGCAGAAGAACGAGGCTTTC	Standard	YCL029C::chr3_1:uptag	775.2	814.75	1609.8	1448.6	1366.8	1462	1213.6	1286.4	365.2
AGCAGAGGAACCCAACTCGT	Standard	YLR106C::chr12_2:uptag	87.8	85.4	110.8	96.6	87.2	133	119.4	108	64.4
AGCAGGGTAAATCAATCTCC	Standard	YDR489W::chr4_8:dntag	68.2	69	63.5	64.4	56.8	73.2	80.5	74.6	55.6
AGCAGGTGAAATCGTACTAC	Standard	YMR009W::chr13_2:uptag	135.8	146	239.6	300	257.2	290	223.4	312.2	109
AGCAGTGCAAATCCTGATAC	Standard	YCL030C::chr3_1:uptag	84.4	70	82.6	97.2	78	95.4	79.8	98.8	58.6
AGCAGTTTAACGCGCAAGAC	Standard	YMR010W::chr13_2:uptag	2523	2750.6	3623.2	3687.8	3800.2	3334.4	3402	3391.6	1372
AGCATACAACCGACCAGGGT	Standard	YGR126W::chr7_5:uptag	179.6	148.4	378.8	278.4	174.8	452	387.6	342.6	144.6
AGCATACGAAATTCACTCCG	Standard	YMR011W::chr13_2:uptag	1067	891	1629.2	1627.2	1085.6	1662	1316.6	1666.4	927.4
AGCATATAACCACTGATCCG	Standard	YMR012W::chr13_2:uptag	1042	1150	1249.4	1566.2	1379.2	1485.2	1113.8	1359.6	592.4
AGCATCATAACCCAAGCTGG	Standard	YGL124C::chr7_2:uptag	218.4	250.6	231.8	275.8	164.8	380.4	229.2	408.6	159.6
AGCATCGGAAATGGCAAGCC	Standard	YGR023W::chr7_3:dntag	1960.8	1651.6	2442.4	2072.2	1671.2	2670	1864.2	2720.2	2157.6
AGCATGAACCAGACTACCTG	Standard	YER119C-A::chr00_5:dntag	637	822	662.6	1869.4	794.4	1301.4	995.2	1473.2	585.4
AGCATTACAACCATACTGCG	Standard	YER120W::chr00_5:dntag	1676.8	2123.2	2416	2733.2	2305.6	3124.4	2749.8	2927.2	1703.2
AGCCAAATCTACTACACGGT	Standard	YGR127W::chr7_5:uptag	254	318.4	521.6	440.8	433.6	495.8	311	419.6	186.8
AGCCAACCATCAATACGGGT	Standard	YGR128C::chr7_5:uptag	88.8	90.6	111	103.8	97	121.8	120.25	107.6	66.4
AGCCAACGAACCTACATGGG	Standard	YDR031W::chr4_3:uptag	304.75	288	272.4	475.6	392.6	469	440.8	531.2	275.4
AGCCAAGAACGAGAGCGTCT	Standard	YER121W::chr00_5:dntag	201.75	162	311.6	243.2	216.2	397.4	294.2	316.4	170.8
AGCCAATCAACCACTGTAGG	Standard	YDR032C::chr4_3:uptag	229.6	155.2	451	298	202.4	552.25	435.4	404.2	131.2
AGCCACGTAAATCGTTAGAC	Standard	YER122C::chr00_5:dntag	122.2	85.2	161.4	128	100.6	209.8	141.25	122.8	88.8
AGCCACTGAAATGATACTCC	Standard	YCL031C::chr3_1:uptag	156.8	108	240	164.2	128	296.2	187.8	187	104.6
AGCCAGACAAGAGACCTGCT	Standard	YLR107W::chr12_2:uptag	366.2	396.8	736.5	794.2	675.8	918.4	631.8	648.6	396.6
AGCCATAGAACCTAAGGCCG	Standard	YDR033W::chr4_3:uptag	355	320.8	570.8	470.6	382.4	699.8	568.2	656.6	326.4
AGCCATTCAAATTACACGCG	Standard	YDR034C::chr4_3:uptag	110.8	100.25	97	83	70.4	102.6	97.5	89.6	63
AGCCCGAGAAATCTAGTACC	Standard	YMR129W::chr00_9:uptag	2643	2514	3019.5	3429.4	3031.6	3501.2	3831	3353	1671.4
AGCCCGGTAAATCGTGCAGA	Standard	YDL227C::ctrl_53:uptag	4258.2	3676.8	3520	3836.8	3519.6	4003.8	3877.6	4038.6	2214.4
AGCCCTATACAACCATGAGG	Standard	YDR035W::chr4_3:uptag	1818	1914.8	1388.5	1762.2	1878.6	1696	2049.4	2028.2	1144.2
AGCCCTCAACAGGCAGGAAT	Standard	YGL150C::chr7_2:dntag	152.8	94.8	289	182.2	138.6	302.5	272.8	252.8	89.8
AGCCCTCGAAAGTTATTCAC	Standard	YCL032W::chr3_1:uptag	300.6	240.6	534	342	343	478.4	451.4	498	246.8
AGCCCTTAACACTTCGTAGA	Standard	YMR130W::chr00_9:uptag	2748.2	2732.4	3050.2	3385.6	3579	3272.6	2882	3219.4	1500.4
AGCCCTTAACCGGGTAGGA	Standard	YNL061W::chr00_16b:uptag	64	63	94.4	75.2	76.4	108.8	99.6	84.6	51.2
AGCCCTTCAAATCTCGATAG	Standard	YDR036C::chr4_3:uptag	3613.4	3093.6	2696.75	2858	2653.2	2531.2	3601.8	3190.2	1971.6
AGCCGAAGAACCATAGCTCG	Standard	YMR131C::chr00_9:uptag	268	152.2	458.4	346.6	202.4	580.4	411.6	425.8	157.4
AGCCGACAACAGGCACAGTT	Standard	YLR108C::chr12_2:uptag	314.2	210.6	613.2	426.8	305.6	659.8	600.2	508.6	192.6
AGCCGCACAAATTCGATACG	Standard	YMR132C::chr00_9:uptag	2330.6	2081.4	3115.2	2479.6	2182.2	2992	3133.2	3055.6	1248
AGCCGGAACCAGAGAGACTT	Standard	YLR109W::chr12_2:uptag	334	265.4	556	596.4	432	800	526.8	582	340.8
AGCCGGGAACACTTTCGACT	Standard	YLR110C::chr00_15:uptag	580.8	630	904.8	1534	1242.6	1436.4	1281.6	1661	368.4
AGCCGGGCAAATGCTACACA	Standard	YLR178C::chr12_3:uptag	2089.4	1809.2	2436	1703.4	2181	2397	2290.8	2255.2	1353.8
AGCCGGTCAAACCAACATTG	Standard	YGL125W::chr7_2:uptag	72.2	74.6	95.8	84.2	64.4	117.4	105.8	97.8	54
AGCCGTAGACAAGACTAGCG	Standard	YMR187C::chr13_4:uptag	2018.8	2287.2	2397	3045.6	3202.4	3033.6	2518	2833.8	1365.8
AGCCGTATAAATCACAGTCC	Standard	YMR188C::chr13_4:uptag	281.25	169	524.4	388.6	229.6	635.4	485.2	489.8	165.6
AGCCGTCGAAATCCTGTACG	Standard	YMR189W::chr13_4:uptag	2510.8	2836.8	2448	3812.2	3723	3125	3238.8	3525.6	1899
AGCCTAAATGGGTACAACCG	Standard	YGR129W::chr7_5:uptag	2957.5	2716.8	2951.4	2738.2	2388	3162.2	2923.4	3264.6	1779
AGCCTAGCAAATGTAGTACC	Standard	YMR190C::chr13_4:uptag	118.6	112.2	132.5	190.8	113	186	134.25	152.6	90.8
AGCCTAGTACAAATTCTGCC	Standard	YCL033C::chr3_1:uptag	66.8	62.6	69	81.6	70.8	77.6	80.4	77.6	56.4
AGCCTATCACAACCGAGAGG	Standard	YGR130C::chr7_5:uptag	380.2	334.6	745.4	590	457	958	586.4	686.4	369.4
AGCCTCACAAATCTTTACGG	Standard	YDR037W::chr4_3:uptag	77.2	70.6	77.6	75.2	86.6	84.6	86.6	84.6	60.8
AGCCTCGTAAATCTCTCAGA	Standard	YMR158W::chr00_8:dntag	91.5	82	91.2	103	79.4	103.8	105	107	72.6
AGCCTGCGAAATCTACTGAA	Standard	YNL085W::chr00_16b:uptag	1152	767.8	764.2	1593.8	1202.6	1498.2	979.2	1284.6	754.8
AGCCTGGAACAGCTATACAC	Standard	YMR158W-A::chr13_4:dntag	1350.4	1399.2	2333.2	1982	2133.2	2680.2	2204.8	2285.4	1534
AGCCTTATAGAACCAGCTAC	Standard	YMR159C::chr13_4:dntag	515.25	577.25	855.2	903	813.8	1058	691.8	848.2	602
AGCCTTTCAACCCAGGGAGA	Standard	YGL253W::chr7_3:uptag	1111.2	1010.4	1075.4	1166	898.6	1419.75	809.8	1137	598
AGCGAAGCAACCAGCATTCT	Standard	YDR155C::chr4_5:dntag	423.25	337	755.6	574.4	415.8	869.4	636	698	314.4
AGCGACATAACGCAACCTGG	Standard	YMR160W::chr13_4:dntag	62.6	56.4	68.8	67.6	56.8	90.8	79.8	75.4	51.6
AGCGACGTAAATGACCTACC	Standard	YMR218C::chr13_4:dntag	58.6	58.6	60.6	70.6	66.6	77.6	68.2	68.4	52.8
AGCGAGCTAAATGCTGGACA	Standard	YNL084C::chr14_3:uptag	394.6	342.6	286.6	406.4	345.2	369.6	414.2	433.2	458.6
AGCGAGTCAAATGTATCGAC	Standard	YMR219W::chr13_4:dntag	1419.4	1116.2	1086.6	1612.6	1504.6	1918	1380.4	1991.8	1824.6
AGCGATAGAACCGGACACCT	Standard	YMR220W::chr13_4:dntag	60.4	63.6	71	68.4	65.2	74.8	71.4	73.6	50.6
AGCGATTCAACCCACAATGG	Standard	YGL126W::chr7_2:uptag	1112.6	970	1130	1201.4	1044.4	1506.2	1027.6	1194.8	717.4
AGCGCACGAAATTGCACTAC	Standard	YMR221C::chr13_4:dntag	2295.4	2807.6	3908.2	4515.6	4146	4515.8	4785	4024.4	3195.6
AGCGCAGTAAATAGCTTAGC	Standard	YAL020C::chr1_1:uptag	2841	2644	3644.8	3492.6	3519.2	4038.2	4103.75	4576	2031.4
AGCGCATAAAGCGACACGT	Standard	YAL019W::chr1_1:uptag	153.4	195	590.2	616.8	464.2	749.4	684	566.8	227
AGCGCATTAACCCAGCAGAG	Standard	YDR041W::chr00_16b:uptag	319.2	196.4	585.8	429.4	276.4	672.4	573	524.6	182.4
AGCGCCCAACATCTGAGAAG	Standard	YDR042C::chr4_3:uptag	111.4	85.8	216.75	139	104.4	309	174.4	213.2	80.2
AGCGCCCTAAATGGTAAGAC	Standard	YCL034W::chr3_1:uptag	106	87.2	161	186.6	153.8	218.8	198.2	244.2	85.6
AGCGCGAACCACGTTTAAGA	Standard	YGR131W::chr7_5:uptag	2415	2371.8	2760.6	2990.8	2581.8	3417.6	3298.6	3635.6	1659.8
AGCGCGTGAAATGCACATAC	Standard	YAL018C::chr1_1:uptag	1817.2	1943	3324.6	3230.6	3251.6	3189.4	3088.5	3402	1749.8
AGCGGACAACAGTCTACACG	Standard	YAL017W::chr1_1:uptag	436	446	1024	1105.4	1182.8	1193	1093.6	1017.6	386
AGCGGACTAAATATAGGTCG	Standard	YER030W::chr5_3:dntag	1275.4	1065.8	1793.6	1862.8	1462.6	1544.2	1812.6	1425.8	1756.8
AGCGGAGGAACCAGTAATCC	Standard	YDR071C::chr00_11:uptag	1172	1372	950.4	2395.8	2189.2	1892.8	2246	2606.4	878.2
AGCGGATCACAACGAAGCTC	Standard	YGR132C::chr7_5:uptag	93	85.2	139.8	111.2	101	169.2	141.5	151	78
AGCGGCATACAACGGAAGCT	Standard	YLR111W::chr12_2:uptag	427.8	423.8	671	773.8	757.2	917.2	895	850	396.2
AGCGGCGAACAGCTCGATAA	Standard	YER032W::chr5_3:dntag	660	620.4	1260.6	1139.6	962.6	1179.8	1368	1493.4	737.6
AGCGGGACACAACCGATACT	Standard	YER033C::chr5_3:dntag	2043.6	1916.25	2357.2	1842	1936.6	2719.8	2129.5	2484.8	2064.8
AGCGGGTGAAATGACTATAC	Standard	YER085C::chr5_3:dntag	1760.8	1363.75	2147	1954.4	1756.2	2086.2	2138.2	2593	1656
AGCGGTCAACACCACTAGAG	Standard	YER086W::chr5_3:dntag	218.8	133.8	425.6	301.2	167.8	534.4	396.8	390.6	125.4
AGCGGTCCAAATGACAGACG	Standard	YER087W::chr5_3:dntag	143.5	89.75	200.6	149.2	102.4	259.8	206.2	203.8	78
AGCGGTGGAAATGCTTACAA	Standard	YLR179C::chr12_3:uptag	252	185.4	262.75	218	231.2	243.8	308.4	225.8	164.4
AGCGGTTTAACGTCAACGCA	Standard	YER087C-A::chr5_3:dntag	2069.4	1895.6	2637.6	2812.6	2729.4	2219.8	2512.4	2433	1635.2
AGCGTAGAACAGTATATCCG	Standard	YHL003C::chr8_1:uptag	2451	2105.4	3535.4	3068.4	3010.2	3333.4	2888.2	3065.6	1247.8
AGCGTATAAGAAGAGGTCCT	Standard	YHL002W::chr00_10:uptag	1455.5	1916.4	2643.8	2876.4	2234.2	2990.2	2404.6	2883.4	1041
AGCGTATGACAACGAACTGG	Standard	YGR133W::chr7_5:uptag	1583.6	1391.75	1546	2451.2	909.6	1959	1294.4	2470.8	623
AGCGTCACACACAAGACTGG	Standard	YGR134W::chr00_8:uptag	774.8	830.5	1069.4	1202.6	961.2	1466.2	1146.2	1179	712
AGCGTCTGAAATGCTATCAC	Standard	YHL035C::chr8_1:dntag	1791.4	1653	2490.4	2650.4	2304.2	3181.8	2361.4	2624.2	1784.8
AGCGTGATACAACCTGATAC	Standard	YHL034C::chr8_1:dntag	1568.8	1531.2	1813	1895.6	1394.2	2235.8	2194.25	2319.4	1223.8
AGCGTGGCAAATGGTCACAA	Standard	YLR180W::chr12_3:uptag	2988.8	3533.4	3476.25	4543	3785.6	4359.6	3704.6	4545	1714.6
AGCGTTACAACAAGTGGACC	Standard	YHL033C::chr8_1:dntag	681.4	699.8	684.6	1333.6	878.8	1447.6	637.4	1099.2	456.4
AGCGTTCTAAATGCGTCACA	Standard	YHL032C::chr8_1:dntag	2722.8	2579.2	3041	3669.2	3375.4	2957.2	3041.6	2908.2	2748.2
AGCGTTGCACATACAAGACC	Standard	YER063W::chr00_10:dntag	103.25	89	146.8	131.4	110.6	154.2	142.4	146.2	99.4
AGCGTTTGAACAGGACCACA	Standard	YNL083W::chr00_16b:uptag	99	82.4	180.5	127.8	86	231.2	171.25	183	71.2
AGCTAACCAGAATACGCGCT	Standard	YHR028C::chr8_1:dntag	916.2	1055	1512.6	1617.5	1639.4	1462	1079	1679.4	815.8
AGCTAACTAACCCAGAGCGG	Standard	YHR029C::chr8_1:dntag	392	354.4	661.2	563.2	481.4	776.8	578.25	622.2	356.2
AGCTACAACCAACTCAGGGT	Standard	YLR112W::chr12_2:uptag	230.6	235.2	408.6	439.4	364.4	420.6	277	344.8	159.6
AGCTACAGAACGCTACACGG	Standard	YPL244C::chr16_1:uptag	82.5	81.6	111.8	87.8	76.4	143.2	121.6	120	66
AGCTACCAACAGTCCTAGAG	Standard	YPL243W::chr16_1:uptag	334.6	227.4	653.8	499.2	328.2	751.4	622.6	563.4	207.2
AGCTACTAACAGGTATAGGC	Standard	YGR135W::chr7_5:uptag	79.8	83.5	87.8	93	88.4	99	104.6	102.4	61.8
AGCTAGGCAAAGTTTACCAC	Standard	YCL036W::chr3_1:uptag	225.6	143.2	526.667	351.4	424.4	472.6	510	664.6	181.4
AGCTAGGTAAATTCAGAGCC	Standard	YCL037C::chr3_1:uptag	171.5	178	254.6	122.6	116.6	310.8	190.2	250.6	99
AGCTATATCAAGCGAGCGTC	Standard	YPL242C::chr16_1:uptag	73.6	63.6	86.6	97.6	76.6	106	103.75	90.8	60.2
AGCTATGCAAATTAGAGGCC	Standard	YDR490C::chr4_8:dntag	1619.2	1354	1881.75	1802	1522.4	2454.6	1741.8	2372.2	2108.2
AGCTATTAACAGTAGACGCG	Standard	YPL241C::chr16_1:uptag	62.6	59	67.8	77.4	65	79.4	77.4	76	53.6
AGCTCAGGAAATTCTAGCGA	Standard	YNL082W::chr00_16b:uptag	839.5	860.4	1315	1014.6	877.4	1389	991.4	1139	295.8
AGCTCCAAATCTTAGACACG	Standard	YGR136W::chr7_5:uptag	2931	2885	3255.2	3286.2	2822.2	3608.2	3788.4	3407	1645.4
AGCTCCCGAAATGCAAGACG	Standard	YDR043C::chr4_3:uptag	354.2	286.2	334.5	311.2	265.8	416	393	480.6	167.2
AGCTCCGCAAATGGGCTACA	Standard	YLR181C::chr12_3:uptag	1962.4	2459.8	2034.6	2936	2813.6	2818.4	2739.6	2826.6	1407.2
AGCTCGTAACATGCGATAC	Standard	YOR055W::chr15_1:uptag	1245.2	1136.6	1854	1612.2	1972.6	1860.2	1832.6	1618.6	853.2
AGCTCTGAACAGTAATACCC	Standard	YPL222W::chr16_1:dntag	1172	862.4	1459.2	1524	1306	1579.8	1736	1723.6	1381
AGCTGAACAATAAGCGGCC	Standard	YDR491C::chr4_8:dntag	65	55.5	85	63.6	66.8	85.8	78	75.2	54
AGCTGACGAAATCTTCACAC	Standard	YPL221W::chr16_1:dntag	2792.2	2264.4	3241	2736.2	2267.2	3021.4	3453.2	3738	3067.2
AGCTGAGAACAGTGTAGACT	Standard	YPL220W::chr16_1:dntag	1315	1328.4	1963	2022	1386.6	2419.8	2009.75	2282.8	1827.2
AGCTGATCCAAGCAACGTAC	Standard	YPL219W::chr16_1:dntag	1452.6	1437.6	2148.6	1128.8	947.4	2307	1333.6	2033.2	1502.6
AGCTGATTAACCCGTAAGAC	Standard	YDL227C::ctrl_33:dntag	4880.6	4265.4	4876.6	5077.2	4425.6	5307.2	5212.6	5477.6	4159
AGCTGCAAATGCCATGAACC	Standard	YGR024C::chr00_14:dntag	196.2	112.6	285.6	213	150.8	427	263.4	301.2	125.4
AGCTGGAAATGGTGCATAAC	Standard	YGR137W::chr7_5:uptag	227.8	214.2	425	388.2	275.8	482.6	355.6	378.6	247.6
AGCTGGCTAAATGGAATACC	Standard	YDR492W::chr4_8:dntag	1836	1224.2	1975.6	1881.8	1781.4	2295.8	2045.6	2420	1985
AGCTGGGCAAATTAAGTACC	Standard	YDR493W::chr00_17a:dntag	1064.8	1070	770.75	1413.8	980.6	1377.6	1230	1663.8	1318.2
AGCTGGGTGCAAATAGCGAT	Standard	YLR114C::chr12_2:uptag	173	167.6	260.75	265.8	161	293.2	346.4	356.2	159.4
AGCTGTAAATGTATGACCCG	Standard	YNL314W::chr14_1:uptag	1372.4	1039.6	1093.2	1193.8	1021.2	1318	1278	1321.8	579.2
AGCTGTAGACAACTATACCG	Standard	YNL313C::chr14_1:uptag	69.6	72.8	78.4	81.8	77.4	91.4	89	84.4	53.2
AGCTGTGGAAATGTCCGACC	Standard	YDR074W::chr00_11:uptag	81	112	87.25	93	66	162.4	113.8	108.6	69.2
AGCTGTTCACAAATTGGACC	Standard	YGR138C::chr7_5:uptag	62.4	61	67	65.2	64.6	77.2	72	76.8	55
AGCTTAACATACAATCGGCG	Standard	YGR139W::chr7_5:uptag	1416.4	1225	1168.2	1293	886	1532	1109.2	1306.2	671.8
AGCTTACGAACCAGTAGACC	Standard	YNL312W::chr14_1:uptag	166	111.2	250.6	176.6	126.2	324.8	217	237	115
AGCTTAGTAAATCTGTGCCC	Standard	YCL039W::chr3_1:uptag	616	551.4	622	803.8	666	645.2	771.6	825.6	322.2
AGCTTCAACAGTAATCACCG	Standard	YGR140W::chr7_5:uptag	76	70.75	108.6	94.8	73.6	133	125.8	96.6	63.2
AGCTTCGCAAATCTGGTACA	Standard	YNL081C::chr14_3:uptag	1856.4	1922.8	2619.8	3354.4	2511.6	3274	3026.4	3342.8	1247.8
AGCTTCTTAACCCACGTAGA	Standard	YNL255C::chr14_1:uptag	135.75	124	147.4	140.2	136.6	158.4	184.6	149.4	84.4
AGCTTGAAATAGCCATACCT	Standard	YLR113W::chr12_2:uptag	872.5	801.2	761	774	493.8	885.2	825.8	965	424.8
AGCTTGCACAGTAACCATGA	Standard	YNL080C::chr00_16b:uptag	293.8	180.8	532.6	382.4	268.8	648.2	494.4	484.6	172.2
AGCTTTGTAACCCAATACCG	Standard	YDR044W::chr4_3:uptag	60.3333	52.4	52	64.6	53.4	66.4	65.6	68.2	48.6
AGGAAAGAACCCGAGCGTCT	Standard	YLR115W::chr12_2:uptag	70.6	64.6	77	83.2	72.8	91.2	87	81.2	52.2
AGGAAATCAGTGGAACCCGC	Standard	YGR141W::chr7_5:uptag	3049.4	3072.6	3493	3776.8	2625.2	4039.4	3564.4	3969.4	2224
AGGAAATTGCAGGAACCCTT	Standard	YGR142W::chr7_5:uptag	2092.6	1979.6	2746.4	2742.2	2541.6	2667.4	2841	2732	1429
AGGAACAGGGCGACAACCTT	Standard	YDR156W::chr4_5:dntag	588.25	767.2	1002	1157.8	711	1372.4	963.2	1430.8	432.8
AGGAACGTAACCATCAGTCC	Standard	YNL254C::chr14_1:uptag	1850.2	1915	2274.2	1517.6	1272.8	2622.4	2331.8	2806.4	1093.8
AGGAACTCAACCAGGGTACG	Standard	YNL253W::chr14_1:uptag	886.2	948.8	1355.2	568.2	615.6	1382.4	1239.2	1219.2	473.8
AGGAAGATAACGATGTCTCC	Standard	YNL252C::chr00_8:uptag	59.6	52.4	60	66	59.2	61	64.2	65.8	49.8
AGGAAGCTAACCATCTACCG	Standard	YNL299W::chr14_1:dntag	2377.8	2170.6	3702	3435.6	3389.8	3585.6	3385.4	3145.8	2325
AGGAAGTTAAGCGAACCGCC	Standard	YCL040W::chr3_1:uptag	57	54.6	61	63.8	54.6	72.6	64.2	62.2	50
AGGAATACAACTACCTCTCG	Standard	YNL298W::chr14_1:dntag	384.8	396	599.2	517	527.6	496.4	297	451.4	305.6
AGGAATAGAACATTGGCGCT	Standard	YDR157W::chr4_5:dntag	51.6	46.6	56.8	51.8	48.2	61.2	59.2	56.4	44.8
AGGAATCGAACCAGCGCGTA	Standard	YNL296W::chr14_1:dntag	123.4	99.4	177.5	135.4	100.8	241.8	177	150.2	75
AGGAATCTAACCACGCGCAG	Standard	YGR143W::chr7_5:uptag	352.2	320.6	734.8	595	453.2	884.2	739.6	676.2	257.4
AGGACAACCGAGCACACGTT	Standard	YGR144W::chr7_5:uptag	922	1088.4	1648.4	1668	1757.6	1865.8	1631.8	1567.2	699
AGGACAAGAACCGTACCCGT	Standard	YGR145W::chr00_15:uptag	56	55.75	72.2	65.4	57.2	73	77	71.4	50.8
AGGACAGAACCATCTAGCCT	Standard	YGR146C::chr7_5:uptag	1234.4	1150.2	1441	1536	1082.2	1848	1506	1477.8	786
AGGACATCAACGAAGGCTCC	Standard	YCL041C::chr3_1:uptag	63.5	51.5	69.4	67	64.6	76	73.8	72	49.8
AGGACCCGAAATTAGAGTCG	Standard	YNL297C::chr14_1:dntag	700.4	1187	1217.6	1016	975.4	1534.2	953.8	1334.4	859.2
AGGACCGTAAATTCAAGTCG	Standard	YNL251C::chr14_1:dntag	56.75	50.4	64.4	59.2	52.4	68.8	64.8	64.8	46.4
AGGACGATAACCAGTCACCG	Standard	YNL250W::chr00_8:dntag	129.2	98.4	222.6	178.6	106.4	325.2	203.4	205	92.8
AGGACTACAACCAGCCTGAG	Standard	YGR147C::chr7_5:uptag	333	304.6	613.4	413.6	300.8	704	559.2	536.4	184.8
AGGACTAGAACCATGAGTGC	Standard	YNL249C::chr14_1:dntag	1238.2	870.8	990	998.2	1066.6	1352.4	1351.67	1233	834.8
AGGACTCAACAGTATCACCG	Standard	YNL248C::chr14_1:dntag	92.4	68.2	136.4	96	89	152.4	146.8	121	70.6
AGGACTGGAAATTACTTGCC	Standard	YDR494W::chr4_8:dntag	2012.6	2118	2983.4	2693.8	2247.2	2971.8	3176	3047.4	2148
AGGAGAAACCACCCACTTGG	Standard	YGL127C::chr7_2:uptag	139.2	90.6	261.6	179.4	100.4	370	250.8	266.8	94.2
AGGAGACGAACGAAGTTTCC	Standard	YMR271C::chr00_8:uptag	3118.6	2744.6	3523.8	3929.8	3953.2	3759.2	3967.5	3598.2	1285.4
AGGAGAGCAACCTACACTCG	Standard	YMR272C::chr13_5:uptag	841.6	1005.2	1367.8	1381	1142.8	1300.2	1458.4	1132.8	746.4
AGGAGCAACCATCATGCACG	Standard	YGR148C::chr7_5:uptag	184.2	213.8	328.4	285	232.8	399	288.6	319.4	189.2
AGGAGCGTAAATTATCAGCC	Standard	YCL042W::chr3_1:uptag	128	78	193.6	145.2	97.8	267.4	187.8	229	86.8
AGGAGTCTAAATGGGCTTAC	Standard	YCL043C::chr3_1:uptag	60.6	53.2	62.6	71	62	71.8	66.8	69.8	51.4
AGGAGTTCAAATGCTTGCAC	Standard	YDR495C::chr4_8:dntag	65.2	61.8	62.25	75.6	67.4	79.6	71.6	79.8	58
AGGATACCAACGACGACTCG	Standard	YMR273C::chr13_5:uptag	1202	905.4	1098.2	1122.6	995.8	1121.2	904	832	627.6
AGGATAGTAACCACTCCACG	Standard	YMR313C::chr00_8:uptag	701.2	932.8	1050.8	1084	829.8	878	632	805.8	370.8
AGGATATCCAACCATCCGT	Standard	YGR165W::chr7_5:uptag	68.4	63.2	75.8	84	63	84.8	100.6	77.4	58
AGGATCTAACACTTGCTACC	Standard	YMR314W::chr00_8:uptag	65.8	67.6	74	82	70.2	88.2	80.6	82.4	60
AGGATCTCAAAGTTGTCGAG	Standard	YMR315W::chr00_8:uptag	3190.6	3393.2	3308	4111.4	3470.8	3861.6	3420.8	4156.4	2528.6
AGGATGGCAAATGTGATACC	Standard	YDR496C::chr4_8:dntag	786	658.5	1155.5	1326.8	629	1520	909.5	1438.4	831.6
AGGATTAGAACCTACGCACC	Standard	YMR316W::chr00_8:uptag	2139.6	1931.6	1926.4	1961.8	1735	2430.2	2271	2105.4	1301.8
AGGATTGAACATATCGACCG	Standard	YMR268C::chr13_5:dntag	71	64.6	73.4	76.4	67	80.6	78.2	78	56
AGGATTGCACAGGGAACTAC	Standard	YCL044C::chr3_1:uptag	93.6	80.25	170	135.2	96.8	196.6	148	137.2	69.4
AGGATTTCAACCCGACGAC	Standard	YCL045C::chr3_1:uptag	636	548.25	442.4	557	478.6	582.6	470.75	546.6	371.4
AGGCAAACACAGATGCGGCT	Standard	YDR158W::chr4_5:dntag	610.2	785.8	888.5	952.6	673	1250.8	910	974.8	381.2
AGGCAAATCTTCAGAACCCG	Standard	YGR149W::chr7_5:uptag	2897.8	2506.6	3191.25	3279.6	2914.6	3766.8	3918.6	3511.8	1720.2
AGGCAACATCAATACCTCGT	Standard	YGR150C::chr7_5:uptag	64	64.2	76.6	79.8	67.2	91	88.4	80	58.6
AGGCAACCATACAGACCTGG	Standard	YGR151C::chr7_5:uptag	1044.5	1165.2	1629.6	1669.8	1476.2	1856	1598.6	1552.8	977.6
AGGCAACTAACTACACGTCG	Standard	YMR269W::chr13_5:dntag	166.25	193.2	314.2	416.6	219.4	402.8	200.6	271.2	197.6
AGGCAAGTAACCGTACACCG	Standard	YMR270C::chr13_5:dntag	65.8	71.2	72.6	73	66.8	82.8	84.6	77.8	56.2
AGGCAATGAACCGTAAGTCC	Standard	YCL046W::chr3_1:uptag	769	677.4	837.4	746.4	716.6	882.2	764.4	870.4	552
AGGCACAACCGGGAATACCT	Standard	YGR152C::chr7_5:uptag	3081.75	2955.6	3880.2	3572.4	3233	4126.2	3673.8	3738.2	1983.6
AGGCACAGAACCGATCACGT	Standard	YMR271C::chr00_8:dntag	685.4	608	1073.8	1312.8	1168	1329.2	870.4	949	681.8
AGGCACCTAACCCAATGAGG	Standard	YGL128C::chr7_2:uptag	51.2	56.6	63	70.8	49.4	98.6	79.8	64.4	46.8
AGGCACTCAAATTGCGACAC	Standard	YCL047C::chr3_1:uptag	150.4	143.6	214.4	258	159.4	288.8	249.2	317.8	142
AGGCAGACAACTCAATCCGG	Standard	YDR045C::chr4_3:uptag	68	66.6	77.2	74.6	64.6	89.8	89.4	86.8	54.8
AGGCATCTAAATGTATGGCA	Standard	YGL254W::chr7_3:uptag	2589.4	2056.6	2447.6	2551.6	1921.6	2875.2	2345.4	2766.6	1715.4
AGGCCAAATTATATCCACGC	Standard	YDR497C::chr4_8:dntag	1120	891.4	1240	1274.8	1203.6	1326.4	1485.2	1660.4	1070.8
AGGCCAGTAAATTCCTATCC	Standard	YDR498C::chr00_17a:dntag	62	58.6	67.25	66	60	77.2	82.8	74.4	55
AGGCCGAACCAGCACAGATT	Standard	YDR159W::chr4_5:dntag	335.4	219	636.6	463.6	320.8	711.2	627.6	529.2	189
AGGCCGTAAATGTCGGACT	Standard	YLR116W::chr12_2:uptag	91.25	87.8	117.8	111.5	88	132	144	111.6	109
AGGCCGTAACAGGCGTTCAA	Standard	YNL079C::chr00_16b:uptag	247.6	404	426.4	621.2	382.6	695.8	416.4	458.6	129
AGGCGAAATTATTGACACCG	Standard	YDR046C::chr4_3:uptag	2234.5	2004.4	2295.4	2151.2	2264.8	2543.8	2397.8	2713.6	1510.8
AGGCGCTAACAGTCCAGAAC	Standard	YMR311C::chr00_8:dntag	302.25	178.2	534	394.6	266.2	654	495.6	494.6	167
AGGCGCTTAAATGTGGATAC	Standard	YCL048W::chr3_1:uptag	2437.25	2186.6	2541	3311.2	2899.8	3191.6	3293.4	3540.8	1787.4
AGGCGGATAAATGTTACGAC	Standard	YMR312W::chr00_8:dntag	519.8	662.6	560.25	475.4	483.6	918.6	428	513.8	513.2
AGGCGGCAACAGTATGTAAC	Standard	YMR313C::chr00_8:dntag	813.6	984.8	1943	2116.2	1544	2008.6	1105	1679.8	1027
AGGCGGCGAAATGTCATCAA	Standard	YLR182W::chr12_3:uptag	49.4	49.2	59.4	367.8	252.6	249.2	70.8	73	49.8
AGGCGGTCAAATCTTCTCAA	Standard	YLR183C::chr12_3:uptag	73.8	74.6	101.8	97.4	88.4	131.6	136.6	111.6	67.2
AGGCGTACACAACGGTATAG	Standard	YMR314W::chr00_8:dntag	112.5	91.8	127.6	130.8	98.8	136.4	131.4	121	72.8
AGGCGTATAGAACTAACTGG	Standard	YJL188C::chr10_1:uptag	57	56.5	61.6	65.4	58.4	71.6	68	69	47
AGGCGTCAACACAGCCAGAT	Standard	YGR153W::chr7_5:uptag	270.2	164.4	508.2	331.8	246.4	534.6	465.8	423.4	142
AGGCGTGTAAATTATTCGCG	Standard	YJL187C::chr10_1:uptag	3725.2	3444	3585.6	4217.4	3996.8	4165.2	4176.8	4281.8	2063
AGGCTAACATATTATCCCGC	Standard	YGR154C::chr7_5:uptag	380.6	361	453.6	652.4	553.4	562	586.6	698.8	321
AGGCTAAGAACGCACACTCG	Standard	YJL186W::chr10_1:uptag	1785.4	2077.8	2139.4	2158.4	2110.4	2679.6	2565.6	1831.2	1253.4
AGGCTACCAACCCTTAATAG	Standard	YDR047W::chr4_3:uptag	65.6	66	71.2	83	67.8	75.4	74	79	57.8
AGGCTATAAGAAGCGACCCT	Standard	YLR117C::chr12_2:uptag	65.6	67.2	75.8	76	85.4	83	87.6	89	57.2
AGGCTATTACAACCTACTGC	Standard	YGR155W::chr7_5:uptag	61.4	60.6	73.4	71	66.4	81.4	73.8	76.8	53.6
AGGCTCACAGAACCTACTAG	Standard	YGR156W::chr7_5:uptag	319.6	197.4	591.2	423.6	306.8	682.6	533.4	509.8	189.6
AGGCTCAGAAATGTGTCACC	Standard	YCL049C::chr3_1:uptag	2773.4	2873	3281	3345.6	3283.8	3682.8	3413.8	4063.8	1606
AGGCTCCTAAATTGCGTACA	Standard	YNL078W::chr00_16b:uptag	4006	3443.2	3408	3717.6	4132.6	3680	4134.4	3873.8	2116.4
AGGCTTGAACATCACATACC	Standard	YCL050C::chr3_1:uptag	2958.5	2369.6	3091	3174	2861.8	3326.8	3430	3483	1462.8
AGGCTTGGAAATTCGTGACA	Standard	YLR184W::chr12_3:uptag	655.2	612	527.25	768.6	492.8	1054.2	1102.5	1373.2	448
AGGGAAACACATGGACCGCT	Standard	YDR160W::chr4_5:dntag	71.4	62.8	81	77.6	60.2	91.8	95.8	88.4	56.4
AGGGAACGAACGACACTTCT	Standard	YJL185C::chr10_1:uptag	2502.2	2069.2	2464	2365.8	2135.6	2843.4	2145.8	2510.8	1228.6
AGGGAATTAAATCTCGTCCG	Standard	YDR048C::chr00_16b:uptag	1347.4	1635	1468.25	1943.8	1487.6	2242	1873.2	2623.6	848.4
AGGGACATAACGGGAATTTC	Standard	YDR499W::chr4_8:dntag	58.2	54	59.5	66	61	71	61.6	69.2	47.4
AGGGACCAACAGTTACGACG	Standard	YJL136C::chr00_14:uptag	383	265	536.8	658.8	447.2	701.2	638.2	542	294.6
AGGGAGCAACATACGATCCT	Standard	YGR157W::chr7_5:uptag	496.4	547.6	198.75	582.6	375.8	630.4	258.2	701.4	160.6
AGGGAGTCAAATTGGTACAC	Standard	YCL051W::chr3_1:uptag	1098.2	927.8	1221.2	1255.6	1113.8	1346.2	1633.2	1496	566
AGGGATAACCATGCACACCG	Standard	YDL191W::chr4_3:dntag	194.2	220.25	248.6	281.4	193.8	379.6	251.8	356.6	124.2
AGGGATTAAGAAGGTCTACC	Standard	YCL052C::chr3_1:uptag	51	56.6	53.4	52.6	50.6	62.2	53.6	57	47.8
AGGGCAAATTGGAGACACCC	Standard	YGR158C::chr7_5:uptag	59.8	57.4	60.25	75.2	58.2	70.6	62.6	70.4	48
AGGGCCAGACAATACACCGT	Standard	YLR118C::chr12_2:uptag	166	112.4	282.6	203	145.6	353	238.8	264.6	95.8
AGGGCCGTAAAGTTGTTATC	Standard	YCL053C::chr3_1:uptag	57	61.4	72.6	69.6	73.2	78	80.4	83.6	58.4
AGGGCCTGAAATTCTCCCAA	Standard	YGR030C::chr7_4:dntag	45.6	43.8	47.2	43.8	43.6	53.6	47.6	49.8	42
AGGGCTACAGAAGAATCTCT	Standard	YGR159C::chr7_5:uptag	88.75	77	92.2	100.6	88.2	94.8	98.6	99	62.2
AGGGCTCTAAATGGTTCACA	Standard	YLR185W::chr12_3:uptag	90.25	89.6	71	101	70.6	114.2	98	149.2	60.8
AGGGCTTCAAATGTCTCCAA	Standard	YGL255W::chr7_3:uptag	111.6	93.75	146.6	84.4	44	217.2	66.8	71.8	67
AGGGTAACATAGCATACGCG	Standard	YGR160W::chr7_5:uptag	69.4	66.4	81	80.4	73.6	92	89	83	59.6
AGGGTAAGAACCTATACGCC	Standard	YJL135W::chr10_1:uptag	1546.2	1368.8	1516.4	1826	1751.6	1844.2	2107.8	1870.6	1082.4
AGGGTCAACCAGGACACACT	Standard	YLR119W::chr12_2:uptag	153.8	138	297.8	274.8	149.8	458.8	282.5	325.2	108
AGGGTCGAACAGTCATCAAC	Standard	YJL134W::chr10_1:uptag	1364.2	1285.2	2160.8	2069.8	1892.4	2515.6	2056	2054.8	1025
AGGGTCTTAACAGTCGCTAA	Standard	YJL133W::chr10_1:uptag	3646	2850.4	4661.8	4304.8	4144.4	4940.8	5093.4	4178.6	2261.6
AGGGTGAGAAATTGTACTCC	Standard	YCL054W::chr3_1:uptag	77.25	69.2	73.4	77.2	77.2	84.6	86	87.4	59
AGGGTGCCAACATCGCAGAA	Standard	YLR186W::chr12_3:uptag	330.4	200.4	554.5	430.8	292.6	706	518.2	526	185
AGGGTGGCAAATTCTCGACA	Standard	YLR187W::chr12_3:uptag	848.8	863.25	1236	1680.4	1396.4	1448.8	1332.75	1687.8	917.2
AGGGTGTAACATTAACCGCA	Standard	YGR161C::chr7_5:uptag	263	267.6	442.4	409.4	345.2	474.6	342	475.8	217
AGGGTTATAGACAACTCCAC	Standard	YGR162W::chr00_17a:uptag	65.25	61.6	75.4	69.6	66.8	76.6	82.2	70.8	54
AGGGTTCCAAATTAGGAGAC	Standard	YDR500C::chr4_8:dntag	714.6	693.5	846.75	954.6	775.8	952.8	656.75	1186	607.6
AGGTAAACACCAACTCCTGG	Standard	YGR163W::chr7_5:uptag	3719.75	3060	3495.25	3265.6	2621.6	3143.6	3234	2785.6	1921
AGGTAACATATCTACACCCG	Standard	YJL181W::chr10_1:dntag	2456.2	2202.6	2905.2	3182.75	3355	3005.6	3481.2	2785	2297.4
AGGTAAGCAACGATACGTCC	Standard	YJL182C::chr10_1:dntag	1679.75	1499.8	2181	2285	1918.2	2233.2	2061.4	1690.4	1508.8
AGGTAATAAGAAGGCGTCTC	Standard	YJL180C::chr10_1:dntag	68.8	58.8	76	74	69.6	85.2	83	76.8	57.8
AGGTAATCAACCCATATCCG	Standard	YDL192W::chr4_3:dntag	155.25	204.6	105.5	234	109.8	186.8	153.5	262.2	249.8
AGGTAATGAACGAGATCGCC	Standard	YJL179W::chr10_1:dntag	62	56.6	65.4	64.2	71.8	72	68.6	67.6	51
AGGTACAAAGACAGCCCGT	Standard	YGR164W::chr7_5:uptag	340.4	214	617.2	428.4	286.8	673.8	554	536.8	187.8
AGGTACAGAACCCACTACGG	Standard	YJL130C::chr10_1:dntag	719.4	609.25	1342.8	1042.6	1153.4	1266.2	853.6	848.6	499.6
AGGTACTAACAGTTCACACC	Standard	YJL129C::chr10_1:dntag	89.8	82.4	103.2	84.2	87.2	119	104	94.4	66
AGGTAGACAAGCAGACGTTC	Standard	YJL128C::chr00_15:uptag	264.5	204.8	291.75	244.6	211.4	372.4	279.4	319.8	215.4
AGGTAGAGAAGACACGTTCC	Standard	YJL077C::chr10_2:uptag	2422.4	2350.2	2281.2	2336.4	2489.2	1915	1911	2082.6	1352.6
AGGTAGATAACGCTAGATCC	Standard	YJL076W::chr10_2:uptag	53.5	49.2	54.25	48.6	50.2	58.8	54.6	57.6	46.2
AGGTAGCAACCATGACTAGC	Standard	YJL075C::chr10_2:uptag	111.2	75.2	81	89	72.4	111.4	115.5	92.4	59.2
AGGTATCTAACATCAGCACC	Standard	YJL124C::chr10_2:dntag	245.2	255.8	425.8	481.6	243.8	691.6	379.8	465.6	189
AGGTATGAACCATCGCACAC	Standard	YJL123C::chr10_2:dntag	844	700.8	1140.8	1520.8	1100.6	1571.4	1057.6	1357.4	608.8
AGGTCAACCATAGCACACGG	Standard	YGR166W::chr7_5:uptag	349.4	201.8	673.8	482.4	311.2	771.8	635	570	203.8
AGGTCACAAGACGACAGCTC	Standard	YJL122W::chr10_2:dntag	355.8	206.2	623.4	445	296.4	724.6	568.2	537.2	205.8
AGGTCACTAACATCTATCCG	Standard	YJL120W::chr10_2:dntag	1037	1196.6	1274.8	1082.6	826.8	1407.8	1578.2	1418.4	1014
AGGTCATAACAGTTGAGACG	Standard	YJL071W::chr10_2:dntag	79.4	79.4	90	91.25	78	104	103.4	102.4	62.6
AGGTCATGCAAGTAACGATC	Standard	YJL070C::chr00_15:dntag	3155.4	2905.8	3880.2	4089.4	3896	4448.6	3424.8	4050.6	3678
AGGTCCACAGAACTCAAGCT	Standard	YLR120C::chr12_2:uptag	325.6	217.2	581.6	414.6	294	648.2	521.8	500.4	175.6
AGGTCCAGAAATTGCTGCAC	Standard	YDR501W::chr4_8:dntag	833.2	659.4	1037.2	1055	1114	1296.2	1235.6	1210.6	1030
AGGTCCGCAAATTCTGAGAC	Standard	YCL055W::chr3_1:uptag	1991.5	2024.8	3225.4	3043.6	3155.4	3661	3110.4	3365.2	1224.6
AGGTCCGTAACAGTAGCACA	Standard	YJL069C::chr10_2:dntag	142	97.6	215.6	169.2	114.4	269.6	197.6	205.2	105.4
AGGTCGAGAGAACGTCACAT	Standard	YJL068C::chr10_2:dntag	3071.6	3013.5	3826.4	3498.2	3409.6	4279.6	2947	3375.2	3047.4
AGGTCGCAACAGTGGTACAA	Standard	YIL012W::chr9_1:uptag	284.2	239.8	606	513.8	454.8	812	546.4	713.2	165
AGGTCGTTAAGAGGCAATAC	Standard	YIL013C::chr9_1:uptag	255	205.4	408.6	481.6	482.8	554.6	540	534.8	232
AGGTCTTCAACATGAGGACA	Standard	YNL077W::chr14_3:uptag	662.75	635.2	1006.8	676.4	700.2	955.8	677.2	900.4	394
AGGTCTTGACAATAAGGACG	Standard	YIL014W::chr9_1:uptag	441.4	403.8	624	715	701	860.4	686	838.2	382.2
AGGTGAAATTGGTAGAACCC	Standard	YGR167W::chr7_5:uptag	68.25	64.8	71.75	72	66.4	74	75.8	79.8	54.2
AGGTGAATAACGCATACGCC	Standard	YIL015C-A::chr9_1:uptag	2666.2	2500.6	3289.6	3539.6	3657.2	3635.8	3632.6	3583.4	1605
AGGTGACCAAATCTTGTCCA	Standard	YLR188W::chr12_3:uptag	1868	1346	2004.75	1657	1563.2	2101.2	2082.8	2003.8	1138.8
AGGTGATTACAACGAATGGC	Standard	YCL056C::chr3_1:uptag	98.8	103.2	148	149	150.4	174	137.2	157.4	80.6
AGGTGCGTACAAATGCTATG	Standard	YGR168C::chr7_5:uptag	1534.75	1289.75	1830.6	2289.2	2383.6	2135.4	2164.6	2437	922.2
AGGTGCTAACCAGCTCTAAC	Standard	YIL062C::chr9_1:uptag	68.4	69.4	99.8	97.8	75.4	100.2	99.2	94.4	56.4
AGGTGGCCCAAGGAACTTAC	Standard	YDR502C::chr00_17a:dntag	2568.75	2740.8	2429.75	3202	2993	3221.2	3036.4	3312.4	2447.4
AGGTGGTTAAATTGGTCCCA	Standard	YGL256W::chr7_3:uptag	1534.4	1675.6	1481	1930.4	1552.6	2004.2	2028.6	2203.2	1367.6
AGGTGTACCCAACATGCAGA	Standard	YGR169C::chr7_5:uptag	796.8	953.4	1327	1298.4	1190	1523.8	1137.75	1309.2	682.4
AGGTGTATAGAAGCAATCCG	Standard	YGR170W::chr7_5:uptag	2481.2	2379.2	2656.4	2856	2493.2	3300.6	2612.2	3067.4	1444
AGGTGTCGAAATGGCATACA	Standard	YNL076W::chr00_16b:uptag	151.6	135.25	178.2	216.4	170	241.8	243.2	212.4	171.4
AGGTGTTAAGCAGGAATCAC	Standard	YGR171C::chr7_5:uptag	75.2	59.6	74.2	72.2	64.8	86	77.2	72.2	53.2
AGGTTAAGATAATCACCGCC	Standard	YCL057W::chr3_1:uptag	1491.2	1265.6	1921	1755.2	1250.2	2131	1875.2	2014.8	808
AGGTTACGAACATGACAGCC	Standard	YIL063C::chr9_1:uptag	266.2	159.4	412.5	311	192.4	523.2	388.333	408.6	143
AGGTTATACGAACGACCACC	Standard	YGR172C::chr7_5:uptag	91.6	75	88.6	80.4	82.2	109	110.6	103.8	62.6
AGGTTCATACAACGTCAGAC	Standard	YIL064W::chr9_1:uptag	103	79.8	112.2	90.8	79.6	141.8	125.2	110.6	67.8
AGGTTCCCAACATCACGAGA	Standard	YNL075W::chr14_3:uptag	106	96.8	156.8	128.8	111.2	215	155.2	158	67.8
AGGTTCTCACAAATGTCAGG	Standard	YDL193W::chr4_3:dntag	89.6	63.8	97.8	85.8	69	83.2	89	83.6	58.2
AGGTTCTGAAGACAACTTGC	Standard	YDR427W::chr00_11:uptag	61.4	64.4	67.4	68	62.4	78.8	66.4	68.4	51
AGGTTGAGACACACACATCG	Standard	YIL065C::chr9_1:uptag	1011.4	702.8	458.8	351.4	479	603.8	378	678.6	698
AGGTTGTGAACAGTGTCATC	Standard	YJL074C::chr10_2:uptag	84.4	67.8	89.4	88.4	88.4	91.2	101	87	56.6
AGGTTTATAGAACGCGAGCA	Standard	YGR173W::chr7_5:uptag	553	565.25	558.8	800.6	649.6	745.4	613.2	703.8	475.2
AGGTTTGAACGACAAGACGT	Standard	YGR174C::chr7_5:uptag	3199.4	3177.6	3863.6	3898.8	3676.4	4109.4	3672	3988.8	2103
AGGTTTGGAACATCGAGACA	Standard	YNL074C::chr00_16b:uptag	3081.2	2780	3154.2	2578	2411.2	3114	2772.8	2892	1978.6
AGTAAACTCAAGACCTCCTG	Standard	YGR175C::chr7_5:uptag	59.2	60.4	67.2	64.4	57.2	81.6	78.2	75.8	51.8
AGTAAATGTGCTCAACCCGA	Standard	YGR176W::chr7_5:uptag	614.8	639.8	1012.4	825	726.8	1091.8	784.4	813.6	378.8
AGTAAATTGTAATCCCGCCC	Standard	YGR177C::chr7_5:uptag	3367.2	3100.6	3539.6	3407.4	3061.6	3495.4	3370	3619.8	2203.6
AGTAACAGTCGTGAACATCG	Standard	YIL016W::chr9_1:dntag	2535.2	2341.8	4141.8	3878.4	3607.6	4298.8	3076.2	3737.8	2159
AGTAACATCTCGACAACGCG	Standard	YIL017C::chr9_1:dntag	88.75	91	104.2	104.2	91.2	113.2	105.2	110.4	73.2
AGTAACGCACATACACCTGT	Standard	YIL018W::chr9_1:dntag	56.25	56.2	97.2	82.8	69.8	111.6	111	83.4	54.6
AGTAAGAGAACTGACCGTCC	Standard	YIL019W::chr9_1:dntag	56.5	55.2	59	61.6	59.8	63.8	66.2	65.2	54.4
AGTAAGGCAACCCACGCAGT	Standard	YGR178C::chr7_5:uptag	545	511	993.2	977.6	742.2	1233.8	942	989.2	494.4
AGTAAGGGAACATCGGTATC	Standard	YIL067C::chr9_1:dntag	558.5	785.25	1026.6	783.8	702	1059.8	670.4	740.8	296
AGTAATCAACGCGAACTCCG	Standard	YIL068C::chr9_1:dntag	78	64.25	72.2	69.4	64.8	81.2	68.6	82	50.6
AGTAATGCAACCCGACCTAG	Standard	YIL069C::chr9_1:dntag	89.4	81.4	101.4	106.8	82.4	124.2	107.75	123.4	67
AGTAATTGAACAGGTCAGCC	Standard	YCL059C::chr3_1:uptag	73.4	77	95	92.8	83.6	89.6	105	100	64
AGTAATTTAACTAGGGCGCG	Standard	YIL070C::chr9_1:dntag	52.6	53.6	55.6	53	54.8	60.8	58.4	58.8	43
AGTACAGCAACGCAGAGCCT	Standard	YEL023C::chr5_2:dntag	346.25	217	630.4	439	292.6	716.4	550.8	533	195.4
AGTACATTAACCTACGCGAC	Standard	YEL024W::chr5_2:dntag	66.4	66	62.2	63	62.4	69.6	70	62.6	54.4
AGTACCACAACTCAGACGTG	Standard	YEL071W::chr5_2:dntag	463.75	383	868.8	738.4	648	876.6	784.4	819.2	394.4
AGTACCAGAACGCACGACGT	Standard	YEL072W::chr5_2:dntag	202	137.4	282.4	212.6	169	353.4	237.4	229	120
AGTACCTAACATCGTAGACC	Standard	YLL029W::chr12_1:uptag	122.8	117	264.2	198.2	266.4	247.4	294.5	435.6	92.8
AGTACCTCAACCCAGTTAGA	Standard	YLL030C::chr00_8:uptag	230	132.2	430.2	284.6	160.8	515	376.8	387	128
AGTACGAACCGCGACACAGT	Standard	YLL031C::chr12_1:uptag	209.6	140.6	430.4	284.4	153.2	500.8	368.4	377.2	135.4
AGTACGAGAACCGATGAGCC	Standard	YLL032C::chr12_1:uptag	2518.4	2958.4	3945.8	3835.8	3918.2	3980	4432.8	3725.8	1416
AGTACGGAACATGACGACCG	Standard	YLR014C::chr12_1:uptag	2042.6	1761.2	2161.6	2670.8	1841.6	2462.8	2507.2	2501.4	1161
AGTACGTCACAGAACTGAGC	Standard	YLR015W::chr12_1:uptag	321.4	208	599	401.4	297	650.8	532.2	503.6	192.6
AGTACGTTAAGATAGACCCG	Standard	YLR016C::chr12_1:uptag	3786.2	3614.8	3035.4	3509	3685.8	3692.6	3507	3837	1947.8
AGTAGAAACATCGAGTCGC	Standard	YLR017W::chr12_1:uptag	117.4	108.8	150.2	165	146.2	255	138.2	150.2	115.6
AGTAGACTAACCGATATGCC	Standard	YLL037W::chr12_1:dntag	62.4	64.4	72.8	69.6	72.6	83	79.6	71.4	55.2
AGTAGCCGAACCGAACGGAT	Standard	YLL038C::chr12_1:dntag	1290	1427.8	2109.8	1655.8	1650.8	2031	1773.6	1954.8	1009.6
AGTAGCGTAACCAGTCGAGA	Standard	YLL039C::chr12_1:dntag	267.4	419	531.4	336.2	308.8	1067.6	293.25	400.2	249.8
AGTAGCGTAACCAGTCGATA	Standard	YIL083C::chr9_1:dntag	163.2	273.8	286.8	181.8	168.2	664.4	166.25	209.4	190.8
AGTAGGAGAACGAATTGTCC	Standard	YLL040C::chr12_1:dntag	1688.5	1736.2	1878.4	2594.2	1712.6	2627	2149.75	2641	820.2
AGTAGGCCAACCCAGCGATA	Standard	YNL073W::chr00_16b:uptag	347	223.4	660.4	468.4	332.8	763	652.75	601.8	200.8
AGTAGGTAACCCACTCACAG	Standard	YLR022C::chr12_1:dntag	254	138.8	542.8	369.8	203.2	657.6	501	482.4	153.8
AGTAGTAACCATTAAGCCGC	Standard	YLR023C::chr12_1:dntag	263.5	262	555.6	540.75	410.2	598.6	451.2	524.2	168.8
AGTAGTAGAACCTAGTAGCC	Standard	YLR024C::chr12_1:dntag	1257	1201.2	2239.4	1962.6	2361.8	1936	2167.75	2026.2	1455
AGTAGTCCAAATTCGGGTAC	Standard	YLR025W::chr12_1:dntag	68	63.6	80.8	77.2	74.2	110.2	92.4	77.8	63.2
AGTATAGAAGGCAAGCCCGC	Standard	YCL060C::chr3_1:uptag	109.4	79	194.8	141.2	98.4	245	174.4	172	81.6
AGTATAGCAACCTCAACTCG	Standard	YOR332W::chr15_4:uptag	102.4	88.8	108.2	112.25	103.2	121.6	116.2	119	76.2
AGTATATTAACCGCCCACAG	Standard	YOR333C::chr15_4:uptag	434.8	300.6	737.4	565.6	367.4	851.8	699.6	665.2	293.2
AGTATCGAACATGAGGTACG	Standard	YOR334W::chr15_4:uptag	2327	2674.8	4162.8	3749.6	3682.4	4151.8	4267.4	3760.8	1895.6
AGTATCTAACCATCCTGACG	Standard	YOR335C::chr15_4:uptag	50	56.25	62.6	58	55.8	65	60.8	55.8	45
AGTATCTGAACATCGTCACC	Standard	YOR383C::chr15_4:uptag	1899.4	1823.4	2387	2054.4	1896.6	2617	2641.6	2543.6	1460.6
AGTATGGTAACCGAGCGACA	Standard	YOR289W::chr15_4:dntag	2294.2	2817	3049.6	3465.6	2389	3629.6	3307.6	3484.4	2570.4
AGTATTAACGACAGACCCTC	Standard	YGR179C::chr7_5:uptag	259	178.2	485.2	352	230.4	565	427	439.6	154.8
AGTATTATAGAACTCGCGGC	Standard	YGR180C::chr7_5:uptag	69.4	65.6	72.8	73	69	74.8	76.2	76.6	58.8
AGTATTCCAAATTGCCCTCG	Standard	YGL129C::chr7_2:uptag	98.8	72	119.2	109.6	85.2	127.5	140.2	135.8	61.4
AGTCAAGGAAGAAGCTGTCC	Standard	YCL061C::chr3_1:uptag	680	869.4	938.8	1188.8	1227.4	1322	1049.2	1291	381.2
AGTCACACAATACACTCTGG	Standard	YOR290C::chr15_4:dntag	73.6	65.2	80.4	67.2	62.8	89.8	73.6	83.2	60
AGTCACAGAAGCACACGTCG	Standard	YOR291W::chr15_4:dntag	473.75	408.4	902.2	739.4	704.2	1184.2	887.4	936.8	505
AGTCACCCAACCGAAGGAGT	Standard	YLR121C::chr12_2:uptag	2029.2	1885	2869.8	2582.4	3138.6	3297.4	2678.75	3016.2	1544
AGTCACGAACCCTACGGAAG	Standard	YOR339C::chr15_4:dntag	1762.2	2251	2653.75	2489	1798.6	3474.2	2950	2647.8	1706.2
AGTCAGGACGAATTGTTCA	Standard	YFL042C::chr00_15:dntag	2151	1200.5	1912.2	1718.2	1263.8	2161	2429	2288.8	1674.4
AGTCAGTCAACATGCTAGAC	Standard	YOR340C::chr15_4:dntag	104	78.6	134.6	109.2	83	175.8	121.8	139.8	70.2
AGTCAGTTAAGATCAACGCC	Standard	YOR341W::chr15_4:dntag	67.4	72	80.4	74.2	73.4	102	100	80	55.6
AGTCATAGAACGCTAGGACC	Standard	YOR342C::chr15_4:dntag	1234.6	1250.2	1989.2	1317	1531.2	2302.2	1764	1989.2	1772.8
AGTCCATGACAACGTACACT	Standard	YDL227C::ctrl_32:uptag	3912.8	3739.4	3626	3704.6	3396.4	3812.8	3954	4145.2	2093.2
AGTCCCTGAACATCCTTAGA	Standard	YNL072W::chr00_16b:uptag	1878.2	1590.6	2328	2088.2	2072.2	2172	2271.6	2432.2	1199
AGTCCGAACCATACTACAGG	Standard	YGR181W::chr7_5:uptag	74.25	63.25	80.8	88	82.4	89.4	85.6	84	65.8
AGTCCGTGAAATTGTTCCAC	Standard	YCL062W::chr3_1:uptag	1098.6	1574.75	1714	1608	1430.4	2153.4	1985.2	2221.2	1038.2
AGTCCTAACCCAGCTTAATG	Standard	YGR182C::chr7_5:uptag	427.4	349	649.8	554.4	461	823.8	568.6	592.2	323.8
AGTCCTATACAAGAGGCACC	Standard	YGR183C::chr7_5:uptag	1649.6	1698.2	2545.6	2216.8	1977.6	2520.2	2543.4	2281.4	846
AGTCCTCTAAATGTGGTACG	Standard	YOL040C::chr15_5:uptag	58.75	67	84.8	99.8	97.2	99	109	92.2	70
AGTCCTGAAGAACTACAGTC	Standard	YGR184C::chr7_5:uptag	197.4	254.6	389.6	462	462.2	470.8	386.6	337.8	179
AGTCCTTCAAATGGAGAGAC	Standard	YCL063W::chr3_1:uptag	209.4	198	303	270.8	208.6	314.6	273.4	329.8	142.8
AGTCGATAAGAATACTGCGG	Standard	YOL041C::chr15_5:uptag	1206	1470	906.8	1835	1687.2	1686.2	1015	2423.8	619.6
AGTCGCACAACATTACTACG	Standard	YOL042W::chr15_5:uptag	68	71.4	72.4	76.4	70.2	95	89.8	74.2	54.4
AGTCGCATAAATTGATCGCC	Standard	YCL064C::chr3_1:uptag	64.6	61.8	75	73.2	67.4	83.4	77.2	76.6	54.2
AGTCGCCTAACATGCAGTAA	Standard	YOL043C::chr15_5:uptag	3208.25	3129	3862.5	4374.2	4088.6	3986.8	4560.6	4277.6	1799.8
AGTCGCGCACAGCAACGTAT	Standard	YOR386W::chr15_5:dntag	356.5	254.6	623.8	460	347	740.4	552.4	594	246.8
AGTCGCGGAATTGGTTACA	Standard	YNL071W::chr00_16b:uptag	85	84.6	111.75	131	134.6	143.4	113.6	128.2	81.8
AGTCGCTAACCATAAGACCT	Standard	YDL227C::ctrl_33:uptag	4795	4330	4626.6	4779.6	4633.8	5119	5087	5154.2	2277.8
AGTCGCTTAACATCGGTTCA	Standard	YGR185C::chr7_5:uptag	94.25	92	125.2	123.2	112.6	152.4	167	125.2	103.8
AGTCGGGACCATATACAGCC	Standard	YGR186W::chr7_5:uptag	232	153.2	407	302.4	169.2	530.6	373	367.6	146.6
AGTCGGTTAAGAGCGCATAA	Standard	YOL040C::chr15_5:dntag	101	85.2	132.2	119.8	94.4	136.4	152	130	105.4
AGTCGTACAGAACTCGATAC	Standard	YOL041C::chr15_5:dntag	433.6	720	593.8	1101.8	1075.4	1127.6	680.8	1451.4	515
AGTCGTCAACAGGTGAGAAT	Standard	YGR187C::chr7_5:uptag	76.8	66.6	84	101.4	84.8	99.4	92.5	93	65.4
AGTCGTCGAAATTAGTAGCC	Standard	YOL042W::chr15_5:dntag	3480	3706.2	2422.4	4369.2	3356.4	3651.4	4616.8	4519.2	4466.6
AGTCGTGAAGAACTCATACG	Standard	YOL043C::chr15_5:dntag	1007.2	775.8	1180	1620.8	1315	1413.2	1437.6	1390.4	1128
AGTCGTGTAACCATGTGACA	Standard	YOR003W::chr15_1:uptag	3032.5	2748	3543.6	3334	2968.8	3744.2	3759.8	3686	1997
AGTCGTTTAACTGAACCGAG	Standard	YOR004W::chr15_1:uptag	60.8	62	67.2	75	60.8	75.8	77.2	76.4	54.4
AGTCTACAACATTAGCACGC	Standard	YOR005C::chr15_1:uptag	3081.2	3051.5	3604.4	4923	4679.2	4184.4	4501.6	4481.4	1888.4
AGTCTAGCAGAACGACAGCT	Standard	YOR006C::chr15_1:uptag	304.8	192.2	532.8	401	265	614.4	477	476.6	193.8
AGTCTCAACCCATCAGAAGG	Standard	YGR188C::chr00_10:uptag	529	607	764.8	973.8	713.8	1218	732.4	777.2	328
AGTCTCTAACCAGATATGCG	Standard	YGR189C::chr7_5:uptag	1795	1753.8	2077	2015.8	2104.8	2157	2066	2232.6	1072.4
AGTCTCTGACAACATTGAGC	Standard	YOR056C::chr15_1:uptag	73	66	66.2	76	67.2	76.4	71.4	78.4	58.8
AGTCTGACAGCAACTAATCC	Standard	YGR190C::chr7_5:uptag	151.4	218.6	217.2	134	118.8	265	205.6	202.4	93.2
AGTCTGAGAGAAGAGATCCT	Standard	YGR191W::chr7_5:uptag	57.2	58.4	71	66.6	68.6	74	75.6	68.8	51
AGTCTGTTAAGATATGCGCC	Standard	YOR058C::chr15_1:uptag	2163.8	2339	1702.8	2685.8	2346.4	3122.4	2748.8	3128	536.6
AGTCTTAACCGACGCACAAG	Standard	YGR192C::chr7_5:uptag	271	223	414.4	396	292.2	559.6	374	374.8	240.2
AGTCTTATACAGCGAACTCG	Standard	YOR011W::chr15_1:dntag	990	826.2	1533.6	1286.4	1271	1406.2	1346.4	1294	623.8
AGTCTTCAAATTCTCTGCG	Standard	YDL194W::chr00_16b:dntag	57.4	61	66.2	67.2	61.2	71.8	72.75	74.2	47.8
AGTCTTCGAGAACAAACCCG	Standard	YOR012W::chr15_1:dntag	951.6	782.4	1351	1202	874	1343.6	1210	1365.2	1018
AGTCTTGGAACAGTGAGTAC	Standard	YOR013W::chr15_1:dntag	1499.6	1548.8	2379.6	2351.8	1911.2	2209	2129.25	1786	1609
AGTGAAGAAGAATGCGTCCT	Standard	YLR122C::chr12_2:uptag	2801.6	2620.4	2593.4	2889.4	2724.6	3215.2	3156.6	3339.2	1769.6
AGTGAAGGAACCTGAATTGC	Standard	YDR503C::chr4_8:dntag	2683	2126	2956.8	2491.4	2410.2	3020.6	2961.4	2877.8	2568.8
AGTGACAACCCGACTGAACG	Standard	YOR014W::chr15_1:dntag	837.8	813.4	799.4	552.4	347.6	575.4	481	517.2	341
AGTGACACAAGCGCAGACCT	Standard	YOR062C::chr15_1:dntag	426.8	308.2	780.6	676.2	571.8	977.2	603.6	702.6	326.2
AGTGACCCAACATTATAGCG	Standard	YOR063W::chr15_1:dntag	70	63	77.8	82	66	87.8	90	73.8	58.8
AGTGACGAACATCTAGTACG	Standard	YOR064C::chr15_1:dntag	1325	1099.4	1458.8	1938.4	1353.2	1989.2	1412.4	1577.6	1531.6
AGTGACTTAACATTGGACCC	Standard	YDL227C::ctrl_22:dntag	5965.4	5391.4	5324.4	5351.4	5376.4	5595.4	5661.6	5907.8	4531.6
AGTGAGAACCCATCATACCG	Standard	YOR065W::chr15_1:dntag	1431.8	1914.2	2856.8	2620.2	3015.8	2500.4	2786	2758.2	1276.2
AGTGAGATAACCTTACCCAC	Standard	YHR062C::chr8_2:uptag	60.6	61.2	79.2	66.6	61.6	78.8	71.2	77.8	52
AGTGAGCAACCCGCCAGAAT	Standard	YGR193C::chr7_5:uptag	313.2	191	560.75	399.6	291.6	654.4	509.6	497.6	192.8
AGTGAGGTACAACGACGCAC	Standard	YDL227C::ctrl_37:dntag	6832.4	6513.4	5552.2	5945.4	5909.8	5798.8	6094.6	6112	4584.6
AGTGAGTGAACCGACGCTAA	Standard	YHR064C::chr00_8:uptag	68	80.4	76	81.2	71.4	84.6	96.2	84	61.4
AGTGATCGAACAGTTGCGAA	Standard	YGR194C::chr7_5:uptag	2050.2	2241.2	2988	3524	2977.6	3169.8	3369.5	3409.6	1350.8
AGTGCAACCAGTGTGAACCA	Standard	YGR195W::chr7_5:uptag	94.6	85.8	89.8	101.8	90.2	100.6	103	101.6	60.6
AGTGCAAGAACGGTAGCCAC	Standard	YHR065C::chr8_2:uptag	162.25	117	273	184.4	115	351.2	242.8	245.4	99.2
AGTGCAGTAACAGTGCGTAA	Standard	YHR113W::chr8_2:uptag	1440.5	1472.2	3029.2	2624.2	2341.2	2929.4	3014	2169.2	1095
AGTGCATAAGAATATCCCGG	Standard	YDL195W::chr4_3:dntag	51	51.4	55	53.6	47.6	56.2	57.8	54.4	42.4
AGTGCATCACAAGAGACTCG	Standard	YGR196C::chr7_5:uptag	224.5	188.4	384.4	369	299.6	444.2	378.2	397.4	178.6
AGTGCATGAACAGGTGATAC	Standard	YHR114W::chr8_2:uptag	113.8	120	124.8	156.4	136.6	158.8	117.5	132.2	89.4
AGTGCCAGACACACAGAGCT	Standard	YHR115C::chr8_2:uptag	313.4	221.6	567	439.4	293.8	658	502.8	480.8	258.2
AGTGCCATACAAGCGCATAG	Standard	YGR197C::chr7_5:uptag	160.6	110.8	331	237.6	136.8	425.4	304.2	285	110.2
AGTGCGAGAACATCGTGTAA	Standard	YHR116W::chr8_2:uptag	1455.75	2051.6	2664.6	3315.4	3174.2	3387	2718.6	3293	1457.6
AGTGCGATACAATACGAGCG	Standard	YHR068W::chr8_2:dntag	78.6	82	75.8	91.4	82	88.4	96.2	88.6	67
AGTGCGCCACAGAAGAGACT	Standard	YHR069C::chr8_2:dntag	281.8	183.4	528	359.6	266.6	580.4	491.4	456.2	159.2
AGTGCGCGAAATGTTCTACA	Standard	YHR070W::chr8_2:dntag	59	58	63.6	68.4	62.6	70.6	67.6	68.4	52
AGTGCGTTACAAGAAGCAGT	Standard	YGR198W::chr7_5:uptag	98.2	87.6	129.8	136.2	110.2	165.8	166.6	138.8	77.4
AGTGCTAGAAATACTCAGCC	Standard	YHR120W::chr8_2:dntag	150.5	106	264.2	191.4	105.2	375.2	255	284.8	94.6
AGTGCTCAACGACAACTACT	Standard	YGR199W::chr7_5:uptag	1491.75	1465.6	2205.2	2080	2225.8	2477.6	2447	2257.2	950.2
AGTGCTGGAACATTATTCGC	Standard	YDL227C::ctrl_23:dntag	5711.8	5202.2	4723.2	4920.2	4972.6	5123	5054.4	5258.4	3640.4
AGTGGAACCGAAGATACCGT	Standard	YHR121W::chr8_2:dntag	2020.5	2547.2	2796.6	3123.4	2682.2	2661.2	2747	2851.8	2439.2
AGTGGAGGAACCGTCAATAC	Standard	YHR122W::chr8_2:dntag	64.2	72.5	80.4	77.4	77	91.8	80.8	79.2	62
AGTGGATAACATTGATCGCG	Standard	YGR200C::chr7_5:uptag	477	361.6	283.2	574.4	363	637.8	344.4	358.8	250
AGTGGCCTACAAATTGCATG	Standard	YGL130W::chr7_2:uptag	55.6	52.4	53.4	53	53.2	61	56.8	58.4	44
AGTGGCTAACCATTCCAGAA	Standard	YGR201C::chr00_10:uptag	1280.6	1042	1722.5	1313.8	1264.6	1572.2	1372	1510.2	891
AGTGGGAGAACCGCACCATA	Standard	YNL070W::chr00_16b:uptag	1573	1727	2194.8	2232.2	2247.6	2408.6	2678.75	2413.8	1080
AGTGGGCGAACATTGATACA	Standard	YNL069C::chr14_3:uptag	983.4	1131.2	962.6	1820	1193.8	1462	1609.4	1703.2	837.8
AGTGGTACAGAAGACCGACT	Standard	YHR123W::chr8_2:dntag	100.8	81.6	96.4	89.2	81.4	115	108.2	92.6	66.2
AGTGGTATAACAGCCAGCAC	Standard	YBR296C::chr00_1:uptag	314.25	199	590.4	412.2	288.6	654.4	502	515.8	182.2
AGTGGTCAACAGTTCGAGAC	Standard	YBR297W::chr00_1:uptag	1853.67	1587.4	2190.8	2306.2	2249	2975.4	2545.75	2926.6	1303.4
AGTGGTGCAGAACAAAGCCC	Standard	YGR202C::chr7_5:uptag	2736.25	2651.4	3341	3844.6	2864.6	3624.4	3491	3186.6	1348.4
AGTGGTGTACCCGAAGACAA	Standard	YBR298C::chr00_1:uptag	2300	2279.25	2699	2274	2481.2	2815.6	2502.8	2907.4	1433.8
AGTGTCCAACCAGACCAGAG	Standard	YBR300C::chr00_1:uptag	325	201.2	613	415.4	288	690	553	510.8	187.2
AGTGTCGTACAACCGATTAC	Standard	YCR076C::chr00_1:uptag	2545.4	2354.4	2960.25	2833	2858	2935.2	3365.2	3453.2	1578.8
AGTGTCTCACAACGAGCGAC	Standard	YCR077C::chr00_1:uptag	131.6	131.6	145.4	151.8	104.4	234.4	150.4	215.2	106.4
AGTGTCTTAACCTAGTGACC	Standard	YCR079W::chr00_1:uptag	2353	2680.8	3115.2	2908.8	3106.6	3348.6	3614.2	3454.2	1711.4
AGTGTGAACGAAGCAGACTT	Standard	YGR203W::chr7_5:uptag	3314.2	3224.8	3815.4	3753.4	3719	4230.8	3599.6	3860.2	1885
AGTGTGACAGAAGACTACCT	Standard	YCR081W::chr00_1:uptag	173.8	230.4	638.8	616.8	221.8	799.6	223	484.8	165.2
AGTGTGAGAAATGTTGACCC	Standard	YCL069W::chr3_1:uptag	3086.6	2943.75	3517.25	3633.4	3275	3875.6	3409	3984.4	2070.4
AGTGTGCTAACATGGTCGAA	Standard	YCR024C::chr00_1:dntag	75	74.2	87.8	90.6	80.8	109.4	109.8	94.8	60
AGTGTGGAACCCAGCGTAAC	Standard	YCR024C-A::chr00_1:dntag	324	183	527.4	394.8	268	631	474.8	498	187
AGTGTGGGAACCGACATACA	Standard	YCR025C::chr00_1:dntag	2203.2	1894.6	3328.6	3647	3644.4	3897.4	4124.75	3898.8	2880.2
AGTGTGTAACAGTGTCTACG	Standard	YCR026C::chr00_1:dntag	1047.2	1252.8	2393.4	1769.2	1781	2592.8	2364.6	2234	1286.6
AGTGTTAAGCCAGAAGACCT	Standard	YLR123C::chr12_2:uptag	513	408.4	702.2	716.8	551.4	996.8	662.25	750	451.4
AGTGTTAGAACCACGATACC	Standard	YPL184C::chr16_2:uptag	929	901.8	1342.4	691.2	728.2	1545.6	1373.4	958.4	598.6
AGTGTTCAACCGAGCCGAAG	Standard	YDL227C::ctrl_54:dntag	2101.6	2252.2	1592.6	1744.8	1656	1831.6	1481.6	1615.8	1295.6
AGTTAAGCGCAACGACATCC	Standard	YGR204W::chr00_10:uptag	53	55	72	66.6	58.2	85.4	76.8	79.6	50.2
AGTTACCAACCGTACCTAAG	Standard	YPL181W::chr16_2:uptag	3619.6	3391	4597	3671.25	3607.4	4221.8	4145	4439.6	2123.8
AGTTACGAACCGGAAGGACC	Standard	YGR205W::chr7_5:uptag	3845.4	3626	4003.8	4113.2	3996.4	4396.2	4560.4	4343	2370.4
AGTTACGGAACCGCACGACA	Standard	YPL182C::chr16_2:uptag	110	105.8	124.8	120.4	104.6	140.6	132.4	122.4	80.6
AGTTACTCACCATGCTTCG	Standard	YGR206W::chr7_5:uptag	403.6	406	475.2	639.8	362.2	749.4	410	644.2	342.8
AGTTACTTAATACACCGCCG	Standard	YGR207C::chr7_5:uptag	774.8	869.2	1036.8	1006.5	1182.2	1296.4	893.8	878.8	499.6
AGTTAGACAAGCGACACTCC	Standard	YPL124W::chr16_2:uptag	79.8	70.4	106	96.2	78.6	112.4	108.2	100.2	57.4
AGTTAGTAAGCAAGAGCGTC	Standard	YPL123C::chr16_2:uptag	422	435.8	634.4	830.8	821.8	1139.6	765	996.6	460.2
AGTTAGTCACAACGGAATCG	Standard	YGR208W::chr7_5:uptag	2346.4	2927.2	3231.6	3207	2847	3109	3161.2	3343.2	1835.4
AGTTATAGAATACAGCCGCC	Standard	YPL122C::chr16_2:uptag	289	175.2	551	396.2	258.4	617.4	490	465.4	171.2
AGTTATCTAAGAACGGTGCC	Standard	YPL121C::chr16_2:uptag	636.8	634.4	998.6	853.6	920.8	1162.4	1151.6	1117	456
AGTTCAATAACGCTACAGCC	Standard	YPL161C::chr16_2:dntag	271	197.2	506.2	355.4	223.4	560.8	460.2	450.2	195.2
AGTTCACTAACCGGAATCAC	Standard	YPL160W::chr16_2:dntag	66.4	63.8	78.6	73.6	72.8	79.6	86	84.4	54.8
AGTTCATCAACCATTCGAGC	Standard	YER027C::chr00_11:uptag	3124	2620.2	2931	2602.2	2803.4	2978.4	3347.25	2523	2115
AGTTCATGCAATAAGAGCGC	Standard	YCL074W::chr00_12:uptag	1886.8	1576.8	2040.75	1825.6	1948.8	2307.2	2262.25	2353	1004.8
AGTTCCAGAAGACGAGACGC	Standard	YGR209C::chr7_5:uptag	1266.6	866.2	1924	1743	1576.2	2031.8	2283.6	1873	878.2
AGTTCCCAACCCGTATTAAG	Standard	YGR210C::chr00_8:uptag	2835.4	2510.4	2958	2622.2	2589.2	2865.2	3111.75	2960.4	1721.6
AGTTCCCGAAAGAGCCCAGA	Standard	YGR211W::chr7_5:uptag	289.8	185.8	554.6	441.8	277.4	644.4	567.75	522.6	175.4
AGTTCCGAAGCAACGTGAAG	Standard	YPL159C::chr16_2:dntag	1347.6	1098.6	1410	1489.4	991	2059.2	1561.6	1511.4	1572.8
AGTTCCGGCAATAACAAGTG	Standard	YDL196W::chr4_3:dntag	49.6	49.6	59.2	56.8	50.8	67.6	64.8	62.4	44.4
AGTTCGAGAGAAGACGATCT	Standard	YPL104W::chr16_2:dntag	119	131.4	145.4	157.8	127.6	143.4	151.8	155.6	125.8
AGTTCGATAAATTGTGGCCC	Standard	YDR504C::chr4_8:dntag	1801.6	1501.2	2265	1779.6	1472.8	2168.8	2166.6	2079.8	1933
AGTTCGGCAACCCTCAGAGA	Standard	YNL068C::chr00_16b:uptag	293.2	236.4	518.8	432.4	324.2	616.2	381.75	455.8	205
AGTTCGGGAAATGTTGCATC	Standard	YDR505C::chr4_8:dntag	72.2	75.8	104.8	84.4	64.5	112.2	85.4	110.6	67
AGTTCGGTAACATGGTGACA	Standard	YPL103C::chr16_2:dntag	844.8	663.6	889.4	1139	1020.8	1048.4	1677.6	1290.8	1018.8
AGTTCGTCAACATCGCCAGA	Standard	YGR212W::chr7_5:uptag	381.6	345	694.4	651.4	506.6	911.4	629	694.2	291
AGTTCTAACCGAAGTTCACC	Standard	YGR213C::chr7_5:uptag	1454.2	1960.6	1631.6	2301.2	1773.6	1776.6	1194.4	1742.2	1037
AGTTCTACAAATACGGAGCC	Standard	YPL101W::chr16_2:dntag	134	151.4	197.8	222	170	338.6	184.5	268	194.2
AGTTCTGACTCCTCATGCA	Standard	YBR146W::chr2_3:uptag	110	154.25	159.8	136.4	119.8	169.4	145	183.4	104
AGTTCTGTAACCCATCCAGG	Standard	YDL197C::chr4_3:dntag	959.25	1257.25	968.4	1691.8	1020.6	1159.5	1180.4	1559.4	868.4
AGTTGAATGCAGATAGCTC	Standard	YFR005C::chr6_1:dntag	53.75	49.2	54.8	57.4	50.2	64	60.75	57.2	42.8
AGTTGCACATCCAAGCACAT	Standard	YGR214W::chr7_5:uptag	269.2	167.333	514.8	382.8	224.8	612.4	481.8	467.8	156.2
AGTTGCATAACCCGCACTAA	Standard	YNL067W::chr00_16b:uptag	279.2	529.667	646.4	607.2	491	1087.8	454	508	395.6
AGTTGGAACCCGATGCAAGA	Standard	YLR189C::chr12_3:uptag	3405.25	3305.2	3998.75	4407	4448.4	4260.4	4370.5	4064.4	1776
AGTTGGCCCACGAACCGTAA	Standard	YNL066W::chr00_16b:uptag	331	226.5	529	567	497	515.8	394.8	452.6	197.2
AGTTGGCTAACACACCACAG	Standard	YPL102C::chr16_2:dntag	429.2	427	696.6	555.4	400.8	947.4	642.75	712.6	253.8
AGTTGTCAAGCAATACACCC	Standard	YCL075W::chr00_12:uptag	2293	2043.8	3010.6	2736.2	2350.4	2692	3060.4	2622.8	1247.4
AGTTGTCCAAGAAACCAGCT	Standard	YDR161W::chr4_5:dntag	673.6	522.8	550.75	763.4	603.2	851	912	1021.8	380.8
AGTTGTGTAACCCGGTAGAA	Standard	YNL196C::chr14_2:uptag	2284	2175.25	1506.8	2599.6	2499.4	2424.6	1971	2250.8	1298.2
AGTTGTTGAACCTACGGGAA	Standard	YNL065W::chr00_16b:uptag	737.2	1025.67	1291.4	1415.6	1299	1240.6	1092.8	1209	480.6
AGTTGTTTAAGATAGCCGCC	Standard	YCL076W::chr00_12:uptag	1268.2	1000.5	1489.8	1150.4	1201.8	1366.8	1479.2	1426.8	515.2
AGTTTATTAACGCACCAGCC	Standard	YCR001W::chr3_1:uptag	333.8	222.5	600.8	441.4	302.2	702.4	540	563.8	215.2
AGTTTCACACAATGACACGG	Standard	YGR216C::chr7_5:uptag	106.2	77.4	224	129.6	92.6	258.4	208.2	194.2	74.2
AGTTTCCAAGAAGAGACGGT	Standard	YGR217W::chr7_5:uptag	108.8	101	170.6	162.6	133.8	195.6	198	177	90.8
AGTTTCCCAAATTGTCGAGC	Standard	YDR506C::chr4_8:dntag	2153	2303.25	2414	2799.8	2727.2	2730.8	2734.33	2651.2	1636
AGTTTCCGAACGAAGACTAC	Standard	YNL195C::chr14_2:uptag	1380	1040.2	1305.6	1461	1152.2	1216.2	992	988.6	767.4
AGTTTGAGAACCCTATGACC	Standard	YGR218W::chr7_5:uptag	72.5	61.8	81	74.4	64.4	78.6	76.2	78.4	55.8
AGTTTGATAACAACACCCGC	Standard	YGR123C::chr7_5:dntag	2397	2580	3698.75	3721.2	2489.4	4305.4	4157.8	3848	2755.4
ATAAACAGCGATTACCCGGC	Standard	YGR124W::chr7_5:dntag	883.5	863.6	1088	832	818.8	1344.4	813.6	1045.2	626.2
ATAAACCCACAGACCGTGTT	Standard	YLR124W::chr12_2:uptag	362.6	232.4	699.5	490.6	350	747	654.4	612.4	210.2
ATAAACCGAACGTACCTCGT	Standard	YGR125W::chr7_5:dntag	1454.75	1609	1870.6	1354.6	945.4	2215	1815.8	1786.8	1085.6
ATAAACCTAATACCGTCGCG	Standard	YNL194C::chr14_2:uptag	2657.4	2411.4	2227.6	3118.4	3115.8	2822.8	2259.6	2174.2	1891.2
ATAAACGAACATTGGGTCCC	Standard	YGR126W::chr7_5:dntag	1652.8	1646.2	2176.8	2079.2	1937.6	2335	2612.8	2191.6	1694.6
ATAAAGAACCGCATCCCGTG	Standard	YGR127W::chr7_5:dntag	1911.6	1695	2405.5	2084	1652.2	2155.8	1708	2224.2	1378.4
ATAAAGGTCATGCCAACCGC	Standard	YGR128C::chr7_5:dntag	215.8	118	372	271	139.8	479.4	338.8	387.2	125
ATAAAGTAGATACCCGTCGC	Standard	YNL193W::chr14_2:uptag	2724.8	2466.8	2905.2	3129.4	2906.4	2693.2	2414.6	2767.2	2287.4
ATAAAGTGTTGACAAGCCCG	Standard	YDL198C::chr4_3:dntag	124	93	218.6	166.6	105.6	321.8	224.6	222	78.8
ATAAATCGAGTGAACCTCCG	Standard	YGR129W::chr7_5:dntag	2728.6	2206.4	3134.6	2793.8	2348.8	3128.4	3129.6	3335.2	2843.2
ATAAATGCTTGGAACCCTCG	Standard	YGR130C::chr7_5:dntag	467.8	495	852.2	730	619.2	988.8	610.2	868.8	734.8
ATAAATGGTATGAACGCCGC	Standard	YGR131W::chr7_5:dntag	2279.6	2185.6	2002.4	2191.8	1906	2274.8	2243.4	2439.2	1881.2
ATAAATGTCATGCACCACCG	Standard	YGR132C::chr7_5:dntag	1500.2	1512.6	1469.2	1180	1371.8	1554.8	1457.2	1507	1423
ATAAATTAGAAGCCGCCTGC	Standard	YGR133W::chr7_5:dntag	127	83.2	224	136.4	95	274.8	214.6	232.6	86.4
ATAACAAATCAGTTGCGCCG	Standard	YGR134W::chr00_8:dntag	879.2	787.8	942.4	1220	1057	1222.8	1182.4	807.2	641.8
ATAACATCTTCCAACCGGAG	Standard	YGR135W::chr7_5:dntag	702.8	1191.4	454.8	849.8	454.4	1098	593	979	328.2
ATAACATGATATACCGCCGC	Standard	YGR136W::chr7_5:dntag	1674.8	1615.2	1914.2	1982.2	1830.2	2019.6	1952.2	1659.4	1192.2
ATAACCACATCACAGGCTGG	Standard	YDL199C::chr4_3:dntag	382.8	302.8	726.6	560.6	459.6	794.6	716.2	661.4	255.2
ATAACCCAGTGACAACGCTG	Standard	YGR137W::chr7_5:dntag	1450.6	1222.4	1625.6	1386.4	1209	1830.6	1199.25	1637.4	1095
ATAACCCGATTACAACTGCG	Standard	YNL232W::chr14_2:dntag	59.2	66	70	71.8	64	69	74	73.8	54.2
ATAACCCTCAGTAACGACGG	Standard	YNL231C::chr14_2:dntag	1551.6	1639.4	2628.4	2458.8	2271.6	2423.2	2521	2022.8	1675
ATAACCGGATATAACTCGGC	Standard	YNL230C::chr14_2:dntag	655.25	408.8	424.6	400.6	519.6	446	740	594.2	614
ATAACCGTACTACAACCTGG	Standard	YNL229C::chr14_2:dntag	712.8	820.4	464	504.6	284	527.2	436.6	453.2	465.6
ATAACCTGATCGAACCCAGT	Standard	YLR125W::chr12_2:uptag	83	78	147.6	110.8	93.8	134.6	118	146.2	73.2
ATAACCTTAGATACACGCCG	Standard	YGR138C::chr7_5:dntag	1015	1226.2	1541.4	1561.2	1493.4	1656.8	1326.4	1356.8	850.4
ATAACGAAGAGCACCTCCGG	Standard	YNL173C::chr14_2:dntag	1896.6	2116.8	2721.4	2537.4	1992	2946.6	2423.8	2188.8	2140.8
ATAACGACACAGACCTCTTG	Standard	YNL172W::chr14_2:dntag	321	223.6	636.8	451.75	287.8	696	564.75	546.8	198
ATAACGCACCCACAAGGTTG	Standard	YGR139W::chr7_5:dntag	697.2	723.75	1068.2	1101.8	918	1405.6	851.2	1059.4	503.6
ATAACGCCACACACGAGTTG	Standard	YNL170W::chr14_2:dntag	345.6	251.4	689	494	323.4	744.2	666	606.2	213.6
ATAACGGAATAGACCGGGCT	Standard	YGR140W::chr7_5:dntag	61.4	57.2	68.75	60.6	65.4	74.4	69.2	65.6	47.8
ATAACGGGACAGAAGCTGCT	Standard	YGR141W::chr7_5:dntag	876.4	927	904.6	986.2	650.8	1068.4	963.4	1081.2	717.4
ATAACGTCAAGAGACTGGCC	Standard	YNL171C::chr14_2:dntag	121	301	174.2	453.4	124.6	685.6	250	470.2	63.6
ATAACTACAATACGCTGCCG	Standard	YGR142W::chr7_5:dntag	682	667.8	1468	1315.25	1260.4	1264.2	1403.4	1203.2	856.8
ATAACTATAACCCGTACCGG	Standard	YJR005W::chr00_13:uptag	1538.4	2108.75	2164	2297.6	2129.4	1944.4	2054.4	2083	1314.4
ATAACTTAACTACAGGGCCG	Standard	YJR006W::chr00_13:uptag	83.2	78.8	83.2	90.6	79.6	89.6	99.6	90.6	63.2
ATAACTTCAACCCGCGATAG	Standard	YJR007W::chr00_13:uptag	57	53.2	63.2	66.2	55.4	66	68.25	64.2	46.4
ATAAGATCAAGACCTGTGCC	Standard	YCR002C::chr3_1:uptag	58.8	57	67	61.8	58.8	71.8	71.8	73	51
ATAAGCACAAGCAGCGCGGT	Standard	YGR143W::chr7_5:dntag	478.2	450.8	872	712.6	559	1051.8	751.2	793.6	382
ATAAGCATAACCGATCCTCG	Standard	YJR008W::chr00_13:uptag	1466.8	1285.8	1649.8	1649.6	1658.6	2224.4	1394.2	1616.2	1043.8
ATAAGCGCAAGACAGGCGTC	Standard	YJR061W::chr00_13:uptag	326.8	314.2	679.8	586.2	566.2	627.2	435	495.6	246
ATAAGGACAACGGACGCCCT	Standard	YGR144W::chr7_5:dntag	1461	1504.6	1671	1650.4	1652.4	1896.6	1648.8	1629.4	911.6
ATAAGGTAACCCGCATGACC	Standard	YCR003W::chr3_1:uptag	56.4	58.2	83.6	75.4	67.2	92	80.25	69.4	50.8
ATAAGGTGAACGACATCTCC	Standard	YJR062C::chr00_13:uptag	396	353.75	571.4	578.4	623.8	615.6	562.2	413.6	178.6
ATAAGGTTAAGGAAGCGTCC	Standard	YCR004C::chr3_1:uptag	51.75	53.2	55.6	58.8	51.8	58.4	57.2	65.2	45.6
ATAAGTACAACGCAGTCGCC	Standard	YJR063W::chr00_13:uptag	168.25	124.8	291.8	193	134.6	345	228.75	276.2	109.2
ATAATACAAGAGTCGCGCCG	Standard	YJR064W::chr00_13:uptag	78	57.4	82.8	81.4	69.8	197.4	84.6	88	64.4
ATAATCAGAACGACGTGTCC	Standard	YJR025C::chr00_13:dntag	948.4	845.6	1550.6	1504.6	1327.6	1651.2	1031.75	1370.2	947.2
ATAATCATAACCTCGACGCG	Standard	YJR026W::chr00_13:dntag	712.8	834.6	1403.2	1353.2	1015.8	1500	1067.8	1196.2	1052.8
ATAATCCCAACCCTGATAGG	Standard	YGL131C::chr7_2:uptag	3210.2	3019	2734.2	2961.6	3044	3135	3010.2	2955.2	1834.8
ATAATCGTAACGCACCGACG	Standard	YDL227C::ctrl_50:dntag	4878.25	4487	3304.8	3471.6	3599.2	3325.6	3530	3697.2	2853.4
ATAATGAACGGAACGGCCCG	Standard	YDL200C::chr4_3:dntag	158.6	155	343.2	393.8	347.6	478	398.8	411.8	141.6
ATAATGTCAACGACGCTACC	Standard	YIL117C::chr9_2:uptag	73	69	78.8	84.8	75	87.2	86	87.6	57
ATAATTCCAACATGGGAGCC	Standard	YGR025W::chr7_3/chr00_12:dntag	231.6	181.2	392	267.2	252.6	303.8	291.2	282.2	189.8
ATAATTTAAGATGCCGGGCC	Standard	YGR026W::chr7_3:dntag	1279.6	1196.4	1426.25	1312	1383	1455.8	1460.4	1418.2	1004
ATAATTTCAACCTAGCCGG	Standard	YGL132W::chr7_2:uptag	186.4	110.8	376.25	237	144	404	337.5	323.6	106.4
ATACAAACAGTGAGGCCCTG	Standard	YOL150C::chr00_10:uptag	310	321.6	428.6	722	649	600.4	568.6	594.4	217.2
ATACAACATTCATGCACCGG	Standard	YGR146C::chr7_5:dntag	1412.4	1162.2	1264	1356.2	965.8	1378.4	1460.4	1270.6	970.6
ATACAACGTGATACACCCGT	Standard	YGR147C::chr7_5:dntag	65	62.4	67	58.4	63.8	66.8	66.6	75.2	48
ATACACTAACCTATCGACGG	Standard	YIL118W::chr9_2:uptag	60.3333	57.4	71.2	68.2	63.4	78.8	74	77.6	53
ATACAGAAGATACGCTCCCG	Standard	YIL119C::chr9_2:uptag	747.5	646.6	1598.2	1363.8	1370.6	1437	1305.6	1166	394.6
ATACAGCCACACACTATGGT	Standard	YIL173W::chr9_2:uptag	324	221.2	602.6	456.6	340.4	673.4	573.6	512.8	259.6
ATACATCGAACGACCTATCG	Standard	YIL132C::chr9_2:dntag	952.333	923	1251.6	1181	898.8	1639.4	1023.4	1236	1132.6
ATACCAACGCACAATCGGTG	Standard	YGR148C::chr7_5:dntag	218.4	271.6	346.2	296	288	432.4	282.6	287.8	250.6
ATACCACCACACAATGTTGG	Standard	YDL201W::chr4_3:dntag	557	537.75	813.6	755.4	714	1042.4	734.25	794.8	426
ATACCAGAAGCAACTCTCT	Standard	YIL133C::chr9_2:dntag	611.4	554	705	859.8	607.6	834	729.4	870.8	516
ATACCAGTAACGATAGCTCC	Standard	YIL134W::chr9_2:dntag	73	66	67.4	74.4	67	81	80.2	76	63.6
ATACCCAGAACGACTATGCG	Standard	YIL135C::chr9_2:dntag	705	641.4	642.2	666	371.2	788.2	645.6	588.6	556.8
ATACCCGCAACGAATAGGCG	Standard	YIR011C::chr9_2:dntag	69	76.4	96.6	85.6	74.6	111.2	105.75	114.4	56.8
ATACCGGGAACGAAGAGTCC	Standard	YIR012W::chr9_2:dntag	69	84	105.4	100.8	82.8	112	104.4	116.8	64.2
ATACCTACAACGACTTACGG	Standard	YIR013C::chr9_2:dntag	1119.75	1475	1148.6	1274.6	1460.4	1532.6	789.6	1032	786.4
ATACCTCTAACGAACTGACG	Standard	YIR014W::chr9_2:dntag	1572	1373.8	2221.4	2178.4	2274.8	2062.8	2090	1837.2	1191.2
ATACCTGAACGAGCAATCCG	Standard	YOR147W::chr15_2:uptag	74	69	75.4	78.4	73.4	75.8	87.4	74.2	57.6
ATACGACGAACGACGGTACG	Standard	YOR148C::chr15_2:uptag	86	68.8	83.4	77.8	75.6	94.4	100.8	91	63.8
ATACGATTAACGACTCGGAC	Standard	YOR149C::chr15_2:uptag	73	87.4	74.2	75.6	89.6	80	78	75.6	54.8
ATACGCACAACGAGTACGCG	Standard	YOR150W::chr15_2:uptag	89.6	84.6	118.6	106	101.6	190.2	133.8	109.4	66.4
ATACGCTAACGCACCTAGAG	Standard	YOR187W::chr15_2:uptag	109.667	88.8	148.4	116.2	91.6	178	120	143.8	74.4
ATACGCTGAACGACTGAGAC	Standard	YOR188W::chr15_2:uptag	1648.2	1843.4	2363	2823.6	2662.2	2774.6	2537.6	2157	864.6
ATACGGAACCTAAGAGCCCG	Standard	YOR189W::chr15_2:uptag	2100.8	2658.2	2480	1982.2	1795.6	2668.6	2323	2853.2	1140.4
ATACGGAGAACGAGGATCTT	Standard	YOR190W::chr15_2:uptag	2477.4	2383.8	3029.8	3157.6	3155.8	3335	3284.6	3117	1056.8
ATACGGGTAACGACACTACG	Standard	YEL008W::chr5_2:uptag	2033.2	2413.2	2107.6	3151.4	3000.6	2894	3221.6	3226	1496.6
ATACGTCGAACCATCTTACG	Standard	YEL009C::chr5_2:uptag	71.5	64.4	76.75	75.6	72.4	81.8	77.2	76.8	60.6
ATACGTGAACCAGGTGGAAC	Standard	YEL010W::chr5_2:uptag	131.2	119.8	160.5	198.4	161.8	201	209	201.6	97.4
ATACGTGCAACCACTGCTAA	Standard	YEL011W::chr00_8:uptag	451.4	363.6	873.333	640	645.4	868.2	737.667	780	393.4
ATACGTTTAAGCACGCACAC	Standard	YEL047C::chr5_2:uptag	964.5	900	1468.8	1206.6	937.6	1589.4	1381.8	1393.8	633.2
ATACTAATAACTCACGCCGG	Standard	YEL048C::chr5_2:uptag	525.4	584.8	931	771.6	821.2	965.2	887.2	880.2	362.8
ATACTACCAACGAGTCACGG	Standard	YEL049W::chr5_2:uptag	1130.75	1181.8	1992.2	2165.8	1959	1879	2206.2	2386	849.4
ATACTCACAACGCGATACGG	Standard	YEL050C::chr5_2:uptag	81.75	64.4	90	94.4	72.4	112.8	91.2	95.8	53.6
ATACTCCAACCCTGGGATAA	Standard	YGR149W::chr7_5:dntag	2498	2203.5	2644.4	2637.2	2389.6	3023.8	3224.2	2751.2	2182.8
ATACTCGAACCAGTTTCACG	Standard	YER007C-A::chr5_2:uptag	1580.6	1733	1539.6	1807.2	2038.2	2547.4	2270	2108.8	1328.4
ATACTGCAACCATTTAGCCG	Standard	YGR150C::chr7_5:dntag	112.6	87.4	168.6	113.4	77.8	199.4	168.2	177.4	80.8
ATACTGGAACCGATCTACAC	Standard	YER007W::chr5_2:uptag	2191	2220	2292.4	2191.6	2750.4	2798.8	2679.6	2952	1761
ATACTGTCAACGAGACCACG	Standard	YER008C::chr5_2:uptag	74	57.4	75.4	79.6	63.6	81	78.8	78.2	52.4
ATACTTGCACCCAACGATGA	Standard	YNL064C::chr14_3:uptag	197.6	242.2	359.2	451.2	376.8	406.4	356.4	575.2	113.8
ATAGAACTCAATAGCCGCTC	Standard	YGR151C::chr7_5:dntag	238.4	197.8	646.8	599	488	775.4	600.8	670.4	206.8
ATAGAATAAGAGCTGCGCCG	Standard	YER009W::chr5_2:uptag	74.6	61	77.2	77	67.6	81	88.6	86	61.8
ATAGACGCAACGACTGCACG	Standard	YER056C-A::chr5_3:uptag	1335.2	1483.4	1280.6	2044.4	1801.8	1896.2	2158.8	2044.8	1088.2
ATAGACTTAACGCACGATCC	Standard	YER057C::chr5_3:uptag	2505.6	2706.2	2946.6	2827.8	2672.2	2995.4	3356.8	3573	1645.8
ATAGAGAACTCACACCCGTG	Standard	YGR152C::chr7_5:dntag	2448.5	2493	3084	2705.6	2689.8	3218.2	2724.6	2746.6	1909.2
ATAGAGCGAACGATAGTTGC	Standard	YER058W::chr5_3:uptag	64.8	60.2	65.8	70.6	73.8	73.4	74.75	65.6	55.2
ATAGAGTCAACGAGCGTACC	Standard	YER059W::chr5_3:uptag	294	323.8	569.4	572.2	417.4	498	686.2	605.6	296.2
ATAGATATAACTGACGCGCC	Standard	YER106W::chr00_5:uptag	2592.75	2352.2	2674	2909	3010.2	3157.8	3303.4	2949.2	1885.8
ATAGATTAACTACACCCGGC	Standard	YGR153W::chr7_5:dntag	1315	1422.6	2414	2139.8	1670.8	2218.2	2152.33	2403	1640
ATAGATTGAACGAGCTGACC	Standard	YER107C::chr00_5:uptag	192.4	158.8	162.2	201.2	157.2	157.4	189.4	183.8	171
ATAGCAACGCCAACTACGTG	Standard	YGR154C::chr7_5:dntag	740.25	851.8	1387.6	1643.2	1570	1713.2	1315	1609.6	680
ATAGCACAACGTAGACGCCG	Standard	YER108C::chr00_5:uptag	1515	1789.75	2194.6	2235.8	2167.2	2178.6	2342.2	2445.6	1380
ATAGCAGTAACGCATAGTCC	Standard	YER109C::chr00_5:uptag	1230	915.4	1331.2	1342.4	1221	1631.6	1334.5	1583.8	731.2
ATAGCCATAACGATTACGGC	Standard	YER164W::chr00_5:uptag	753.4	957.6	652.8	1441.75	579.2	1480.4	1570	1852	827.6
ATAGCCCAACGCAAGAGCTG	Standard	YGR155W::chr7_5:dntag	307.8	185.8	596.6	437.4	282.8	680.2	567.5	512.8	187.8
ATAGCCTAACGACGAGACGG	Standard	YER165W::chr00_5:uptag	116.25	101	154.8	135.4	109.6	185	153	156.4	83.6
ATAGCGACAACGATCTACCG	Standard	YER166W::chr00_5:uptag	2882.6	2861.2	3308.4	3935.6	3151.4	4234.2	3481.4	3571.6	1776.2
ATAGCGCGAACGAGGACACT	Standard	YER167W::chr00_5:uptag	1865.6	1755.4	1905.4	1287.4	1524.2	1907.8	1988.4	2065.6	983
ATAGCTCAATCAACGATGCG	Standard	YGR156W::chr7_5:dntag	59	51.25	68.8	61.8	57.2	71.2	70	70	47.2
ATAGCTCCAACCGCGTAGAA	Standard	YML104C::chr00_9:uptag	2027.4	1992.6	2972.2	2850.8	2637.8	3504.8	3061	2655.6	1340
ATAGCTGTAACCCTTAGACC	Standard	YML103C::chr00_9:uptag	959.2	2153.4	1242.2	2332.4	1280.4	2591	1275.2	1915.8	606.8
ATAGGAAGAAGGACTCGTCT	Standard	YML102W::chr00_9:uptag	1469.4	1531.5	2581	2487.4	1888.6	2866.6	2381.8	2247.4	915.8
ATAGGACAACTACACTTCCG	Standard	YML102C-A::chr00_9:uptag	64.2	66.2	91.6	101.2	93	115.6	83	83	56.4
ATAGGCCCAACGCCAAGAGT	Standard	YDR162C::chr4_5:dntag	389.25	316	660.25	524.4	326.2	802.4	601	623	217
ATAGGGCAACGCACCGTAAC	Standard	YML043C::chr13_1b:uptag	69	63.2	77	65.4	67	102	86.4	83.4	56.4
ATAGGTATAACGCAGTACGC	Standard	YLR361C::chr00_11:uptag	3948	3501	5325.6	3921.2	4299.2	5266.8	4228.4	4325.6	2500.6
ATAGGTCGAACGAGAGACTC	Standard	YMR013C::chr13_2:uptag	63.5	60.4	77.6	69.2	66.6	74.2	76.2	71.8	53.2
ATAGGTTACAGGCGTATTC	Standard	YFR031C-A::chr6_1:dntag	136.8	137.5	253.75	269.6	193.8	286.8	239.6	299	184.2
ATAGGTTCAACTAACGTGCC	Standard	YMR014W::chr13_2:uptag	49.6	48.2	58.25	56	50	57.6	56.75	57	42.8
ATAGTAACCTCAATACGCGC	Standard	YMR015C::chr13_2:uptag	1723.5	2228.6	2758.6	3599	3744	3799.8	2985.4	3310.8	2171
ATAGTAAGACACCAGCCGCG	Standard	YMR016C::chr13_2:uptag	341.8	222.4	674.333	472.4	313.6	777.2	630.75	569.4	205.4
ATAGTACGAACGATCCGTCA	Standard	YER123W::chr00_5:dntag	337.6	280.6	558.8	472.4	367	654	878	852.8	344.2
ATAGTCAACCGAGTCACACG	Standard	YER124C::chr00_5:dntag	533.75	486.4	945.25	1115.4	816.8	831.6	948.2	931.6	755.2
ATAGTCAGAACGATTGAGCC	Standard	YER125W::chr00_5:dntag	75.8	77	87.4	83.8	78	91.8	95.4	82.2	61.4
ATAGTCGTAACGCGAATACC	Standard	YER126C::chr00_5:dntag	54.8	57.8	67.6	63.4	60.2	73.2	68.8	66.2	50.4
ATAGTGACAACTCAGCACCG	Standard	YMR133W::chr00_9:uptag	578	636.2	1338.8	1323	1100	1535.8	1097.2	1212	575.2
ATAGTGCAACCCGCGCAGAA	Standard	YGR157W::chr7_5:dntag	230	214.6	396	312.8	214.6	527.8	321.75	408.6	157.6
ATAGTGTAACGAGGCTGAAC	Standard	YMR134W::chr00_9:uptag	71	64.75	73.2	68.4	62.4	75.4	77.4	73.2	53
ATAGTTCAACCGCGACTCAA	Standard	YGR158C::chr7_5:dntag	68.8	71.5	78.2	90.6	75	95.6	93.4	83.2	60.4
ATAGTTCCAACGAGCTTTCC	Standard	YCR005C::chr3_1:uptag	1059	1129.2	1848	1807.2	1641.2	1756.4	1756.6	1869.6	869.4
ATAGTTCGACCCACAAGCAG	Standard	YML031W::chr00_12:uptag	316.5	211.4	653.8	457	310.8	728.2	614.8	562.4	189.4
ATAGTTGAACCATTCGTCCC	Standard	YCR006C::chr3_1:uptag	1159.8	1140.8	2172.4	1977.4	1744.4	2682.2	2182	2533.8	860.8
ATATAAATCGCATACCGCGC	Standard	YMR135C::chr00_9:uptag	782.8	879.8	907	1626.4	1368.4	1440.2	1018.25	1188.2	841.4
ATATAACGGTACCACCCGTG	Standard	YMR191W::chr13_4:uptag	64.4	62.6	63.25	65.2	60.8	78.6	82.25	65.2	53.4
ATATAATCAAGACTGGCGCG	Standard	YGR159C::chr7_5:dntag	65	62.2	64.8	64	78.8	75	67	71.6	53.2
ATATAATTCACGACACCGCG	Standard	YMR192W::chr13_4:uptag	539.25	509.8	770	1152.4	1027.2	952.4	895.2	661.6	403.6
ATATACACAAGGACCTCGCG	Standard	YMR193W::chr13_4:uptag	78.4	72.4	126	104.2	91.6	135.8	127	114.2	63.8
ATATACGTCACCACAAGCGG	Standard	YMR194W::chr13_4:uptag	383.2	280.2	794	628.6	444.8	920.6	692.6	714.6	275.2
ATATAGAACGGAAGCGCCGC	Standard	YMR161W::chr13_4:dntag	921	898.8	1883.2	1973.8	1993.4	1563.8	1588.8	1393.8	1061.6
ATATAGAGAAGAGGCTCGCC	Standard	YMR162C::chr13_4:dntag	2317	2331.2	2723.2	2961.6	2803.6	2990.8	2633.6	2784	1684.4
ATATAGTCAACGATGGGACC	Standard	YMR163C::chr13_4:dntag	746.2	655.6	1089.6	945.2	842	921.2	825	897	576.6
ATATCAACCGCACGGAACGG	Standard	YMR164C::chr13_4:dntag	725	896.8	1422	1492.4	1512.8	1674	1160.2	1017.4	751.6
ATATCAATAACTGCGACGCC	Standard	YMR222C::chr13_4:dntag	201	202.2	251.2	274.2	297.8	210.2	182.2	225.4	192.6
ATATCCACAACGCCTAAGGG	Standard	YDL202W::chr4_3:dntag	344.5	209.8	692.6	470.4	292.4	731.2	609	569.2	197
ATATCCTAACGACTTCTCGG	Standard	YMR223W::chr13_4:dntag	851.75	1161.2	1408.8	1415.8	947.4	1741.6	991.4	1636	957
ATATCGAGAACCCTCACTAG	Standard	YMR224C::chr13_4:dntag	201.4	386.2	157	229.8	106.2	408	286.4	498	127.2
ATATCGCGCAATCAACGCTA	Standard	YMR225C::chr13_4:dntag	3555.2	3313	5254.8	5170.6	4900.6	6141.2	5734	5572.4	4000
ATATCGGAACGCACGCTAAC	Standard	YLR153C::chr00_12:uptag	88.5	87.8	107.4	102.6	96.8	124.8	115.8	114.2	76.4
ATATCGTAACGGAAGACGCG	Standard	YAL015C::chr1_1:uptag	3002	3077	4550.2	4160	4034	4874.4	5069.8	4746.6	2581
ATATCGTGAACCATTGGAC	Standard	YGR160W::chr7_5:dntag	50.25	51	57.8	64.8	56.2	64.4	61.2	63	46.8
ATATCGTTAAGCCATACGCC	Standard	YAL014C::chr1_1:uptag	943.2	698	1259.2	1555.6	1478.4	1666.2	1284.8	1318.2	740.4
ATATCTCTAACGCGCATAG	Standard	YAL013W::chr1_1:uptag	281.333	612	219.4	701.2	196.2	1123.8	329.8	1106.6	120.6
ATATCTGAACCGACTATCCG	Standard	YER034W::chr5_3:dntag	1182.4	1238	2036.4	1963.8	1442.4	2153.2	1767.8	2212.4	1682.4
ATATCTTTAACGTCGAGCGC	Standard	YER035W::chr5_3:dntag	537.2	486.4	754.8	677.6	486	690	591	790	423.8
ATATGAATAACTCCAGCGCC	Standard	YCR007C::chr3_1:uptag	260.4	232.6	574.8	378.6	238.4	623.8	473	537.8	168
ATATGAGTAACCGCGAGCAC	Standard	YER036C::chr5_3:dntag	101	93.2	108.8	104.4	89.4	113.2	124.8	105.8	74.4
ATATGATCCAATCCAACGCG	Standard	YGR161C::chr7_5:dntag	1444	1320.2	2089.4	1791.4	1745.2	1928	1706.2	1945.6	1341.8
ATATGATGAACGCGAAGGCC	Standard	YCR008W::chr3_1:uptag	1927.5	1496.75	2178	2821.8	2035.4	2909.2	2251.5	3032	1118.2
ATATGCACAACGCGCAATCG	Standard	YER037W::chr5_3:dntag	92.2	76	110.25	80.8	77.4	111	108.6	96.4	59.4
ATATGCTAACGACCAGTAC	Standard	YIL116W::chr9_2:uptag	175.6	117.8	294	196.2	127.6	360	235.4	251.4	111
ATATGGAACCGCATGTAACC	Standard	YGR162W::chr00_17a:dntag	102	89.8	132.5	121.6	113.6	131.6	118.5	123.4	98.2
ATATGGACAACCCTCTACAG	Standard	YER088C::chr00_8:dntag	422	380.4	651	595.2	556.6	665.4	535.4	565	290.2
ATATGGCCCAATAAGAGGTC	Standard	YGR163W::chr7_5:dntag	3217.25	2557.2	3286.75	2904	2582.2	2912	2968.5	2663.2	2552
ATATGTACCAAGGAAGCGGC	Standard	YCR009C::chr3_1:uptag	3792.75	4299.4	4252	4087.8	3572.8	4921	3872	4415	2508.8
ATATGTATAACGCCTACCCG	Standard	YER089C::chr00_17a:dntag	1861.8	1975.8	2229	2133.8	2020.4	2310.4	2631.2	2547	1681.8
ATATGTCAACGCACACAGCG	Standard	YER090W::chr00_8:dntag	269.25	174	589.2	396.6	283.6	616.2	553	514.2	157.8
ATATTAACCTATCTCCGGCG	Standard	YGR164W::chr7_5:dntag	350.8	528	606	611.4	450.2	591.6	445.8	441.2	439.6
ATATTAAGAAGTAGGCGGCC	Standard	YCR010C::chr3_1:uptag	3110	2910.25	3782	3877.8	3245.8	3971.8	4077.4	3528	2169
ATATTCAACATTGCCACCGG	Standard	YGR165W::chr7_5:dntag	236	154.8	470	338.2	191.8	554	444	465.2	145.4
ATATTCCAACAGTTCTGCCG	Standard	YDL203C::chr4_3:dntag	1068	1275.4	1130.25	1215.8	1024	1557.8	1404.2	1706.8	525.4
ATATTCGACAGTAACGCCGA	Standard	YGR166W::chr7_5:dntag	565	752	1010.2	1165.4	804.8	1467.4	845	982.4	465.8
ATATTCGCAACCTACGTCGA	Standard	YER091C::chr00_8:dntag	111.667	106.75	130.8	129.6	130.2	132.6	143	133.8	120.8
ATATTGAACCTCCACACAGG	Standard	YGR167W::chr7_5:dntag	301	180.4	550.75	386.2	244.6	610.6	527.75	487.6	157.6
ATATTGCCAACCCGCTGAGA	Standard	YLR190W::chr12_3:uptag	306.8	187.2	522.5	373.8	243	656.2	485.8	477.4	170
ATATTGGTAACCGGACGCAA	Standard	YNL063W::chr14_3:uptag	3213.2	2582.6	3187.75	3216	3397	3047	2856.6	2604.6	1970.4
ATATTTCTAACGCCAGTCCG	Standard	YHR001W-A::chr8_1:uptag	329.2	225.6	618.8	432.4	291.8	692.8	530.8	509.4	217.6
ATATTTGGAACGCAGCTCAC	Standard	YCR011C::chr3_1:uptag	252.6	226.6	453.4	342	278.6	523.4	416.5	464.8	183.8
ATCAAAGGTTGGGACAAGCC	Standard	YGR168C::chr7_5:dntag	1212.6	818	1361.2	1686.6	1647	1379.5	1299.2	1564	1157.8
ATCAAAGTTTCGAGAACCGC	Standard	YGR169C::chr7_5:dntag	1824.4	1879.8	2803.2	2718.4	2603.2	2902.4	2319.4	2496.2	2022.6
ATCAAATCAATTACGCCGCG	Standard	YDL204W::chr4_3:dntag	1685.8	1553	2188.25	2158.4	2084	2055.2	2049	2214.2	1297
ATCAACAGGTTTCAAGACCG	Standard	YDL205C::chr4_3:dntag	72.4	71.2	77.4	81.2	77	96	87.4	80.2	60
ATCAACCCGTTAGAACAGGC	Standard	YGR170W::chr7_5:dntag	826	867.8	1493.4	1320.6	1291	1588.2	1265.75	1273.4	712.2
ATCAACCGATGCGAACCTAG	Standard	YGR171C::chr7_5:dntag	73.8	68.2	78.2	75.2	78.4	91.6	85.25	83.8	58
ATCAACGGACAATACCTGCT	Standard	YLR030W::chr00_8:dntag	2554.4	2500.75	2921.8	2774.4	3064.4	3075.8	2939.4	2893.8	2013.4
ATCAACTGAACCTCATACGG	Standard	YHR003C::chr00_10:uptag	2267.8	2527	2569.2	3035.8	3292	3095	2982.75	3166	1576.4
ATCAAGGAAGCCACACCTGT	Standard	YDR163W::chr4_5:dntag	547.2	606.2	941.6	840.4	679	1257.2	775.8	867.8	397.8
ATCAAGGCAACCGCCAGGAG	Standard	YGR172C::chr7_5:dntag	338.6	196.2	594.75	424.6	271.4	689	545	531.6	190
ATCAAGTCAACCTACTACGG	Standard	YHR004C::chr00_10:uptag	363.6	515.2	614	566	613.4	509.2	295.75	459	261.4
ATCACATTAACGGAAGGCCC	Standard	YDR507C::chr4_8:dntag	69.8	64.8	80.25	79.8	66.2	85	93.4	83.8	53.6
ATCACCACACAGAAGTCGGG	Standard	YGR173W::chr7_5:dntag	445.2	377.6	856.8	706.6	540.4	1040.8	749.25	741	334.4
ATCACCGAACCGCAGTTAAG	Standard	YHL031C::chr8_1:dntag	405.8	709.4	625.2	768.4	663.6	947.6	529	682	218.2
ATCACGGGAACCGAGGTACA	Standard	YHL030W::chr8_1:dntag	1066.8	1204.6	1757.2	1310	1338.4	1509.4	1984.8	1826.4	1222.4
ATCACTGTAACCTACGTTCG	Standard	YHL029C::chr8_1:dntag	862.333	996	1129	1722.8	1100.6	1576.2	1424.2	1097.2	797.2
ATCACTTCAACCTAGACAGG	Standard	YHR030C::chr8_1:dntag	138.8	628.8	171.4	1138	279.6	1197.6	275	1126.8	134.2
ATCAGAAGAACTGCACGTCC	Standard	YHR031C::chr8_1:dntag	307	318.2	259.2	326	273.2	333.4	268.6	273.4	245.4
ATCAGATCAACCCCACTAGG	Standard	YHR032W::chr00_8:dntag	1532	1774.4	2152	1747.2	1643.8	1843.8	1954.2	1715.2	1186.2
ATCAGCATAACCTCTAGCGA	Standard	YHR033W::chr8_1:dntag	373.6	377.2	583.4	529.8	307.6	534.6	386.5	460	384.2
ATCAGCGCAACCGATATACG	Standard	YPL240C::chr16_1:uptag	1204.2	1120.8	1325.2	1714.2	1651.6	1602.4	1392.2	1438.6	694.2
ATCAGGTCAACTAATCACCG	Standard	YPL239W::chr16_1:uptag	237.4	205.8	284.2	189	97.4	283.8	200.8	247	123.4
ATCAGGTGACACACAATCCT	Standard	YGR174C::chr7_5:dntag	79.6	69.8	104.8	105	89.6	108.8	97.6	101.2	72.4
ATCAGTACAACGGACATGCC	Standard	YPL237W::chr16_1:uptag	86.6	84	120.8	113.8	85.6	142.6	115.8	117.8	67.8
ATCAGTATAACTACGAGGCC	Standard	YPL238C::chr16_1:uptag	78.5	74.8	91	89.4	85.8	94.4	84.8	89.2	63.4
ATCAGTCCAACCTACAGATG	Standard	YDL227C::ctrl_18:uptag	794.8	647.8	533.4	591.6	600.6	610.6	571.4	622.6	472.8
ATCATACAACTTCAGACCGG	Standard	YGR176W::chr7_5:dntag	1558	1767	2481.2	1860.2	2032.4	2490.2	1725.8	1782	1524.6
ATCATACGTAATAGGGCGG	Standard	YGR175C::chr7_5:dntag	64.2	58.6	77.6	79.2	62.2	80.6	73.4	74.6	53
ATCATACTAACGGATCGACC	Standard	YPL274W::chr16_1:dntag	1344.25	1345.4	2645.4	1894	1854.8	2098.8	2542.4	2463.6	1499.2
ATCATAGGAACGTATAGTCC	Standard	YPL218W::chr16_1:dntag	59.4	55.4	59.6	61	58.6	64.6	67.2	60.8	50.8
ATCATCATAACTACGCACGG	Standard	YDL227C::ctrl_48:dntag	6404	6162	4399.6	4515.8	4497.4	4446.8	4532.4	4972.4	2914
ATCATGTGAACCTATTGGCC	Standard	YDR508C::chr4_8:dntag	205.75	169.4	143.4	130.8	116.6	162.2	162.8	197.4	176.4
ATCATTATACATCACGCCGG	Standard	YPL216W::chr16_1:dntag	275.5	185.2	505.8	349.6	225.4	582.6	447	452	194.6
ATCATTCAACCTCCATGTGG	Standard	YGL135W::chr7_2:uptag	48.8	45.4	54.2	52	45.5	57.4	57.8	59	43.6
ATCATTGTAATCGCGTGACA	Standard	YPL215W::chr16_1:dntag	51.8	48.2	55	49.8	50.8	55.4	55.6	60.6	43.8
ATCATTTCAACGCAGTGACC	Standard	YCR012W::chr3_1:uptag	77.2	66.8	89	79.2	66.4	96.4	108.4	89.2	58.2
ATCCAACCGGGAGGAACCTA	Standard	YLR191W::chr12_3:uptag	536.2	610.8	817.6	674	282.8	1003	887.25	1273	429.4
ATCCAACGCCATCTAAGAGG	Standard	YDL206W::chr4_3:dntag	276.2	167.4	555.6	359.2	235.6	615.4	476.6	467.4	163.6
ATCCACAACTAATCGACGGT	Standard	YNL311C::chr14_1:uptag	1343.6	1352.4	2400.4	2714.2	2646	2672.2	1683.6	1653.4	954.4
ATCCACGAACCTCGGAGAAG	Standard	YNL310C::chr14_1:uptag	75.6	70.2	78.2	72.2	68.4	90	90.6	89.6	62.2
ATCCACGGAACGCAGTCAGA	Standard	YNL309W::chr14_1:uptag	391	263	705.8	566.2	386.4	837.6	625.6	627.6	283.6
ATCCACGTAACCCTGTATAG	Standard	YNL308C::chr14_1:uptag	78.6	70	84.4	80.4	75	84	87.2	78	61.2
ATCCAGAGAACGTGAGATCC	Standard	YNL251C::chr14_1:uptag	115.4	83.8	195.2	139.6	105	234.6	175.2	158.8	93
ATCCAGCTAACCCTATTTGG	Standard	YGL136C::chr7_2:uptag	286	139.2	86.2	294.4	194.8	127.4	70.6	89	104.6
ATCCAGGGAACCTTACTACA	Standard	YNL062C::chr14_3:uptag	61	67.2	64.2	63.6	66.6	67	66	72.6	48.4
ATCCAGTAACCCTTCAGAGA	Standard	YGR177C::chr7_5:dntag	2026.5	1896.8	2335	2022.6	2152.6	2204.4	1789	1966.6	1299.4
ATCCATACAGAAGGAGCGCG	Standard	YNL250W::chr00_8:uptag	171	118.6	271	192.6	145.8	293.4	265	226.6	101
ATCCATGAACATTGCGACAG	Standard	YDL207W::chr4_3:dntag	102.4	75.2	165.2	130.6	74.4	241.25	191.4	174.2	74.4
ATCCCAACCTAATCAGAGTG	Standard	YDL208W::chr4_3:dntag	81.8	68.75	149	100	76.4	164.8	179.8	149	68.8
ATCCCACGAACGATGAATCT	Standard	YLR031W::chr00_8:dntag	1660.6	1450	1742.6	1930.6	1479.8	1742.8	2295.6	2122.6	1126.6
ATCCCATAACATTTAGCGCG	Standard	YDL209C::chr4_3:dntag	52.2	49.6	54.2	58	51.8	58.4	56.4	53.6	42.8
ATCCCATCAACCTGGAATAG	Standard	YGL137W::chr7_2:uptag	57.2	53.6	55	49.4	49	57.2	54.4	63.4	42.4
ATCCCGAACGATCTCTAAGA	Standard	YNL249C::chr14_1:uptag	3073.6	2528.6	2970.4	3140.4	3049.4	3622.6	3946.4	3291.8	1654
ATCCCGACAACCGTGAATAG	Standard	YNL248C::chr14_1:uptag	66.2	61.2	66	73	66.8	73.4	78.6	69.2	53.4
ATCCCGGTAACCATCGTAGA	Standard	YNL295W::chr14_1:dntag	1231.2	1150.8	1122.4	994.8	984.8	1311.4	940.2	1133	1204.2
ATCCCTACACAACTGGGTAT	Standard	YLR032W::chr00_8:dntag	1403.4	1466.4	1366	1559	1304.8	1781.2	1491.8	1828.4	1043.4
ATCCCTATACCCGGGTTGAG	Standard	YJR113C::chr00_12:uptag	57.4	52.6	55.8	55	54.6	69.4	62.2	56.8	46.6
ATCCCTTGAACCCTGTGAGA	Standard	YKL030W::chr00_12:uptag	3829.4	3342.4	3279.67	3131.4	2884.2	3509.4	3594.8	3576.8	2105
ATCCGACAACCTGCTAGAAG	Standard	YOR127W::chr15_2:dntag	1497	1677.2	1772.8	2130.6	1616.4	1849.4	1621.4	2090.2	1400.2
ATCCGACGAACCGTTACGAA	Standard	YNL294C::chr14_1:dntag	985.5	1698.2	1089.8	2047	958	2287.2	752	1694.8	485.2
ATCCGCCCAACGGGAAGATA	Standard	YLR193C::chr12_3:uptag	1165	1023.8	978.4	1369.6	899	1423	1022.8	1243.8	796.8
ATCCGCGAACATTTAATCCG	Standard	YDL210W::chr4_3:dntag	3604.8	3402.4	3266.2	3536.2	2867.4	3568.8	4046.8	3844.4	2309
ATCCGGCCAACCGTTATAGA	Standard	YNL057W::chr14_3:uptag	1886.4	1671.2	2326.4	2261.4	1623.4	2478.4	2209.8	2642.8	1391.8
ATCCGGGTAACCGCTCGATA	Standard	YNL293W::chr14_1:dntag	2244	1749.2	2743.6	3060.2	3030.6	2727	2098.25	2818.4	2278.6
ATCCGGTTAAGATGTAAGCC	Standard	YCR013C::chr3_1:uptag	70.5	84.2	76.5	77.6	76.6	90.2	88	87.4	56.8
ATCCGTTCACAAGACCAGAG	Standard	YOR128C::chr15_2:dntag	423.6	387	809.8	599.6	427.4	903.6	639.6	741.2	332.8
ATCCTAAGAACGTATCACGC	Standard	YNL292W::chr14_1:dntag	1734.5	1715	2185.2	940.2	1074	2153.6	2009.6	2026.2	1658.4
ATCCTAGTAACCGCTGCATA	Standard	YNL247W::chr14_1:dntag	75.75	72	81.5	83.4	73.8	99.6	102	79.4	56.6
ATCCTCAACGATTCAGAACG	Standard	YGR178C::chr7_5:dntag	2380.2	2510.8	3650.2	3736.8	3426.4	4016.6	3777	3961	2718.8
ATCCTCGAACATGGCGTAAC	Standard	YNL246W::chr14_1:dntag	1452.25	1281.8	821.4	2662	1578.4	2438.4	1332.2	2211.8	799
ATCCTCGCAACCGTTTAGAA	Standard	YNL058C::chr14_3:uptag	1397.2	1345.6	2359.6	2220.2	1989.6	2329.2	2122.6	2059.2	1303.4
ATCCTGAACGCAGAGACACG	Standard	YNL245C::chr14_1:dntag	166.4	111.8	263.6	189	153.2	325.6	279.6	249.6	97.4
ATCCTGCGAACCGCTGATAA	Standard	YNL056W::chr00_16b:uptag	60.6	63.8	66.6	96	84.6	87.6	103.25	103.6	52.4
ATCCTTCGACATCGCAAGAA	Standard	YGR179C::chr7_5:dntag	88.4	70.6	117.6	78	70.2	133.2	134.8	97.6	68.8
ATCCTTGCACATGAACGTAC	Standard	YNL244C::chr00_8:dntag	73.2	71	78	77.2	69.8	85.6	84.25	79.4	57.8
ATCGAAATACACATCCGTGC	Standard	YGR181W::chr7_5:dntag	1384.2	1286.6	1558.75	1545.8	1603.8	1679.4	1621.75	1777.8	1046.2
ATCGAAATTAATAGGCCGTC	Standard	YGR180C::chr7_5:dntag	81.6	65.4	72.6	75.4	71	86.2	81.4	76.8	58.8
ATCGAACCGCACTCAAGAGG	Standard	YGR182C::chr7_5:dntag	2019.4	2218.4	2697	2960.8	3258.2	3364.8	2515.25	2471.2	2027
ATCGAACGCAAGTACACCTG	Standard	YGR183C::chr7_5:dntag	3617	3307.2	5060.2	4506.4	4195	5113.6	5150.2	4630.6	3153.4
ATCGAACTAACGTACATGCC	Standard	YMR274C::chr13_5:uptag	3312.75	2732.2	4861.8	4994.8	4493.4	4609.6	4766	4336	2614.2
ATCGAAGAACTAGAGCTGCC	Standard	YGR184C::chr7_5:dntag	867.4	857.2	762.75	916.2	852	1051.6	757.25	810	545.2
ATCGAAGGAACGCTAAGTTC	Standard	YMR275C::chr13_5:uptag	2111.8	2219.6	2277.8	3039.6	2141.8	3188	1895.5	2561.4	1103
ATCGACACAACTGTAGACCG	Standard	YMR276W::chr13_5:uptag	2786.4	2491.25	3489.6	3784.8	3506.6	3910.6	3572	3681.4	2130.4
ATCGACCCAAGAATAGCTCG	Standard	YOR129C::chr15_2:dntag	1986.2	1859.6	2482.6	2614.2	2545.6	2895.2	2257.6	2309.4	1621
ATCGACCTAACCGTCTAGTA	Standard	YMR277W::chr13_5:uptag	70.6	69.6	68.8	74.8	64.4	86.2	69.8	80.6	57.2
ATCGACGGAACCTTATGACA	Standard	YMR316C-A::chr00_8:uptag	268	245.2	666	558.8	431.4	655.6	528.2	734.8	147.4
ATCGAGGCACAACTACATTC	Standard	YGR185C::chr7_5:dntag	87.2	77.25	102.6	99.8	79.4	140.4	118.5	96.2	67.6
ATCGAGGTAACGCCATATAC	Standard	YMR317W::chr00_8:uptag	2374.8	2325.6	3031.6	3288	3247.6	2925.2	2481.2	2780.2	1191.2
ATCGAGTCAACCGGCCTAGA	Standard	YMR316C-B::chr00_8:uptag	1218	1145	1828	1957.6	1824	1957.4	1922.75	1707.2	890.6
ATCGCACGAACCTGTAATAC	Standard	YMR318C::chr00_8:uptag	3498.2	3668.4	3796.8	3795.2	3234	3711.8	3086.4	3803.6	1983.6
ATCGCAGAACCTCGACTAAG	Standard	YMR272C::chr13_5:dntag	127.4	128.2	297.2	291.2	218.8	301.8	257.4	307.2	112.2
ATCGCCGTAACCGCTTTAGA	Standard	YMR273C::chr13_5:dntag	3862.6	3326.6	4972.4	4894.8	4590.2	4794.6	4386.4	4040.4	3323.8
ATCGCCTAACCTAGATACAG	Standard	YMR274C::chr13_5:dntag	2740.8	2351.8	3747.6	3760.8	3460.2	3511	3456.2	3266.8	2063
ATCGCGCACCAACGGGATTA	Standard	YGR186W::chr7_5:dntag	90.2	77.2	115	100	84	156.2	138.4	127	61.6
ATCGCGTTAAGAGTGAAGAC	Standard	YMR275C::chr13_5:dntag	1976	2229.6	2188	2792.6	1994.6	2700	1651	2270.4	1689.2
ATCGCTCAACATTTATGCCG	Standard	YDL211C::chr4_3:dntag	70.6	68.6	76.6	75	72.2	79.4	80.6	94.2	60.2
ATCGCTCTAACCGTCGGAGA	Standard	YMR315W::chr00_8:dntag	2448.5	2798.4	2741.8	3615.6	2901	3182.2	2571.2	3614	2902.6
ATCGCTGGAACCGGGCTTAA	Standard	YLR194C::chr12_3:uptag	2502	2198.2	2286.75	3076	3360	2392.6	3328.2	3306.2	1478.8
ATCGGAACCTACTTACAAGC	Standard	YMR316W::chr00_8:dntag	1817.8	1681.6	2627	2249.6	1898.2	3127.8	2698	2669.2	2260
ATCGGAAGAATCTGAATCC	Standard	YCR014C::chr3_1:uptag	105	134	298.75	349.4	241.6	392.4	417.2	476.6	100.4
ATCGGAATAACGGTGAAGCC	Standard	YCR015C::chr3_1:uptag	126.8	115.2	177	148.4	137.8	171.8	180.6	147.8	96
ATCGGCAGACAAGCGGATAC	Standard	YGR187C::chr7_5:dntag	1267.6	1290.6	1701.25	1657.2	1644.6	1771.2	1518.2	1521.2	1163.6
ATCGGCGGAACCGGATCATA	Standard	YNL054W::chr14_3:uptag	150	135.4	210.5	285.6	266.6	294	270.25	296.4	118.4
ATCGGGCAACCGCTCTAGTA	Standard	YOL151W::chr00_17b/chr00_18:uptag	2684	2276.4	2706.4	2958.6	3110.4	3080.2	2431.5	3331.8	1821
ATCGGGGCGCCAGCCAATA	Standard	YLR195C::chr12_3:uptag	289.5	184	514.5	356.4	275	597.2	476.75	489.8	159.8
ATCGGGTAACCTCCCAGAAA	Standard	YLR196W::chr12_3:uptag	115.2	83.4	212.75	147.2	87	266.8	178.75	197	75
ATCGGTAACGAGGTCGAACT	Standard	YMR316C-A::chr00_8:dntag	522.6	568.75	1009	854.2	727.6	872.2	792.2	763.2	473.6
ATCGGTGAACCTGCGCCTAA	Standard	YNL052W::chr00_16b:uptag	100.2	84	123.6	96.8	84.4	136	135.8	108.4	83.6
ATCGGTTCACAACTACTACG	Standard	YJL184W::chr10_1:uptag	73.3333	68.25	80.6	79	68.6	91.4	96.4	84	55
ATCGTAACCTCATTCAACGG	Standard	YOR130C::chr15_2:dntag	66.5	61.6	73.6	76.8	68.4	88.6	83.4	82.8	63.2
ATCGTACTAACCTGTAGCAC	Standard	YJL183W::chr10_1:uptag	53	59.2	56.8	55.8	56	60.4	64.75	61.2	42
ATCGTATCAACCGTGCAGAA	Standard	YJL181W::chr10_1:uptag	3262.2	3230.4	3782.25	3912.4	3943.4	3707	4249	3458	2026.6
ATCGTCAACGCCAATTAAGC	Standard	YCR016W::chr3_1:uptag	968.4	995.2	1367	1411.2	760.8	1582.2	1397.25	1568.2	590.2
ATCGTCACAAGCACGGACAG	Standard	YGR189C::chr7_5:dntag	378.6	238.2	684.8	507.2	346	782	638.6	612.6	212
ATCGTCAGAACCGTATGTAC	Standard	YJL182C::chr10_1:uptag	2518	2287.2	2620.6	2721.8	2397	2673	2846.4	2453.2	1196.8
ATCGTCGAACCCTCGGATA	Standard	YMR317W::chr00_8:dntag	1990.8	2014.4	3058.4	3116.6	2971.4	2885	2200.4	2587	2225.4
ATCGTCGTAACCGGCGCATA	Standard	YJL132W::chr10_1:uptag	70.4	68	86.6	86.4	78	94.2	91.4	89	64
ATCGTCTTAACGCGAGAGAA	Standard	YJL131C::chr10_1:uptag	118.8	85.4	174.2	118.4	101.2	186	142.4	153	74.8
ATCGTGACAACCTCTCATAG	Standard	YJL130C::chr10_1:uptag	219.6	159.2	582.4	382.6	402.2	627.4	424.25	502.2	113
ATCGTGAGACACAGAGACGT	Standard	YJL129C::chr10_1:uptag	313.2	200.2	502.8	365.4	268.8	584.8	461	448	172.8
ATCGTGATACAGAAGTACCG	Standard	YGR190C::chr7_5:dntag	103.4	99.8	102	100.8	91.6	116.6	116.6	101.4	72.2
ATCGTGTAACGCAATCACAG	Standard	YJL178C::chr10_1:dntag	335.4	279.2	441.8	401.75	253.4	538.6	329.6	445	217.4
ATCGTGTCACAAGATAAGGG	Standard	YOR131C::chr15_2:dntag	1853	1874.4	3309.4	3185.2	2913.2	3628.8	2941.2	3204.4	2088
ATCGTTAAGGAGGAAGACTC	Standard	YGR191W::chr7_5:dntag	67.6	64.8	77.4	76.8	78.6	85	87.6	85.8	54.4
ATCGTTACACAATTTGAGCG	Standard	YJL177W::chr00_14:dntag	1076.4	1079.6	975.6	1361	1337.8	1230.4	1308.2	1337.2	705.2
ATCGTTCGACATCTAGACG	Standard	YJL176C::chr10_1:dntag	57.5	56.2	58.6	59.6	62.4	64.8	62.2	59	49.2
ATCGTTGCACCAGAACTACA	Standard	YGR192C::chr7_5:dntag	810	707.2	1352	1523.4	1254.8	1816	1150.8	1285.8	828.2
ATCGTTTAAGAGTCCACACC	Standard	YJL127C::chr10_2:uptag	131.6	100.4	197	132.2	111	241.6	182	200.4	86.8
ATCTAAATCTTATGCCCGCG	Standard	YDL212W::chr4_3:dntag	66.8	65.6	72.2	73.2	64.4	82.6	87.4	76.2	58
ATCTAACCGTGTACCACAGA	Standard	YGR193C::chr7_5:dntag	410.75	368.25	662.4	577.8	468.8	817.4	634.75	614.6	279.6
ATCTAACTAACGCTACGACG	Standard	YJL126W::chr10_2:uptag	295	288.8	645.4	542	561.4	616.6	574.4	625.6	393.8
ATCTAAGAAGACATGCTCGG	Standard	YOR132W::chr15_2:dntag	877.4	1147.4	1560.4	1440.2	1227.6	1971.4	1312	1795.4	580.2
ATCTAAGCAACTCACAGTCG	Standard	YJL125C::chr00_15:uptag	318.6	181.2	593.8	418.6	256.8	664.8	561.8	501.8	168.8
ATCTACGAACGCGCACGAAG	Standard	YJL124C::chr10_2:uptag	596.5	1128.75	690	1353.4	764	1403.6	646.2	829.6	472.4
ATCTACTGACAAGACGGACG	Standard	YJL073W::chr10_2:uptag	2900.75	3016.8	2908.6	3333.6	3252.2	3143.2	3188	3027.2	1934.4
ATCTACTTAACGCGCTACAG	Standard	YJL072C::chr10_2:uptag	75.6667	72.8	83.6	85.6	78.4	87	99.2	92.2	55.8
ATCTAGCAATCAAGGACCGG	Standard	YGR194C::chr7_5:dntag	2259.8	2380.4	2997.4	3504.4	2743.6	3076	3181.8	3286.8	2650.8
ATCTAGCGAACGGAACTATC	Standard	YJL071W::chr10_2:uptag	73.5	71.2	80.6	78.8	73.4	80.8	79.2	111.2	57.8
ATCTAGTCAACCTGAGCTAC	Standard	YJL070C::chr00_15:uptag	2140.75	2177.25	2512	2522.4	2598.2	2715.2	2287.4	2548.2	1431
ATCTATGCAACCGCGTCAGA	Standard	YJL121C::chr10_2:dntag	654.4	529.4	600.4	596	564.2	790.8	736.2	615.2	354.6
ATCTATGGAACCTCTACTCG	Standard	YGR195W::chr7_5:dntag	48.6	47	57.4	51.2	49	58	58.4	50.8	44.4
ATCTATTCAACGCGACATCG	Standard	YJL118W::chr10_2:dntag	63.2	65.6	83	76.4	66.6	84.6	87.6	76.2	57.4
ATCTCAATAACGGTTCACGC	Standard	YJL119C::chr10_2:dntag	1953.6	1912.2	95	2105.4	2097	108.6	2066.6	2622	1771
ATCTCACTACAAGAGCCTAG	Standard	YJL117W::chr10_2:dntag	108.4	90.2	179	149.6	103.6	199.8	177.4	171.6	71
ATCTCAGAACCTCTATACGG	Standard	YGR196C::chr7_5:dntag	3518.4	2892	4142.4	4030.6	3975	4057.2	4291	4017.6	2932.4
ATCTCAGCAACCTTCAGTAG	Standard	YOR133W::chr15_2:dntag	158	109.4	227.2	160.6	115.4	292.4	204.4	203	100
ATCTCAGGACAATACAGCCT	Standard	YGR197C::chr7_5:dntag	214.8	134.8	393	286.6	194.4	444	406.4	390.2	121.2
ATCTCAGTAACTAAGGACCC	Standard	YJL067W::chr10_2:dntag	1994	1766.2	1956.5	2356.6	1973.4	2425.4	2118.6	2422	1887.8
ATCTCATAAGAATGGACGCG	Standard	YOR134W::chr15_2:dntag	2182.8	1844	2019.2	2317.4	2596.8	2478.4	2384.6	2682.8	1669.4
ATCTCATGCAATGCCAACTG	Standard	YGR198W::chr7_5:dntag	124.6	80.8	245	143.6	95.8	286.8	232	264.2	77.8
ATCTCCATAACCGTGATCGA	Standard	YJL066C::chr10_2:dntag	2460.2	2066.6	2670.5	2521.6	2353.2	2772.4	3076.75	2636.8	2010.8
ATCTCCGAACATGGGTTAAG	Standard	YDL213C::chr4_3:dntag	2053.8	1824.2	2649.2	2134.8	1689.2	2580.4	2207.6	2701.2	1867
ATCTCCTCAACGCATAATGG	Standard	YDL214C::chr4_3:dntag	58	51.5	63.75	57.6	52	71.2	74.3333	69	47.8
ATCTCGACACAAGCTAATCG	Standard	YJL064W::chr10_2:dntag	777.2	610.2	1097.2	1302.4	1073	1712.6	716.2	1118	748.6
ATCTCGCTAACCTCTGAGTA	Standard	YJL065C::chr10_2:dntag	1791.25	1446.4	1212.6	1514	1199.4	1477	1530	2060.6	1343.2
ATCTCTACAACCGCTATGAG	Standard	YIL015W::chr9_1:uptag	99.4	88.8	108	132.4	104.8	127.2	129.2	98.8	67.2
ATCTCTGAAGAAGCCGACAC	Standard	YIL016W::chr9_1:uptag	1459.6	1486.8	2295.4	2342.8	2217.8	2557.2	1693.2	2364.2	868.2
ATCTCTTGAAATGTGTGGCC	Standard	YDR509W::chr4_8:dntag	887.8	575.6	1056.8	985.8	852.6	1245	1120.2	1130	560.6
ATCTCTTTAACTATGCGGCC	Standard	YCR017C::chr3_1:uptag	2134.2	2782	3247.6	3413.8	2884.6	3706.4	3388	3852.2	1986.4
ATCTGAACGCATGGGAACGT	Standard	YGR199W::chr7_5:dntag	1982.2	1757.8	2074.4	2033.4	2131.4	2432	2303.6	2007.8	1729.2
ATCTGACAAGAATATCGGCG	Standard	YOR135C::chr15_2:dntag	1675	1784.2	536.8	893.6	654	838	881	1301.2	1606.6
ATCTGACTAACGATGATGCC	Standard	YIL017C::chr9_1:uptag	92	86.8	109.4	110.2	90.2	124.2	111	124.8	62.8
ATCTGAGCACAACTAAGACG	Standard	YIL018W::chr9_1:uptag	60.4	58	98	80	67.4	115.8	105	82.2	56.4
ATCTGCCTAACCTGCGTAGA	Standard	YIL066C::chr9_1:uptag	3015	2663.8	3159.8	2487.8	3025.4	3717.6	3150.6	3044.6	1968.2
ATCTGCTGACACACACTAAG	Standard	YIL067C::chr9_1:uptag	1198	1874	2802.2	2407	2240.8	2824.6	2520.2	2152.8	854.2
ATCTGGATAACCTGGGATAC	Standard	YER037W::chr00_11:uptag	54.75	56	62.4	59.6	54	65	62.2	61.4	48.6
ATCTGGCGAACAGGTGCATA	Standard	YGR200C::chr7_5:dntag	86.8	75.8	78.6	92.6	80.8	87	89.5	93	61.4
ATCTGGGAACCTCCATCAAG	Standard	YGL138C::chr7_2:uptag	1267.8	1210.8	1802.2	1789.8	1263.25	2129.4	2034.6	2340.2	1201.2
ATCTGGTAAATAGGTACGC	Standard	YIL068C::chr9_1:uptag	70.25	69.6	80.6	78.8	73.6	87.4	79.2	82	60
ATCTGTATAGACAAACCGCG	Standard	YIL020C::chr9_1:dntag	282.5	229.8	100.75	195.2	108	111.8	247.25	128.8	54
ATCTGTCGAACCGCCGTAGA	Standard	YIL021W::chr9_1:dntag	148.25	91.75	205.6	135.8	115	253	172.4	204.4	84.8
ATCTGTGAACGCCCAGGAAC	Standard	YCR019W::chr3_1:uptag	396.5	309.4	795.6	520	455.2	764.2	639.2	571.2	350
ATCTGTGCAACCATAGTACC	Standard	YIL022W::chr9_1:dntag	61.6	79.8	73.6	60	58.4	75.6	86.2	71.2	52
ATCTTAATAACGTGTCCGCC	Standard	YIL023C::chr9_1:dntag	105.4	100.8	122.2	104.2	99.2	138.4	145.4	127.6	124.2
ATCTTACGAACGGCAAGTAC	Standard	YIL071C::chr9_1:dntag	1467.25	1404	2408.2	2168	2220.8	2367.6	1635.4	2188.6	1581.4
ATCTTAGAACGCGCAGACAC	Standard	YIL072W::chr9_1:dntag	1780.75	1897.8	2731	2192.2	2051	2695.6	2070.6	2237.8	1680.8
ATCTTCAACGAGTTAGACGC	Standard	YIL073C::chr9_1:dntag	3127	2710.2	3894.6	3527.8	3950.4	4093.2	3506	3387.2	2310.8
ATCTTCCTAACGATCTGTCG	Standard	YIL074C::chr9_1:dntag	745.8	548	832.8	704.8	620	706.8	712	602.2	546.6
ATCTTCGACCAGAACTGACG	Standard	YEL025C::chr5_2:dntag	1162	1131.25	1869.8	2183	1496.6	1939.6	1557	1969.4	1257.2
ATCTTCTCACAAGCAGTACG	Standard	YEL026W::chr5_2:dntag	262	168	525.2	374.2	235.8	569.6	484.8	455.2	157.4
ATCTTTAACTCCGAATCCGG	Standard	YGR202C::chr7_5:dntag	1019.4	1017.4	1367.8	1682.8	1094	1602.4	1363	1303.2	766.4
ATCTTTAGACAACTGTGCCG	Standard	YOR136W::chr15_2:dntag	71.6	77	85	82.2	79.4	92.4	91.2	81.6	63.4
ATCTTTGAACCGTCTGGAAC	Standard	YCR020C::chr3_1:uptag	393	242.8	751.2	621.4	499.4	995.2	719.6	1062.8	133.6
ATGAAACGGAGAGACCTGTC	Standard	YEL027W::chr5_2:dntag	74.2	70.2	88.4	78.2	72.2	92.4	96.4	87.2	61
ATGAAAGTAGTACAGCCCGC	Standard	YEL028W::chr5_2:dntag	342.75	255	569.2	421.4	280	693.6	513.2	522.4	194.4
ATGAAATGTTGGGAACGCCC	Standard	YGR203W::chr7_5:dntag	639.8	557	1005.2	886.8	729.4	1109	759.6	954.8	736.8
ATGAACCCGTGCCAACGTAG	Standard	YOR137C::chr15_2:dntag	1556.8	1604.6	2311.4	1979.2	2199.6	2469.6	1685.25	1775.2	1461.8
ATGAACCGATTCTAACGGAC	Standard	YOL153C::chr00_15:uptag	223.8	201.6	340	494.4	576.2	563.6	600.4	758.8	171.8
ATGAACCTCGATCAACCTGT	Standard	YGR205W::chr7_5:dntag	2683.75	2152.2	2947	2760.4	2555.2	3105	3154.6	3083.2	2661.4
ATGAACGAACTTACACGCCT	Standard	YGR206W::chr7_5:dntag	257.4	256.25	326	328.4	182	507.8	264.5	369.2	164
ATGAACGCCATTACAACTCG	Standard	YOR138C::chr15_2:dntag	741	601.8	1072.2	1192.8	1153.6	1330.2	1002	1029.6	676.6
ATGAACGTAGAATACTCGGG	Standard	YGR207C::chr7_5:dntag	2468.75	2265	2397.4	2649	2559	2975.4	2331.6	2086.6	2039.2
ATGAATAAGACAGCCTCCCG	Standard	YGR208W::chr7_5:dntag	302.2	185.8	570	393.6	243.8	645	542.6	501	181.4
ATGACAACTCGACACACGGG	Standard	YGR209C::chr7_5:dntag	2059.4	1846	3305.4	3110.2	2941	3538.6	3308.8	2734.6	2292.8
ATGACAAGAGAAGCTCCTCG	Standard	YOR139C::chr15_2:dntag	172	136.6	212.2	200.2	163.2	239.2	147	187.4	124.8
ATGACCCAACCGTGCGAGAA	Standard	YGR210C::chr00_8:dntag	1263.8	1125	1156.4	1116.4	1268.6	1253.8	1084.2	1083.4	787.2
ATGACGACAACTCACTACGG	Standard	YLL033W::chr12_1:uptag	90.2	81.4	81	90.8	91.8	95.2	88	86.8	56.2
ATGACGCAACGCGAATGACC	Standard	YLL034C::chr12_1:uptag	68	72.4	74	72	69.2	83.8	79.4	81.4	51.4
ATGACGCGAACCTACCTAGA	Standard	YLL035W::chr12_1:uptag	141.75	70	85.6	88.8	88.8	105	99	86.8	55.8
ATGACGGCAACCTCTCGATA	Standard	YLL036C::chr12_1:uptag	59.2	62.8	71	66	67.4	72	67.6	73.8	54.6
ATGACGTTAAGCGCGAAGAC	Standard	YLR018C::chr12_1:uptag	2461.6	2249.6	3122	3491.4	2538.2	3509.2	3714	3498.8	1468.2
ATGACTAACGCCTATACACG	Standard	YLR019W::chr12_1:uptag	2305.75	2616.75	3700.2	3027	3012.8	3672.2	3306.8	3267.6	1280.4
ATGACTCCAACGCCGTGAGA	Standard	YLR020C::chr12_1:uptag	708.4	783.4	1393.2	1096	1002.6	1521.8	1176.4	1314.6	556.2
ATGAGAACGGCAGATACCGC	Standard	YGR211W::chr7_5:dntag	75	77.8	102.4	90.2	72.8	124	106.75	103.8	60.4
ATGAGAAGGAGACCTCGCT	Standard	YLR033W::chr00_8:dntag	65.2	59.2	73.6	72.6	68	81.8	81.6	82.2	56
ATGAGAATAACTTAGCGGCC	Standard	YCR020C-A::chr3_1:uptag	86.8	76	127.2	128.4	114.6	157	122	159.6	69.2
ATGAGACAACTTCCAAGCCG	Standard	YDL215C::chr4_3:dntag	299.6	219	690.6	553.2	446.8	855.8	612.2	706.2	241.2
ATGAGCCTAACCTCTCTAGT	Standard	YLR021W::chr12_1:uptag	1029.6	1482	1256.6	1906.4	1355.4	1994	1174.2	1589.8	542
ATGAGCTGAACCGTGATTAC	Standard	YLL041C::chr12_1:dntag	63.2	58	70.4	68.2	65.8	75.8	74.6	69.6	52
ATGAGGAACGACAGGACCCT	Standard	YLR034C::chr00_8:dntag	115.4	97.6	170.6	133.8	108.8	191.4	151.4	147.8	93.4
ATGAGGAGAACGTAGTATCC	Standard	YLL042C::chr12_1:dntag	1652.8	1521.8	1522	1701.2	1779	2026	2187.5	1638	1072
ATGAGGGAACGCCGATCAAC	Standard	YCR021C::chr3_1:uptag	2374	2608.75	3507	3911.6	3603.2	3895.4	4028.25	4077.2	1673.2
ATGAGGTAACGGAGCTACAC	Standard	YLL043W::chr12_1:dntag	320.6	1028	830	1422.4	649.6	2005	327.4	1527.8	216.2
ATGAGTAACGAATGATCGCG	Standard	YGR212W::chr7_5:dntag	1708.4	1797	1848.8	2090.8	2068	2312.2	1780	2239.4	1274
ATGAGTGTAACGCCTCGACA	Standard	YLL044W::chr00_8:dntag	119	90.8	86.4	87	88	87.6	95.8	92	66.6
ATGATAACGTACACACCTGC	Standard	YGR213C::chr7_5:dntag	1235.75	1561.6	1421.4	2124	1616.4	1511.2	909	1389.2	1072
ATGATATTAACGGCTACGCC	Standard	YLR026C::chr12_1:dntag	73.4	66	66.6	61	62.2	71	84.8	76.4	53
ATGATCCCAAGACAAGTCCG	Standard	YGR214W::chr7_5:dntag	303.75	292	525.6	530.8	477	814.2	472.6	638.6	243
ATGATCCGAACGGCAGCACA	Standard	YNL051W::chr00_16b:uptag	258.25	149	419.8	289.4	182	495.4	381.2	380.2	112.6
ATGATCGGAACGGACAGATT	Standard	YGR215W::chr7_5:dntag	104.25	91.2	148	120.6	96	206.2	170.8	128.6	86.8
ATGATGATAACTACGTGCCC	Standard	YLR027C::chr12_1:dntag	69.8	70.2	73.8	87.6	83	89	86	86	60.4
ATGATGCTAACCTGTCACAC	Standard	YLR028C::chr12_1:dntag	55.4	58.8	62	70.6	65.8	73.4	67.2	69.4	48.6
ATGATGGTAACGGCACGTAA	Standard	YLR029C::chr12_1:dntag	69.8	69.6	96	84.6	81	112	93.6	88	57.6
ATGATTAACTAGACACCGCC	Standard	YOR336W::chr15_4:uptag	208.8	114.75	295.8	235	150	386.6	329.333	289.2	115.4
ATGATTATACATGCACCGCC	Standard	YCR022C::chr3_1:uptag	296.5	332.4	656.4	519.6	470	747	661.4	655.6	359.6
ATGATTATAGGATAGCCTCG	Standard	YJR123W::chr00_12:uptag	52.25	56.6	67.4	56	51.6	64.8	62.8	62	45.4
ATGATTGAACGCCTACGAAC	Standard	YOR337W::chr15_4:uptag	1704.8	1536.2	1726	2289.8	2205.2	2271.4	2203.25	2408	1119.4
ATGCAAACACATTATCCGCG	Standard	YDL216C::chr4_3:dntag	3529.25	2874.6	4589.6	4573	4111	4853.2	4804	5127	2688
ATGCAACCTCCCTAGAAGAT	Standard	YGR216C::chr7_5:dntag	50.5	54.2	68.6	66.2	61.4	78.8	81.2	72.4	48
ATGCAAGAAGACTATCGCCC	Standard	YGR217W::chr7_5:dntag	79.8	67.6	80.6	81.6	81.6	89.4	92.4	85.2	77
ATGCAAGTACAAGAGCGGTT	Standard	YLR035C::chr00_8:dntag	2797.2	2197.5	4164	2851.4	2957.4	4102	2452.8	2880.8	2344.6
ATGCAATCACAACTGACTGG	Standard	YDL217C::chr4_3:dntag	76.2	71.6	99.25	97.4	74.6	96.8	113.4	93.4	64.8
ATGCAATGAACTCTAAGCCC	Standard	YDR510W::chr4_8:dntag	74	65	99.8	86.8	79.4	109	111	90.2	62
ATGCACAACTATCAAGCCTG	Standard	YDL218W::chr4_3:dntag	1951.2	2109.2	2276.2	2336.6	2652.2	2605	1966.4	2357	1367
ATGCACACACCCAGAGAGGT	Standard	YLR036C::chr00_8:dntag	313	207.8	583.8	409.2	291.6	646.4	469.5	479.8	191.8
ATGCACCGAACGCCGAGTAA	Standard	YOR338W::chr15_4:uptag	495.4	519.8	1020.4	920.25	681.6	1315.2	1025.4	907.6	528.2
ATGCACTTAACGCTAGGTAC	Standard	YOR339C::chr15_4:uptag	3322	3659.8	3475.2	3426	2965.4	4198.2	4133.8	3662.4	1987.4
ATGCAGTTAAGGCTAAGCAC	Standard	YCR023C::chr3_1:uptag	3193.25	3837	4421.5	4387	4143.4	4617.2	5335.75	5025.8	2480
ATGCCAGCAACGCGCTAGAA	Standard	YDL227C::ctrl_54:uptag	1934.2	1929	1651.6	1969	1709.6	2028.2	1415	1736.6	1449.2
ATGCCCAACGATAAGACCGT	Standard	YGR218W::chr7_5:dntag	100.6	84	147	116.2	95.4	177	132	125.6	71.8
ATGCCCACAACGGTCGAGAA	Standard	YNL146W::chr14_3:dntag	293.4	179.25	577.4	402	228.6	686.4	490.6	455.2	167.2
ATGCCCTTAACCGTCGTTGA	Standard	YNL145W::chr14_3:dntag	1725.6	1738.6	1918	1703.8	1513.6	2050.6	1857.2	2041.2	995.2
ATGCCGATACACAATAGCCG	Standard	YKL001C::chr11_1:uptag	903.6	869.8	1339.2	1148.8	1114.4	1395.2	945	1406.6	737
ATGCCGCAACATTGTCTAAC	Standard	YCL001W::chr3_1:dntag	1877.8	1749.2	2710.4	2180	2020	3377.4	3193.8	3068.2	1847.6
ATGCCGGGAGCCGTTGACAA	Standard	YLR197W::chr12_3:uptag	105.25	105	174.75	129.4	115.4	190.6	173.6	160.6	94.2
ATGCCTATAACCTTCCGAGA	Standard	YNL144C::chr14_3:dntag	3922.4	3787.25	4014	3685.4	3307.2	4255	3886.5	4009.8	3001.4
ATGCCTTTAACTCGGAAGAC	Standard	YCL002C::chr3_1:dntag	2590.8	2384.2	3729.2	3239	3502.6	3762	3951.4	3611.6	2278.6
ATGCGAACGTAAGACAGCGT	Standard	YOR292C::chr15_4:dntag	2088	2324.8	2372.2	2256	2481	2954.4	3287	2890.4	1796.6
ATGCGAATAACTATGACGCC	Standard	YOR293W::chr15_4:dntag	153.4	124	129.8	249.4	128	209.8	198.8	242.6	177.8
ATGCGACGAACGCGGATATA	Standard	YOR294W::chr15_4:dntag	76.4	68	75.2	73.8	75.2	81.6	81.8	82.2	55.2
ATGCGAGAACCTGGATTAAC	Standard	YCL003W::chr3_1:dntag	56.2	53	63	66.2	59.6	69	68	65.6	54
ATGCGCGTAACCTCGTACAA	Standard	YOR295W::chr15_4:dntag	81.3333	74.8	75.4	85.4	75.8	81.6	82.4	89	58.4
ATGCGCTCAACCTGTACTAA	Standard	YOR343C::chr15_4:dntag	2005.2	1906.6	3105.25	2339.2	2100	3092.4	2830.75	3140.2	2600.4
ATGCGGAACGATGGTTAATC	Standard	YCL004W::chr3_1:dntag	85	63.4	73.25	82	67	95.2	81.5	82.6	55.8
ATGCGGACAGACCAATACCG	Standard	YOR140W::chr15_2:dntag	523	572	932.6	1139.4	793.4	1227.4	995	1261.6	544.6
ATGCGGCTAACGCCTCACAA	Standard	YNL143C::chr14_3:dntag	702	623	1288.6	1201.6	1294.4	1145.8	1226.25	1224.2	935.8
ATGCGGCTAACGCCTCATAA	Standard	YNL142W::chr00_17b:dntag	2217	2008.8	3568.25	3377.2	3449.2	3152.2	3563.25	3508.4	2765.6
ATGCGGTTAAGCGGTAATAC	Standard	YOR344C::chr15_4:dntag	597.6	646.4	729	730.4	634.2	1005	788.8	886.6	509.2
ATGCGTAACGAGTGGTAACT	Standard	YOR345C::chr15_4:dntag	3574	2937	3578.4	3436.8	3311.4	3445.8	3931.6	3701.6	3126.8
ATGCGTTTAACTTACAGCCC	Standard	YCL005W::chr3_1:dntag	228	130.5	391.6	274	180.8	470	356.6	384.8	126.6
ATGCTAATAACTGATCGCCC	Standard	YCL006C::chr3_1/chr00_12:dntag	1631.8	1394.75	2718	1997.6	2260.4	2759.8	2848	2688.6	1445
ATGCTACGAACTACCAATCG	Standard	YOR346W::chr15_4:dntag	3261.8	3244.8	4780	4060	4011	4910.4	4493	4710	3872
ATGCTAGAACCCGTGGGAAC	Standard	YCL007C::chr3_1:dntag	58.75	57.6	67.2	63.8	61.6	77	70.2	70.6	49.8
[truncated: 9,922 more rows]
