# Supplementary material for: A Systems Biology Approach Reveals the Role of a Novel Methyltransferase in Response to Chemical Stress and Lipid Homeostasis
Source: PLoS Genet. 2011 Oct 20;7(10):e1002332. doi: 10.1371/journal.pgen.1002332 (PMC3197675; doi:10.1371/journal.pgen.1002332)
Supplement: Dataset S3 — Glycerophospholipid and sphingolipid analysis by liquid chromatography-tandem mass spectrometry in S. cerevisiae. (XLS) [file pgen.1002332.s003.xls]

## Sheet: ion intensities
	wt_dmso_1	wt_dmso_2	wt_dmso_3	wt_drug_1	wt_drug_2	wt_drug_3	crg1null_dmso_1	crg1null_dmso_2	crg1null_dmso_3	crg1null_drug_1	crg1null_drug_2	crg1null_drug_3	CRG1oe_dmso_1	CRG1oe_dmso_2	CRG1oe_drug_1	CRG1oe_drug_2
16:1 PC	0.00454859	0.00787383	0.00781176	0.0119324	0.0111527	0.0108359	0.00850495	0.00735866	0.00741432	0.019041	0.0158333	0.0145106	0.00993069	0.00836417	0.00910823	0.00918794
18:1 PC	0.0011583	0.00197152	0.00212562	0.00400156	0.00350474	0.00322316	0.00213038	0.00184303	0.00188468	0.00616643	0.00530926	0.00467246	0.00193291	0.0017244	0.00252748	0.00258198
26:1 PC	0.00274287	0.00317958	0.00352673	0.00266771	0.00226842	0.00261964	0.00338105	0.00347629	0.00389191	0.00174585	0.00194161	0.00207418	0.0036557	0.00381976	0.00268367	0.00225556
26:0 PC	0.00296785	0.00298719	0.00306486	0.00122187	0.00105688	0.00117174	0.00282048	0.0030411	0.00347289	0.0010235	0.00110036	0.00113639	0.00256959	0.00293731	0.00180267	0.0014245
28:1 PC	0.0127135	0.013961	0.0147005	0.00997909	0.0109138	0.0120487	0.0124911	0.0157729	0.0160879	0.0100162	0.0118839	0.0113941	0.0151094	0.0158307	0.0119807	0.0110022
28:0 PC	0.00532927	0.00583025	0.00564108	0.00217159	0.00233584	0.00267224	0.00476642	0.00593889	0.00626246	0.00202563	0.00242879	0.00243338	0.00544205	0.0057615	0.00401777	0.00334675
30:2 PC	0.00562262	0.00665149	0.00736467	0.00492434	0.0067884	0.00699932	0.00625437	0.00792971	0.00806483	0.0053169	0.00656048	0.00620604	0.00832539	0.00923704	0.00843053	0.00815364
30:1 PC	0.0222186	0.0270405	0.0286964	0.0169361	0.0196431	0.0218168	0.0249939	0.0300504	0.0302478	0.0189098	0.0223902	0.0207605	0.0331615	0.0353665	0.0296	0.0274609
32:2 PC	0.158168	0.204588	0.225454	0.172262	0.207405	0.21232	0.189773	0.21802	0.222739	0.17692	0.207822	0.192628	0.216426	0.226869	0.218374	0.205214
32:1 PC	0.0712259	0.0803611	0.0854911	0.0368769	0.0501789	0.0551108	0.0641229	0.0781217	0.0835684	0.0359318	0.0449774	0.0410393	0.0761007	0.0773511	0.0835409	0.0735033
34:2 PC	0.0837326	0.0970963	0.104671	0.0726739	0.0914501	0.0997198	0.0840264	0.101538	0.102221	0.0766296	0.0909264	0.0856957	0.0933978	0.0961166	0.102823	0.0999
34:1 PC	0.0318246	0.0363855	0.0376579	0.0208881	0.0274199	0.0271736	0.0303585	0.0363578	0.0364976	0.0168129	0.0198531	0.0188823	0.0287556	0.0293147	0.0379462	0.036552
36:2 PC	0.00519105	0.00575139	0.00582555	0.00586413	0.00702337	0.00706092	0.00506588	0.00586499	0.0055154	0.00550614	0.00606442	0.00590205	0.0046256	0.00463492	0.0071442	0.00679106
36:1 PC	0.00350799	0.00394099	0.00366544	0.00359191	0.0040431	0.00418243	0.00334478	0.00356811	0.00361586	0.00240715	0.00251664	0.00244485	0.00288391	0.00279679	0.00480325	0.00486317
16:1 PE	0.0136965	0.0160284	0.0128716	0.0312738	0.0277422	0.0302692	0.0115738	0.0145128	0.0104625	0.0508185	0.0478636	0.0425873	0.0200678	0.0198859	0.0168266	0.0247871
16:0 PE	0.0106694	0.00811916	0.00757617	0.0270684	0.0213346	0.0257245	0.00711419	0.00789851	0.00668807	0.0600101	0.0627724	0.0509	0.0120226	0.011116	0.00955905	0.011903
18:1 PE	0.0200485	0.0169597	0.0170136	0.0310534	0.0284939	0.0319572	0.0155852	0.0154794	0.0168416	0.0405181	0.0403139	0.0393451	0.0144904	0.0147692	0.0181296	0.0200981
28:1 PE	0.00183612	0.0016658	0.00128454	0.00139566	0.00184351	0.00196216	0.0017461	0.00122896	0.00125815	0.00185638	0.00175915	0.00119449	0.00163616	0.00163109	0.00193203	0.00147164
30:1 PE	0.0037715	0.00346277	0.00363079	0.00400333	0.0039913	0.00365019	0.00370457	0.00365927	0.00249423	0.00372566	0.00303453	0.00358348	0.00438417	0.00378726	0.0043583	0.00359254
32:2 PE	0.0383105	0.0357295	0.0299901	0.0481502	0.0409332	0.039676	0.0364794	0.0326987	0.0289596	0.0281551	0.0255663	0.0242555	0.0348022	0.0324319	0.033979	0.0326215
32:1 PE	0.0398985	0.0316109	0.0279322	0.0347629	0.0299079	0.0294035	0.0338721	0.0293432	0.0252734	0.0235786	0.0225318	0.0187462	0.035444	0.0311807	0.025049	0.0247871
34:2 PE	0.100987	0.0819812	0.0745715	0.0869899	0.0799691	0.0776495	0.0823506	0.0814458	0.0644085	0.0521205	0.0430992	0.0452445	0.07566	0.0714793	0.0728448	0.0715768
34:1 PE	0.0461513	0.043324	0.0367012	0.0332203	0.0332727	0.0297209	0.0447498	0.0376422	0.0302177	0.0252288	0.0223412	0.0195263	0.040009	0.0345657	0.0257454	0.0262443
36:2 PE	0.00263012	0.00225605	0.0017302	0.00372788	0.00374072	0.00365019	0.00247758	0.0019332	0.00150095	0.00256542	0.002756	0.00187706	0.00178079	0.00217851	0.0024712	0.00308757
36:1 PE	0.00168725	0.00131166	0.000904421	0.00167112	0.00139606	0.00134177	0.00112081	0.00146371	0.000750477	0.00117313	0.00108481	0.000901964	0.00102147	0.00109484	0.0012693	0.00128408
16:1 PS	0.000454598	0.000429824	0.000461909	0.000342696	0.000424386	0.000420983	0.000478404	0.000464884	0.000401328	0.000369173	0.000367819	0.000445261	0.000458649	0.000452845	0.000536432	0.000509508
16:0 PS	0.00104193	0.00101597	0.000968762	0.000835582	0.000886595	0.00103332	0.00102467	0.000990202	0.000928516	0.00145291	0.00135681	0.00170793	0.000897897	0.000830168	0.000649569	0.000683162
18:1 PS	0.000938692	0.000947888	0.00106906	0.000894188	0.00100727	0.00101984	0.00110092	0.00103503	0.0009301	0.000715185	0.000649785	0.000869068	0.000940839	0.000876753	0.00112305	0.00112499
30:1 PS	0.000147918	0.000171075	0.000176662	0.000125755	0.000126753	0.000122531	0.00019393	0.000207503	0.000156468	0.000109779	9.60369e-05	0.000145356	0.000245215	0.000255434	0.000203904	0.00018157
32:2 PS	0.00111914	0.00107458	0.00119105	0.000615661	0.000674514	0.00072276	0.00112953	0.00121433	0.000998175	0.000456409	0.000445597	0.000574417	0.00108132	0.00107388	0.00122818	0.00107914
32:1 PS	0.00340903	0.00329547	0.00348131	0.00225185	0.00231939	0.00273189	0.00357107	0.00371561	0.00284279	0.00130328	0.00136666	0.00169873	0.00386311	0.00391872	0.00313926	0.00300452
34:2 PS	0.00335821	0.00352444	0.00397086	0.00294437	0.00322777	0.00356688	0.00365928	0.00377872	0.00307876	0.00139813	0.00143262	0.00190932	0.00318742	0.00340401	0.00446926	0.00421548
34:1 PS	0.00556743	0.00599091	0.00624536	0.00375993	0.00385656	0.00428913	0.00635371	0.00631246	0.00480426	0.00189483	0.00187671	0.00247061	0.00564773	0.0061	0.00471532	0.00501152
16:1 PI	0.00153434	0.00139993	0.00128888	0.00272563	0.00250725	0.00241173	0.00163969	0.0012717	0.00150294	0.00503124	0.00381536	0.00482329	0.00169344	0.00155968	0.00162757	0.00214865
16:0 PI	0.00295538	0.00277463	0.00246538	0.0088705	0.00819847	0.0081377	0.00366952	0.00249625	0.00297215	0.0194196	0.0151965	0.0201236	0.00315507	0.00274041	0.00341946	0.00470599
18:1 PI	0.00114249	0.00157131	0.00157878	0.0034689	0.00331059	0.00267976	0.00185243	0.00147795	0.00180437	0.00611993	0.00458015	0.00560659	0.00182162	0.00158588	0.00195409	0.00270121
18:0 PI	0.000573607	0.000867452	0.000765273	0.00456909	0.0040755	0.00404193	0.00104141	0.00078458	0.00100442	0.00828886	0.00654401	0.00840329	0.000768768	0.00066624	0.00136594	0.0019764
26:1 PI	0.00220001	0.00132982	0.00129286	0.00144026	0.00124872	0.00117358	0.00189809	0.00140385	0.00158199	0.00153009	0.00124285	0.00144457	0.00157565	0.00136636	0.00101102	0.000964481
26:0 PI	0.0183318	0.0127299	0.0114989	0.00733112	0.00693016	0.00599863	0.0162449	0.0133261	0.0144983	0.00998971	0.00827753	0.00992208	0.014258	0.0131026	0.0067667	0.00644933
28:1 PI	0.00239121	0.00182105	0.00173293	0.00322227	0.00258261	0.00235997	0.00245486	0.00184433	0.00176959	0.00346284	0.00278214	0.00382713	0.00194529	0.00175481	0.00177207	0.00191898
28:0 PI	0.0201403	0.0143054	0.0130575	0.0138673	0.0111496	0.0100513	0.0210631	0.0144168	0.0161411	0.0175715	0.0144486	0.0167457	0.0159779	0.0144933	0.010919	0.0103113
30:1 PI	0.00556375	0.00480274	0.00463236	0.00697556	0.00554951	0.00451349	0.0071076	0.0048382	0.00532142	0.00777159	0.00688638	0.00782731	0.00604204	0.00622114	0.00570059	0.00622278
30:0 PI	0.00418757	0.00319301	0.00305706	0.0043073	0.00344624	0.00298353	0.00478825	0.00307821	0.00373416	0.00476547	0.00396891	0.00472396	0.00413962	0.00368394	0.00323625	0.00371979
32:2 PI	0.00777084	0.00696745	0.00633347	0.0170489	0.0133683	0.0116737	0.00852312	0.00579672	0.00664018	0.0172024	0.0145014	0.0167278	0.00635491	0.00568081	0.00795383	0.0084705
32:1 PI	0.0601718	0.0547189	0.051148	0.0625055	0.0475744	0.0453688	0.067677	0.0526288	0.0584255	0.0629866	0.0520562	0.0616398	0.0540961	0.0537723	0.0520282	0.0559437
34:2 PI	0.0118309	0.011872	0.0112658	0.0311106	0.0260424	0.0245103	0.0137703	0.0100384	0.0120213	0.0293305	0.024993	0.0286673	0.00984668	0.00997092	0.015039	0.0175296
34:1 PI	0.106843	0.0808295	0.0798589	0.0979875	0.0803268	0.0706746	0.102169	0.0796914	0.0912641	0.079835	0.0717244	0.0882318	0.0742502	0.0780289	0.080718	0.0922066
36:2 PI	0.00129357	0.00106037	0.00105617	0.00378962	0.00300915	0.00307542	0.00133043	0.00100897	0.00110138	0.00276432	0.00246145	0.0029899	0.000917395	0.000909248	0.00211888	0.00233922
36:1 PI	0.0204039	0.015532	0.0150384	0.0229818	0.0201551	0.0178671	0.0177532	0.0147056	0.017563	0.0158121	0.0153379	0.0189396	0.0125027	0.0125285	0.0173678	0.0205829
t18:0/18:0 IPC-B	0.000113305	0.000109978	9.09974e-05	0.000166669	0.000128867	9.22464e-05	0.00013076	9.69066e-05	0.000113827	0.000167246	0.000175703	0.000204341	0.000151744	0.000146799	0.000169855	0.000195559
t18:0/18:0 IPC-C	6.60947e-05	5.40725e-05	5.02226e-05	9.00686e-05	7.76213e-05	7.43096e-05	7.83521e-05	5.64856e-05	5.48057e-05	9.26203e-05	0.000109949	0.000123456	5.68175e-05	5.91711e-05	4.71538e-05	6.57412e-05
t18:0/20:0 IPC-C	0.000115666	0.00010952	9.79589e-05	0.000123739	0.000115302	0.000106083	0.000111561	9.12062e-05	0.000100126	0.000176243	0.000143904	0.000168865	8.79978e-05	9.57578e-05	7.75756e-05	0.000106517
t18:0/24:0 IPC-B	0.000103863	6.27791e-05	8.25441e-05	0.000131315	0.000131881	6.76474e-05	8.56165e-05	7.20322e-05	5.69136e-05	0.000150839	0.000149293	0.000178798	0.000178767	0.000170286	0.000149574	0.00019972
t18:0/24:0 IPC-C	0.000882836	0.000765722	0.000815496	0.00117173	0.0012849	0.000855842	0.0008214	0.000881487	0.000719852	0.00140307	0.00139107	0.00150559	0.000831822	0.000919185	0.00100595	0.00111011
t18:0/26:0 IPC-B	0.000177039	0.000220414	0.00013575	0.000221384	0.000529785	8.71216e-05	0.000184724	0.000131627	0.000119097	0.000299561	0.000254391	0.000316444	0.000206137	0.000290887	0.000261628	0.000317056
t18:0/26:0 IPC-C	0.0013337	0.0011369	0.000908482	0.00123655	0.00241681	0.000529392	0.00108188	0.000872677	0.000805222	0.00171004	0.00138891	0.00185467	0.000715415	0.000754319	0.000681956	0.000743125
t18:0/26:0 IPC-D	0.000132189	0.000103563	9.05001e-05	0.000179295	0.000291645	7.7897e-05	0.000103778	8.65422e-05	6.85071e-05	0.000237637	0.000189177	0.00021995	3.08339e-05	6.18813e-05	7.04772e-05	9.65313e-05
t18:0/24:0 MIPC-C	2.83263e-05	1.78714e-05	1.69066e-05	5.80816e-05	6.1042e-05	6.45725e-05	2.02366e-05	1.76194e-05	5.26977e-06	7.62133e-05	7.43772e-05	4.82471e-05	2.04404e-05	1.71641e-05	4.05624e-05	6.65733e-05
t18:0/26:0 MIPC-B	2.83263e-05	3.25352e-05	1.14368e-05	5.38728e-05	8.9679e-05	2.92114e-05	1.97177e-05	2.64291e-05	1.26475e-05	7.99181e-05	5.71303e-05	6.95325e-05	3.67235e-05	2.30361e-05	4.30976e-05	6.65733e-05
t18:0/26:0 MIPC-C	0.000205366	0.000295566	0.000244649	0.000904053	0.00125099	0.000453545	0.000363222	0.000247708	0.000203413	0.00116807	0.000861266	0.00115793	0.000243207	0.000250235	0.000413737	0.000490146
