# Supplementary material for: A Systems Biology Approach Reveals the Role of a Novel Methyltransferase in Response to Chemical Stress and Lipid Homeostasis
Source: PubMed Central journal article supplement (PMC3197675; doi:10.1371/journal.pgen.1002332), 2011-10-20

**Figure S6**

**A**

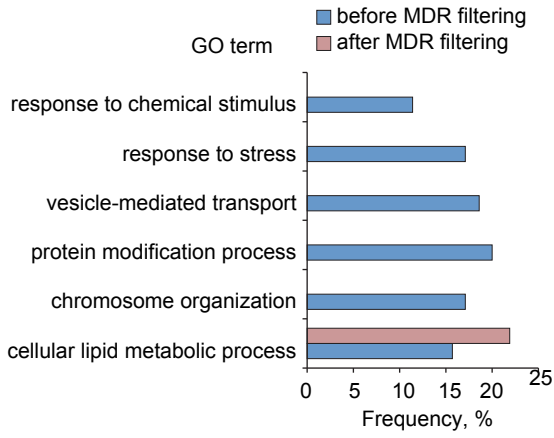

**B**

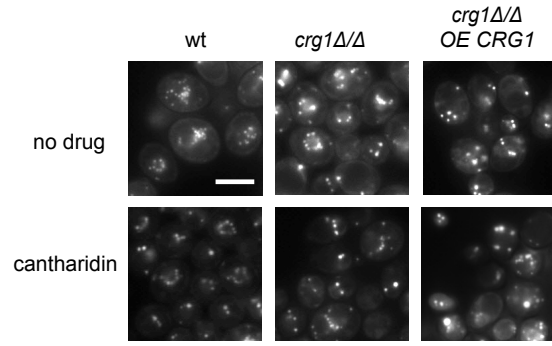

**C**

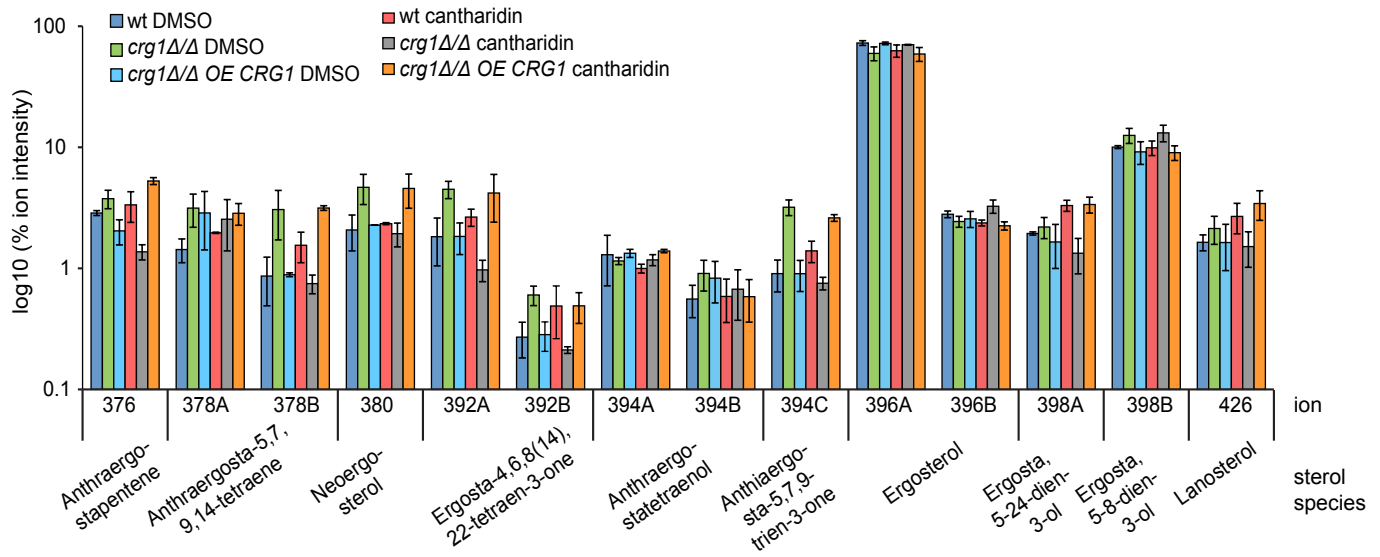

Supplement: pgen.1002332.s012.pdf [file pgen.1002332.s012.pdf]
